# Supplementary material for: A mechanism with severing near barbed ends and annealing explains structure and dynamics of dendritic actin networks
Source: eLife journal article supplement (doi:10.7554/elife.69031), 2022-06-06
Supplement: supp [file elife-69031-supp-v1.zip]

A

$$v_{\text{net}}/v_{\text{pol}} = 0.19$$

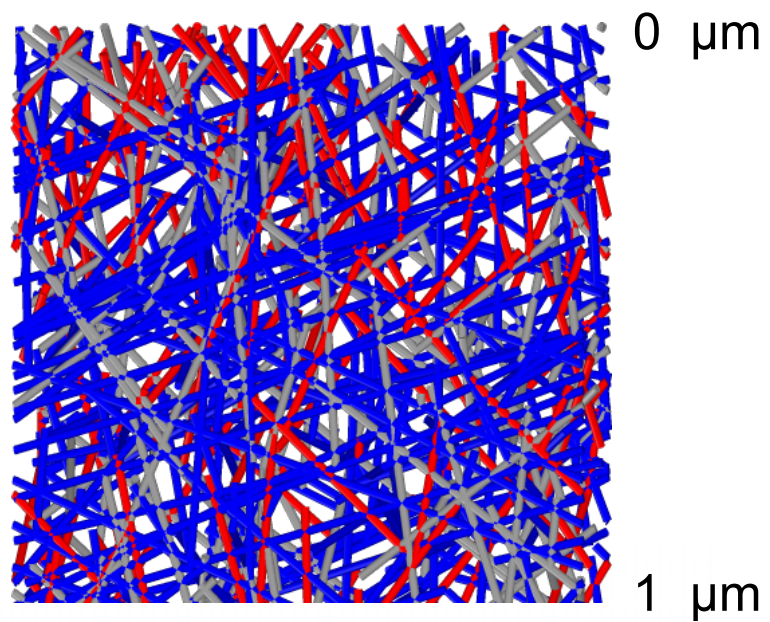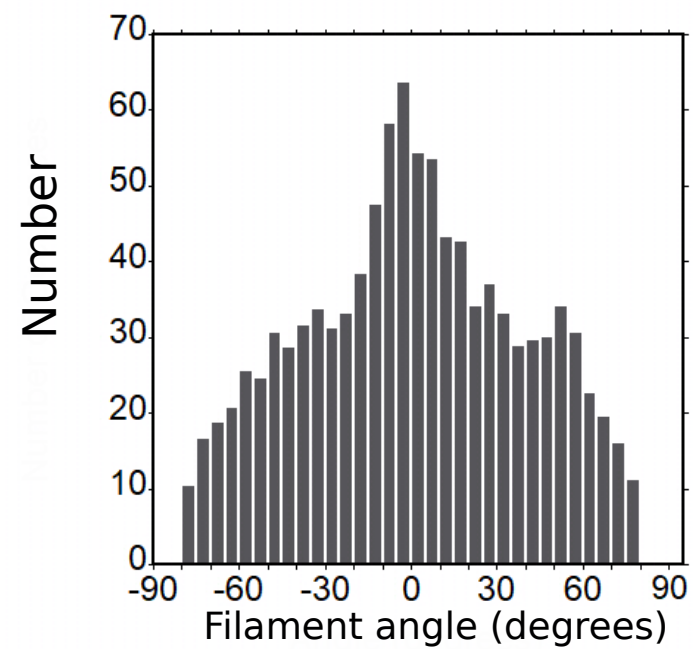

B

$$v_{\text{net}}/v_{\text{pol}} = 0.6$$

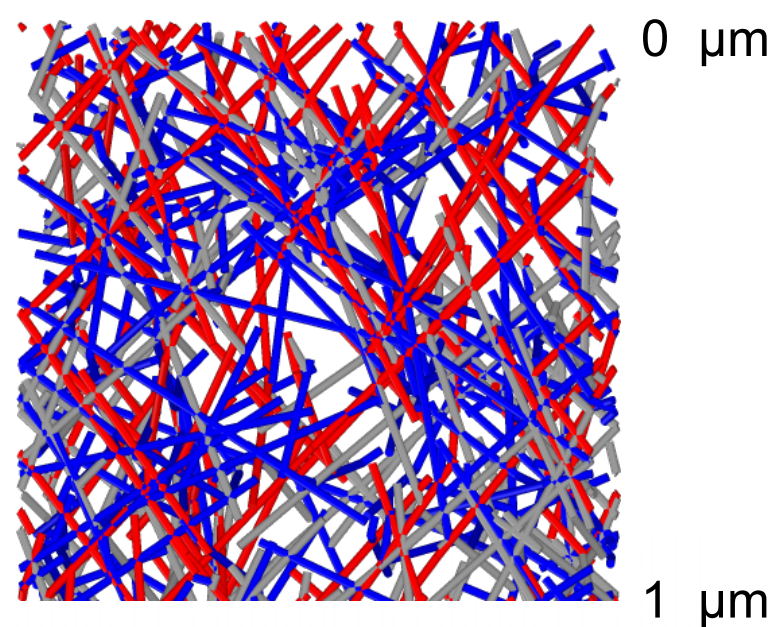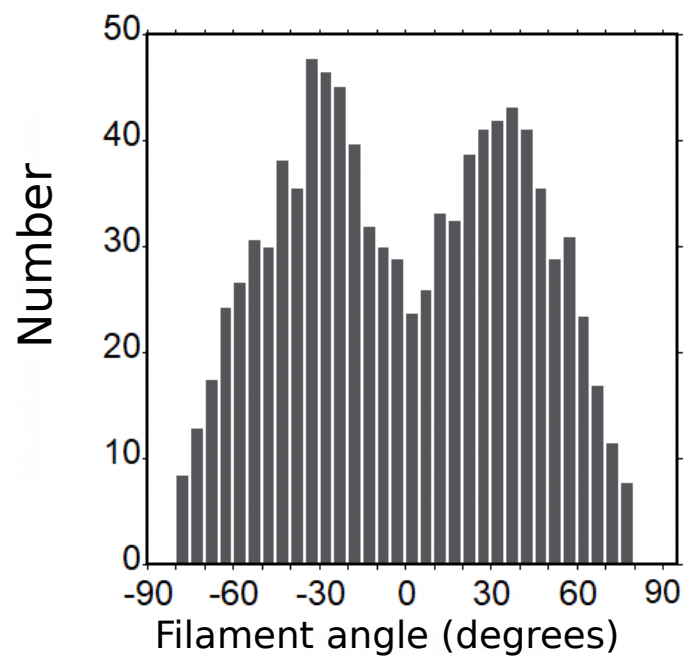

- $-35^{\circ}/35^{\circ}$  Filaments
- $-70^{\circ}/0^{\circ}/70^{\circ}$  Filaments
- Neither Orientation
