# Supplementary material for: A mechanism with severing near barbed ends and annealing explains structure and dynamics of dendritic actin networks
Source: eLife journal article supplement (doi:10.7554/elife.69031), 2022-06-06

# XTC Parameters

## A

### Actin Speckle Lifetime vs Distance

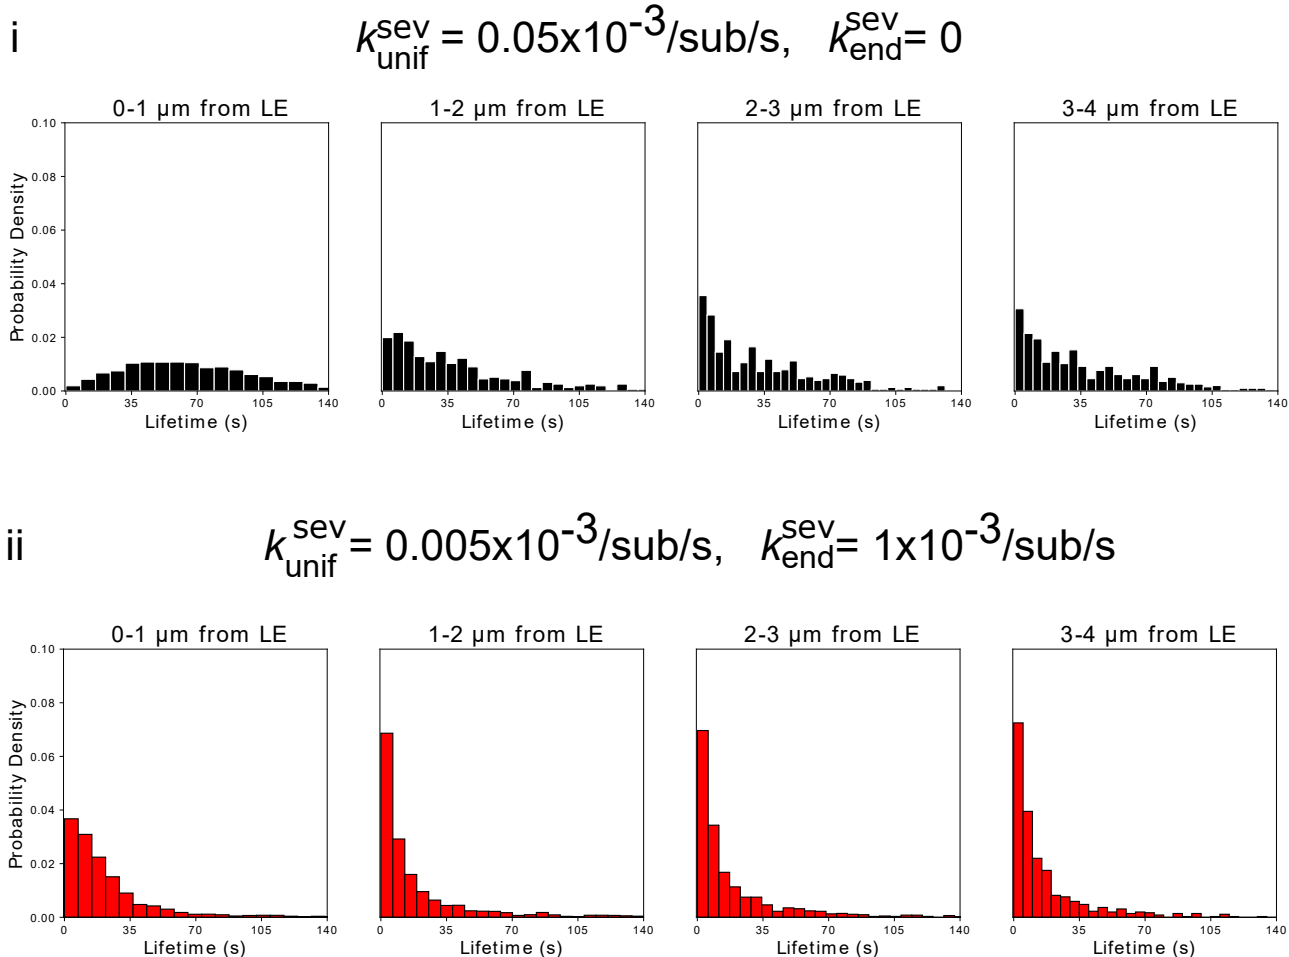

## B

### Severing to Annealing Distance

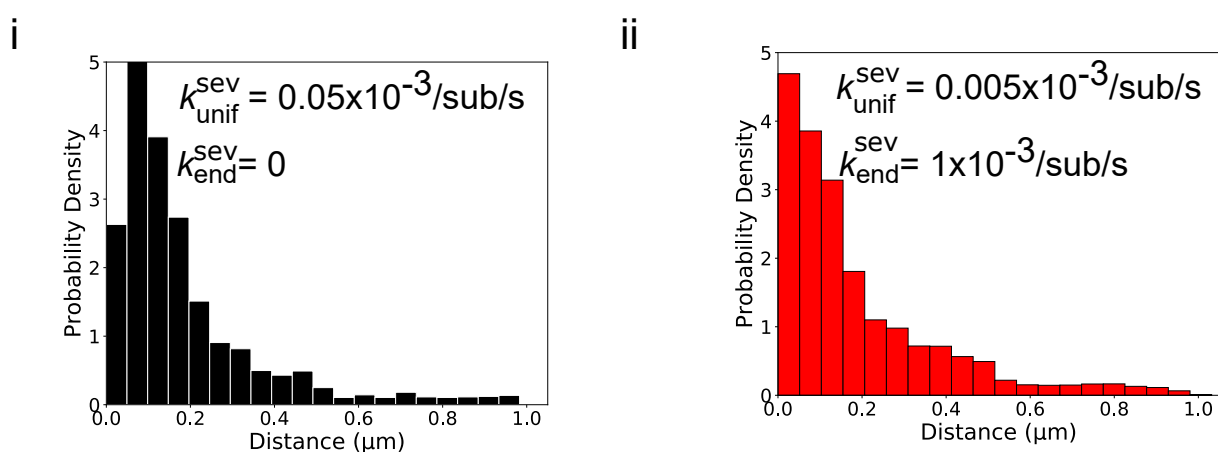

## C

### Severing to Annealing Distance vs Time

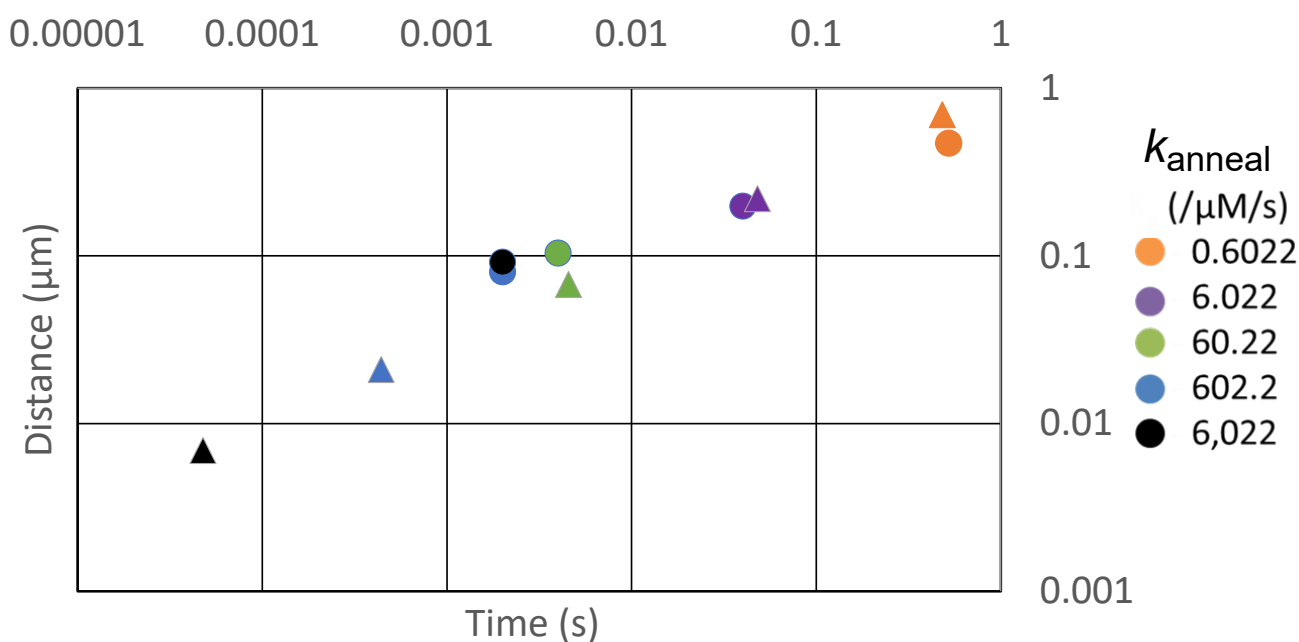

Supplement: supp [file elife-69031-supp-v1.zip]
