# Supplementary material for: A mechanism with severing near barbed ends and annealing explains structure and dynamics of dendritic actin networks
Source: eLife journal article supplement (doi:10.7554/elife.69031), 2022-06-06

# Keratocyte Parameters

## A Actin Speckle Lifetime vs Distance

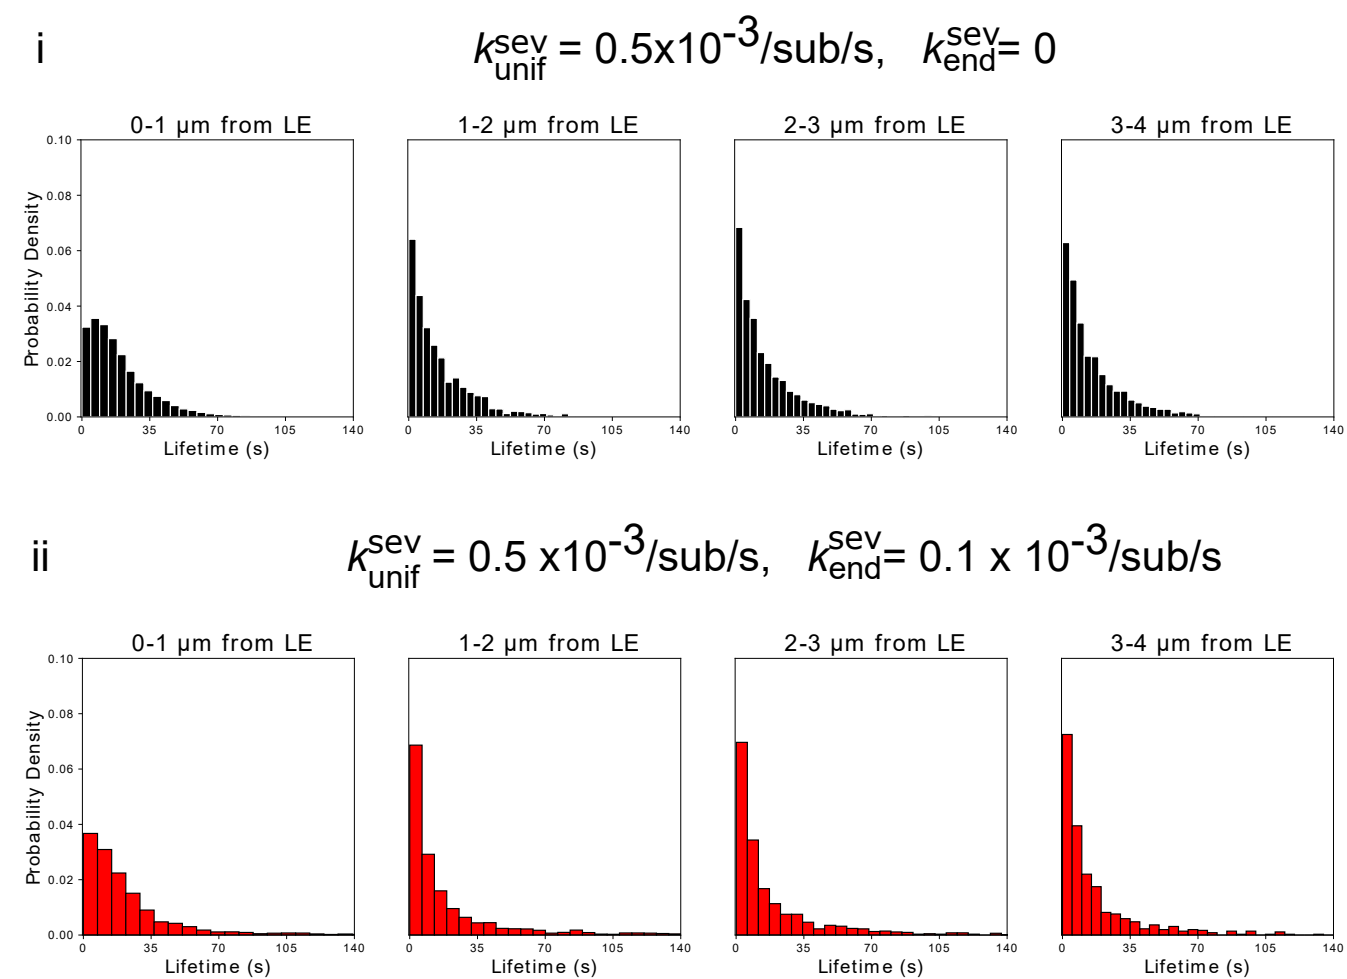

## B Severing to Annealing Distance

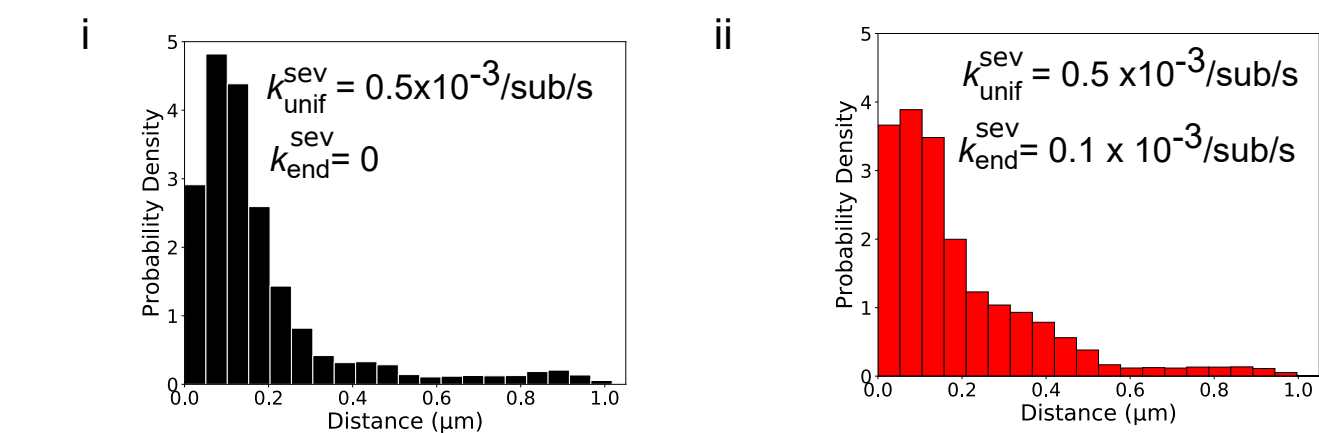

## C Severing to Annealing Distance vs Time

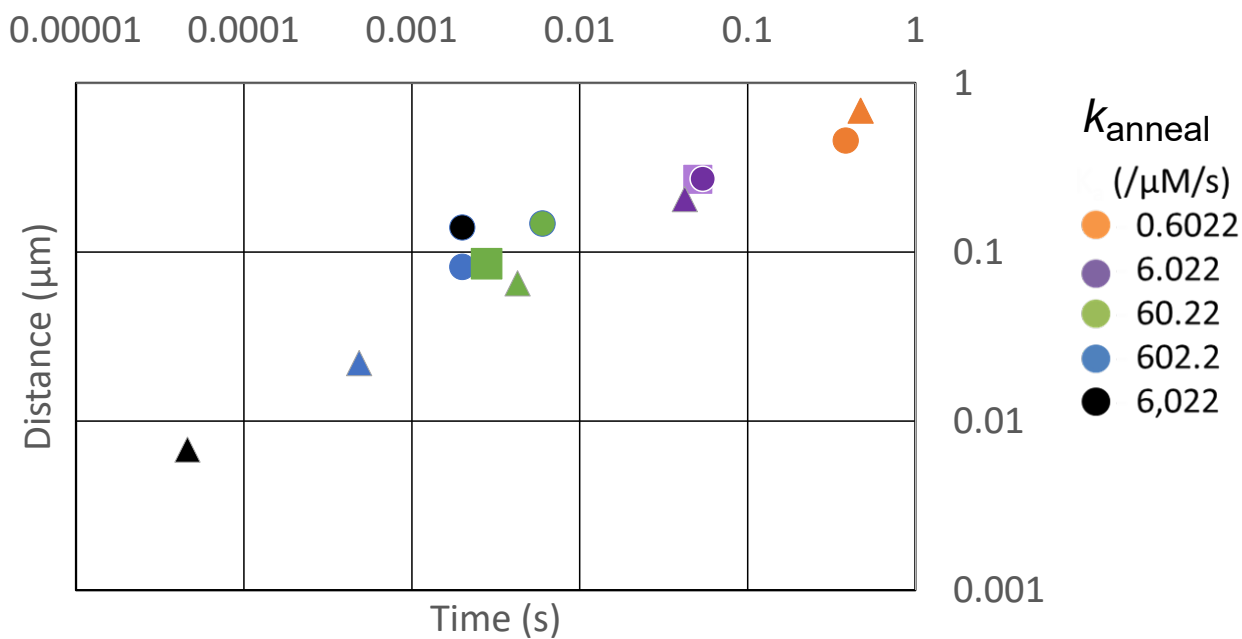

Supplement: supp [file elife-69031-supp-v1.zip]
