# Supplementary material for: A mechanism with severing near barbed ends and annealing explains structure and dynamics of dendritic actin networks
Source: eLife journal article supplement (doi:10.7554/elife.69031), 2022-06-06
Supplement: supp [file elife-69031-supp-v1.zip]

# With Annealing, XTC Parameters

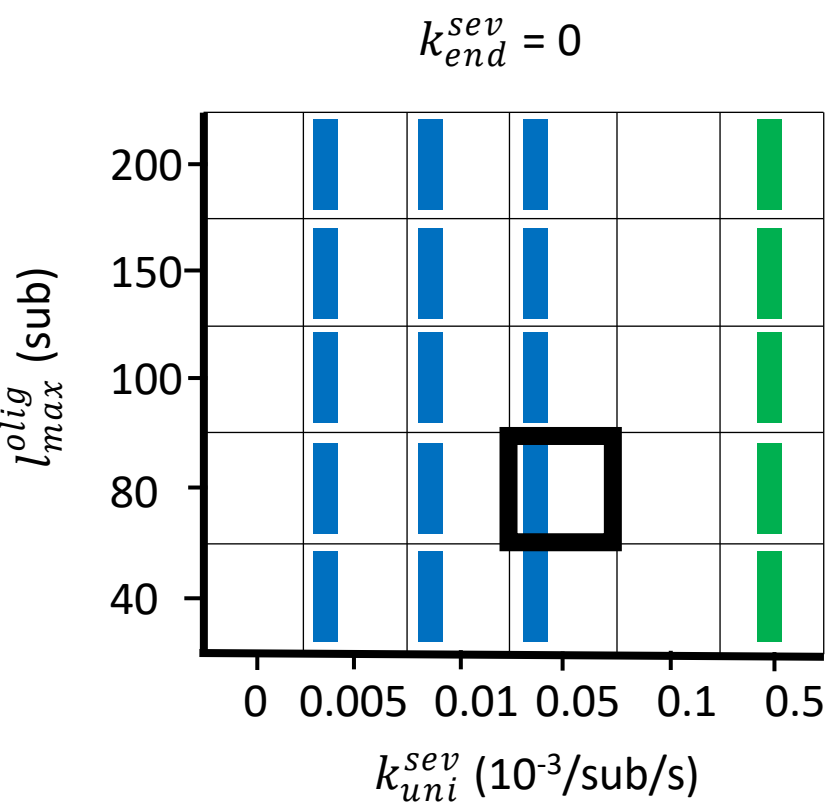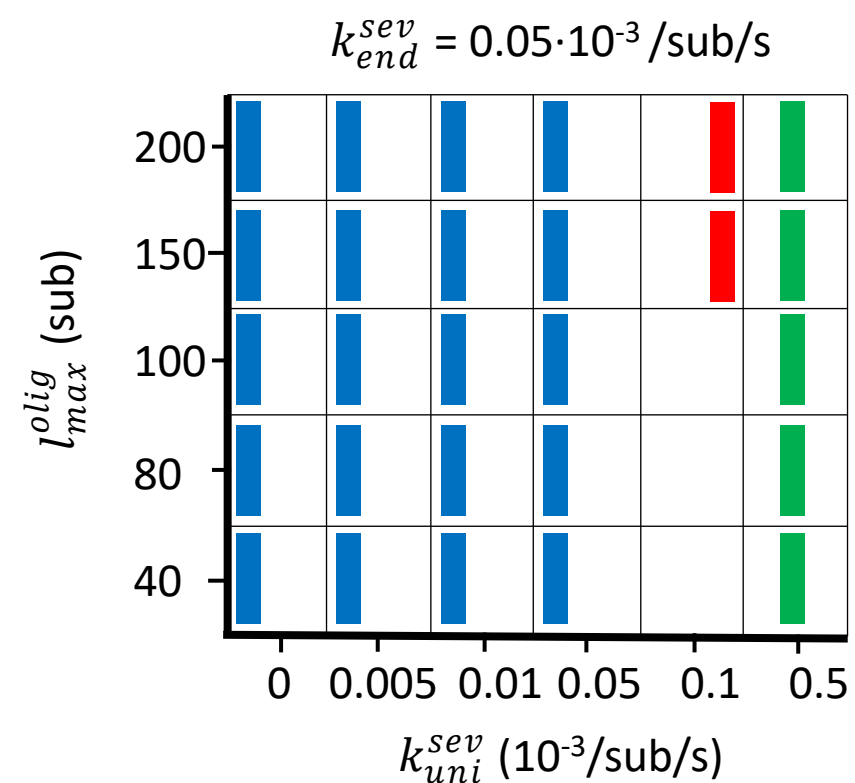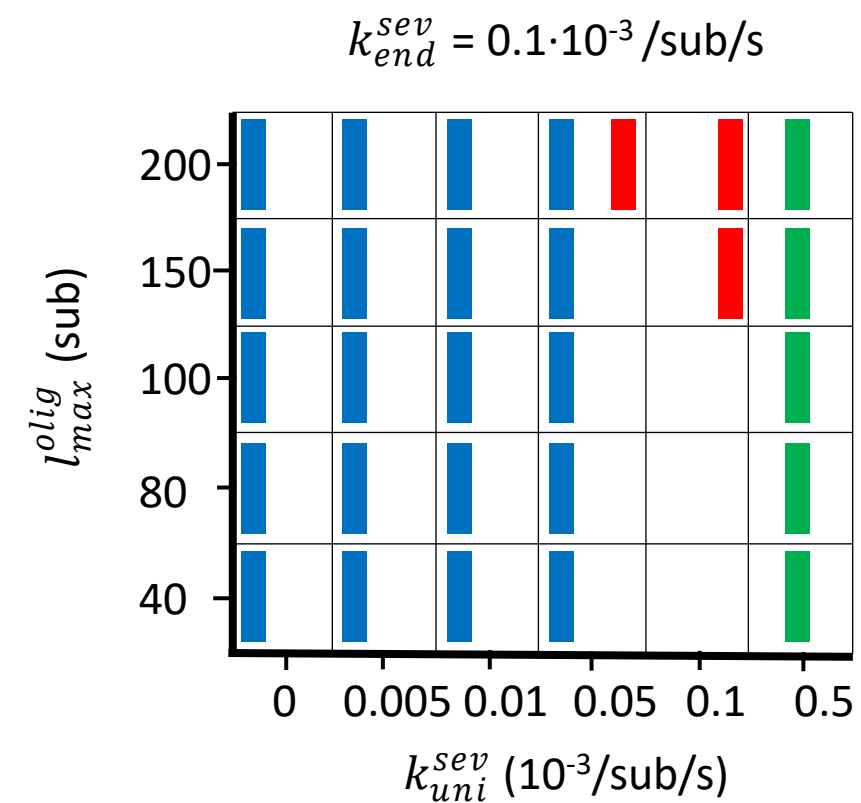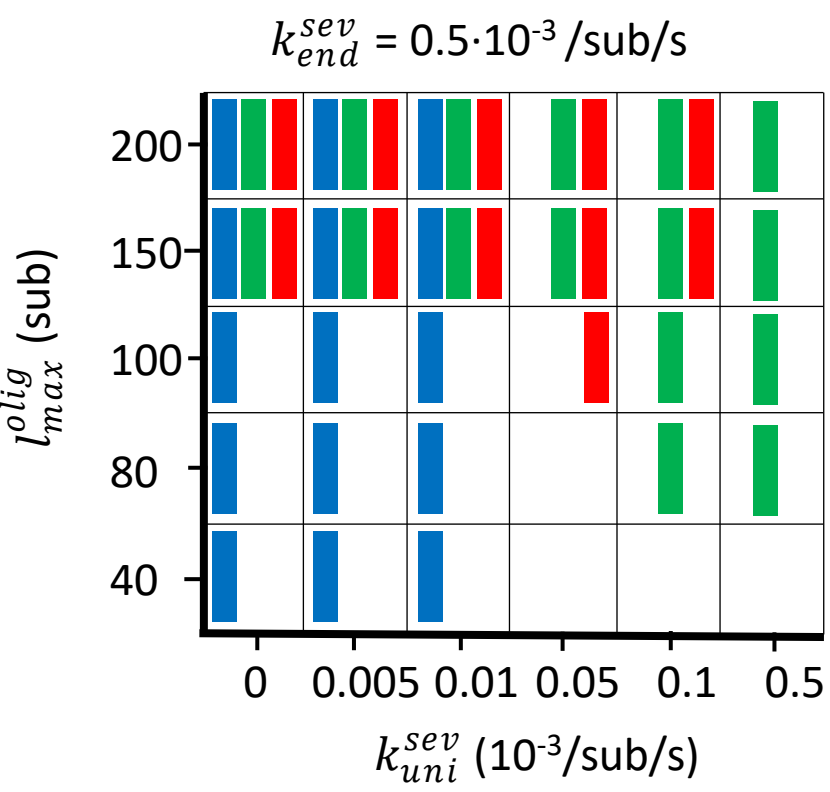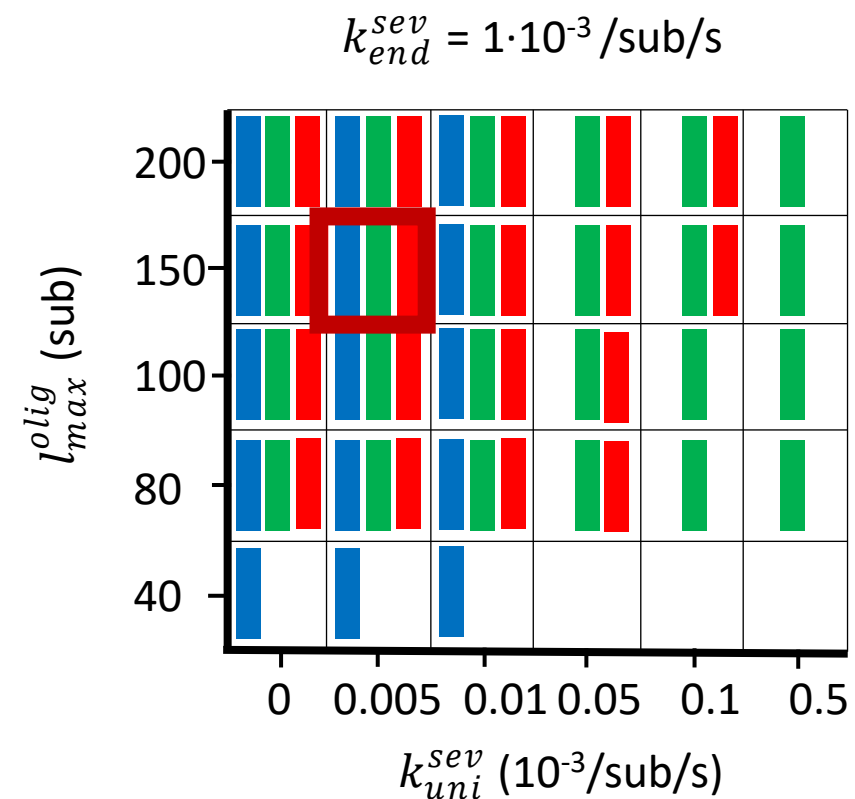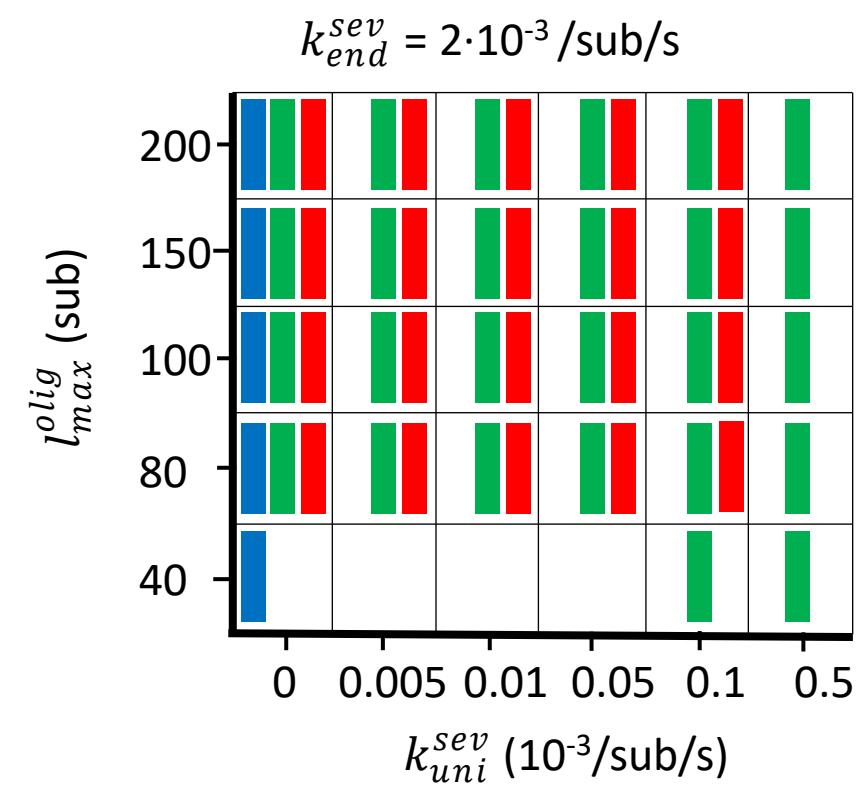

- Matches F-actin structure and concentration
- Matches actin speckle lifetime distribution
- Increase in actin filament length away from lead. edge
