# Supplementary material for: A mechanism with severing near barbed ends and annealing explains structure and dynamics of dendritic actin networks
Source: eLife journal article supplement (doi:10.7554/elife.69031), 2022-06-06

A

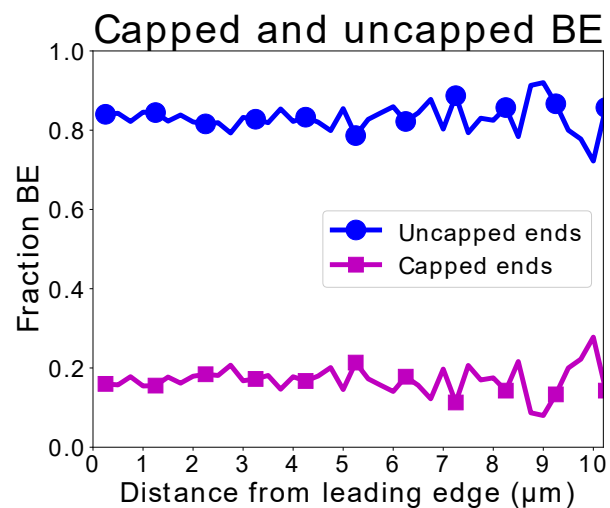

B

## Uniform severing

### Oligomer size distribution

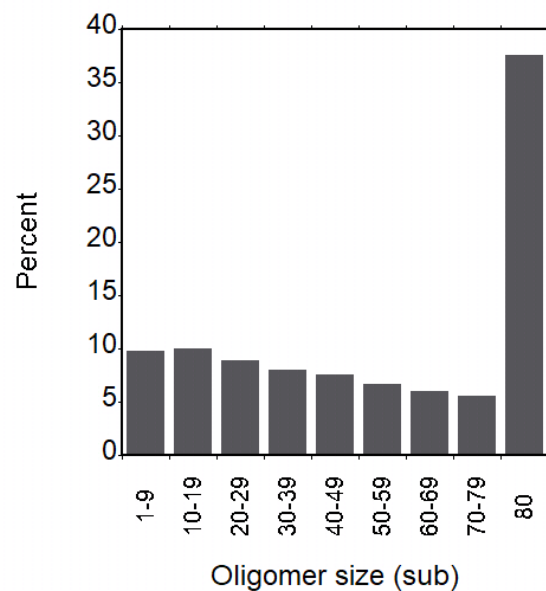

C

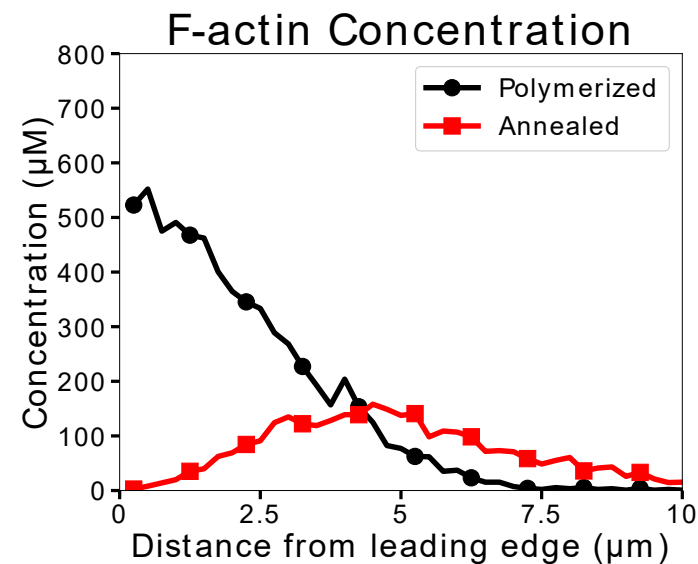

D

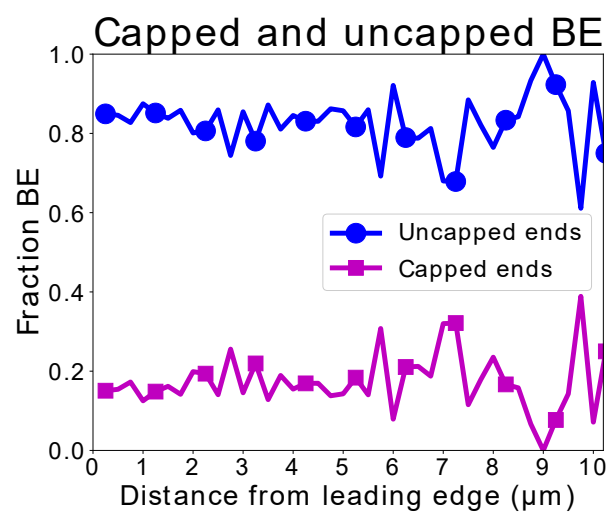

E

## Enhanced end severing

### Oligomer size distribution

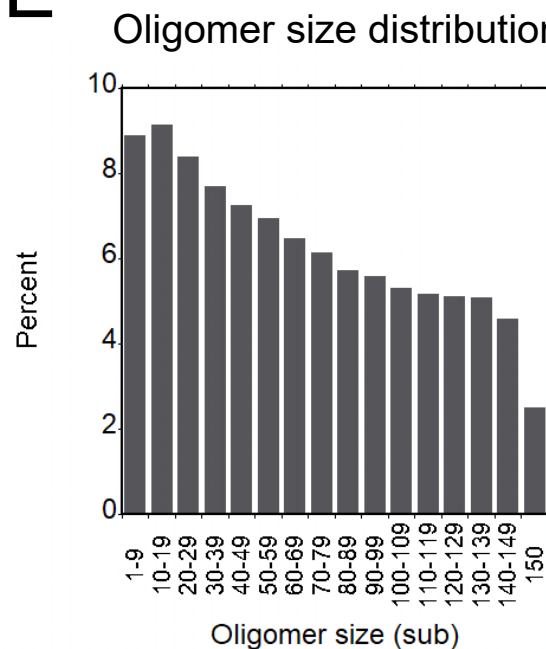

F

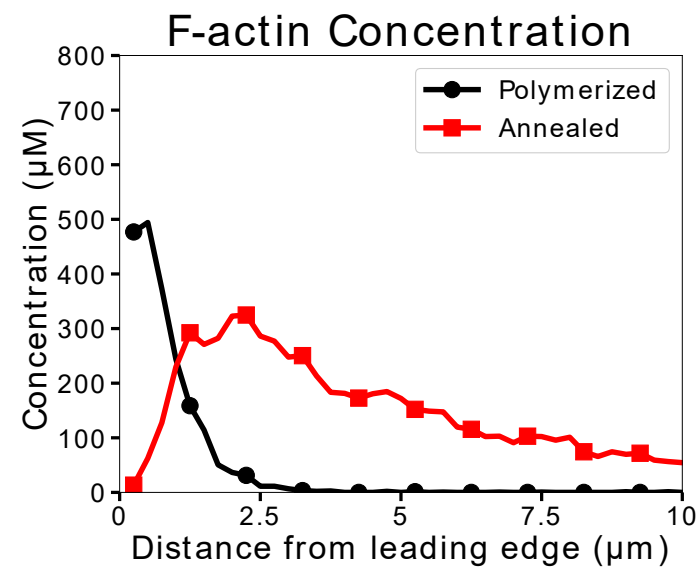

Supplement: supp [file elife-69031-supp-v1.zip]
