# Supplementary material for: A mechanism with severing near barbed ends and annealing explains structure and dynamics of dendritic actin networks
Source: eLife journal article supplement (doi:10.7554/elife.69031), 2022-06-06
Supplement: supp [file elife-69031-supp-v2.zip]

Archive with 24 entries (24 files):
- elife_poa_e69031_Transparent_Reporting_File.docx
- elife_poa_e69031_Video_1.mov
- elife_poa_e69031_Video_2.mov
- elife_poa_e69031_Video_3.mov
- elife_poa_e69031_Video_4.mov
- elife_poa_e69031_Video_5.mov
- elife_poa_e69031_Video_6.mov
- elife_poa_e69031_Figure_1_figure_supplement_1.pdf
- elife_poa_e69031_Figure_2_figure_supplement_1.pdf
- elife_poa_e69031_Figure_3_figure_supplement_1.pdf
- elife_poa_e69031_Figure_3_figure_supplement_2.pdf
- elife_poa_e69031_Figure_4_figure_supplement_1.pdf
- elife_poa_e69031_Figure_4_figure_supplement_2.pdf
- elife_poa_e69031_Figure_4_figure_supplement_3.pdf
- elife_poa_e69031_Figure_4_figure_supplement_4.pdf
- elife_poa_e69031_Figure_5_figure_supplement_1.pdf
- elife_poa_e69031_Figure_5_figure_supplement_2.pdf
- elife_poa_e69031_Figure_5_figure_supplement_3.pdf
- elife_poa_e69031_Figure_5_figure_supplement_4.pdf
- elife_poa_e69031_Figure_5_figure_supplement_5.pdf
- elife_poa_e69031_Figure_6_figure_supplement_1.pdf
- elife_poa_e69031_Figure_6_source_data_1.xlsx
- elife_poa_e69031_Figure_6_source_data_2.xlsx
- elife_poa_e69031_Figure_6_figure_supplement_1_source_data_1.xlsx
