# Supplementary material for: A mechanism with severing near barbed ends and annealing explains structure and dynamics of dendritic actin networks
Source: eLife journal article supplement (doi:10.7554/elife.69031), 2022-06-06
Supplement: supp [file elife-69031-supp-v2.zip › elife_poa_e69031_Figure_6_figure_supplement_1_source_data_1.xlsx]

## Sheet: Sheet1
	lamellipodia								lamella
	location		frame number starting from fr. 35	time after fr. 34 (frame)	frequency of speckles which disappeared at the next frame	time (s)	number of remaining speckles at each timepoint		location		frame number starting from fr. 35	time after fr. 34 (frame)	frequency of speckles which disappeared at the next frame	time (s)	number of remaining speckles at each timepoint
	x	y							x	y
	#%start speckle%			1	7	0	56		#%start speckle%			1	6	0	70
	104.375	160.312	1	2	7	0.2	49		255.952	19.7619	1	2	1	0.2	64
	104.062	160.312	2	3	6	0.4	42		255.476	22.381	2	3	1	0.4	63
	105.312	160.312	3	4	3	0.6	36		255.476	21.1905	3	4	3	0.6	62
	105.625	160.938	4	5	4	0.8	33		255.476	21.4286	4	5	2	0.8	59
	#%stop speckle%			6	0	1	29		255.714	21.6667	5	6	1	1	57
	#%start speckle%			7	2	1.2	29		256.19	22.381	6	7	1	1.2	56
	127.812	73.125	1	8	2	1.4	27		256.19	22.381	7	8	2	1.4	55
	128.125	72.1875	2	9	2	1.6	25		256.19	22.381	8	9	0	1.6	53
	128.125	72.1875	3	10	3	1.8	23		256.19	22.381	9	10	2	1.8	53
	128.125	72.1875	4	11	3	2	20		256.19	22.381	10	11	1	2	51
	128.125	71.875	5	12	0	2.2	17		256.905	22.619	11	12	1	2.2	50
	128.125	71.875	6	13	3	2.4	17		256.905	22.8571	12	13	1	2.4	49
	128.125	71.875	7	14	0	2.6	14		256.905	22.8571	13	14	1	2.6	48
	128.125	71.875	8	15	0	2.8	14		256.429	22.619	14	15	0	2.8	47
	128.125	71.875	9	16	1	3	14		256.429	22.619	15	16	1	3	47
	128.125	71.875	10	17	1	3.2	13		256.429	22.619	16	17	2	3.2	46
	128.75	71.875	11	18	1	3.4	12		256.429	22.619	17	18	1	3.4	44
	129.062	72.5	12	19	2	3.6	11		256.429	22.619	18	19	0	3.6	43
	128.75	72.5	13	20	0	3.8	9		256.429	22.619	19	20	1	3.8	43
	128.75	72.5	14	21	0	4	9		256.429	22.619	20	21	1	4	42
	128.75	72.5	15	22	0	4.2	9		256.429	22.619	21	22	0	4.2	41
	129.375	73.125	16	23	1	4.4	9		256.429	22.619	22	23	0	4.4	41
	129.375	73.4375	17	24	0	4.6	8		256.429	22.8571	23	24	0	4.6	41
	129.375	73.4375	18	25	0	4.8	8		256.429	22.8571	24	25	0	4.8	41
	129.375	73.4375	19	26	0	5	8		256.429	23.0952	25	26	0	5	41
	129.375	73.4375	20	27	0	5.2	8		256.429	23.0952	26	27	1	5.2	41
	129.375	73.4375	21	28	0	5.4	8		256.429	23.0952	27	28	1	5.4	40
	129.375	73.4375	22	29	0	5.6	8		256.429	23.0952	28	29	0	5.6	39
	129.375	73.4375	23	30	0	5.8	8		256.429	23.0952	29	30	0	5.8	39
	130	74.375	24	31	0	6	8		256.429	23.0952	30	31	0	6	39
	130	74.375	25	32	0	6.2	8		256.429	23.0952	31	32	0	6.2	39
	130	74.375	26	33	2	6.4	8		256.429	23.5714	32	33	0	6.4	39
	129.375	73.4375	27	34	0	6.6	6		257.381	24.0476	33	34	0	6.6	39
	130	73.75	28	35	0	6.8	6		257.381	24.0476	34	35	0	6.8	39
	130	73.75	29	36	0	7	6		257.381	24.0476	35	36	2	7	39
	130	73.75	30	37	0	7.2	6		257.381	24.0476	36	37	1	7.2	37
	130.938	73.75	31	38	0	7.4	6		257.857	24.2857	37	38	1	7.4	36
	130.625	74.0625	32	39	0	7.6	6		257.857	24.5238	38	39	1	7.6	35
	130.625	74.0625	33	40	0	7.8	6		257.619	25.2381	39	40	0	7.8	34
	130.625	74.0625	34	41>	6	8	6		257.143	23.5714	40	41>	34	8	34
	130.625	74.0625	35						257.857	24.2857	41
	130.625	74.0625	36						260.476	22.8571	42
	130.938	74.0625	37						259.762	22.8571	43
	130.938	74.0625	38						259.762	22.8571	44
	130.938	73.75	39						259.762	22.8571	45
	130.938	73.75	40						259.762	22.8571	46
	130.938	73.4375	41						259.762	22.8571	47
	131.25	73.125	42						259.762	23.8095	48
	131.25	73.125	43						259.762	23.8095	49
	131.25	73.75	44						259.762	23.8095	50
	130.938	74.0625	45						261.19	24.0476	51
	132.188	74.0625	46						260.952	24.0476	52
	131.875	73.125	47						260.714	24.2857	53
	132.812	73.75	48						260.714	24.2857	54
	#%stop speckle%								261.429	23.0952	55
	#%start speckle%								261.19	23.3333	56
	132.333	239	1						260.714	23.3333	57
	131.667	242	2						259.286	23.3333	58
	130.333	240.667	3						261.19	23.3333	59
	130.333	240.667	4						261.667	23.8095	60
	131	238.667	5						261.905	24.5238	61
	132.333	240	6						261.905	24.5238	62
	132.333	240	7						262.143	25.2381	63
	132.333	240	8						262.143	25.2381	64
	132	239.667	9						262.619	25	65
	132	239.667	10						263.095	24.2857	66
	132	239.667	11						#%stop speckle%
	132	239.667	12						#%start speckle%
	132	239.667	13						208.056	184.722	1
	132	239.667	14						208.056	183.889	2
	132	239.667	15						208.056	183.889	3
	132	239.667	16						208.611	183.056	4
	132	238.667	17						208.611	183.056	5
	132.333	239.667	18						208.611	183.056	6
	132.667	239.667	19						208.611	183.056	7
	132.667	239.667	20						208.889	182.778	8
	132.667	239.667	21						208.889	182.778	9
	132.667	239.667	22						208.889	182.778	10
	132.667	239.667	23						208.889	182.778	11
	132.667	239.667	24						208.889	182.778	12
	132.667	239.667	25						208.889	182.778	13
	132.667	239.667	26						209.167	182.5	14
	132.667	239.667	27						209.167	182.5	15
	132.667	239.667	28						209.167	182.5	16
	132.667	239.667	29						209.167	182.5	17
	132.667	239.667	30						209.167	182.5	18
	132.667	239.667	31						209.722	182.222	19
	132.667	239.667	32						209.722	182.222	20
	132.667	239.667	33						210	182.222	21
	132.667	239.667	34						210	182.222	22
	132.667	239.667	35						210	182.222	23
	132.667	239.667	36						211.667	182.222	24
	132.667	239.667	37						211.667	182.222	25
	132.667	239.667	38						211.667	182.222	26
	133.667	238.333	39						211.667	182.222	27
	133.667	238.333	40						211.667	182.222	28
	133.667	238.333	41						211.667	182.222	29
	134.333	237.667	42						211.667	182.222	30
	134.333	237.667	43						211.667	182.222	31
	134.333	237.667	44						211.667	182.222	32
	134.333	237.667	45						211.667	182.222	33
	134.333	237.667	46						211.667	182.222	34
	134.333	237.667	47						211.667	182.222	35
	134.333	237.667	48						211.944	182.5	36
	134.333	237.667	49						211.944	182.5	37
	134.333	237.667	50						211.944	182.5	38
	134.333	237.667	51						211.944	182.5	39
	134.333	237.667	52						213.056	182.222	40
	135.333	237	53						213.056	183.056	41
	135.333	237	54						#%stop speckle%
	135.333	237	55						#%start speckle%
	135.333	237	56						200.238	110.476	1
	135.333	237	57						200.952	110	2
	135.667	237	58						200.952	110	3
	135.333	237	59						200.714	110.476	4
	135.333	237	60						202.143	110.952	5
	135.333	237	61						202.619	110.476	6
	136	237	62						202.143	109.048	7
	136	237	63						204.048	109.762	8
	136	237	64						#%stop speckle%
	136.333	237	65						#%start speckle%
	136.333	237	66						255.714	53.5714	1
	#%stop speckle%								255.714	54.2857	2
	#%start speckle%								255.714	54.2857	3
	85.625	147.5	1						255.714	53.8095	4
	85.9375	147.188	2						255.714	53.8095	5
	85.9375	147.5	3						255.714	52.381	6
	87.1875	147.5	4						255.714	53.0952	7
	#%stop speckle%								255.714	53.0952	8
	#%start speckle%								255.714	53.0952	9
	112.188	181.25	1						255.714	53.0952	10
	111.562	180.938	2						255.952	53.5714	11
	111.562	180.938	3						256.429	54.0476	12
	111.875	181.562	4						256.429	54.0476	13
	111.875	182.188	5						256.429	54.0476	14
	111.875	180.625	6						257.143	53.0952	15
	112.5	180.938	7						257.381	55.2381	16
	113.125	180.938	8						257.619	55	17
	113.125	181.25	9						257.381	55.2381	18
	112.188	181.875	10						256.905	54.5238	19
	#%stop speckle%								257.143	54.5238	20
	#%start speckle%								257.143	54.7619	21
	119.333	201.667	1						257.143	54.7619	22
	119	202.333	2						257.857	53.8095	23
	#%stop speckle%								258.333	54.2857	24
	#%start speckle%								258.81	54.2857	25
	114.667	210	1						259.048	55.2381	26
	115.333	209.667	2						258.571	55.2381	27
	115.333	210	3						258.333	54.2857	28
	116	209.667	4						258.81	54.2857	29
	115.667	209.333	5						258.333	55	30
	116	209.333	6						258.095	55	31
	116.667	208.667	7						258.095	55.9524	32
	117.667	208.333	8						258.095	56.1905	33
	116.667	208	9						258.333	56.1905	34
	#%stop speckle%								258.333	56.4286	35
	#%start speckle%								257.857	57.381	36
	152.333	34.6667	1						256.429	58.3333	37
	151.667	34.3333	2						255.714	59.0476	38
	152.333	33.3333	3						#%stop speckle%
	153.667	32.3333	4						#%start speckle%
	153.667	32.6667	5						158.889	241.944	1
	#%stop speckle%								157.778	241.389	2
	#%start speckle%								159.167	241.667	3
	161.333	75.3333	1						159.167	241.667	4
	160.333	75.3333	2						159.167	241.667	5
	160.333	75.3333	3						159.167	241.667	6
	160.333	75.3333	4						159.167	241.667	7
	161.333	76	5						159.167	241.667	8
	161.333	76	6						159.167	241.667	9
	161.333	76	7						159.444	241.111	10
	161.333	76	8						159.444	241.111	11
	161	76.3333	9						159.444	241.111	12
	161	76.3333	10						159.444	241.111	13
	161	76.3333	11						159.444	241.111	14
	161	76.3333	12						159.444	241.111	15
	161	76.3333	13						159.444	241.111	16
	161	76.3333	14						159.444	240.556	17
	161.667	76.3333	15						#%stop speckle%
	162.667	76	16						#%start speckle%
	163.333	76	17						258.611	32.5	1
	163.333	76	18						#%stop speckle%
	163.333	76	19						#%start speckle%
	163.333	76	20						210.278	116.944	1
	163.333	76	21						210.556	116.944	2
	163.333	76	22						211.389	116.944	3
	163.333	76	23						211.389	116.944	4
	163.667	76	24						211.389	116.944	5
	163.667	76	25						211.389	116.944	6
	163.667	76	26						211.389	116.944	7
	163.333	75.6667	27						211.944	116.944	8
	164.667	75	28						211.944	116.944	9
	164.333	75.6667	29						211.944	116.944	10
	164.333	75.6667	30						212.5	117.222	11
	164.333	76	31						213.056	117.222	12
	165.333	76.6667	32						213.056	117.222	13
	165.333	76	33						213.611	116.944	14
	#%stop speckle%								213.889	118.333	15
	#%start speckle%								214.444	118.056	16
	96	167	1						213.889	118.056	17
	#%stop speckle%								213.333	117.778	18
	#%start speckle%								213.333	117.5	19
	110.667	54.6667	1						214.167	117.5	20
	113.333	54.6667	2						214.167	117.5	21
	#%stop speckle%								214.167	117.5	22
	#%start speckle%								214.167	117.5	23
	126	142	1						214.167	117.5	24
	127	141	2						214.167	117.5	25
	127	141	3						214.722	117.778	26
	127	141	4						214.722	117.778	27
	127	140.667	5						214.722	117.778	28
	126.333	141.333	6						214.722	117.778	29
	127	141.333	7						214.722	117.778	30
	127	141.333	8						214.722	117.778	31
	126.667	141.333	9						214.722	117.778	32
	126.667	141.333	10						214.722	117.778	33
	126.667	141.333	11						215.278	118.333	34
	125.333	140.333	12						215.278	118.056	35
	126.333	139.333	13						215.278	117.5	36
	126.333	139.333	14						215.278	117.5	37
	126.333	139.333	15						215.556	117.778	38
	126.333	139.333	16						215.278	116.944	39
	126.333	139.333	17						216.111	116.944	40
	126.333	139.333	18						216.111	116.944	41
	126	139.333	19						216.667	117.778	42
	126	139.333	20						216.944	117.778	43
	126	139.333	21						217.5	117.778	44
	126	139.333	22						217.778	117.778	45
	126	139.333	23						218.333	117.778	46
	126	139.333	24						218.333	118.333	47
	125.667	139.667	25						218.611	116.667	48
	128.333	140.333	26						219.167	116.389	49
	128.667	140	27						219.167	116.667	50
	128.667	140	28						220	116.944	51
	129	140.333	29						220.556	116.944	52
	129	140.333	30						221.667	116.944	53
	129	140.333	31						221.667	116.667	54
	130	141	32						222.5	115.556	55
	129.667	141.333	33						222.222	116.667	56
	130.667	141.667	34						222.778	116.944	57
	131	141.667	35						221.389	116.944	58
	131	141.667	36						221.389	117.222	59
	131	141.667	37						221.944	116.944	60
	132	142.333	38						221.944	118.611	61
	131.667	140.667	39						221.944	118.889	62
	132.333	141.333	40						222.778	119.444	63
	132.333	141.333	41						223.056	118.333	64
	132.333	141.333	42						221.944	117.222	65
	132.333	141.333	43						222.222	117.5	66
	132.333	141.333	44						#%stop speckle%
	132.333	141.333	45						#%start speckle%
	132.333	141	46						227.5	84.4444	1
	132.333	141	47						226.944	83.3333	2
	132.333	141	48						227.5	83.6111	3
	132.333	141	49						227.222	83.3333	4
	132.333	141	50						227.222	83.3333	5
	132.333	141	51						227.222	83.3333	6
	132.333	141	52						227.222	83.3333	7
	132.667	141.333	53						227.222	83.3333	8
	132.667	141.333	54						227.222	83.3333	9
	133	142.667	55						227.222	83.3333	10
	133	142	56						227.222	83.3333	11
	133.333	143	57						227.222	83.3333	12
	133.333	143	58						227.5	83.3333	13
	133.333	143	59						228.056	83.6111	14
	133.333	143	60						228.056	83.6111	15
	134	143	61						228.056	83.6111	16
	134	143	62						228.056	83.6111	17
	134.667	143.333	63						228.056	83.6111	18
	135	142	64						228.056	83.6111	19
	134	141	65						228.056	83.6111	20
	135	142	66						228.056	83.6111	21
	#%stop speckle%								228.056	83.6111	22
	#%start speckle%								228.056	83.6111	23
	141.333	61.3333	1						228.056	83.6111	24
	142	62	2						228.056	83.6111	25
	#%stop speckle%								228.056	83.6111	26
	#%start speckle%								228.889	84.1667	27
	98.125	159.375	1						228.611	83.8889	28
	99.0625	159.062	2						228.611	83.8889	29
	99.0625	159.062	3						228.611	83.8889	30
	#%stop speckle%								228.889	83.8889	31
	#%start speckle%								230	83.6111	32
	112.667	163.667	1						230	83.6111	33
	112	163.333	2						230	83.6111	34
	112.667	164.667	3						230.278	83.3333	35
	#%stop speckle%								230.278	83.3333	36
	#%start speckle%								230.278	83.3333	37
	127.667	228.333	1						230.278	83.3333	38
	128.667	228.333	2						230.278	83.3333	39
	128.667	228.667	3						230.278	83.3333	40
	128.667	228.667	4						230.278	83.3333	41
	128.333	229	5						230.278	83.0556	42
	128.333	229	6						230.278	83.0556	43
	128.333	229	7						230.278	83.0556	44
	128.333	229	8						230.278	83.0556	45
	128.333	229	9						230.556	82.7778	46
	129.667	229.333	10						231.667	83.3333	47
	129.667	229.667	11						231.667	83.3333	48
	130	230	12						232.222	83.0556	49
	130	229.667	13						232.5	83.0556	50
	131	229	14						232.5	83.0556	51
	130.333	228.333	15						232.5	83.0556	52
	130.333	228.333	16						232.5	83.0556	53
	130.333	228.333	17						232.5	83.0556	54
	130.333	228.333	18						232.5	83.0556	55
	130.333	228.333	19						232.5	83.0556	56
	130.333	228.333	20						232.5	83.0556	57
	130.333	228.333	21						232.5	83.0556	58
	130.333	229	22						232.5	82.5	59
	131.667	230	23						233.333	82.5	60
	131.333	229.333	24						233.333	82.5	61
	132.667	229	25						233.333	82.7778	62
	131.333	229.333	26						233.056	82.7778	63
	131.333	229.333	27						233.056	82.7778	64
	131.333	229.333	28						233.056	82.7778	65
	131.333	229.333	29						233.611	83.8889	66
	131.667	229.333	30						#%stop speckle%
	131.667	229.333	31						#%start speckle%
	131.667	229.333	32						196.111	150.833	1
	132.333	229.667	33						195.556	150.278	2
	#%stop speckle%								196.111	150.556	3
	#%start speckle%								196.111	150	4
	111	256.667	1						196.111	150	5
	111.667	255	2						196.111	150	6
	111.667	255	3						196.111	150	7
	111.667	254.667	4						196.111	150	8
	111.667	254.667	5						196.944	150.556	9
	112	254.333	6						196.667	150	10
	111.333	254.333	7						197.5	150	11
	112.333	254	8						197.5	150	12
	112.333	253.333	9						197.5	150	13
	#%stop speckle%								198.056	150.278	14
	#%start speckle%								198.889	150.556	15
	99	251	1						198.889	150.556	16
	98.6667	249.333	2						198.056	150.278	17
	99	249	3						198.889	150.833	18
	99	249	4						200.278	151.389	19
	99	249	5						200.278	151.389	20
	#%stop speckle%								200	150.556	21
	#%start speckle%								200	148.889	22
	104.062	254.375	1						198.611	148.889	23
	103.75	253.75	2						199.722	149.167	24
	103.75	253.438	3						199.167	149.444	25
	103.438	253.125	4						200	149.444	26
	103.75	252.812	5						199.444	149.444	27
	#%stop speckle%								199.444	149.444	28
	#%start speckle%								200	148.056	29
	147	30	1						199.167	149.444	30
	146.667	31.3333	2						199.167	149.444	31
	#%stop speckle%								200.278	149.167	32
	#%start speckle%								200.278	149.167	33
	135.938	37.8125	1						200.278	149.167	34
	135.625	37.1875	2						200.278	149.167	35
	135.625	37.1875	3						200.278	149.167	36
	136.25	37.5	4						200.278	149.167	37
	136.25	37.5	5						200.278	149.167	38
	136.25	38.4375	6						200.278	149.167	39
	136.25	38.4375	7						200.278	149.167	40
	136.25	38.4375	8						200.278	149.167	41
	136.25	38.4375	9						200.278	149.167	42
	136.25	38.4375	10						200	149.444	43
	136.25	38.4375	11						200	149.444	44
	137.188	39.0625	12						200	149.444	45
	137.5	38.75	13						200	149.444	46
	137.188	38.75	14						199.444	150	47
	137.188	38.75	15						199.167	150.556	48
	137.188	39.0625	16						199.167	150.556	49
	137.188	39.0625	17						199.167	150.556	50
	#%stop speckle%								199.167	150.556	51
	#%start speckle%								199.167	150.556	52
	115.333	173.333	1						199.167	150.556	53
	114.333	174.333	2						199.167	150.556	54
	114.667	173.333	3						199.167	150.556	55
	115	173	4						199.444	150.833	56
	114	173.333	5						199.722	151.111	57
	115	173.667	6						200	150.556	58
	115	173.667	7						200	150.556	59
	115	173	8						200	150.556	60
	115.333	173	9						200	150.556	61
	115.333	173	10						200	150.556	62
	116	173.333	11						199.444	151.389	63
	117	173.667	12						199.167	150.556	64
	116.333	172.667	13						199.167	150.556	65
	116	173	14						199.444	151.111	66
	116	173.333	15						#%stop speckle%
	116.333	173	16						#%start speckle%
	#%stop speckle%								152.778	187.222	1
	#%start speckle%								154.167	188.889	2
	98.6667	206.333	1						153.889	188.333	3
	98.3333	207.333	2						153.889	188.333	4
	97.6667	207.667	3						153.889	188.333	5
	98.3333	207.333	4						154.167	188.889	6
	99.3333	207.667	5						154.167	188.889	7
	99.3333	207.667	6						154.167	188.889	8
	99.3333	207.667	7						154.167	188.889	9
	99	207.333	8						154.167	188.889	10
	98	208	9						154.167	188.889	11
	99	207	10						154.167	188.889	12
	#%stop speckle%								154.167	188.889	13
	#%start speckle%								154.167	188.889	14
	115.333	121	1						154.167	188.889	15
	114	121.667	2						154.167	188.889	16
	113.667	121.667	3						154.167	188.889	17
	114	121	4						154.167	188.889	18
	116.333	121.333	5						154.444	188.611	19
	117	122	6						153.889	187.5	20
	116	121.333	7						153.889	187.5	21
	#%stop speckle%								154.444	187.5	22
	#%start speckle%								154.444	187.5	23
	98.75	196.562	1						154.444	187.5	24
	98.4375	195.625	2						154.444	187.5	25
	99.375	196.562	3						154.444	187.5	26
	98.75	196.25	4						154.444	187.5	27
	98.75	196.25	5						154.444	187.5	28
	99.6875	198.125	6						154.444	187.5	29
	99.0625	196.562	7						154.167	187.222	30
	99.0625	196.875	8						154.167	187.222	31
	99.375	196.25	9						154.167	187.222	32
	99.0625	196.562	10						154.167	187.222	33
	100.312	196.562	11						154.167	187.222	34
	100.625	196.562	12						154.167	187.222	35
	101.25	196.562	13						154.167	187.222	36
	100	196.25	14						154.167	187.222	37
	100.625	197.812	15						154.167	187.222	38
	100	196.875	16						154.167	187.222	39
	100.938	195.938	17						154.167	187.222	40
	101.562	196.25	18						154.167	187.222	41
	100.938	196.25	19						154.167	187.222	42
	#%stop speckle%								154.167	187.222	43
	#%start speckle%								154.167	187.222	44
	134	61	1						154.167	187.222	45
	134	62	2						154.722	187.5	46
	133.667	61.6667	3						156.389	187.5	47
	#%stop speckle%								155.556	188.611	48
	#%start speckle%								155.556	188.611	49
	119.333	258.333	1						155.833	188.333	50
	119.333	259	2						155.833	188.056	51
	119.667	259	3						155.833	188.056	52
	120.333	259	4						155.833	188.056	53
	121	258.333	5						156.389	186.944	54
	121.333	257.333	6						156.389	187.222	55
	121.333	257	7						156.389	187.222	56
	121	257.333	8						156.389	187.222	57
	121.333	258	9						156.389	187.222	58
	121.667	257.333	10						156.389	187.222	59
	121.667	256.667	11						156.389	187.222	60
	121.667	256.667	12						156.389	187.222	61
	121	257.667	13						157.5	187.5	62
	121.667	257.333	14						157.222	187.222	63
	121.667	257	15						157.222	187.222	64
	121.667	257	16						157.222	187.222	65
	121.667	257	17						157.222	187.222	66
	122	256.667	18						#%stop speckle%
	122	256.667	19						#%start speckle%
	123.333	256	20						162.619	213.095	1
	123.333	256	21						162.619	211.905	2
	123.333	256	22						#%stop speckle%
	123.333	256	23						#%start speckle%
	123.333	256	24						193.571	214.286	1
	123.333	256.333	25						192.381	213.81	2
	124.333	256	26						192.143	214.524	3
	124.333	256	27						193.81	214.286	4
	124.333	256	28						194.048	214.524	5
	124.333	256	29						194.048	214.524	6
	124	257	30						195.476	214.286	7
	124.667	256.667	31						195	213.81	8
	124.667	256	32						194.286	213.81	9
	124.667	256	33						194.524	215	10
	124.667	256	34						194.762	214.286	11
	124.667	256	35						194.524	214.524	12
	124.667	256	36						194.048	214.286	13
	125	255.667	37						#%stop speckle%
	125.667	256	38						#%start speckle%
	126.333	255.667	39						235.714	182.619	1
	127.667	255	40						234.762	181.905	2
	127.667	255	41						234.762	181.905	3
	127.667	255	42						234.762	181.905	4
	127.667	255	43						234.762	181.905	5
	128.333	255.667	44						234.762	181.905	6
	128.333	255.333	45						235	181.905	7
	128.333	255.333	46						236.429	181.905	8
	128.667	255.333	47						236.429	181.905	9
	128.333	254.333	48						236.429	181.905	10
	129	255	49						236.429	181.905	11
	128.667	254.667	50						236.429	181.905	12
	129.333	253.667	51						236.667	181.905	13
	129.333	254	52						236.667	181.905	14
	128.667	253.667	53						237.143	181.905	15
	129	254.333	54						237.143	181.667	16
	128	254.333	55						237.857	181.905	17
	129	254.333	56						237.143	181.19	18
	129.333	253	57						237.143	181.19	19
	129.333	253	58						237.143	181.19	20
	130	253.333	59						237.143	181.19	21
	130.333	253	60						237.143	181.19	22
	130.667	253	61						237.143	181.19	23
	130.667	253.667	62						237.143	181.19	24
	131.333	254	63						237.857	180.952	25
	130.333	254.333	64						237.857	180.952	26
	130.333	254.667	65						237.857	180.952	27
	130.333	254.333	66						237.857	180.952	28
	#%stop speckle%								237.857	180.952	29
	#%start speckle%								237.857	180.952	30
	164.667	61.3333	1						237.857	180.952	31
	164.333	63	2						237.857	180.952	32
	164	63	3						237.857	180.952	33
	#%stop speckle%								238.095	181.19	34
	#%start speckle%								238.095	181.19	35
	97.5	110.938	1						238.095	181.19	36
	96.875	111.875	2						238.81	180.952	37
	97.5	111.562	3						239.048	180.714	38
	98.4375	111.562	4						239.048	180.714	39
	98.125	112.812	5						239.048	180.714	40
	98.125	111.875	6						239.048	180.238	41
	98.4375	111.875	7						239.048	180.238	42
	97.5	111.562	8						239.048	180.238	43
	#%stop speckle%								239.286	180.714	44
	#%start speckle%								239.524	180.952	45
	87.5	259.375	1						239.524	180.952	46
	86.5625	258.438	2						239.524	180.952	47
	85.9375	258.125	3						239.524	180.952	48
	85.625	256.875	4						239.286	180.952	49
	88.75	255.312	5						239.286	180.952	50
	88.4375	255.938	6						239.286	180.952	51
	88.125	255.312	7						239.286	180.952	52
	88.4375	254.688	8						239.286	180.952	53
	89.0625	254.375	9						239.286	180.952	54
	89.0625	254.062	10						239.286	180.952	55
	89.375	253.75	11						239.286	180.952	56
	89.6875	253.75	12						239.286	180.952	57
	89.6875	254.062	13						239.286	180.952	58
	#%stop speckle%								239.286	180.952	59
	#%start speckle%								239.048	181.19	60
	123.125	35	1						239.048	181.19	61
	122.812	34.6875	2						239.048	181.19	62
	122.812	34.375	3						239.286	181.429	63
	122.812	34.375	4						239.524	181.19	64
	122.188	34.0625	5						240.476	181.19	65
	122.5	34.0625	6						240.476	181.19	66
	122.5	34.0625	7						#%stop speckle%
	122.812	34.0625	8						#%start speckle%
	122.812	34.0625	9						163.333	236.389	1
	124.062	34.6875	10						163.056	235.556	2
	124.688	34.6875	11						162.5	235.556	3
	124.688	35	12						163.889	235.833	4
	125.312	35.9375	13						163.889	235.833	5
	124.688	35	14						163.889	235.833	6
	123.75	34.6875	15						163.333	235.278	7
	125	36.25	16						163.333	235.278	8
	125	36.5625	17						163.056	235	9
	125.625	37.1875	18						163.056	235	10
	125.625	37.8125	19						163.056	235	11
	#%stop speckle%								162.778	234.722	12
	#%start speckle%								162.778	234.722	13
	123.333	265	1						162.778	234.722	14
	123.667	265	2						162.778	234.722	15
	123.667	265	3						164.167	233.889	16
	124	265.333	4						164.167	234.167	17
	123.333	264.667	5						164.722	234.722	18
	123.667	265	6						164.722	234.722	19
	125.333	264.333	7						164.167	235.556	20
	124.333	265	8						164.167	235.556	21
	124.333	264.333	9						164.167	235.556	22
	124	264	10						163.889	234.722	23
	#%stop speckle%								164.444	235	24
	#%start speckle%								164.444	235	25
	92.5	158.125	1						164.444	235	26
	93.125	158.438	2						164.722	234.722	27
	93.125	158.438	3						165.278	235.556	28
	93.125	158.75	4						165.278	235	29
	93.125	158.75	5						165.833	235.556	30
	94.375	157.812	6						165.278	234.444	31
	94.6875	158.438	7						165.556	234.444	32
	94.6875	158.438	8						166.111	235.833	33
	95	158.125	9						166.111	235.278	34
	95	158.125	10						166.111	235.278	35
	95	158.125	11						165.833	234.722	36
	95.3125	158.438	12						166.389	234.722	37
	95.3125	157.5	13						166.111	235.278	38
	96.5625	157.5	14						166.389	234.722	39
	96.5625	157.5	15						166.111	234.444	40
	96.5625	157.188	16						166.111	234.444	41
	96.5625	157.188	17						165.556	234.167	42
	96.5625	157.188	18						166.389	233.889	43
	97.8125	157.5	19						166.389	233.889	44
	98.125	158.125	20						166.389	233.889	45
	98.125	158.125	21						165.833	233.333	46
	98.125	157.188	22						166.667	233.333	47
	97.8125	156.875	23						168.333	233.611	48
	#%stop speckle%								168.056	233.611	49
	#%start speckle%								167.222	233.611	50
	84.3333	172.333	1						167.5	234.167	51
	#%stop speckle%								167.5	234.444	52
	#%start speckle%								167.778	234.722	53
	88.4375	114.062	1						167.222	233.889	54
	88.125	113.75	2						167.222	234.167	55
	88.125	113.438	3						167.222	234.167	56
	88.125	113.438	4						167.222	234.167	57
	88.4375	113.125	5						166.944	234.444	58
	88.4375	112.188	6						166.667	233.611	59
	88.125	112.188	7						167.5	233.333	60
	88.4375	112.5	8						167.5	233.333	61
	88.125	111.875	9						167.778	233.056	62
	88.4375	110.625	10						167.778	233.333	63
	88.75	112.188	11						167.5	233.889	64
	88.4375	111.875	12						168.056	233.333	65
	89.375	111.562	13						167.778	233.333	66
	#%stop speckle%								#%stop speckle%
	#%start speckle%								#%start speckle%
	97.5	178.438	1						196.538	63.4615	1
	97.1875	178.75	2						195.577	60.7692	2
	97.1875	178.75	3						197.115	61.3462	3
	97.1875	178.75	4						197.692	61.7308	4
	#%stop speckle%								197.692	61.7308	5
	#%start speckle%								197.692	61.7308	6
	79.6667	137.667	1						197.885	61.9231	7
	#%stop speckle%								197.692	61.9231	8
	#%start speckle%								197.308	62.6923	9
	67.3333	159.333	1						197.692	62.3077	10
	70.3333	155	2						197.692	62.3077	11
	#%stop speckle%								197.692	62.3077	12
	#%start speckle%								197.692	62.3077	13
	101	237	1						197.692	62.3077	14
	101.333	237.333	2						197.885	62.3077	15
	101.333	237.333	3						197.885	62.3077	16
	101.333	237.333	4						198.269	62.3077	17
	101.333	237.333	5						198.269	62.3077	18
	101.333	237.333	6						198.269	62.3077	19
	101.667	237.667	7						198.269	62.3077	20
	#%stop speckle%								198.269	62.3077	21
	#%start speckle%								198.269	62.3077	22
	83.75	193.438	1						198.269	62.3077	23
	83.125	193.438	2						198.269	62.3077	24
	83.75	193.75	3						199.231	62.6923	25
	83.75	193.75	4						199.231	62.6923	26
	83.75	194.375	5						200.192	61.9231	27
	83.75	194.375	6						200	61.7308	28
	83.4375	194.062	7						200	61.7308	29
	84.375	195	8						200.192	62.1154	30
	#%stop speckle%								200.192	62.1154	31
	#%start speckle%								201.154	62.8846	32
	111.333	264	1						200.962	62.1154	33
	112.667	262	2						200.577	61.3462	34
	113	262.333	3						200.769	61.3462	35
	#%stop speckle%								201.346	61.9231	36
	#%start speckle%								201.346	61.7308	37
	146	90.3333	1						202.308	61.7308	38
	145.667	90.6667	2						201.923	62.1154	39
	146.333	91.6667	3						201.923	62.1154	40
	146.333	91.6667	4						201.923	62.1154	41
	146	91.3333	5						202.5	62.6923	42
	146	91.3333	6						202.308	62.3077	43
	146	91.3333	7						202.308	62.3077	44
	146	91.3333	8						202.308	62.3077	45
	150	91	9						202.308	62.3077	46
	149.333	90	10						202.308	62.3077	47
	150	90.3333	11						202.308	62.3077	48
	150.333	92	12						202.308	62.3077	49
	149	91.3333	13						202.308	62.3077	50
	#%stop speckle%								202.308	62.3077	51
	#%start speckle%								202.308	62.3077	52
	136.667	54	1						202.308	62.3077	53
	137.333	54.6667	2						202.308	62.3077	54
	137.333	54.3333	3						202.308	62.3077	55
	#%stop speckle%								202.308	62.3077	56
	#%start speckle%								203.654	61.3462	57
	113.125	232.188	1						203.462	61.9231	58
	113.75	231.875	2						203.269	61.9231	59
	113.75	231.875	3						203.269	61.9231	60
	113.75	231.875	4						203.269	61.9231	61
	113.75	231.875	5						204.231	62.3077	62
	113.75	231.875	6						204.038	62.3077	63
	114.688	232.5	7						204.038	62.3077	64
	114.688	232.5	8						205	62.3077	65
	114.688	232.5	9						205.192	62.6923	66
	114.688	232.5	10						#%stop speckle%
	114.688	232.5	11						#%start speckle%
	114.688	232.5	12						189.444	222.5	1
	115.625	230.938	13						188.889	222.5	2
	115.312	231.562	14						189.167	222.222	3
	115.312	231.562	15						189.167	222.222	4
	115.312	231.25	16						189.167	222.222	5
	115.312	231.25	17						189.167	222.222	6
	115.312	230.938	18						189.167	222.222	7
	115.312	230.938	19						189.167	222.222	8
	115.312	230.938	20						189.167	222.5	9
	115.312	230.938	21						189.167	222.5	10
	116.875	230.625	22						189.167	222.5	11
	117.188	230.625	23						189.167	222.5	12
	117.188	230.625	24						189.167	222.5	13
	117.188	230.625	25						189.167	222.5	14
	117.188	230.625	26						189.167	222.5	15
	117.188	230.625	27						189.167	222.5	16
	116.875	230	28						189.167	222.5	17
	117.5	229.375	29						189.167	222.5	18
	118.125	230	30						189.167	222.5	19
	117.5	229.062	31						189.167	222.5	20
	118.438	230.625	32						190.556	221.944	21
	118.125	230.312	33						190.556	221.944	22
	118.125	229.688	34						190.556	221.944	23
	118.125	229.688	35						190.556	221.944	24
	118.438	230.312	36						190.556	221.667	25
	118.438	230.312	37						190.556	221.667	26
	118.125	229.688	38						190.556	221.667	27
	119.062	229.375	39						190.556	221.667	28
	119.062	229.375	40						190.556	221.667	29
	119.062	229.688	41						190.556	221.667	30
	119.062	230	42						190.278	221.667	31
	119.062	230.312	43						190.556	222.222	32
	119.062	230.312	44						190.556	223.056	33
	119.062	229.688	45						190.556	222.222	34
	119.062	229.688	46						190.556	222.222	35
	119.062	229.688	47						190.556	221.944	36
	119.062	229.688	48						190.556	221.944	37
	119.062	229.688	49						#%stop speckle%
	119.062	229.688	50						#%start speckle%
	119.062	229.688	51						184.286	241.905	1
	119.375	229.688	52						#%stop speckle%
	119.375	229.688	53						#%start speckle%
	119.375	229.688	54						154.706	212.647	1
	120	229.062	55						154.412	212.059	2
	120.312	228.438	56						154.118	212.647	3
	120.312	229.688	57						153.235	213.235	4
	121.562	229.375	58						153.529	212.941	5
	121.562	229.375	59						153.235	212.941	6
	122.188	228.438	60						154.706	212.059	7
	122.188	228.438	61						#%stop speckle%
	122.812	228.75	62						#%start speckle%
	122.812	228.75	63						227.381	109.762	1
	122.5	229.375	64						228.095	110.476	2
	122.5	229.375	65						228.571	110.238	3
	121.875	228.75	66						228.095	109.524	4
	#%stop speckle%								227.857	109.762	5
	#%start speckle%								227.857	109.762	6
	133.125	50.3125	1						227.857	109.762	7
	133.125	48.75	2						228.333	110	8
	133.125	48.4375	3						228.571	110	9
	134.062	49.375	4						228.81	110.238	10
	134.375	49.0625	5						228.81	110	11
	134.062	48.4375	6						229.762	110	12
	133.75	49.0625	7						229.762	110	13
	133.75	49.6875	8						229.762	110	14
	134.375	50.3125	9						230.238	110	15
	134.062	51.25	10						230.238	110	16
	135	51.5625	11						230.238	110	17
	#%stop speckle%								230.476	110.476	18
	#%start speckle%								230	111.19	19
	108.333	148.333	1						230.476	111.19	20
	106.667	148	2						230.476	110.476	21
	#%stop speckle%								230.714	110.476	22
	#%start speckle%								231.19	110	23
	106.667	127	1						231.429	110.714	24
	#%stop speckle%								231.429	110.714	25
	#%start speckle%								230.952	110.952	26
	128.438	122.188	1						230.952	110.476	27
	128.438	121.875	2						230.952	110.476	28
	129.062	124.062	3						231.429	110.238	29
	129.062	123.75	4						232.857	110.714	30
	128.438	122.812	5						232.857	110.714	31
	128.75	122.5	6						232.619	110.238	32
	128.75	122.5	7						232.619	110.238	33
	128.75	122.188	8						233.571	110.952	34
	129.062	123.125	9						234.048	111.429	35
	129.688	123.438	10						234.048	111.429	36
	129.062	123.125	11						233.571	111.667	37
	#%stop speckle%								233.571	111.667	38
	#%start speckle%								233.571	111.905	39
	167	15.6667	1						234.762	111.905	40
	166	16	2						236.429	111.429	41
	166.333	16	3						236.667	111.905	42
	167.333	16	4						235.952	112.143	43
	167.667	16.3333	5						236.19	112.143	44
	167.333	14.6667	6						236.19	112.143	45
	167.333	16.3333	7						236.19	112.143	46
	167.333	16	8						236.429	112.143	47
	167.667	16.3333	9						236.429	112.143	48
	167.667	16.3333	10						236.429	112.143	49
	168.667	16.3333	11						236.905	112.143	50
	168.333	17	12						237.857	112.619	51
	168.667	18.3333	13						237.857	112.619	52
	170.333	19.6667	14						235.476	111.667	53
	170	20.3333	15						237.143	112.619	54
	170	20.6667	16						236.905	112.143	55
	170	20.6667	17						237.143	111.905	56
	169.333	21	18						236.429	112.143	57
	#%stop speckle%								235.714	110.952	58
	#%start speckle%								235.952	111.19	59
	107	207.333	1						236.429	111.905	60
	#%stop speckle%								236.905	111.429	61
	#%start speckle%								236.905	111.429	62
	137.812	67.5	1						236.19	110.952	63
	137.812	67.8125	2						235.952	110.714	64
	137.812	67.8125	3						236.19	111.429	65
	137.812	67.8125	4						237.381	111.905	66
	137.812	67.8125	5						#%stop speckle%
	137.812	67.1875	6						#%start speckle%
	137.188	67.8125	7						231.667	209.762	1
	138.125	68.125	8						232.619	209.524	2
	137.812	67.8125	9						232.619	209.286	3
	138.125	68.125	10						232.619	209.286	4
	138.75	68.125	11						232.619	209.524	5
	#%stop speckle%								232.857	209.762	6
	#%start speckle%								232.857	209.762	7
	150	62.3333	1						232.857	209.762	8
	148.667	62.6667	2						232.857	209.762	9
	149	62.3333	3						233.571	209.762	10
	150	62.3333	4						233.571	209.762	11
	150	62.6667	5						233.571	209.762	12
	150	62.6667	6						233.571	209.762	13
	150	62.6667	7						233.571	209.762	14
	150	62.6667	8						233.571	209.762	15
	150	62.6667	9						233.571	209.762	16
	150	62.6667	10						233.81	209.762	17
	150	62.6667	11						233.81	209.762	18
	151	62	12						233.81	209.762	19
	150.333	62	13						233.81	209.762	20
	150.333	62	14						233.81	209.762	21
	150.333	62	15						233.81	209.762	22
	150.333	62	16						233.81	209.762	23
	150.667	63	17						233.81	209.762	24
	150.667	63	18						233.81	209.286	25
	151	62.6667	19						234.286	208.81	26
	151	62.6667	20						234.286	208.81	27
	151	62.6667	21						234.286	208.81	28
	151	62.6667	22						234.286	208.81	29
	151	62.6667	23						234.524	208.81	30
	151	62.6667	24						235.952	209.762	31
	152	63	25						235.952	209.762	32
	151.667	62.6667	26						235.952	209.762	33
	151.333	62.3333	27						235.952	209.524	34
	151.333	62.3333	28						235.952	209.524	35
	151.333	62.3333	29						235.952	209.524	36
	151.333	62.3333	30						235.952	209.524	37
	151.333	62.3333	31						235.952	209.524	38
	151.333	62.3333	32						236.19	209.286	39
	151.333	62.6667	33						236.19	209.286	40
	151.333	63.3333	34						235.952	208.81	41
	151.667	63	35						235.952	208.81	42
	152.333	64	36						235.952	208.81	43
	152.333	64.6667	37						235.952	208.571	44
	152.333	64.6667	38						236.429	208.81	45
	152.333	64.6667	39						236.429	208.81	46
	152.333	64.6667	40						236.429	208.81	47
	152.333	64.6667	41						236.667	208.571	48
	152.333	64.6667	42						236.667	208.571	49
	152.333	64.6667	43						236.667	208.571	50
	152.667	64.6667	44						236.905	208.333	51
	152.667	64.6667	45						237.619	208.333	52
	152.667	64.6667	46						237.857	208.333	53
	152.667	64.6667	47						237.857	208.333	54
	152.667	64.6667	48						237.857	208.333	55
	152.667	64.6667	49						237.857	208.333	56
	152.667	64.6667	50						237.857	208.333	57
	152.667	64.6667	51						237.857	208.333	58
	152.667	64.6667	52						237.857	208.571	59
	152.667	64.6667	53						237.857	208.571	60
	152.667	64.6667	54						237.857	208.571	61
	152.667	64.6667	55						237.857	208.571	62
	153	64.3333	56						237.857	208.333	63
	152.667	64.6667	57						237.857	208.571	64
	154	66	58						237.857	209.048	65
	154	66	59						238.095	209.762	66
	154	66	60						#%stop speckle%
	154	66	61						#%start speckle%
	154	66	62						154.444	201.111	1
	154	66	63						155.556	201.111	2
	155	66	64						155.556	200.556	3
	155	66	65						155.556	200.556	4
	155	66	66						155.556	200.556	5
	#%stop speckle%								155.556	200.556	6
	#%start speckle%								155.556	200.556	7
	74.6667	120	1						155.556	200.556	8
	75.6667	119.667	2						155.556	200.556	9
	#%stop speckle%								155.556	200.556	10
	#%start speckle%								155.556	200.556	11
	78.75	250.938	1						156.111	201.111	12
	79.0625	249.688	2						156.111	201.111	13
	79.0625	247.812	3						156.111	201.389	14
	79.375	247.5	4						156.944	201.111	15
	80.9375	247.5	5						156.944	201.111	16
	#%stop speckle%								156.944	201.111	17
	#%start speckle%								156.944	201.111	18
	121.667	71.3333	1						157.5	200.556	19
	#%stop speckle%								156.944	200.556	20
	#%start speckle%								156.944	200.556	21
	156.333	26.6667	1						156.944	200.556	22
	#%stop speckle%								156.944	200.556	23
									157.778	200.278	24
									158.333	200.833	25
									158.333	200.833	26
									158.333	200.833	27
									158.333	200.833	28
									158.333	200.833	29
									158.333	200.556	30
									159.167	200.833	31
									158.611	200.556	32
									158.889	200.833	33
									158.889	200.833	34
									158.889	200.833	35
									158.889	200.833	36
									158.889	200.833	37
									159.167	200.833	38
									159.167	200.833	39
									159.722	199.444	40
									160	199.167	41
									160	199.167	42
									160	199.167	43
									159.444	199.167	44
									159.722	199.167	45
									161.111	199.167	46
									160.833	199.167	47
									160.833	199.444	48
									160.833	199.722	49
									160.278	200	50
									161.111	199.444	51
									161.111	199.444	52
									161.389	199.722	53
									161.389	199.722	54
									161.111	199.722	55
									161.111	199.722	56
									161.111	199.722	57
									161.111	199.722	58
									161.111	199.722	59
									161.111	199.722	60
									161.111	199.722	61
									161.944	200	62
									161.944	200	63
									161.944	200	64
									161.944	200	65
									161.944	200	66
									#%stop speckle%
									#%start speckle%
									175.556	104.167	1
									175.556	103.056	2
									176.667	104.444	3
									176.389	104.167	4
									176.389	104.167	5
									176.389	104.167	6
									176.111	103.889	7
									176.111	103.611	8
									176.389	103.333	9
									176.389	103.611	10
									#%stop speckle%
									#%start speckle%
									199.444	235.833	1
									199.444	235.833	2
									199.444	235.833	3
									199.722	235.833	4
									200	235.833	5
									200	235.833	6
									200	235.833	7
									201.111	235.556	8
									201.111	235.556	9
									201.111	234.722	10
									200.556	235.278	11
									199.722	235.278	12
									200.556	235.278	13
									201.111	235	14
									201.389	235.278	15
									201.944	234.444	16
									201.944	234.444	17
									201.389	234.167	18
									201.111	234.167	19
									201.667	233.611	20
									201.667	234.167	21
									203.056	234.722	22
									202.778	234.444	23
									202.778	234.444	24
									202.778	234.444	25
									202.778	233.056	26
									202.778	234.167	27
									202.5	235	28
									#%stop speckle%
									#%start speckle%
									222.143	45.9524	1
									222.619	47.381	2
									223.571	47.1429	3
									224.524	46.1905	4
									#%stop speckle%
									#%start speckle%
									184.722	151.667	1
									184.167	151.389	2
									185.556	150.278	3
									185.556	150.278	4
									185.556	150.278	5
									185.556	150.278	6
									185.278	149.722	7
									185.278	149.722	8
									185.278	149.722	9
									185.278	149.722	10
									185.556	149.722	11
									185.556	149.722	12
									185.556	149.722	13
									185.556	149.722	14
									185.556	149.722	15
									185.556	149.722	16
									185.556	149.722	17
									186.667	149.722	18
									185.833	150.278	19
									186.111	150.278	20
									186.111	150	21
									186.111	150	22
									186.111	150	23
									187.5	150	24
									188.333	149.444	25
									188.333	149.444	26
									188.611	149.722	27
									189.167	149.722	28
									189.722	149.167	29
									191.111	148.889	30
									191.111	148.889	31
									191.667	147.5	32
									191.111	146.944	33
									190.556	147.222	34
									190.278	147.778	35
									190	148.056	36
									189.722	147.778	37
									190.278	147.5	38
									190.556	147.778	39
									190	150	40
									190	147.5	41
									190.833	148.611	42
									190.556	147.5	43
									191.389	146.667	44
									191.389	147.222	45
									#%stop speckle%
									#%start speckle%
									235.238	120.238	1
									236.19	121.429	2
									237.381	121.429	3
									237.381	121.429	4
									237.381	121.429	5
									237.381	121.429	6
									237.381	121.429	7
									237.619	121.667	8
									237.857	121.667	9
									237.857	121.667	10
									238.095	120.952	11
									238.095	120.952	12
									238.095	121.19	13
									237.619	120.238	14
									#%stop speckle%
									#%start speckle%
									159.444	232.222	1
									159.167	231.667	2
									160.278	231.389	3
									159.444	230.278	4
									159.444	230	5
									159.722	230	6
									160	230.278	7
									159.444	230	8
									160.278	230	9
									159.444	229.722	10
									158.889	229.444	11
									159.444	230.278	12
									160	229.444	13
									160.556	229.722	14
									160.833	229.167	15
									160.833	229.722	16
									161.111	229.444	17
									161.389	230	18
									161.944	230	19
									161.389	229.167	20
									#%stop speckle%
									#%start speckle%
									183.056	126.667	1
									183.889	126.389	2
									183.611	127.5	3
									183.611	127.5	4
									183.611	127.5	5
									183.611	127.5	6
									183.611	127.5	7
									183.611	127.5	8
									183.611	127.5	9
									183.611	127.5	10
									183.611	127.5	11
									183.611	127.5	12
									183.611	127.5	13
									183.611	127.5	14
									186.111	126.111	15
									185.278	125.833	16
									186.389	126.389	17
									187.778	126.389	18
									186.389	125.833	19
									186.111	125.278	20
									185.556	124.167	21
									186.667	123.889	22
									186.667	124.722	23
									186.944	125.833	24
									185.833	125.278	25
									186.944	124.722	26
									186.667	125	27
									187.778	126.389	28
									186.944	124.722	29
									188.333	125.278	30
									187.5	124.444	31
									187.778	124.444	32
									188.611	126.111	33
									186.944	125.556	34
									187.222	125.833	35
									187.222	124.722	36
									188.056	125.556	37
									186.944	126.944	38
									187.778	125.556	39
									188.889	125.556	40
									188.889	124.444	41
									188.056	125.278	42
									187.222	125.278	43
									188.611	124.722	44
									188.889	124.722	45
									189.722	125.556	46
									187.222	124.444	47
									188.611	125.833	48
									188.889	125.278	49
									187.778	124.444	50
									187.222	126.667	51
									188.611	125.278	52
									190	125.833	53
									190	125.556	54
									190.278	124.167	55
									190.556	123.611	56
									190	123.333	57
									191.667	123.611	58
									190.833	123.889	59
									190.556	122.222	60
									191.389	122.778	61
									191.944	123.056	62
									191.944	124.167	63
									192.5	123.333	64
									192.222	121.667	65
									192.222	122.778	66
									#%stop speckle%
									#%start speckle%
									261.944	131.667	1
									262.778	130.556	2
									262.778	130.556	3
									263.056	130.556	4
									263.333	130.556	5
									263.333	130.556	6
									263.333	130.556	7
									264.167	130.556	8
									264.167	132.778	9
									264.167	133.056	10
									264.167	132.5	11
									264.167	131.667	12
									264.167	130.556	13
									264.167	130.556	14
									264.167	130.556	15
									264.167	130.556	16
									264.167	130.556	17
									264.167	130.556	18
									264.167	130.556	19
									264.167	130.556	20
									264.167	130.556	21
									264.167	130.556	22
									264.167	130.556	23
									263.889	130.833	24
									263.889	130.833	25
									264.167	130.278	26
									264.167	130.278	27
									264.167	130	28
									264.167	130	29
									264.167	130	30
									264.167	130	31
									264.167	130	32
									264.167	130	33
									264.167	130	34
									264.167	130	35
									264.167	130	36
									#%stop speckle%
									#%start speckle%
									204.048	98.0952	1
									202.619	97.619	2
									203.81	96.9048	3
									203.095	97.8571	4
									203.095	97.8571	5
									203.333	97.8571	6
									203.333	97.8571	7
									203.333	97.8571	8
									203.333	97.8571	9
									203.333	97.8571	10
									203.571	97.8571	11
									203.571	97.8571	12
									203.571	97.8571	13
									203.81	98.0952	14
									203.81	98.0952	15
									204.048	97.8571	16
									204.048	97.8571	17
									204.048	97.8571	18
									204.286	97.8571	19
									204.286	97.8571	20
									204.762	98.3333	21
									204.762	98.3333	22
									204.762	98.3333	23
									204.762	98.3333	24
									204.762	98.3333	25
									204.762	98.3333	26
									204.762	98.3333	27
									204.762	98.3333	28
									204.762	98.3333	29
									204.762	98.3333	30
									204.762	98.3333	31
									205.238	98.3333	32
									205.238	98.3333	33
									205.476	99.2857	34
									205.476	98.5714	35
									205.476	98.5714	36
									205.476	98.3333	37
									205.476	98.3333	38
									205.714	98.3333	39
									205.714	98.3333	40
									205.714	98.3333	41
									205.714	98.3333	42
									205.714	98.3333	43
									205.714	98.3333	44
									205.714	98.3333	45
									206.429	98.3333	46
									206.429	98.3333	47
									206.905	98.8095	48
									206.905	98.8095	49
									206.905	98.8095	50
									206.905	98.8095	51
									206.905	98.8095	52
									207.857	98.8095	53
									207.857	98.8095	54
									208.095	98.3333	55
									208.095	97.381	56
									208.095	97.619	57
									208.095	97.619	58
									208.333	97.619	59
									208.333	97.619	60
									208.333	97.619	61
									208.571	98.0952	62
									208.571	98.0952	63
									208.571	98.0952	64
									208.571	98.0952	65
									208.571	98.0952	66
									#%stop speckle%
									#%start speckle%
									196.429	187.619	1
									197.143	188.095	2
									197.381	187.619	3
									197.381	187.619	4
									#%stop speckle%
									#%start speckle%
									159.6	159.2	1
									160.8	158.4	2
									160	159.6	3
									160	159.6	4
									160	159.6	5
									160	159.6	6
									160	159.6	7
									160	159.6	8
									160	159.6	9
									160	159.6	10
									160	159.6	11
									160	159.6	12
									160	159.6	13
									160.2	159.2	14
									160.2	159.2	15
									160.2	159.2	16
									160.2	159.2	17
									160.2	159.2	18
									160.2	159	19
									160.4	158.8	20
									160.4	158.8	21
									160.4	158.8	22
									160.4	158.8	23
									160.4	158.8	24
									160.4	158.8	25
									160.4	158.8	26
									160.4	158.8	27
									160.4	158.8	28
									160.4	158.8	29
									160.4	158.8	30
									160.4	158.8	31
									160.6	158.8	32
									161.4	158.4	33
									161.4	158.4	34
									161.4	158.4	35
									161.4	158.4	36
									161.4	158.4	37
									162	158.8	38
									162	158.8	39
									162	158.8	40
									162	158.8	41
									162	158.8	42
									162	158.8	43
									162	158.8	44
									162	158.8	45
									162	158.8	46
									162.6	158.6	47
									162.6	158.6	48
									163.4	159	49
									163.4	159	50
									163.4	159	51
									164.4	158.4	52
									#%stop speckle%
									#%start speckle%
									215.556	84.1667	1
									215.278	84.4444	2
									215.278	84.4444	3
									215.278	84.4444	4
									215.278	84.4444	5
									216.667	84.7222	6
									216.667	84.7222	7
									216.389	84.7222	8
									215.833	84.7222	9
									215.833	84.7222	10
									217.222	84.4444	11
									216.944	83.6111	12
									#%stop speckle%
									#%start speckle%
									223.571	177.857	1
									222.857	178.571	2
									223.571	178.571	3
									#%stop speckle%
									#%start speckle%
									203.81	205.476	1
									203.571	205	2
									204.048	205.476	3
									204.048	205.476	4
									204.048	205.476	5
									204.048	205.476	6
									204.048	205.476	7
									204.524	205.476	8
									204.524	205.476	9
									204.524	205.476	10
									204.524	205.476	11
									204.524	205.714	12
									205.238	205.476	13
									205.238	205.476	14
									205.476	205.714	15
									205	206.429	16
									205	206.19	17
									204.762	205.714	18
									203.81	207.143	19
									202.857	207.619	20
									200	207.619	21
									202.143	207.857	22
									202.857	207.381	23
									203.095	207.381	24
									203.095	207.619	25
									202.143	207.381	26
									201.905	208.095	27
									#%stop speckle%
									#%start speckle%
									221.667	151.389	1
									221.111	151.667	2
									222.222	151.389	3
									221.667	152.222	4
									222.778	151.389	5
									223.889	151.389	6
									223.056	151.111	7
									222.778	150.556	8
									222.778	150.556	9
									222.778	151.111	10
									223.333	151.111	11
									223.333	151.111	12
									223.333	151.111	13
									223.333	151.111	14
									223.611	151.389	15
									223.611	152.222	16
									223.889	152.5	17
									224.167	152.778	18
									225	152.778	19
									226.111	153.056	20
									226.389	152.778	21
									226.944	152.5	22
									226.944	153.056	23
									226.944	153.056	24
									226.667	152.5	25
									226.667	152.5	26
									226.667	152.5	27
									226.667	152.5	28
									226.667	152.5	29
									226.667	152.5	30
									226.667	152.5	31
									226.667	152.5	32
									226.667	152.5	33
									226.667	152.5	34
									226.667	152.5	35
									226.667	152.5	36
									226.667	152.5	37
									226.667	152.5	38
									226.667	152.5	39
									226.667	152.5	40
									226.944	153.333	41
									226.944	153.333	42
									227.5	153.333	43
									227.5	153.333	44
									227.5	153.333	45
									227.5	153.333	46
									228.056	153.333	47
									227.222	152.778	48
									227.222	152.778	49
									227.222	152.778	50
									227.5	152.5	51
									227.222	152.778	52
									227.222	152.778	53
									227.222	152.778	54
									227.222	152.778	55
									228.056	152.778	56
									228.056	152.778	57
									228.056	152.778	58
									227.5	153.333	59
									227.778	152.5	60
									227.778	152.5	61
									227.778	152.5	62
									227.778	152.5	63
									227.778	152.5	64
									227.778	152.5	65
									227.778	152.5	66
									#%stop speckle%
									#%start speckle%
									235.476	218.571	1
									#%stop speckle%
									#%start speckle%
									203.056	118.056	1
									202.778	117.778	2
									203.333	118.333	3
									203.056	118.056	4
									203.056	117.778	5
									203.056	116.944	6
									203.056	117.5	7
									203.889	117.778	8
									204.167	118.611	9
									204.444	117.5	10
									204.444	117.5	11
									204.444	117.5	12
									203.889	118.611	13
									203.889	118.333	14
									204.167	118.333	15
									204.444	118.056	16
									204.167	117.778	17
									204.722	116.667	18
									204.722	116.111	19
									205.278	116.944	20
									205.833	116.944	21
									206.389	116.944	22
									206.389	117.222	23
									206.389	117.222	24
									206.111	118.889	25
									206.111	117.778	26
									206.111	117.5	27
									206.111	117.5	28
									206.111	117.5	29
									206.111	117.5	30
									206.111	117.5	31
									206.111	117.5	32
									206.111	117.5	33
									206.111	117.5	34
									206.111	117.5	35
									206.389	118.056	36
									206.667	118.333	37
									206.667	118.333	38
									206.667	118.333	39
									206.667	118.333	40
									206.667	118.333	41
									206.667	118.333	42
									208.056	118.333	43
									208.611	118.611	44
									208.611	118.611	45
									208.611	118.611	46
									208.611	118.333	47
									208.611	118.333	48
									208.611	118.333	49
									208.611	118.333	50
									208.889	118.056	51
									209.722	118.056	52
									210.556	118.056	53
									210.556	118.056	54
									210.556	118.056	55
									210.556	118.056	56
									210.556	117.5	57
									210.556	117.5	58
									211.111	117.778	59
									211.111	117.778	60
									211.111	117.778	61
									211.111	117.778	62
									210.556	116.389	63
									211.667	117.5	64
									211.389	116.944	65
									211.944	117.222	66
									#%stop speckle%
									#%start speckle%
									183.333	140.556	1
									182.5	139.722	2
									182.5	139.722	3
									183.056	139.722	4
									184.444	139.444	5
									184.167	139.722	6
									184.167	139.722	7
									184.167	139.722	8
									184.167	139.722	9
									184.167	139.722	10
									184.167	139.722	11
									184.167	139.722	12
									184.444	139.722	13
									184.444	139.722	14
									184.444	139.722	15
									184.722	140	16
									185.278	139.444	17
									185.278	139.444	18
									185.833	139.444	19
									185.833	139.444	20
									185.556	139.444	21
									185.556	139.444	22
									185.556	139.444	23
									185.556	139.444	24
									185.556	139.444	25
									185.556	139.444	26
									185.556	139.444	27
									185.556	139.444	28
									185.833	139.444	29
									185.833	139.444	30
									185.833	139.444	31
									185.833	139.444	32
									185.833	139.444	33
									185.833	139.444	34
									185.833	139.444	35
									185.833	139.444	36
									185.833	139.167	37
									185.833	139.167	38
									185.833	139.167	39
									185.833	139.167	40
									185.556	139.167	41
									185.556	139.167	42
									185.556	139.167	43
									185.556	139.167	44
									185.556	139.167	45
									185.833	139.444	46
									185.833	139.444	47
									185.833	139.444	48
									185.833	139.444	49
									186.667	139.444	50
									187.222	139.444	51
									187.222	139.444	52
									#%stop speckle%
									#%start speckle%
									176.667	212.143	1
									179.048	211.905	2
									179.286	213.095	3
									179.286	212.857	4
									179.286	212.857	5
									179.286	212.857	6
									179.762	212.857	7
									179.762	212.857	8
									180.238	212.381	9
									180.238	212.381	10
									180.714	211.905	11
									180.476	211.905	12
									180.476	211.905	13
									180.714	211.667	14
									180.714	211.667	15
									180.714	211.667	16
									#%stop speckle%
									#%start speckle%
									249.167	71.3889	1
									248.889	71.3889	2
									248.889	71.3889	3
									248.889	71.3889	4
									248.889	71.3889	5
									248.889	71.3889	6
									248.889	71.3889	7
									248.889	71.3889	8
									248.889	71.3889	9
									248.889	71.3889	10
									248.889	71.3889	11
									248.889	71.3889	12
									248.889	71.3889	13
									248.889	71.3889	14
									249.167	71.3889	15
									249.444	71.3889	16
									250	71.6667	17
									250	71.6667	18
									250	71.6667	19
									250.833	72.7778	20
									250.833	73.0556	21
									250.833	73.0556	22
									250.833	72.7778	23
									250.833	72.7778	24
									250.833	72.7778	25
									250.833	72.7778	26
									250.833	72.7778	27
									250.833	72.7778	28
									250.833	72.7778	29
									250.833	72.7778	30
									250.833	72.7778	31
									250.833	72.7778	32
									250.833	72.7778	33
									250.833	72.7778	34
									250.833	72.7778	35
									250.833	72.7778	36
									250.833	72.7778	37
									250.833	72.7778	38
									250.833	72.7778	39
									250.833	72.7778	40
									251.389	73.6111	41
									251.111	73.6111	42
									250.833	73.0556	43
									250.833	73.0556	44
									250.833	73.0556	45
									250.833	73.0556	46
									251.389	73.8889	47
									251.389	74.1667	48
									251.389	74.1667	49
									251.389	74.1667	50
									251.389	74.1667	51
									251.667	75.5556	52
									251.667	75.2778	53
									251.667	75.2778	54
									251.667	75.2778	55
									251.667	75.2778	56
									#%stop speckle%
									#%start speckle%
									233.095	73.5714	1
									232.143	74.0476	2
									232.143	74.0476	3
									233.095	75.7143	4
									232.857	75.2381	5
									232.857	75.7143	6
									233.571	75.9524	7
									233.571	75.9524	8
									234.524	76.1905	9
									234.524	76.1905	10
									234.524	76.1905	11
									234.524	76.1905	12
									234.524	76.1905	13
									234.524	76.1905	14
									234.524	76.1905	15
									234.524	76.1905	16
									234.524	76.1905	17
									234.524	76.1905	18
									234.524	76.1905	19
									234.524	76.1905	20
									234.524	76.1905	21
									235	75.9524	22
									235	75.7143	23
									235	75.7143	24
									235	75.2381	25
									235	75.2381	26
									235	75.2381	27
									235	75.2381	28
									235	75.2381	29
									235	75.2381	30
									235	75.2381	31
									235	75.2381	32
									235	75.2381	33
									235	75.2381	34
									235	75.2381	35
									235	75.2381	36
									235	75.2381	37
									235.476	75.2381	38
									235.476	75.2381	39
									235.476	75.2381	40
									235.476	75.2381	41
									235.476	75.2381	42
									235.476	75.2381	43
									235.476	75.2381	44
									235.476	75.2381	45
									235.476	75.2381	46
									235.476	75.2381	47
									235.476	75.2381	48
									235.476	75.2381	49
									236.905	76.1905	50
									236.905	76.1905	51
									236.905	76.1905	52
									236.905	76.1905	53
									#%stop speckle%
									#%start speckle%
									235.952	203.81	1
									235	204.524	2
									235.476	203.81	3
									236.429	204.286	4
									236.429	204.286	5
									236.429	204.286	6
									236.429	204.286	7
									236.429	204.286	8
									236.429	203.571	9
									236.905	203.81	10
									237.619	204.524	11
									236.19	204.048	12
									236.905	204.048	13
									236.905	204.048	14
									236.667	203.81	15
									236.667	204.286	16
									236.667	203.571	17
									236.667	203.571	18
									236.667	203.571	19
									236.667	203.095	20
									236.667	203.095	21
									236.667	202.857	22
									236.667	203.095	23
									236.667	202.857	24
									237.143	202.619	25
									236.905	203.571	26
									238.095	203.333	27
									238.095	203.095	28
									238.333	203.333	29
									238.095	203.095	30
									238.571	203.81	31
									237.857	203.571	32
									238.333	203.81	33
									238.571	203.095	34
									238.571	203.095	35
									238.81	204.048	36
									#%stop speckle%
									#%start speckle%
									248.333	29.7619	1
									248.81	30.2381	2
									249.048	31.1905	3
									248.81	30.2381	4
									249.048	30	5
									249.286	29.5238	6
									250	30.4762	7
									250	30.4762	8
									249.762	30.2381	9
									249.524	30.9524	10
									249.762	30	11
									250	31.6667	12
									250.238	31.4286	13
									250.238	31.4286	14
									250.952	31.6667	15
									250.952	31.9048	16
									251.905	33.5714	17
									252.143	33.5714	18
									250.714	31.4286	19
									251.429	31.6667	20
									251.429	33.5714	21
									251.667	32.8571	22
									251.905	32.619	23
									251.905	32.1429	24
									251.19	30.9524	25
									251.429	30.9524	26
									251.667	32.8571	27
									251.905	32.619	28
									252.143	31.6667	29
									252.619	31.6667	30
									252.619	31.6667	31
									252.381	31.6667	32
									252.619	30.9524	33
									252.857	31.1905	34
									252.619	30.9524	35
									253.095	31.1905	36
									255	32.619	37
									254.286	32.1429	38
									254.762	33.0952	39
									255.476	33.3333	40
									255.952	33.8095	41
									255.476	33.0952	42
									255	33.0952	43
									256.429	33.3333	44
									256.429	33.8095	45
									255.714	34.2857	46
									255.238	33.8095	47
									256.429	33.5714	48
									255.476	33.5714	49
									255	33.5714	50
									253.571	31.9048	51
									253.571	31.1905	52
									252.143	31.1905	53
									252.857	31.9048	54
									252.143	30.2381	55
									251.905	29.2857	56
									253.095	29.5238	57
									251.667	28.5714	58
									252.381	25.2381	59
									252.857	24.5238	60
									252.619	23.5714	61
									#%stop speckle%
									#%start speckle%
									196.905	249.524	1
									197.143	249.048	2
									197.857	249.048	3
									198.095	249.048	4
									198.333	248.81	5
									198.333	248.81	6
									198.333	248.81	7
									198.333	248.81	8
									198.333	248.81	9
									198.333	248.81	10
									198.333	248.81	11
									198.333	248.81	12
									198.333	248.81	13
									198.333	248.81	14
									198.333	248.81	15
									197.857	250	16
									197.857	250	17
									198.333	249.048	18
									197.857	247.857	19
									198.333	247.857	20
									198.333	247.619	21
									198.333	247.619	22
									198.333	247.619	23
									198.333	247.619	24
									198.333	247.619	25
									198.333	247.619	26
									199.286	247.857	27
									199.286	247.857	28
									199.762	247.857	29
									199.762	247.857	30
									199.286	246.429	31
									200.238	246.905	32
									200.238	246.905	33
									199.524	246.429	34
									200.238	246.905	35
									200.238	247.381	36
									200	245.952	37
									200	245.238	38
									199.524	245.238	39
									199.286	245.476	40
									199.286	245.476	41
									199.524	245.714	42
									199.524	245.714	43
									199.524	245.714	44
									199.524	245.714	45
									199.524	245.714	46
									199.524	245.714	47
									199.524	245.238	48
									200.238	245	49
									200.238	245	50
									200.238	245	51
									200.476	245	52
									200.476	245.238	53
									200.238	245.238	54
									199.762	244.762	55
									199.762	244.762	56
									199.762	244.762	57
									199.762	244.762	58
									199.762	244.762	59
									199.762	244.762	60
									199.762	244.762	61
									199.762	244.762	62
									199.762	244.762	63
									199.762	244.048	64
									200	244.286	65
									200.476	244.762	66
									#%stop speckle%
									#%start speckle%
									184.167	158.056	1
									185.278	159.722	2
									183.333	159.444	3
									184.722	159.444	4
									184.722	159.167	5
									184.167	160	6
									#%stop speckle%
									#%start speckle%
									207.5	176.389	1
									206.944	176.667	2
									206.111	176.389	3
									206.667	175	4
									206.667	174.444	5
									206.667	174.444	6
									206.667	174.444	7
									206.667	174.444	8
									206.667	174.444	9
									206.667	174.444	10
									206.944	174.167	11
									206.944	174.167	12
									208.056	174.444	13
									208.056	174.444	14
									208.056	174.444	15
									209.444	174.167	16
									209.444	174.167	17
									209.444	174.167	18
									209.444	174.167	19
									210.278	174.167	20
									210.278	174.444	21
									210.278	174.167	22
									210.278	174.167	23
									210.278	174.167	24
									210.278	174.167	25
									210.278	174.167	26
									210.278	174.167	27
									210.278	173.889	28
									209.722	173.889	29
									209.444	175	30
									209.444	175	31
									209.167	175.833	32
									209.167	175.833	33
									209.167	175.833	34
									209.167	175.833	35
									209.722	176.389	36
									209.722	176.389	37
									208.611	176.389	38
									209.444	176.944	39
									208.889	177.778	40
									208.889	177.778	41
									208.889	176.667	42
									208.889	176.667	43
									208.889	176.667	44
									208.889	176.667	45
									208.889	176.667	46
									208.889	176.667	47
									208.889	176.667	48
									208.889	176.667	49
									208.889	176.667	50
									208.889	176.389	51
									208.889	176.389	52
									208.889	176.389	53
									208.889	176.389	54
									208.889	176.389	55
									208.889	176.389	56
									208.889	176.389	57
									208.889	176.389	58
									208.889	176.389	59
									208.889	176.389	60
									208.889	176.389	61
									208.889	176.389	62
									208.889	176.389	63
									208.889	176.389	64
									208.889	176.389	65
									208.889	176.389	66
									#%stop speckle%
									#%start speckle%
									222.857	95.2381	1
									222.857	94.5238	2
									222.857	94.5238	3
									223.571	95	4
									223.095	94.2857	5
									#%stop speckle%
									#%start speckle%
									174.722	118.611	1
									173.889	119.167	2
									173.889	118.056	3
									173.889	118.056	4
									173.889	118.056	5
									173.889	118.056	6
									175	118.333	7
									176.111	118.889	8
									176.111	118.889	9
									175.556	118.611	10
									175.556	118.611	11
									175.556	118.611	12
									175.556	118.611	13
									175.556	118.611	14
									175.556	118.611	15
									175.556	118.611	16
									175.556	118.611	17
									175.556	118.611	18
									175.556	118.611	19
									175.556	118.611	20
									175.556	118.611	21
									175.556	118.611	22
									175.556	118.611	23
									175.556	118.611	24
									175.556	118.611	25
									175.556	118.611	26
									176.111	118.333	27
									176.111	118.333	28
									176.111	118.333	29
									176.111	118.333	30
									176.111	118.333	31
									176.111	118.333	32
									176.111	118.333	33
									176.389	118.056	34
									176.944	118.056	35
									176.944	118.056	36
									176.944	118.056	37
									176.944	118.056	38
									176.944	118.056	39
									176.944	118.056	40
									176.944	118.056	41
									176.944	118.056	42
									176.944	118.056	43
									176.944	118.056	44
									176.944	118.056	45
									176.944	118.056	46
									176.944	118.056	47
									176.944	118.056	48
									176.944	118.056	49
									178.333	119.444	50
									#%stop speckle%
									#%start speckle%
									261.19	62.381	1
									261.905	61.6667	2
									260.714	62.381	3
									260.714	62.381	4
									260.714	62.619	5
									260.714	62.619	6
									260.714	62.619	7
									261.905	62.619	8
									261.905	62.619	9
									261.905	62.619	10
									261.905	62.619	11
									262.857	62.381	12
									262.619	62.381	13
									261.905	62.381	14
									261.905	62.381	15
									261.905	62.381	16
									261.667	62.1429	17
									261.905	63.5714	18
									261.905	63.5714	19
									262.143	63.3333	20
[truncated: 707 more rows]
