# Supplementary material for: A mechanism with severing near barbed ends and annealing explains structure and dynamics of dendritic actin networks
Source: eLife journal article supplement (doi:10.7554/elife.69031), 2022-06-06
Supplement: supp [file elife-69031-supp-v2.zip › elife_poa_e69031_Figure_6_source_data_1.xlsx]

## Sheet: Sheet1
	cell1								cell2								cell3								cell4								cell5								cell6
	location		frame numbering from start to end	lifetime of each speckle (frame)	frequency with each lifetime				location		frame numbering from start to end	lifetime of each speckle (frame)	frequency with each lifetime				location		frame numbering from start to end	lifetime of each speckle (frame)	frequency with each lifetime				location		frame numbering from start to end	lifetime of each speckle (frame)	frequency with each lifetime				location		frame numbering from start to end	lifetime of each speckle (frame)	frequency with each lifetime				location		frame numbering from start to end	lifetime of each speckle (frame)	frequency with each lifetime
					lifetime (frame)	number of speckels	lifetime (s)						lifetime (frame)	number of speckels	lifetime (s)						lifetime (frame)	number of speckels	lifetime (s)						lifetime (frame)	number of speckels	lifetime (s)						lifetime (frame)	number of speckels	lifetime (s)						lifetime (frame)	number of speckels	lifetime (s)
	x	y							x	y							x	y							x	y							x	y							x	y
	#%start speckle%				1	0	0.1		#%start speckle%				1	0	0.1		#%start speckle%				1	0	0.1		#%start speckle%				1	0	0.1		#%start speckle%				1	0	0.1		#%start speckle%				1	0	0.1
	311.765	163.431	1		2	1	0.2		336	249.5	1		2	2	0.2		337.484	296.937	1		2	0	0.2		329.152	140.223	1		2	0	0.2		298.186	266.563	1		2	2	0.2		244.916	224.849	1		2	1	0.2
	311.903	163.813	2		3	1	0.3		336.326	249.648	2		3	2	0.3		337.263	297.082	2		3	0	0.3		329.032	140.057	2		3	2	0.3		298.511	266.539	2		3	2	0.3		244.68	225.059	2		3	0	0.3
	312.178	163.734	3		4	0	0.4		336.519	249.984	3		4	2	0.4		337.113	297.073	3		4	1	0.4		328.924	139.981	3		4	4	0.4		#%stop speckle%			2	4	1	0.4		244.681	225.243	3		4	0	0.4
	312.467	163.936	4		5	1	0.5		336.377	249.901	4		5	0	0.5		336.923	297.267	4		5	0	0.5		329.3	140.342	4		5	1	0.5		#%start speckle%				5	1	0.5		244.756	225.509	4		5	0	0.5
	312.374	164.108	5		6	0	0.6		336.699	250.594	5		6	1	0.6		336.6	297.316	5		6	3	0.6		#%stop speckle%			4	6	0	0.6		307.655	310.465	1		6	1	0.6		244.515	225.554	5		6	1	0.6
	312.515	164.338	6		7	0	0.7		336.519	250.633	6		7	0	0.7		336.168	297.484	6		7	0	0.7		#%start speckle%				7	0	0.7		307.933	310.518	2		7	2	0.7		244.581	226.282	6		7	0	0.7
	312.717	164.377	7		8	1	0.8		336.383	250.996	7		8	1	0.8		#%stop speckle%			6	8	0	0.8		338.441	105.934	1		8	1	0.8		308.001	310.349	3		8	0	0.8		244.438	226.221	7		8	2	0.8
	312.617	164.282	8		9	0	0.9		336.534	251.413	8		9	2	0.9		#%start speckle%				9	0	0.9		338.636	106.818	2		9	1	0.9		308.112	310.508	4		9	2	0.9		244.534	226.438	8		9	0	0.9
	312.529	164.487	9		10	1	1		336.25	251.048	9		10	0	1		305.913	256.861	1		10	0	1		338.225	105.484	3		10	1	1		308.279	310.453	5		10	0	1		244.435	226.712	9		10	0	1
	312.273	164.589	10		11	1	1.1		336.21	251.549	10		11	0	1.1		305.657	257.137	2		11	0	1.1		#%stop speckle%			3	11	0	1.1		308.386	310.407	6		11	0	1.1		244.29	226.735	10		11	0	1.1
	312.777	164.933	11		12	1	1.2		336.211	251.686	11		12	0	1.2		305.426	257.485	3		12	0	1.2		#%start speckle%				12	0	1.2		308.661	310.216	7		12	1	1.2		244.226	227.184	11		12	0	1.2
	313.029	164.864	12		13	0	1.3		336.166	251.875	12		13	0	1.3		305.305	257.828	4		13	1	1.3		377.873	283.242	1		13	0	1.3		308.685	310.162	8		13	0	1.3		244.28	227.248	12		13	0	1.3
	313.556	164.822	13		14	0	1.4		336.182	252.579	13		14	1	1.4		304.932	258	5		14	1	1.4		377.892	283.458	2		14	1	1.4		308.788	310.206	9		14	0	1.4		244.279	227.554	13		14	0	1.4
	313.31	164.956	14		15	0	1.5		336.028	252.357	14		15	0	1.5		305.035	258.236	6		15	1	1.5		378.21	283.423	3		15	0	1.5		308.795	310.184	10		15	0	1.5		244.206	227.809	14		15	0	1.5
	313.619	165.226	15		16	0	1.6		336.201	252.874	15		16	1	1.6		304.627	258.686	7		16	0	1.6		378.116	283.335	4		16	1	1.6		308.932	310.189	11		16	0	1.6		244.017	227.924	15		16	0	1.6
	313.533	165.199	16		17	0	1.7		335.932	252.972	16		17	0	1.7		304.461	258.45	8		17	0	1.7		#%stop speckle%			4	17	0	1.7		309.1	310.169	12		17	0	1.7		243.947	228.155	16		17	0	1.7
	313.607	165.381	17		18	2	1.8		336.137	253.467	17		18	1	1.8		304.374	258.763	9		18	0	1.8		#%start speckle%				18	0	1.8		309.192	310.14	13		18	1	1.8		243.957	228.348	17		18	0	1.8
	313.822	165.106	18		19	0	1.9		336.034	253.478	18		19	1	1.9		304.24	258.738	10		19	0	1.9		408.224	318.238	1		19	0	1.9		309.342	310.074	14		19	0	1.9		244.041	228.536	18		19	0	1.9
	313.689	165.281	19		20	0	2		335.958	253.638	19		20	0	2		303.917	259.05	11		20	0	2		407.772	318.177	2		20	0	2		309.63	309.737	15		20	0	2		243.833	228.732	19		20	0	2
	314.109	165.462	20		21	0	2.1		336.302	254.249	20		21	0	2.1		303.879	259.131	12		21	0	2.1		408.351	318.521	3		21	0	2.1		309.917	309.803	16		21	2	2.1		243.692	229.021	20		21	1	2.1
	314.057	165.567	21		22	0	2.2		336.059	254.383	21		22	1	2.2		303.622	259.233	13		22	1	2.2		408.592	318.541	4		22	0	2.2		309.877	309.686	17		22	0	2.2		243.548	229.366	21		22	0	2.2
	314.238	165.697	22		23	0	2.3		336.37	254.481	22		23	0	2.3		303.498	259.602	14		23	0	2.3		408.666	318.517	5		23	0	2.3		309.966	309.943	18		23	0	2.3		243.524	229.452	22		23	1	2.3
	314.441	165.937	23		24	0	2.4		336.041	255.004	23		24	1	2.4		303.432	259.652	15		24	0	2.4		408.704	318.406	6		24	0	2.4		#%stop speckle%			18	24	0	2.4		243.466	229.756	23		24	0	2.4
	314.538	165.716	24		25	0	2.5		335.693	255.022	24		25	1	2.5		303.274	259.759	16		25	0	2.5		408.649	318.665	7		25	0	2.5		#%start speckle%				25	0	2.5		243.436	229.894	24		25	0	2.5
	314.78	166.064	25		26	3	2.6		335.699	255.08	25		26	0	2.6		303.111	259.841	17		26	0	2.6		409.028	318.6	8		26	1	2.6		290.775	223.686	1		26	0	2.6		243.42	230.037	25		26	1	2.6
	314.75	165.938	26		27	1	2.7		335.666	255.339	26		27	1	2.7		302.832	260.209	18		27	0	2.7		408.484	318.104	9		27	0	2.7		290.834	223.7	2		27	1	2.7		243.455	230.307	26		27	0	2.7
	314.736	166.257	27		28	2	2.8		335.641	255.551	27		28	0	2.8		302.618	260.459	19		28	0	2.8		409.372	318.346	10		28	0	2.8		#%stop speckle%			2	28	0	2.8		243.257	230.395	27		28	1	2.8
	315.003	166.232	28		29	0	2.9		335.66	255.943	28		29	1	2.9		302.532	260.499	20		29	0	2.9		409.366	318.262	11		29	0	2.9		#%start speckle%				29	0	2.9		243.547	230.696	28		29	0	2.9
	314.985	166.24	29		30	0	3		335.723	256.15	29		30	1	3		302.278	260.601	21		30	0	3		409.369	318.317	12		30	0	3		288.392	149.363	1		30	0	3		#%stop speckle%			28	30	0	3
	315.319	166.622	30		31	0	3.1		335.6	256.527	30		31	0	3.1		302.095	260.816	22		31	1	3.1		409.25	318.292	13		31	0	3.1		288.263	149.391	2		31	0	3.1		#%start speckle%				31	0	3.1
	315.394	166.129	31		32	0	3.2		#%stop speckle%			30	32	1	3.2		301.94	261.049	23		32	0	3.2		409.276	318.162	14		32	0	3.2		288.424	149.461	3		32	0	3.2		424.227	327.678	1		32	0	3.2
	315.544	166.807	32		33	0	3.3		#%start speckle%				33	0	3.3		301.687	261.2	24		33	1	3.3		409.357	318.111	15		33	0	3.3		#%stop speckle%			3	33	0	3.3		424.007	327.774	2		33	0	3.3
	315.754	166.777	33		34	2	3.4		261.825	228.916	1		34	0	3.4		301.528	261.33	25		34	0	3.4		409.316	318.362	16		34	1	3.4		#%start speckle%				34	0	3.4		423.747	328.098	3		34	1	3.4
	316.406	166.924	34		35	0	3.5		261.727	228.857	2		35	0	3.5		301.307	261.569	26		35	0	3.5		#%stop speckle%			16	35	0	3.5		314.96	92.6365	1		35	0	3.5		423.675	328.266	4		35	1	3.5
	315.996	167.236	35		36	0	3.6		261.569	228.906	3		36	0	3.6		301.17	261.737	27		36	1	3.6		#%start speckle%				36	1	3.6		315.094	92.7028	2		36	1	3.6		423.657	328.215	5		36	1	3.6
	316.073	167.13	36		37	0	3.7		#%stop speckle%			3	37	0	3.7		300.945	261.738	28		37	0	3.7		322.727	168.182	1		37	0	3.7		315.281	92.8131	3		37	0	3.7		423.507	328.475	6		37	0	3.7
	316.101	167.264	37		38	1	3.8		#%start speckle%				38	0	3.8		301.045	262.057	29		38	0	3.8		323.636	168.182	2		38	2	3.8		315.42	92.8599	4		38	0	3.8		423.36	328.511	7		38	0	3.8
	315.695	167.146	38		39	0	3.9		136.135	244.824	1		39	0	3.9		300.536	262.3	30		39	0	3.9		323.182	168.636	3		39	0	3.9		315.506	92.8693	5		39	0	3.9		423.279	328.674	8		39	0	3.9
	#%stop speckle%			38	40	0	4		136.176	244.681	2		40	0	4		301.23	262.852	31		40	0	4		323.636	168.636	4		40	0	4		315.727	92.9602	6		40	0	4		423.101	328.699	9		40	0	4
	#%start speckle%				41	0	4.1		135.853	245.298	3		41	0	4.1		300.238	262.552	32		41	0	4.1		323.636	168.182	5		41	0	4.1		315.922	93.0973	7		41	1	4.1		423.025	328.846	10		41	0	4.1
	224.361	336.641	1		42	0	4.2		135.802	245.682	4		42	1	4.2		300.263	262.601	33		42	0	4.2		323.636	168.636	6		42	0	4.2		316.196	93.1853	8		42	0	4.2		423.397	329.106	11		42	0	4.2
	224.659	336.431	2		43	0	4.3		135.398	245.769	5		43	0	4.3		300.167	262.869	34		43	1	4.3		324.091	168.182	7		43	0	4.3		316.274	93.2366	9		43	0	4.3		422.72	329.217	12		43	0	4.3
	224.523	336.79	3		44	0	4.4		135.967	245.711	6		44	1	4.4		299.728	263.117	35		44	0	4.4		323.636	168.182	8		44	0	4.4		316.336	93.3359	10		44	0	4.4		422.653	329.258	13		44	0	4.4
	224.759	336.615	4		45	2	4.5		135.999	245.809	7		45	0	4.5		299.55	263.298	36		45	0	4.5		324.091	168.636	9		45	0	4.5		315.793	93.617	11		45	3	4.5		422.586	329.515	14		45	0	4.5
	224.992	336.671	5		46	0	4.6		136.029	246.033	8		46	0	4.6		299.454	263.366	37		46	0	4.6		324.091	168.182	10		46	1	4.6		316.719	93.5198	12		46	0	4.6		422.68	329.781	15		46	0	4.6
	225.149	336.755	6		47	0	4.7		136.001	246.451	9		47	0	4.7		299.198	263.568	38		47	1	4.7		#%stop speckle%			10	47	1	4.7		317.134	93.7472	13		47	0	4.7		422.338	330.075	16		47	0	4.7
	225.073	336.686	7		48	1	4.8		136.182	246.522	10		48	0	4.8		299.012	263.694	39		48	0	4.8		#%start speckle%				48	0	4.8		317.145	93.5479	14		48	0	4.8		422.116	329.946	17		48	0	4.8
	225.385	336.657	8		49	0	4.9		136.362	246.628	11		49	0	4.9		298.978	263.971	40		49	0	4.9		427.01	358.133	1		49	0	4.9		317.03	93.6937	15		49	0	4.9		422.102	330.068	18		49	0	4.9
	225.645	336.995	9		50	1	5		136.519	246.88	12		50	0	5		298.644	264.165	41		50	0	5		427.541	357.778	2		50	0	5		317.403	93.8245	16		50	0	5		422.242	330.394	19		50	0	5
	225.587	337.049	10		51	0	5.1		136.382	247.121	13		51	0	5.1		298.424	264.38	42		51	0	5.1		427.657	357.889	3		51	0	5.1		317.656	93.819	17		51	0	5.1		421.749	330.564	20		51	0	5.1
	225.728	336.727	11		52	0	5.2		136.501	247.327	14		52	0	5.2		298.155	264.555	43		52	0	5.2		427.785	357.632	4		52	0	5.2		317.697	93.9233	18		52	0	5.2		421.781	330.508	21		52	0	5.2
	225.924	336.631	12		53	0	5.3		136.469	247.558	15		53	0	5.3		297.934	264.729	44		53	0	5.3		428.648	358.193	5		53	0	5.3		317.822	93.9686	19		53	0	5.3		421.645	330.665	22		53	0	5.3
	226.092	336.799	13		54	0	5.4		136.519	247.671	16		54	0	5.4		297.752	264.902	45		54	1	5.4		428.115	357.625	6		54	0	5.4		317.966	93.9167	20		54	0	5.4		421.54	330.768	23		54	0	5.4
	226.345	336.793	14		55	0	5.5		136.676	247.771	17		55	0	5.5		297.631	265.246	46		55	0	5.5		428.199	357.378	7		55	0	5.5		318.141	94.1545	21		55	0	5.5		#%stop speckle%			23	55	0	5.5
	226.462	336.792	15		56	1	5.6		136.995	248.017	18		56	0	5.6		297.525	265.23	47		56	0	5.6		428.25	357.683	8		56	0	5.6		#%stop speckle%			21	56	0	5.6		#%start speckle%				56	0	5.6
	226.678	336.99	16		57	0	5.7		136.711	248.347	19		57	0	5.7		297.278	265.231	48		57	1	5.7		428.265	357.256	9		57	1	5.7		#%start speckle%				57	0	5.7		156.505	224.676	1		57	0	5.7
	226.625	337.136	17		58	0	5.8		136.733	248.6	20		58	0	5.8		297.069	265.509	49		58	0	5.8		428.319	357.201	10		58	0	5.8		306.663	97.51	1		58	0	5.8		156.152	224.685	2		58	0	5.8
	227.031	336.994	18		59	0	5.9		136.781	248.916	21		59	1	5.9		297.07	265.644	50		59	1	5.9		428.718	357.244	11		59	0	5.9		306.34	97.8915	2		59	0	5.9		156.099	224.979	3		59	1	5.9
	227.074	336.83	19		60	1	6		136.892	249.133	22		60	1	6		296.673	265.772	51		60	1	6		428.613	356.971	12		60	0	6		306.544	97.9972	3		60	0	6		156.201	225.153	4		60	0	6
	227.173	337.062	20		61	0	6.1		137.049	249.46	23		61	0	6.1		296.702	266.115	52		61	0	6.1		428.745	357.108	13		61	0	6.1		306.655	98.0965	4		61	0	6.1		156.229	225.412	5		61	0	6.1
	227.084	337.07	21		62	0	6.2		137.201	249.61	24		62	0	6.2		296.5	266.081	53		62	0	6.2		428.738	357.073	14		62	0	6.2		306.92	98.05	5		62	0	6.2		156.261	225.636	6		62	0	6.2
	227.235	337.043	22		63	0	6.3		137.18	249.832	25		63	0	6.3		296.405	266.297	54		63	0	6.3		428.917	356.873	15		63	0	6.3		307.21	98.1751	6		63	0	6.3		156.322	225.837	7		63	0	6.3
	227.659	336.992	23		64	0	6.4		137.144	250.133	26		64	0	6.4		296.321	266.377	55		64	0	6.4		428.727	356.796	16		64	0	6.4		307.402	98.1816	7		64	0	6.4		156.258	226.068	8		64	0	6.4
	227.865	337.055	24		65	0	6.5		137.469	250.242	27		65	0	6.5		296.005	266.502	56		65	0	6.5		428.842	356.486	17		65	0	6.5		307.369	98.3786	8		65	0	6.5		#%stop speckle%			8	65	0	6.5
	227.844	337.036	25		66	0	6.6		137.327	250.624	28		66	0	6.6		295.894	266.73	57		66	0	6.6		429.198	356.665	18		66	0	6.6		307.514	98.4301	9		66	0	6.6		#%start speckle%				66	0	6.6
	227.941	337.414	26		67	0	6.7		137.442	250.778	29		67	0	6.7		295.607	266.761	58		67	0	6.7		429.353	356.594	19		67	0	6.7		307.649	98.4235	10		67	0	6.7		362.283	290.05	1		67	0	6.7
	#%stop speckle%			26	68	0	6.8		137.476	251.112	30		68	0	6.8		295.534	266.818	59		68	0	6.8		429.25	356.537	20		68	0	6.8		307.638	98.5128	11		68	0	6.8		361.79	290.27	2		68	0	6.8
	#%start speckle%				69	0	6.9		137.563	251.125	31		69	0	6.9		295.36	267.23	60		69	0	6.9		429.358	356.64	21		69	0	6.9		308.052	98.5537	12		69	0	6.9		361.862	290.156	3		69	0	6.9
	321.388	152.261	1		70	0	7		137.707	251.508	32		70	0	7		#%stop speckle%			60	70	1	7		429.237	356.478	22		70	0	7		308.09	98.6502	13		70	0	7		361.927	290.666	4		70	0	7
	321.851	152.21	2		71	0	7.1		137.749	251.592	33		71	0	7.1		#%start speckle%				71	0	7.1		429.444	356.209	23		71	0	7.1		308.144	98.7762	14		71	0	7.1		361.554	290.746	5		71	0	7.1
	321.783	152.144	3		72	0	7.2		137.698	251.682	34		72	0	7.2		229.663	180.175	1		72	0	7.2		429.613	356.256	24		72	0	7.2		308.264	98.7899	15		72	0	7.2		361.339	290.657	6		72	0	7.2
	321.734	152.663	4		73	0	7.3		137.972	251.792	35		73	0	7.3		229.665	179.938	2		73	0	7.3		429.783	356.175	25		73	0	7.3		308.313	98.869	16		73	0	7.3		#%stop speckle%			6	73	0	7.3
	321.625	153.005	5		74	0	7.4		137.892	252.147	36		74	0	7.4		229.644	180.308	3		74	0	7.4		429.595	356.268	26		74	0	7.4		308.515	98.9651	17		74	0	7.4		#%start speckle%				74	0	7.4
	321.708	153.134	6		75	0	7.5		137.867	252.363	37		75	0	7.5		229.517	180.379	4		75	0	7.5		429.943	356.192	27		75	0	7.5		308.679	98.9883	18		75	0	7.5		396.46	296.235	1		75	0	7.5
	321.968	152.783	7		76	0	7.6		138.025	252.52	38		76	0	7.6		229.334	180.617	5		76	0	7.6		429.944	355.831	28		76	0	7.6		308.826	99.15	19		76	0	7.6		396.331	296.332	2		76	1	7.6
	322.162	153.045	8		77	0	7.7		138.111	252.657	39		77	0	7.7		229.287	180.847	6		77	0	7.7		429.825	355.96	29		77	0	7.7		308.917	99.0534	20		77	0	7.7		396.357	296.422	3		77	1	7.7
	322.256	152.805	9		78	0	7.8		138.235	252.911	40		78	0	7.8		229.079	181.007	7		78	0	7.8		430.207	355.849	30		78	0	7.8		308.988	99.1987	21		78	0	7.8		396.316	296.673	4		78	0	7.8
	322.379	152.969	10		79	0	7.9		138.272	253.016	41		79	0	7.9		228.924	181.205	8		79	0	7.9		430.341	355.84	31		79	0	7.9		309.183	99.1997	22		79	0	7.9		396.201	296.88	5		79	0	7.9
	322.438	153.139	11		80	0	8		138.275	253.245	42		80	0	8		228.816	181.112	9		80	0	8		430.473	355.866	32		80	0	8		309.384	99.2994	23		80	0	8		396.28	297.224	6		80	0	8
	322.331	153.315	12		81	0	8.1		138.331	253.352	43		81	0	8.1		228.69	181.423	10		81	0	8.1		430.397	355.636	33		81	0	8.1		309.401	99.3778	24		81	0	8.1		395.806	297.181	7		81	0	8.1
	322.601	153.372	13		82	0	8.2		138.437	253.52	44		82	0	8.2		228.571	181.688	11		82	0	8.2		430.308	355.944	34		82	0	8.2		309.543	99.3605	25		82	0	8.2		396.075	297.468	8		82	1	8.2
	322.544	153.448	14		83	0	8.3		138.513	253.669	45		83	0	8.3		228.364	181.767	12		83	0	8.3		430.681	355.448	35		83	0	8.3		309.729	99.4236	26		83	0	8.3		395.783	297.485	9		83	0	8.3
	322.516	153.582	15		84	0	8.4		138.522	253.957	46		84	0	8.4		228.463	182.306	13		84	0	8.4		430.654	355.586	36		84	0	8.4		309.892	99.5275	27		84	0	8.4		395.605	297.597	10		84	0	8.4
	322.162	153.966	16		85	0	8.5		138.615	253.984	47		85	0	8.5		#%stop speckle%			13	85	0	8.5		430.645	355.075	37		85	0	8.5		310.055	99.6244	28		85	0	8.5		395.457	297.636	11		85	0	8.5
	322.799	153.629	17		86	0	8.6		138.431	254.228	48		86	1	8.6		#%start speckle%				86	0	8.6		430.611	355.194	38		86	0	8.6		310.179	99.7423	29		86	0	8.6		395.339	297.693	12		86	0	8.6
	322.828	153.698	18		87	0	8.7		138.692	254.453	49		87	0	8.7		157.605	141.513	1		87	0	8.7		#%stop speckle%			38	87	0	8.7		310.271	99.6794	30		87	0	8.7		395.291	297.973	13		87	0	8.7
	322.757	153.817	19		88	0	8.8		138.767	254.669	50		88	0	8.8		157.643	141.667	2		88	0	8.8		#%start speckle%				88	0	8.8		310.461	99.6902	31		88	0	8.8		395.091	298.187	14		88	0	8.8
	322.837	153.935	20		89	0	8.9		138.79	254.972	51		89	0	8.9		157.392	141.791	3		89	0	8.9		354.759	250.214	1		89	0	8.9		310.551	99.788	32		89	0	8.9		394.998	298.294	15		89	0	8.9
	323.408	154.247	21		90	0	9		138.872	255.159	52		90	0	9		157.702	142.333	4		90	0	9		354.972	250.007	2		90	0	9		310.808	99.8523	33		90	0	9		395.07	298.39	16		90	0	9
	323.346	154.204	22		91	0	9.1		138.96	255.305	53		91	0	9.1		157.456	142.246	5		91	0	9.1		354.949	250.197	3		91	0	9.1		310.876	99.9779	34		91	0	9.1		395.032	298.498	17		91	0	9.1
	323.256	154.29	23		92	0	9.2		139.175	255.527	54		92	0	9.2		157.362	142.358	6		92	0	9.2		354.947	249.983	4		92	0	9.2		311.108	100.075	35		92	0	9.2		394.928	298.532	18		92	0	9.2
	323.39	154.454	24		93	0	9.3		139.141	255.73	55		93	0	9.3		157.372	142.672	7		93	0	9.3		354.98	249.916	5		93	0	9.3		311.287	100.118	36		93	0	9.3		394.73	298.774	19		93	0	9.3
	323.388	154.577	25		94	0	9.4		139.326	255.936	56		94	0	9.4		157.234	142.623	8		94	0	9.4		355.173	250.036	6		94	0	9.4		311.384	100.181	37		94	0	9.4		394.609	299.042	20		94	0	9.4
	323.756	154.528	26		95	0	9.5		139.487	256.098	57		95	0	9.5		157.014	143.237	9		95	0	9.5		355.226	249.961	7		95	0	9.5		311.487	100.194	38		95	0	9.5		394.619	299.123	21		95	0	9.5
	323.858	154.69	27		96	0	9.6		139.474	256.36	58		96	0	9.6		156.952	142.988	10		96	0	9.6		355.254	250.017	8		96	0	9.6		311.635	100.262	39		96	0	9.6		394.555	299.146	22		96	0	9.6
	323.901	154.668	28		97	0	9.7		139.454	256.556	59		97	0	9.7		156.971	143.259	11		97	0	9.7		355.295	250.03	9		97	0	9.7		311.758	100.309	40		97	0	9.7		394.287	299.38	23		97	0	9.7
	323.938	154.759	29		98	0	9.8		139.521	256.7	60		98	0	9.8		156.778	143.419	12		98	0	9.8		355.384	249.99	10		98	0	9.8		311.78	100.358	41		98	0	9.8		394.168	299.521	24		98	0	9.8
	323.939	154.712	30		99	0	9.9		139.613	256.78	61		99	0	9.9		156.82	143.806	13		99	0	9.9		355.436	249.923	11		99	0	9.9		312.032	100.533	42		99	0	9.9		394.281	299.569	25		99	0	9.9
	324.321	155.171	31		100	0	10		139.613	257.065	62		100	0	10		156.563	143.862	14		100	0	10		355.538	249.777	12		100	0	10		312.284	100.674	43		100	0	10		393.917	299.783	26		100	0	10
	324.009	155.504	32						139.574	257.235	63						156.535	144.067	15						355.683	249.826	13						312.338	100.669	44						393.904	300.439	27
	324.323	155.468	33						139.82	257.409	64						156.491	144.314	16						355.784	249.882	14						312.383	100.502	45						393.66	300.135	28
	324.182	155.28	34						139.914	257.667	65						156.401	144.418	17						355.757	249.945	15						#%stop speckle%			45					393.605	300.302	29
	324.191	155.397	35						139.922	257.825	66						156.205	144.643	18						356.15	249.619	16						#%start speckle%								393.571	300.411	30
	324.481	155.53	36						139.951	257.998	67						156.243	144.848	19						355.947	249.731	17						330.713	77.8877	1						393.522	300.542	31
	324.537	155.632	37						139.974	258.257	68						156.125	144.905	20						355.965	249.649	18						330.714	78.3856	2						393.469	300.876	32
	324.713	155.443	38						140.152	258.41	69						156.072	145.355	21						355.933	249.916	19						330.971	78.4499	3						393.472	300.97	33
	324.662	155.724	39						140.092	258.644	70						155.886	145.386	22						356.262	249.893	20						331.158	78.3936	4						393.346	301.211	34
	324.878	155.835	40						140.293	258.746	71						155.742	145.657	23						356.155	249.765	21						331.056	78.4961	5						392.993	301.157	35
	325.1	156.086	41						139.918	259.055	72						155.71	145.877	24						356.347	249.86	22						331.323	78.6299	6						392.858	301.22	36
	324.952	156.179	42						140.024	259.083	73						155.613	146.03	25						356.421	249.749	23						331.441	78.6325	7						392.856	301.422	37
	325.156	156.278	43						139.875	259.471	74						155.42	146.416	26						356.388	249.725	24						331.656	78.8401	8						392.664	301.558	38
	325.244	156.321	44						140.005	259.342	75						155.497	146.482	27						356.376	249.773	25						331.669	78.7776	9						392.483	301.801	39
	325.478	156.426	45						139.871	259.713	76						155.324	146.706	28						357.051	249.036	26						#%stop speckle%			9					392.479	301.722	40
	325.665	156.462	46						139.882	260.023	77						155.3	146.97	29						357.01	249.156	27						#%start speckle%								392.403	302.034	41
	325.432	156.777	47						140.19	260.187	78						155.067	147.205	30						356.843	249.517	28						294.567	108.287	1						392.357	302.092	42
	325.801	156.719	48						140.131	260.286	79						154.988	147.415	31						356.905	249.975	29						294.709	108.435	2						392.147	302.179	43
	325.988	156.807	49						140.484	260.566	80						154.775	147.667	32						356.456	249.821	30						294.926	108.404	3						392.076	302.243	44
	326.174	157.057	50						141.069	260.03	81						154.9	147.762	33						356.702	249.949	31						295.176	108.536	4						392.023	302.434	45
	#%stop speckle%			50					141.373	260.151	82						154.865	148.067	34						357.11	249.735	32						295.129	108.623	5						391.917	302.611	46
	#%start speckle%								141.238	260.392	83						154.611	148.278	35						356.934	249.74	33						295.313	108.502	6						391.816	302.841	47
	244.845	280.208	1						141.211	260.527	84						154.555	148.396	36						356.865	249.833	34						295.35	108.633	7						391.651	303.092	48
	244.95	280.554	2						141.577	260.813	85						154.527	148.685	37						357.154	249.634	35						295.547	108.581	8						391.591	303.134	49
	245.045	280.324	3						141.699	260.9	86						154.301	148.859	38						357.135	249.836	36						295.717	108.641	9						391.599	303.083	50
	245.141	280.229	4						#%stop speckle%			86					154.262	149.062	39						#%stop speckle%			36					296.012	108.613	10						391.337	303.358	51
	245.321	280.3	5						#%start speckle%								154.075	149.345	40						#%start speckle%								296.076	108.74	11						391.099	303.583	52
	245.45	280.339	6						344.264	245.167	1						154.073	149.47	41						368.348	271.082	1						296.344	108.779	12						391.266	303.751	53
	245.584	280.33	7						344.312	245.668	2						153.859	149.67	42						367.471	269.563	2						296.442	108.905	13						390.995	303.922	54
	245.611	280.365	8						344.231	245.731	3						153.795	149.799	43						367.987	269.555	3						296.501	109.003	14						391.027	304.05	55
	#%stop speckle%			8					344.582	246.273	4						153.686	149.863	44						368.111	269.473	4						296.736	109.105	15						390.925	304.142	56
	#%start speckle%								343.974	246.088	5						153.703	150.162	45						#%stop speckle%			4					296.895	109.024	16						390.823	304.314	57
	236.85	296.246	1						344.179	246.462	6						153.557	150.338	46						#%start speckle%								296.886	109.159	17						390.613	304.386	58
	236.955	296.596	2						344.201	246.594	7						153.5	150.5	47						323.745	170.246	1						297.037	109.146	18						390.426	304.561	59
	237.339	296.953	3						344.058	246.858	8						153.281	150.83	48						323.67	170.309	2						297.367	109.26	19						390.344	304.697	60
	237.606	296.686	4						344.201	247.332	9						153.26	150.895	49						323.702	170.423	3						297.434	109.093	20						390.387	304.84	61
	237.828	296.967	5						343.937	247.418	10						153.219	151.217	50						323.893	170.216	4						297.594	109.342	21						390.079	304.816	62
	238.056	296.969	6						343.837	247.848	11						153.065	151.424	51						324.049	170.223	5						297.602	109.217	22						390.12	305.203	63
	237.953	296.967	7						343.912	248.167	12						153.026	151.642	52						324.16	170.269	6						297.836	109.417	23						390.004	305.324	64
	238.2	296.981	8						344.155	248.311	13						152.883	151.785	53						324.202	170.193	7						298.117	109.392	24						389.923	305.434	65
	238.13	296.912	9						343.804	248.355	14						152.7	152.016	54						324.273	170.109	8						298.176	109.541	25						389.63	305.298	66
	238.302	296.838	10						343.941	248.696	15						#%stop speckle%			54					324.373	170.23	9						298.29	109.563	26						389.638	305.616	67
	238.695	296.841	11						343.868	248.839	16						#%start speckle%								324.422	170.208	10						298.442	109.599	27						389.513	305.795	68
	238.855	297.042	12						344.081	248.62	17						304.8	267.179	1						324.397	170.276	11						298.557	109.649	28						389.461	305.764	69
	#%stop speckle%			12					343.594	249.357	18						304.413	267.732	2						324.565	170.131	12						298.73	109.58	29						389.502	305.992	70
	#%start speckle%								343.509	249.495	19						304.351	267.566	3						324.685	170.286	13						298.845	109.743	30						389.381	305.98	71
	301.251	172.501	1						343.936	249.895	20						304.288	267.925	4						324.65	170.213	14						298.956	109.828	31						389.159	306.311	72
	301.534	172.754	2						344.471	249.797	21						303.631	268.267	5						324.769	170.206	15						299.109	109.951	32						388.964	306.615	73
	301.788	173.069	3						343.91	250.161	22						303.839	268.416	6						324.781	170.244	16						299.238	109.892	33						388.693	306.859	74
	301.96	173.207	4						343.768	250.436	23						303.245	268.918	7						324.649	169.9	17						299.236	110.007	34						388.693	306.825	75
	301.968	172.921	5						343.476	250.637	24						303.249	269.051	8						325	170.455	18						299.403	109.952	35						388.654	306.95	76
	302.004	173.261	6						343.556	250.97	25						303.07	269.098	9						324.973	170.373	19						299.616	109.875	36						#%stop speckle%			76
	302.115	173.232	7						343.727	250.894	26						302.595	269.252	10						325.274	170.115	20						298.705	110.087	37						#%start speckle%
	302.436	173.294	8						343.514	251.726	27						302.575	269.67	11						325.124	169.686	21						299.902	109.999	38						136.777	225.348	1
	302.508	173.789	9						343.743	251.53	28						302.478	269.832	12						325.052	169.776	22						299.835	110.276	39						136.979	225.263	2
	302.485	173.592	10						343.548	251.905	29						302.117	269.648	13						325.544	170.106	23						300.168	110.211	40						136.777	225.429	3
	302.68	173.694	11						343.553	252.061	30						302.072	270.139	14						325.38	169.911	24						300.202	110.35	41						136.692	225.823	4
	302.894	173.846	12						343.365	252.347	31						301.616	270.241	15						325.455	170.455	25						300.414	110.203	42						136.712	225.895	5
	302.682	173.819	13						343.284	252.701	32						301.649	270.259	16						325.366	169.723	26						300.348	110.426	43						136.858	226.128	6
	302.898	173.916	14						343.413	252.624	33						301.267	270.517	17						325.966	170.192	27						300.527	110.596	44						136.985	226.305	7
	303.12	174.205	15						343.517	253.174	34						301.157	270.716	18						325.8	170.282	28						300.456	110.506	45						136.574	226.621	8
	303.007	174.26	16						343.568	253.612	35						300.78	270.761	19						326.115	170.335	29						#%stop speckle%			45					#%stop speckle%			8
	303.277	174.364	17						343.174	253.704	36						300.622	271.027	20						326.274	170.315	30						#%start speckle%								#%start speckle%
	303.356	174.365	18						343.787	253.64	37						300.504	271.071	21						326.078	170.114	31						291.081	184.949	1						215.554	220.527	1
	303.273	174.393	19						343.1	253.963	38						300.47	271.413	22						326.216	170.108	32						291.039	185.109	2						215.379	220.487	2
	303.431	174.553	20						343.405	254.125	39						300.332	271.556	23						326.294	170.089	33						291.174	184.859	3						215.31	220.593	3
	303.598	174.601	21						342.914	254.697	40						300.08	271.596	24						326.212	170.04	34						#%stop speckle%			3					215.186	220.897	4
	303.763	174.727	22						342.84	254.605	41						299.778	271.818	25						326.291	170.191	35						#%start speckle%								215.118	220.954	5
	303.752	174.843	23						343.199	254.772	42						299.864	272.143	26						326.341	170.123	36						331.499	346.441	1						215.06	221.228	6
	303.971	175	24						343.175	255.119	43						299.75	272.424	27						326.441	170.089	37						331.64	346.436	2						214.97	221.57	7
	304.084	175.192	25						342.726	255.143	44						299.459	272.337	28						326.377	170.272	38						331.738	346.433	3						214.944	221.578	8
	304.32	175.187	26						342.994	255.249	45						299.242	272.515	29						#%stop speckle%			38					332.074	346.363	4						214.875	221.808	9
	304.317	175.377	27						342.892	255.509	46						299.206	272.715	30						#%start speckle%								332.165	346.367	5						214.952	222.163	10
	#%stop speckle%			27					343.204	255.926	47						298.799	272.924	31						417.302	346.602	1						332.397	346.276	6						214.851	222.367	11
	#%start speckle%								343.186	256.274	48						298.513	272.983	32						417.597	346.331	2						332.505	346.392	7						214.953	222.511	12
	217.691	374.229	1						342.983	256.485	49						298.286	273.191	33						417.668	346.116	3						#%stop speckle%			7					214.841	222.64	13
	217.835	374.317	2						342.219	256.576	50						298.277	273.523	34						417.637	346.29	4						#%start speckle%								214.883	222.972	14
	218.207	374.281	3						342.461	256.907	51						298.007	273.465	35						417.921	346.22	5						339.971	391.571	1						214.98	223.239	15
	218.012	374.161	4						342.775	257.418	52						297.724	273.592	36						417.949	345.804	6						340.181	391.136	2						214.704	223.327	16
	218.092	374.169	5						343.025	257.108	53						297.797	273.713	37						417.936	346.061	7						340.317	391.184	3						214.668	223.548	17
	218.298	374.444	6						342.655	257.613	54						297.471	273.788	38						418.244	345.891	8						340.536	391.21	4						214.685	223.633	18
	218.787	374.479	7						342.851	258.064	55						297.162	274.151	39						#%stop speckle%			8					#%stop speckle%			4					214.737	224.159	19
	218.988	374.491	8						342.433	258.416	56						297.223	274.498	40						#%start speckle%								#%start speckle%								214.748	224.368	20
	219.166	374.667	9						343.339	258.897	57						296.942	274.484	41						326.816	174.175	1						315.822	333.169	1						214.595	224.446	21
	219.175	374.516	10						342.962	259.642	58						296.808	274.61	42						327.096	173.948	2						316.284	332.86	2						214.594	224.602	22
	219.329	374.72	11						342.626	259.542	59						296.561	274.749	43						326.834	173.622	3						316.501	332.685	3						214.54	224.526	23
	#%stop speckle%			11					#%stop speckle%			59					296.275	274.637	44						326.966	173.798	4						316.577	332.621	4						214.58	225.239	24
	#%start speckle%								#%start speckle%								296.241	274.883	45						327.206	173.868	5						316.656	332.547	5						214.754	225.277	25
	286.011	198.647	1						324.935	246.844	1						296.076	275.137	46						327.175	173.836	6						316.778	332.441	6						214.538	225.448	26
	286.005	198.932	2						324.976	247.273	2						295.833	275.172	47						327.042	173.759	7						316.827	332.41	7						214.472	225.773	27
	286.8	198.796	3						325.14	247.481	3						295.689	275.457	48						327.423	173.769	8						316.86	332.533	8						214.503	225.913	28
	286.801	199.098	4						324.896	247.622	4						295.419	275.816	49						327.454	173.841	9						316.977	332.384	9						214.518	226.254	29
	286.758	199.105	5						324.89	247.796	5						295.233	276.068	50						327.441	173.722	10						317.078	332.401	10						214.331	226.334	30
	286.583	198.471	6						324.981	247.988	6						295.056	276.174	51						327.548	173.677	11						317.225	332.359	11						214.419	226.705	31
	286.657	198.56	7						324.815	248.176	7						294.665	276.446	52						327.636	173.653	12						317.324	332.321	12						214.403	227.015	32
	286.757	198.933	8						325.009	248.405	8						294.691	276.587	53						327.803	173.728	13						317.543	332.132	13						214.542	227.369	33
	286.964	198.925	9						325.209	248.608	9						294.301	276.927	54						327.8	173.73	14						317.654	332.131	14						214.684	227.429	34
	286.983	198.966	10						#%stop speckle%			9					294.223	276.849	55						327.954	173.461	15						317.802	332.088	15						214.494	227.549	35
	286.995	198.874	11						#%start speckle%								294.235	277.098	56						327.971	173.686	16						317.717	332.008	16						214.536	227.506	36
	287.265	198.907	12						370.227	250.701	1						293.597	277.117	57						328.13	173.558	17						318.126	332.107	17						#%stop speckle%			36
	287.294	199.297	13						369.556	250.987	2						293.588	277.39	58						328.144	173.754	18						318.282	331.994	18						#%start speckle%
	287.358	199.304	14						369.708	251.599	3						293.468	277.457	59						328.102	173.507	19						318.389	331.862	19						129.632	229.028	1
	287.561	199.549	15						369.494	251.554	4						293.445	277.63	60						328.161	173.686	20						318.628	331.759	20						129.616	229.233	2
	287.62	199.662	16						369.926	252.078	5						293.059	277.904	61						328.305	173.655	21						318.979	331.602	21						129.561	229.373	3
	287.777	199.872	17						369.498	251.883	6						292.85	277.895	62						328.339	173.484	22						319.172	331.597	22						129.681	229.618	4
	288.029	199.686	18						369.952	252.254	7						292.613	278.217	63						328.611	173.528	23						319.29	331.524	23						129.684	229.792	5
	288.185	199.813	19						369.6	252.199	8						292.455	278.152	64						328.556	173.575	24						319.404	331.482	24						129.643	229.988	6
	287.954	200.158	20						369.504	252.539	9						292.259	278.44	65						328.61	173.533	25						319.53	331.409	25						129.491	230.159	7
	288.279	200	21						369.469	252.901	10						292.226	278.512	66						328.494	173.531	26						319.743	331.197	26						129.646	230.361	8
	288.441	200.207	22						369.484	253.003	11						291.885	278.618	67						#%stop speckle%			26					319.884	331.098	27						129.747	230.712	9
	288.396	200.356	23						369.424	253.302	12						291.778	278.812	68						#%start speckle%								320.048	331.237	28						129.636	230.951	10
	288.453	200.134	24						369.456	253.567	13						291.52	278.945	69						327.537	203.178	1						320.097	331.074	29						129.706	231.297	11
	288.607	200.404	25						369.177	253.594	14						291.56	279.29	70						327.393	202.744	2						320.451	330.953	30						129.552	231.493	12
	288.628	200.273	26						369.161	253.954	15						#%stop speckle%			70					327.759	202.408	3						320.408	330.607	31						129.639	231.507	13
	288.598	200.115	27						368.978	254.717	16						#%start speckle%								327.729	202.733	4						320.654	330.817	32						129.924	231.682	14
	288.67	200.293	28						369.5	254.5	17						177.295	152.841	1						327.767	202.758	5						320.769	330.675	33						129.993	231.776	15
	288.858	200.123	29						369.5	254.5	18						177.301	152.879	2						327.73	202.808	6						320.841	330.616	34						129.838	232.359	16
	288.675	200.613	30						369	255	19						176.881	153.334	3						327.786	202.983	7						320.987	330.463	35						129.827	232.614	17
	289.241	200.659	31						369.5	255.5	20						177.103	153.534	4						328.153	202.709	8						321.067	330.429	36						129.835	232.775	18
	289.306	200.826	32						369	255.5	21						177.198	153.697	5						328.02	202.566	9						321.215	330.399	37						129.826	233.02	19
	289.504	200.877	33						369.5	256	22						176.841	153.577	6						327.951	202.44	10						321.45	330.34	38						130.105	233.081	20
	289.531	201.145	34						369.5	256.5	23						176.863	153.796	7						328.131	203.016	11						321.465	330.368	39						129.961	233.255	21
	289.615	201.184	35						369	256.5	24						176.769	154.079	8						328.242	202.639	12						321.697	330.237	40						130.051	233.367	22
	289.692	201.33	36						369	256.5	25						176.495	154.336	9						328.142	202.609	13						321.771	330.24	41						130.01	233.503	23
	289.857	201.275	37						369	257	26						176.514	154.467	10						328.283	202.782	14						#%stop speckle%			41					129.994	233.798	24
	290.052	201.254	38						369	257.5	27						176.358	154.774	11						328.312	202.798	15						#%start speckle%								130.023	233.996	25
	289.612	201.611	39						368.5	257.5	28						176.311	154.793	12						328.317	202.484	16						322.565	321.531	1						130.061	234.263	26
	290.091	201.49	40						369	258	29						176.25	154.932	13						328.364	202.594	17						322.234	321.013	2						#%stop speckle%			26
	290.343	201.7	41						369	258	30						176.077	155.144	14						328.419	202.473	18						322.267	321.29	3						#%start speckle%
	290.696	201.92	42						368.5	258.5	31						175.967	155.352	15						328.827	202.703	19						322.695	321.407	4						266.544	229.906	1
	290.601	201.962	43						368.5	258.5	32						176.123	155.515	16						328.63	202.421	20						322.699	321.278	5						265.712	229.867	2
	290.918	202.085	44						369	258	33						175.843	155.724	17						328.893	202.621	21						322.754	321.004	6						265.624	230.271	3
	290.881	201.858	45						369	258.5	34						175.772	155.809	18						328.884	202.556	22						322.79	320.942	7						265.779	230.467	4
	290.59	202.335	46						369	259	35						175.718	155.886	19						328.99	202.495	23						322.886	320.886	8						265.763	230.583	5
	290.847	202.936	47						368.5	259.5	36						175.595	156.288	20						329.077	202.475	24						323.049	320.817	9						265.366	230.749	6
	290.939	202.543	48						368.5	260	37						175.571	156.435	21						328.967	202.315	25						323.115	320.762	10						265.156	231.111	7
	291.359	202.325	49						368.5	259.5	38						175.396	156.721	22						329.224	202.5	26						323.226	320.781	11						265.7	231.132	8
	291.195	202.497	50						368.5	259.5	39						175.432	156.889	23						329.105	202.452	27						323.326	320.72	12						265.264	231.546	9
	291.415	202.729	51						368.5	260	40						175.201	156.902	24						329.159	202.233	28						323.385	320.707	13						265.316	231.644	10
	291.484	202.882	52						368.5	260	41						175.335	157.159	25						329.268	202.274	29						323.447	320.682	14						265.106	231.694	11
	291.856	203.109	53						368.137	260.497	42						175.018	157.357	26						329.536	202.351	30						324.272	320.481	15						265.101	231.846	12
	291.605	203.015	54						368	261	43						174.929	157.602	27						329.413	202.456	31						324.292	320.444	16						264.884	232.251	13
	291.823	203.283	55						368	261.5	44						174.767	157.824	28						329.441	202.416	32						324.352	320.378	17						264.928	232.622	14
	291.848	203.407	56						#%stop speckle%			44					174.613	157.932	29						329.513	202.397	33						324.447	320.377	18						264.969	232.681	15
	292.327	203.71	57						#%start speckle%								174.534	158.17	30						329.477	202.509	34						324.567	320.423	19						264.748	232.837	16
	292.424	203.364	58						118.147	260.385	1						174.616	158.341	31						329.773	202.332	35						324.651	320.349	20						264.805	232.89	17
	292.421	203.299	59						118.929	260.484	2						174.407	158.527	32						329.78	202.469	36						324.772	320.416	21						264.625	233.127	18
	292.519	203.454	60						118.541	260.802	3						174.31	158.712	33						329.984	202.256	37						#%stop speckle%			21					264.612	233.115	19
	#%stop speckle%			60					118.865	261.158	4						174.335	159.006	34						329.831	202.246	38						#%start speckle%								264.463	233.574	20
	#%start speckle%								118.762	261.045	5						174.126	158.998	35						329.997	202.233	39						294.577	107.53	1						264.431	233.401	21
	220.253	333.301	1						118.61	260.997	6						173.939	159.479	36						330.174	202.214	40						294.611	107.246	2						264.481	234.012	22
	220.183	333.229	2						118.695	261.461	7						173.88	159.639	37						330.1	202.254	41						294.782	107.245	3						264.667	234.333	23
	220.239	333.417	3						118.966	261.746	8						173.786	159.848	38						329.939	202.342	42						294.823	107.215	4						264.127	234.07	24
	220.527	333.428	4						118.71	261.852	9						173.795	159.984	39						330.167	202.349	43						294.995	107.391	5						264	235.333	25
	220.871	333.649	5						118.726	261.809	10						173.669	160.103	40						330.188	202.221	44						295.156	107.506	6						264.103	234.919	26
	220.891	333.452	6						119.414	262.278	11						173.365	160.515	41						330.333	202.043	45						295.344	107.467	7						263.983	234.993	27
	221.115	333.776	7						119.176	262.303	12						173.466	160.761	42						330.409	202.135	46						295.495	107.511	8						263.775	234.993	28
	221.277	333.721	8						119.118	262.661	13						173.115	160.667	43						330.505	202.21	47						295.623	107.57	9						263.912	235.545	29
	221.452	333.701	9						118.753	262.466	14						173.425	161.046	44						330.669	202.308	48						295.828	107.582	10						263.945	235.574	30
	221.417	333.621	10						119.238	262.556	15						173.244	161.239	45						330.448	202.278	49						295.907	107.596	11						263.667	236	31
	221.767	333.757	11						119.261	262.629	16						173.244	161.557	46						330.758	202.289	50						296.281	107.667	12						264	236.333	32
	221.778	333.714	12						119.528	263.22	17						172.908	161.477	47						330.763	202.111	51						296.423	107.669	13						264	236.333	33
	221.799	333.801	13						119.53	263.247	18						172.814	161.7	48						330.894	202.057	52						296.589	107.79	14						263.333	236.667	34
	222.067	333.821	14						119.754	263.691	19						172.674	161.922	49						330.817	202.153	53						296.624	107.842	15						263.333	236.667	35
	222.272	333.737	15						119.726	263.813	20						172.875	162.258	50						330.887	201.903	54						296.843	107.861	16						263.333	237.333	36
	222.348	333.798	16						119.52	264.102	21						172.666	162.123	51						330.948	202.016	55						297.03	107.974	17						263.333	237.333	37
	222.424	333.832	17						119.863	264.165	22						172.498	162.4	52						331.278	202.315	56						297.19	108.048	18						263.333	237.667	38
	222.516	333.81	18						120.217	264.076	23						172.228	162.629	53						331.362	202.209	57						297.287	108.158	19						263.667	237.333	39
	222.602	333.855	19						120.202	264.731	24						172.252	162.736	54						#%stop speckle%			57					297.453	108.144	20						263.333	238	40
	222.847	333.926	20						120.414	264.665	25						172.147	163.053	55						#%start speckle%								297.589	108.16	21						263.333	238	41
	223.09	334.283	21						120.439	264.737	26						171.968	163.138	56						358.154	265.002	1						297.776	108.281	22						263	238.667	42
	223.245	333.877	22						120.429	264.914	27						171.888	163.535	57						358.468	264.697	2						298.044	108.286	23						263	238.667	43
	223.268	334.064	23						120.341	265.008	28						#%stop speckle%			57					358.556	264.669	3						298.239	108.436	24						262.667	238.333	44
	223.51	334.183	24						120.532	265.169	29						#%start speckle%								358.6	264.526	4						298.349	108.438	25						263.333	239.333	45
	223.761	333.844	25						#%stop speckle%			29					237.806	192.515	1						358.67	264.562	5						298.548	108.45	26						263.333	239.333	46
	223.568	334.098	26						#%start speckle%								237.528	192.539	2						358.786	264.447	6						298.723	108.45	27						263	239	47
	223.822	333.976	27						261.124	228.42	1						237.474	192.682	3						358.913	264.473	7						298.812	108.59	28						263	239.667	48
	223.996	333.914	28						260.91	228.469	2						237.486	192.867	4						358.984	264.527	8						298.85	108.69	29						263.333	239	49
	224.134	333.785	29						261.155	228.815	3						237.341	193.099	5						358.903	264.42	9						299.195	108.717	30						263	239.333	50
	224.157	333.802	30						260.98	228.898	4						237.118	193.401	6						358.822	264.427	10						299.455	108.738	31						263	240	51
	224.322	333.762	31						261.003	229.166	5						236.952	193.446	7						359.077	264.424	11						299.623	108.953	32						263.333	240	52
	224.342	333.861	32						261.034	229.41	6						236.874	193.771	8						359.182	264.526	12						299.585	108.89	33						262.333	240	53
	224.421	333.844	33						261.143	229.459	7						236.724	193.682	9						359.214	264.335	13						299.8	109.181	34						262	239.667	54
	224.779	333.796	34						261.041	229.806	8						236.637	193.985	10						359.235	264.347	14						299.67	108.992	35						262.667	240	55
	225.052	333.701	35						261.058	229.972	9						236.471	194.198	11						359.442	264.219	15						300.093	109.129	36						263	241	56
	225.107	333.646	36						261.369	230.163	10						236.233	194.262	12						359.494	264.387	16						300.177	109.191	37						262.667	241	57
	225.353	333.997	37						261.176	230.422	11						235.921	194.669	13						359.535	264.097	17						300.263	109.214	38						263	241.667	58
	225.701	333.539	38						261.278	230.705	12						236.082	194.862	14						359.659	264.253	18						300.345	109.38	39						262.667	241.333	59
	226.034	333.531	39						261.321	230.92	13						235.759	195.124	15						359.707	264.245	19						300.565	109.74	40						262.667	241.667	60
	225.864	333.614	40						261.365	231.292	14						235.749	195.212	16						359.734	264.132	20						300.658	109.496	41						261.667	242	61
	225.999	333.79	41						261.475	231.253	15						235.872	195.32	17						359.889	264.113	21						300.906	109.374	42						262	241.333	62
	226.108	333.828	42						261.481	231.731	16						235.448	195.426	18						359.794	264.057	22						300.97	109.471	43						262.333	242	63
	226.11	333.852	43						261.5	231.903	17						235.316	195.565	19						360.029	264.105	23						301.215	109.549	44						262.333	242.333	64
	226.455	333.765	44						261.66	232.155	18						235.097	195.675	20						359.874	264.035	24						301.092	109.47	45						262	242.333	65
	226.415	333.681	45						261.477	232.382	19						235.298	195.943	21						360.036	264.093	25						#%stop speckle%			45					261.667	242.667	66
	#%stop speckle%			45					#%stop speckle%			19					234.924	196.178	22						360.196	264.016	26						#%start speckle%								262	243	67
	#%start speckle%								#%start speckle%								234.624	196.307	23						360.149	263.871	27						314.852	341.717	1						262	243	68
	305.707	184.294	1						418.923	273.564	1						234.647	196.389	24						360.25	263.828	28						314.618	341.766	2						262	242.667	69
	305.969	184.787	2						418.879	273.911	2						234.527	196.651	25						360.385	263.841	29						314.961	341.728	3						262	243.667	70
	307.227	183.529	3						418.664	274.337	3						234.402	196.719	26						359.919	263.383	30						314.994	341.699	4						261.667	244	71
	#%stop speckle%			3					418.413	274.559	4						234.339	196.899	27						360.336	263.713	31						315.242	341.668	5						261.333	243.333	72
	#%start speckle%								418.328	274.585	5						234.027	196.985	28						360.623	263.802	32						315.395	341.496	6						261.333	244	73
	219.191	372.801	1						418.167	274.954	6						233.849	197.264	29						360.622	263.832	33						315.634	341.534	7						261	244.333	74
	219.015	372.644	2						418.06	275.165	7						233.775	197.237	30						360.828	263.305	34						315.961	341.425	8						261.667	245	75
	219.004	372.771	3						417.857	275.409	8						233.698	197.725	31						#%stop speckle%			34					316.146	341.489	9						261.333	244.667	76
	219.348	372.912	4						417.618	275.576	9						#%stop speckle%			31					#%start speckle%								#%stop speckle%			9					261.333	244.333	77
	219.282	372.85	5						417.809	275.856	10						#%start speckle%								408.834	331.193	1						#%start speckle%								#%stop speckle%			77
	219.517	373.164	6						417.471	275.884	11						163.72	148.088	1						409.123	331.64	2						320.203	90.2591	1						#%start speckle%
	219.75	373.117	7						417.29	276.445	12						163.709	148.479	2						409.268	331.434	3						320.308	90.3397	2						435.033	337.208	1
	219.871	373.012	8						417.12	276.77	13						163.632	148.353	3						409.45	331.114	4						320.444	90.4712	3						434.689	337.339	2
	220.111	373.183	9						417.192	276.762	14						163.476	148.603	4						409.64	331.253	5						320.662	90.4904	4						434.819	337.259	3
	220.396	372.862	10						417.217	277.368	15						163.428	148.818	5						409.471	331.13	6						320.876	90.6998	5						434.83	337.727	4
	220.573	373.102	11						416.866	277.436	16						163.374	148.91	6						409.763	331.029	7						321.16	90.634	6						434.562	337.83	5
	220.614	372.897	12						416.88	277.636	17						163.294	149.253	7						410	331.111	8						#%stop speckle%			6					434.283	337.945	6
	220.994	373.045	13						416.492	277.911	18						163.156	149.317	8						410	331.111	9						#%start speckle%								434.193	338.054	7
	220.918	372.815	14						416.562	278.033	19						163.03	149.527	9						410	331.111	10						303.124	181.721	1						434.095	338.159	8
	221.076	373.082	15						416.311	278.262	20						162.988	149.729	10						410	330.556	11						303.285	181.889	2						433.97	338.169	9
	221.218	373.066	16						416.253	278.47	21						162.747	149.958	11						410.556	330	12						303.472	181.868	3						433.867	338.263	10
	221.509	373.232	17						416.173	278.759	22						162.637	150.272	12						410.556	330.556	13						303.623	182.044	4						433.463	338.578	11
	221.604	373.078	18						415.838	279.165	23						162.63	150.368	13						410.556	330	14						303.768	182.258	5						433.87	338.66	12
	#%stop speckle%			18					415.896	279.407	24						162.478	150.506	14						410	330	15						303.91	182.014	6						433.598	338.809	13
	#%start speckle%								415.746	279.757	25						162.158	150.683	15						410.556	330.556	16						304.187	182.261	7						433.473	338.895	14
	224.456	349.675	1						415.713	279.773	26						162.366	150.875	16						410.556	330	17						304.161	182.09	8						433.379	338.986	15
	223.929	350.357	2						415.426	280.158	27						162.097	151.074	17						410	329.444	18						304.389	182.031	9						433.234	339.217	16
	224.629	350.355	3						415.167	280.275	28						162.037	151.121	18						410.556	330	19						304.59	182.118	10						432.997	339.475	17
	224.286	351.071	4						415.35	280.581	29						161.822	151.336	19						410.556	329.444	20						304.718	182.323	11						432.985	339.675	18
	224.643	350	5						415.174	280.798	30						161.76	151.637	20						411.667	330	21						304.655	182.449	12						432.862	339.703	19
	224.286	350.714	6						414.969	280.935	31						161.745	151.752	21						411.667	330	22						#%stop speckle%			12					432.836	339.908	20
	225	350.357	7						414.843	281.159	32						161.627	151.965	22						411.667	329.444	23						#%start speckle%								432.825	340.129	21
	224.643	350.357	8						414.759	281.542	33						161.452	152.145	23						411.111	330	24						313.921	176.476	1						432.612	340.292	22
	225	350	9						414.622	281.787	34						161.359	152.514	24						411.257	329.524	25						314.132	176.215	2						432.281	341.158	23
	225.357	350	10						414.428	281.914	35						161.335	152.609	25						411.512	329.546	26						314.361	176.496	3						432.445	340.101	24
	225.357	349.643	11						414.15	282.429	36						161.095	152.653	26						411.414	329.393	27						314.188	176.4	4						431.927	340.131	25
	225.357	350.357	12						414.259	282.31	37						161.194	152.86	27						411.718	329.263	28						314.519	176.526	5						431.725	340.872	26
	225.714	350.714	13						413.931	282.637	38						161.169	153.128	28						411.586	329.302	29						#%stop speckle%			5					432.066	340.957	27
	225.714	350.357	14						414.099	282.856	39						161.065	153.552	29						411.952	329.276	30						#%start speckle%								432.05	341.277	28
	226.071	350.357	15						413.852	283.001	40						160.91	153.39	30						411.814	329.437	31						286.533	160.173	1						431.836	341.333	29
	226.071	350.357	16						413.72	283.533	41						160.895	153.594	31						411.97	329.072	32						286.737	160.2	2						431.638	341.285	30
	226.429	350	17						413.55	283.628	42						160.78	153.97	32						411.947	329.243	33						287.105	160.218	3						431.608	341.448	31
	226.071	350	18						#%stop speckle%			42					160.578	154.183	33						412.045	328.953	34						287.272	160.254	4						431.31	341.545	32
	226.429	350.357	19						#%start speckle%								160.457	154.33	34						412.151	328.885	35						287.385	160.214	5						431.324	341.656	33
	227.143	350.357	20						374.731	253.513	1						160.395	154.414	35						412.228	328.876	36						287.519	160.3	6						431.094	341.597	34
	226.786	350.714	21						374.43	253.919	2						160.265	154.681	36						412.237	328.9	37						287.843	160.375	7						430.902	342	35
	227.143	350	22						374.623	253.902	3						160.278	154.882	37						412.51	328.82	38						#%stop speckle%			7					431.099	342.23	36
	227.5	350.714	23						374.69	253.805	4						159.993	155.012	38						412.503	328.795	39						#%start speckle%								430.913	342.242	37
	227.5	350.714	24						374.479	254.338	5						159.954	155.225	39						412.564	328.667	40						293.329	184.153	1						430.792	342.389	38
	227.143	350.357	25						374.55	254.599	6						159.79	155.464	40						412.671	328.59	41						293.409	183.801	2						430.609	342.337	39
	227.143	350.357	26						374.443	254.59	7						159.739	155.599	41						412.702	328.455	42						293.82	183.841	3						430.354	342.516	40
	227.857	350.357	27						374.448	254.683	8						159.652	155.837	42						412.808	328.412	43						293.728	183.696	4						430.123	342.743	41
	227.857	350.714	28						374.05	255.052	9						159.651	155.93	43						412.891	328.279	44						293.907	183.807	5						430.265	342.915	42
	227.5	350.357	29						374.171	255.44	10						159.536	156.33	44						413.005	328.301	45						294.164	183.823	6						429.866	342.935	43
	228.214	351.071	30						374.167	255.821	11						159.435	156.484	45						413.13	328.266	46						294.302	183.924	7						429.984	343.243	44
	227.5	350.357	31						374.207	256.104	12						159.276	156.573	46						413.21	328.316	47						294.475	183.751	8						429.97	343.445	45
	228.083	350.463	32						374.069	256.356	13						159.198	156.878	47						#%stop speckle%			47					294.477	183.894	9						429.827	343.382	46
	228.256	349.826	33						373.996	256.679	14						#%stop speckle%			47					#%start speckle%								294.639	183.905	10						429.582	343.539	47
	228.525	350.253	34						374.471	256.489	15						#%start speckle%								455.968	391.865	1						294.768	183.903	11						429.498	343.514	48
	228.214	350.714	35						374.122	257.194	16						194.657	170.401	1						456.248	391.748	2						294.873	184.011	12						429.306	343.689	49
	228.853	350	36						373.474	257.519	17						195	170.075	2						456.15	391.858	3						295.095	183.87	13						429.277	343.851	50
	229.407	350.244	37						373.497	257.732	18						195.214	170.509	3						456.53	391.997	4						295.309	183.824	14						429.099	344.057	51
	229.294	350.347	38						#%stop speckle%			18					194.859	170.683	4						#%stop speckle%			4					295.484	183.852	15						429.037	344.104	52
	229.718	350.283	39						#%start speckle%								194.776	171.028	5						#%start speckle%								295.653	183.814	16						428.993	344.323	53
	229.36	350.213	40						258.424	231.771	1						194.479	171.265	6						335.327	118.519	1						295.914	183.798	17						428.913	344.32	54
	229.441	350.308	41						258.451	232.103	2						#%stop speckle%			6					335.389	118.614	2						296.034	183.96	18						428.677	344.498	55
	229.948	350.224	42						258.62	232.537	3						#%start speckle%								335.556	118.482	3						296.243	183.976	19						428.555	344.523	56
	229.955	350.439	43						258.606	232.572	4						213.918	168.014	1						335.525	118.586	4						296.33	183.963	20						428.461	344.843	57
	229.783	350.049	44						258.752	232.73	5						213.695	168.065	2						335.632	118.741	5						296.494	184.062	21						428.513	344.8	58
	230.071	350.419	45						258.704	233.174	6						213.624	168.38	3						#%stop speckle%			5					296.698	183.933	22						428.285	345.084	59
	#%stop speckle%			45					258.724	233.443	7						213.226	168.584	4						#%start speckle%								296.791	184.148	23						428.239	345.139	60
	#%start speckle%								258.718	233.684	8						213.259	168.896	5						444.486	391.288	1						296.969	183.96	24						428.137	345.263	61
	297.902	181.479	1						258.817	233.663	9						213.194	169.151	6						445.373	391.242	2						297.094	183.994	25						427.958	345.468	62
	298.103	181.627	2						258.621	233.596	10						213.071	169.371	7						445.462	390.889	3						297.168	183.91	26						427.838	345.533	63
	298.32	181.839	3						258.822	234.035	11						212.665	169.546	8						445.466	390.621	4						297.294	184.046	27						427.721	345.655	64
	298.29	182.029	4						258.822	234.541	12						212.638	169.616	9						445.368	390.408	5						#%stop speckle%			27					427.478	345.761	65
	298.304	181.979	5						258.931	234.531	13						212.561	169.939	10						445.323	390.616	6						#%start speckle%								427.487	345.906	66
	298.396	182.077	6						258.89	234.797	14						212.522	170.085	11						445.571	390.423	7						323.555	366.564	1						427.368	346.129	67
	298.548	182.155	7						259.147	235.09	15						212.403	170.197	12						445.518	390.296	8						323.214	366.786	2						427.127	346.237	68
	298.604	182.283	8						258.697	235.133	16						211.936	170.144	13						445.662	390.533	9						323.31	366.535	3						427.034	346.232	69
	298.725	182.36	9						#%stop speckle%			16					211.899	170.28	14						445.881	390.263	10						323.451	366.57	4						427.116	346.48	70
	298.797	182.427	10						#%start speckle%								211.793	170.535	15						446.001	390.112	11						323.562	366.399	5						426.778	346.475	71
	298.913	182.536	11						392.759	258.933	1						211.6	170.73	16						446.134	390.072	12						323.548	366.293	6						426.575	346.798	72
	298.997	182.83	12						392.461	259.217	2						211.52	170.914	17						445.857	390.053	13						323.68	366.268	7						426.665	346.875	73
	299.103	182.905	13						392.421	259.366	3						211.346	171.167	18						446.289	389.852	14						323.719	366.28	8						426.305	346.986	74
	299.208	183.039	14						392.249	259.646	4						211.222	171.198	19						446.383	389.901	15						323.993	366.226	9						426.253	347.163	75
	299.507	183.102	15						392.166	259.909	5						211.161	171.278	20						446.381	389.81	16						324.11	366.279	10						426.162	347.445	76
	299.546	183.168	16						392.208	260.116	6						211.131	171.502	21						446.199	389.571	17						324.301	366.076	11						426.065	347.533	77
	299.669	183.245	17						392.012	260.421	7						211.042	171.758	22						446.284	389.58	18						324.471	365.899	12						425.974	347.494	78
	299.737	183.237	18						391.935	260.833	8						210.974	171.989	23						446.46	389.362	19						324.573	366.12	13						425.944	347.701	79
	299.862	183.374	19						#%stop speckle%			8					210.801	172.16	24						446.713	389.427	20						324.63	365.75	14						425.451	347.967	80
	299.936	183.53	20						#%start speckle%								210.621	172.375	25						446.853	389.067	21						324.744	365.808	15						425.445	348.004	81
	300.024	183.593	21						188.728	221.431	1						210.516	172.568	26						446.57	389.065	22						325.009	365.537	16						425.417	348.242	82
	300.146	183.708	22						188.429	221.199	2						210.284	172.459	27						446.825	388.827	23						325.123	365.568	17						#%stop speckle%			82
	300.187	183.779	23						#%stop speckle%			2					209.893	172.529	28						447.163	388.672	24						325.14	365.477	18						#%start speckle%
	300.354	184.023	24						#%start speckle%								209.852	172.654	29						447.222	388.793	25						325.365	365.402	19						339.185	254.541	1
	300.503	184.026	25						427.847	287.927	1						209.741	172.896	30						447.298	388.41	26						325.483	365.381	20						339.164	254.373	2
	300.535	184.076	26						427.606	288.602	2						209.713	173.031	31						447.169	388.572	27						325.576	365.316	21						339.012	254.493	3
	300.603	184.176	27						427.485	288.519	3						209.655	173.261	32						447.374	388.488	28						325.746	365.204	22						338.958	254.654	4
	300.717	184.277	28						427.18	288.703	4						209.487	173.503	33						447.652	388.378	29						326.465	365.146	23						338.84	254.749	5
	300.882	184.343	29						427.276	289.098	5						#%stop speckle%			33					447.65	388.244	30						325.956	364.688	24						338.743	255.036	6
	301.022	184.488	30						426.977	289.4	6						#%start speckle%								447.764	387.95	31						326.313	364.82	25						338.665	255.147	7
	301.183	184.632	31						426.683	289.762	7						283.601	228.818	1						447.677	387.916	32						326.383	364.917	26						338.595	255.28	8
	301.111	184.511	32						426.648	289.646	8						283.433	228.709	2						447.839	387.968	33						326.724	364.69	27						338.421	255.462	9
	301.455	184.84	33						426.506	289.99	9						283.359	228.964	3						448.106	387.719	34						326.714	364.568	28						338.298	255.595	10
	301.385	184.899	34						426.475	289.946	10						283.147	229.082	4						448.122	387.683	35						326.991	364.446	29						338.247	255.738	11
	#%stop speckle%			34					426.447	290.2	11						283.057	229.279	5						448.137	387.576	36						327.02	364.377	30						338.125	255.875	12
	#%start speckle%								426.216	290.582	12						282.857	229.492	6						448.306	387.369	37						327.272	364.246	31						338.174	256.219	13
	347.5	123.214	1						426.007	290.82	13						282.678	229.67	7						448.381	387.412	38						327.476	364.083	32						337.932	256.591	14
	347.55	123.11	2						425.911	291.042	14						282.592	229.758	8						448.292	387.418	39						327.676	364.027	33						337.887	256.694	15
	347.854	123.372	3						425.848	291.373	15						282.415	229.91	9						448.429	387.241	40						327.913	363.944	34						337.712	256.81	16
	347.849	123.715	4						425.856	291.694	16						282.294	230.132	10						448.423	387.187	41						327.927	363.909	35						337.65	256.933	17
	347.657	123.539	5						425.529	291.905	17						282.233	230.174	11						448.603	387.13	42						328.023	363.733	36						337.652	257.07	18
	347.759	123.615	6						425.357	292.001	18						281.972	230.464	12						448.722	386.992	43						#%stop speckle%			36					337.496	257.127	19
	347.867	123.663	7						425.128	292.545	19						281.707	230.55	13						448.843	387.039	44														337.468	257.273	20
	347.837	123.743	8						425.059	292.583	20						281.637	230.831	14						448.887	386.861	45														337.312	257.457	21
	347.911	123.808	9						424.956	292.998	21						281.424	230.955	15						449.03	386.841	46														337.252	257.626	22
	348.074	123.919	10						424.653	293.15	22						281.345	231.102	16						#%stop speckle%			46													337.167	257.802	23
	#%stop speckle%			10					#%stop speckle%			22					281.18	231.2	17						#%start speckle%																337.12	257.885	24
	#%start speckle%								#%start speckle%								281.02	231.385	18						435.437	372.082	1														337.087	257.997	25
	218.163	331.588	1						154.347	228.798	1						280.734	231.564	19						435.222	371.918	2														336.987	258.194	26
	218.451	331.77	2						154.895	227.89	2						280.654	231.929	20						435.228	371.957	3														336.865	258.348	27
	218.508	331.804	3						154.786	228.024	3						280.54	232.247	21						435.367	372.045	4														336.822	258.537	28
	218.661	331.664	4						154.762	228.109	4						280.706	231.563	22						435.408	371.79	5														336.635	258.737	29
	218.57	331.346	5						154.737	228.331	5						280.25	232.268	23						435.485	371.787	6														336.517	258.917	30
	218.928	331.809	6						154.973	228.503	6						280	233	24						435.54	371.758	7														336.636	259.024	31
	218.925	331.715	7						#%stop speckle%			6					280.154	232.672	25						435.643	371.62	8														336.42	259.178	32
	219.096	331.637	8						#%start speckle%								279.5	233	26						435.805	371.438	9														336.308	259.253	33
	219.371	331.622	9						411.82	268.959	1						279.716	232.454	27						435.851	371.483	10														336.205	259.434	34
	219.25	331.76	10						411.633	269.239	2						279.544	232.772	28						435.921	371.379	11														336.154	259.602	35
	219.356	331.813	11						411.516	269.661	3						279.523	233.176	29						435.967	371.276	12														336.007	259.771	36
	219.644	331.756	12						411.367	269.848	4						279.5	234	30						436.038	371.417	13														335.797	260.096	37
	219.844	331.836	13						411.337	270.162	5						278.989	233.488	31						436.064	371.258	14														335.715	260.217	38
	220.158	331.876	14						411.164	270.227	6						279.066	233.477	32						#%stop speckle%			14													335.68	260.255	39
	220.03	331.892	15						411.213	270.611	7						278.572	234.08	33						#%start speckle%																335.571	260.484	40
	220.164	331.929	16						411	270.86	8						278.877	233.918	34						335.152	120.986	1														335.475	260.667	41
	220.323	332.05	17						410.802	271.104	9						278.385	234.786	35						334.607	119.109	2														335.417	260.757	42
	220.286	331.952	18						410.806	271.371	10						278.521	234.851	36						334.62	119.082	3														335.307	260.903	43
	220.326	332.023	19						410.735	271.649	11						277.991	234.945	37						#%stop speckle%			3													335.312	261.088	44
	220.677	331.954	20						410.563	271.874	12						277.738	235.069	38						#%start speckle%																335.137	261.22	45
	220.842	331.975	21						410.429	272.093	13						277.412	235.737	39						346.047	101.581	1														335.052	261.443	46
	221.025	331.957	22						410.375	272.324	14						277.443	235.451	40						346.316	101.45	2														334.953	261.572	47
	221.089	332.13	23						410.208	272.508	15						277.303	235.601	41						346.23	101.528	3														334.734	261.723	48
	221.45	332.074	24						410.132	272.624	16						277	235.5	42						346.139	101.641	4														334.741	261.924	49
	221.607	332.119	25						410.071	273.043	17						277.034	236.321	43						346.483	101.691	5														334.583	262.204	50
	221.628	332.456	26						410.052	273.192	18						277.184	236.057	44						346.606	101.945	6														334.552	262.293	51
	#%stop speckle%			26					409.87	273.458	19						277.142	236.268	45						346.395	101.802	7														334.431	262.43	52
	#%start speckle%								409.81	273.608	20						276.22	236.824	46						346.611	101.689	8														334.399	262.465	53
	235.925	300.35	1						409.599	273.888	21						276.473	236.404	47						346.894	101.652	9														334.272	262.705	54
	236.295	300.446	2						409.536	274.257	22						276.732	236.346	48						#%stop speckle%			9													334.232	262.893	55
	236.267	300.352	3						409.413	274.235	23						276.27	236.779	49																						334.075	263.057	56
	236.383	300.436	4						409.323	274.466	24						276.089	237.065	50																						333.99	263.217	57
	236.481	300.45	5						#%stop speckle%			24					276.266	237.08	51																						333.769	263.336	58
	236.6	300.502	6						#%start speckle%								276.235	236.933	52																						334.063	263.509	59
	236.656	300.539	7						332.256	243.284	1						275.503	237.542	53																						#%stop speckle%			59
	236.819	300.517	8						332.188	243.05	2						275.049	237.699	54																						#%start speckle%
	237.412	300.461	9						332.159	243.677	3						275.441	237.43	55																						193.321	220.599	1
	237.356	300.416	10						332.049	243.403	4						275.435	237.484	56																						193.34	221.37	2
	237.76	300.546	11						332.265	243.967	5						275.358	237.442	57																						#%stop speckle%			2
	237.815	300.536	12						332.367	244.095	6						274.773	238.239	58																						#%start speckle%
	237.979	300.586	13						331.856	244.588	7						274.643	238.292	59																						122.191	231.167	1
	238.15	300.589	14						331.765	244.541	8						#%stop speckle%			59																					122.094	231.656	2
	238.293	300.593	15						331.895	244.665	9						#%start speckle%																								122.04	231.793	3
	238.424	300.548	16						332.083	245.046	10						348.43	312.977	1																						122.11	232.158	4
	238.51	300.599	17						332.224	245.219	11						348.287	313.131	2																						122.196	232.339	5
	239.087	300.792	18						331.605	245.537	12						347.871	313.046	3																						122.135	232.54	6
	#%stop speckle%			18					332.155	245.477	13						347.568	313.374	4																						122.239	232.42	7
	#%start speckle%								331.976	246.071	14						347.56	313.743	5																						122.244	232.853	8
	274.735	221.67	1						332.081	246.262	15						346.982	313.027	6																						122.332	233.102	9
	274.643	221.792	2						331.933	246.431	16						347	313	7																						122.345	233.155	10
	274.433	221.809	3						331.985	246.768	17						346.5	314	8																						122.576	233.504	11
	274.528	221.836	4						331.865	246.756	18						346	314	9																						122.309	233.688	12
	274.656	222.242	5						331.923	247.228	19						346	314	10																						122.338	233.976	13
	274.628	222.378	6						332.165	247.357	20						346	314.5	11																						122.44	234.16	14
	274.834	222.423	7						331.847	247.408	21						346	314.5	12																						122.569	234.34	15
	274.862	222.156	8						331.658	247.903	22						346	314	13																						122.467	234.46	16
	275.298	222.47	9						331.606	247.573	23						345	314	14																						122.376	234.455	17
	275.361	222.502	10						331.861	248.366	24						345	314	15																						122.379	234.96	18
	275.416	222.539	11						331.642	248.804	25						344.5	314.5	16																						122.584	235.204	19
	275.666	222.54	12						331.402	248.47	26						344	314.5	17																						122.524	235.236	20
	276.117	223.119	13						331.891	249.016	27						344	314	18																						122.534	235.581	21
	275.687	222.772	14						331.506	249.109	28						344	315	19																						122.517	235.877	22
	276.443	223.08	15						331.313	249.054	29						344	314.5	20																						122.606	236.201	23
	275.932	223.415	16						331.275	249.142	30						344	314.5	21																						122.5	236.385	24
	276.002	223.486	17						331.124	249.251	31						343.5	315	22																						122.652	236.734	25
	276.598	222.961	18						331.531	249.547	32						343.5	314.5	23																						122.589	236.668	26
	276.952	223.118	19						#%stop speckle%			32					343.5	315	24																						122.703	237.074	27
	276.892	222.874	20						#%start speckle%								343	315.5	25																						122.599	237.152	28
	276.429	223.929	21						327.527	245.097	1						342.5	315	26																						122.755	237.431	29
	276.429	223.571	22						327.696	245.281	2						343	315	27																						122.806	237.893	30
	276.429	224.286	23						#%stop speckle%			2					342	315	28																						122.624	238.041	31
	276.786	224.643	24						#%start speckle%								342.5	315.5	29																						122.729	238.127	32
	277.5	223.929	25						175.986	225.551	1						342	315	30																						122.844	238.5	33
	277.857	224.643	26						176.036	225.714	2						341.5	316	31																						122.976	238.542	34
	#%stop speckle%			26					175.996	226.104	3						341.5	315.5	32																						#%stop speckle%			34
	#%start speckle%								176.041	226.188	4						341.5	316	33																						#%start speckle%
	278.28	220.51	1						176.364	226.487	5						341	315.5	34																						232.074	231.429	1
	278.75	220.312	2						176.144	226.714	6						341	316	35																						232.193	232.141	2
	278.738	220.86	3						176.386	226.728	7						341	316	36																						232.125	232.074	3
	278.827	220.707	4						176.537	227.093	8						340.5	316.5	37																						232.18	232.181	4
	278.836	220.745	5						176.458	226.946	9						340.5	316	38																						232.116	232.466	5
	278.857	220.93	6						176.42	227.378	10						340.5	316	39																						232.196	232.739	6
	279.052	221.116	7						176.659	227.636	11						339.5	316	40																						231.872	232.904	7
	279.137	221.042	8						176.598	227.625	12						339.5	316.5	41																						231.564	233.232	8
	279.284	221.722	9						176.642	227.778	13						339.5	317	42																						231.762	233.44	9
	279.688	221.25	10						176.778	228.015	14						339.5	317	43																						231.736	233.501	10
	279.892	221.342	11						#%stop speckle%			14					#%stop speckle%			43																					231.688	233.666	11
	280.083	221.674	12						#%start speckle%								#%start speckle%																								231.773	233.983	12
	280.191	221.717	13						400.8	264.402	1						356.292	335.441	1																						231.573	233.988	13
	280.456	222.106	14						400.441	264.059	2						356.266	335.771	2																						231.697	234.208	14
	280.369	221.924	15						400.391	264.237	3						356.304	335.659	3																						231.451	234.269	15
	280.598	222.024	16						400.529	264.592	4						356.101	335.741	4																						231.296	234.716	16
	280.669	222.27	17						400.241	264.692	5						356.024	336.009	5																						231.291	234.993	17
	280.698	221.989	18						400.165	265.3	6						356.441	336.524	6																						231.26	235.131	18
	281.172	222.081	19						400.299	265.583	7						#%stop speckle%			6																					231.215	235.272	19
	281.184	222.387	20						400.34	265.718	8						#%start speckle%																								231.226	235.42	20
	281.169	222.518	21						400.145	265.819	9						274.541	223.722	1																						231.252	235.594	21
	281.443	222.738	22						399.891	266.378	10						274.869	223.878	2																						#%stop speckle%			21
	281.526	222.746	23						400.266	266.296	11						274.477	223.83	3																						#%start speckle%
	281.593	222.842	24						400.011	266.424	12						274.28	224.073	4																						383.653	285.315	1
	281.843	223.001	25						399.982	266.819	13						274.019	224.227	5																						383.635	285.446	2
	282.046	223.072	26						399.739	266.876	14						273.831	224.235	6																						383.582	285.541	3
	281.922	223	27						399.935	267.07	15						273.75	224.336	7																						383.142	285.795	4
	282.224	223.168	28						400.477	268.345	16						273.564	224.691	8																						383.053	285.963	5
	282.301	223.383	29						400.763	268.174	17						273.49	224.769	9																						383.078	286.141	6
	282.338	223.362	30						399.79	268.262	18						273.357	225.063	10																						383.156	286.232	7
	282.639	223.435	31						399.831	268.347	19						273.111	225.162	11																						383.018	286.34	8
	282.517	223.616	32						399.481	268.446	20						272.943	225.331	12																						382.832	286.378	9
	282.88	223.651	33						399.309	268.631	21						272.88	225.489	13																						382.703	286.602	10
	282.74	223.644	34						399.254	269.184	22						272.692	225.647	14																						382.752	286.68	11
	283.068	223.733	35						399.211	269.254	23						272.567	225.62	15																						382.512	286.851	12
	283.307	223.896	36						399.269	269.539	24						272.355	226.022	16																						382.579	287.021	13
	283.482	224.131	37						399.128	269.878	25						272.254	225.978	17																						382.466	287.316	14
	283.683	224.017	38						398.809	270.048	26						271.937	227.161	18																						382.303	287.48	15
	283.811	224.354	39						398.719	270.382	27						272.093	226.532	19																						382.214	287.616	16
	283.695	224.427	40						398.582	270.284	28						271.795	226.526	20																						382.152	287.625	17
	284.014	224.371	41						398.552	270.73	29						271.792	226.845	21																						381.981	287.895	18
	284.019	224.548	42						398.661	270.836	30						271.481	227.014	22																						381.979	287.861	19
	284.159	224.52	43						398.346	271.173	31						271.347	227.146	23																						381.825	288.124	20
	284.264	224.711	44						398.654	271.239	32						271.253	227.265	24																						381.681	288.441	21
	284.292	224.731	45						398.361	271.579	33						271.056	227.605	25																						381.606	288.254	22
	284.398	224.769	46						398.051	271.537	34						270.909	227.593	26																						381.656	288.52	23
	284.819	224.696	47						398.13	271.941	35						270.739	227.766	27																						381.488	288.514	24
	284.832	224.896	48						398.148	272.212	36						270.501	227.876	28																						381.326	288.658	25
	#%stop speckle%			48					398.126	272.289	37						270.447	228.09	29																						381.351	288.797	26
	#%start speckle%								397.759	272.635	38						270.218	228.173	30																						381.14	288.999	27
	228.23	407.271	1						397.528	273.06	39						270.04	228.475	31																						380.987	289.011	28
	228.277	407.89	2						397.418	273.114	40						269.854	228.695	32																						380.928	289.242	29
	228.303	407.372	3						397.47	273.197	41						269.851	228.791	33																						380.718	289.524	30
	228.75	407.501	4						397.631	273.595	42						269.641	228.875	34																						380.665	289.649	31
	228.616	407.643	5						397.217	273.995	43						269.524	229.087	35																						380.656	289.708	32
	228.8	407.513	6						397.252	274.473	44						269.349	229.293	36																						380.579	289.885	33
	228.834	407.44	7						397.203	274.463	45						#%stop speckle%			36																					380.381	290.046	34
	228.937	407.496	8						396.935	274.797	46						#%start speckle%																								380.168	290.172	35
	229.093	407.439	9						397.128	275.356	47						350.467	326.456	1																						#%stop speckle%			35
	228.973	407.273	10						396.676	275.077	48						350.575	326.391	2
	229.188	407.615	11						396.988	275.463	49						350.216	326.463	3
	229.331	407.487	12						396.719	275.654	50						349.667	326.527	4
	229.577	407.591	13						396.399	275.761	51						349.451	326.805	5
	229.81	407.637	14						396.533	276.308	52						349.325	326.656	6
	229.678	407.42	15						396.722	276.441	53						349.106	327.008	7
	229.779	407.503	16						396.48	276.564	54						348.906	326.91	8
	229.883	407.543	17						396.384	277.099	55						348.65	327.041	9
	230.223	407.306	18						396.407	276.973	56						348.488	327.325	10
	230.748	407.216	19						395.923	277.412	57						348.975	327.034	11
	230.371	407.811	20						395.942	277.753	58						348.102	327.442	12
	230.444	407.711	21						396.271	278.138	59						347.67	327.435	13
	230.446	407.808	22						396.286	278.571	60						347.669	327.502	14
	230.488	407.786	23						#%stop speckle%			60					347.503	327.505	15
	230.651	407.796	24						#%start speckle%								#%stop speckle%			15
	231.049	407.742	25						368.13	274.248	1						#%start speckle%
	231.089	407.25	26						368.143	274.287	2						359.668	362.737	1
	231.187	407.028	27						368.059	274.503	3						359.169	362.868	2
	231.269	406.948	28						#%stop speckle%			3					359.331	363.511	3
	231.541	406.919	29						#%start speckle%								358.723	363.229	4
	231.822	407.032	30						376.904	254.438	1						358.765	363.259	5
	232.125	407.063	31						376.751	254.729	2						358.679	363.389	6
	232.18	407.037	32						377.074	254.951	3						358.269	363.897	7
	232.342	407.467	33						376.831	254.987	4						358.137	364.052	8
	232.564	407.432	34						#%stop speckle%			4					357.855	363.724	9
	#%stop speckle%			34					#%start speckle%								357.566	363.86	10
	#%start speckle%								375.462	254.083	1						357.217	363.941	11
	322.714	163.351	1						375.5	254	2						357.39	364.306	12
	323.017	163.428	2						375.5	254	3						356.78	364.145	13
	323.164	163.566	3						375.5	254	4						356.338	364.281	14
	323.149	163.79	4						375.5	254.5	5						356.386	364.37	15
	323.043	163.638	5						375	254.5	6						356.686	364.237	16
	#%stop speckle%			5					375.5	255	7						356.434	364.426	17
	#%start speckle%								375	255	8						356.019	364.835	18
	273.527	233.912	1						375	255.5	9						355.5	364.5	19
	273.373	234.137	2						#%stop speckle%			9					355.2	364.592	20
	273.843	234.248	3						#%start speckle%								354.789	364.691	21
	274.14	233.938	4						222.143	222.115	1						354.922	364.833	22
	274.283	234.294	5						222.363	221.779	2						#%stop speckle%			22
	274.328	234.164	6						222.37	222.155	3						#%start speckle%
	274.45	234.439	7						222.694	222.495	4						357.474	367.163	1
	274.775	234.638	8						#%stop speckle%			4					357.22	366.885	2
	274.786	234.843	9						#%start speckle%								357.148	366.645	3
	274.659	234.79	10						172.335	223.695	1						357.27	366.754	4
	274.945	234.892	11						172.312	223.613	2						#%stop speckle%			4
	274.823	234.639	12						172.108	223.702	3						#%start speckle%
	275.426	234.836	13						172.087	224.122	4						224	176	1
	275.713	235.349	14						172.367	224.297	5						224	175.5	2
	275.817	235.236	15						172.47	224.525	6						223.5	176.5	3
	276.208	235.596	16						172.669	224.941	7						223.5	176	4
	276.396	235.255	17						172.693	224.887	8						223.5	176.5	5
	276.081	235.381	18						172.508	225.475	9						223.5	177	6
	276.339	235.492	19						172.484	225.566	10						223.5	177.5	7
	276.472	235.465	20						172.888	225.563	11						223	177	8
	276.743	235.763	21						172.879	225.761	12						223	177.5	9
	276.611	235.847	22						172.972	226.009	13						223	177	10
	276.971	235.986	23						173.088	226.338	14						222.5	177.5	11
	277.086	236.162	24						173.094	226.801	15						223	177.5	12
	277.114	236.205	25						173.119	227.173	16						223	178.5	13
	277.113	236.159	26						173.092	227.372	17						222	178	14
	277.153	236.358	27						173.091	226.96	18						#%stop speckle%			14
	277.523	236.659	28						173.304	227.199	19
	#%stop speckle%			28					173.302	227.515	20
	#%start speckle%								173.158	228.091	21
	276.595	230.889	1						173.365	227.884	22
	276.507	230.928	2						173.276	227.727	23
	#%stop speckle%			2					173.389	228.173	24
	#%start speckle%								173.1	228.282	25
	221.97	344.905	1						#%stop speckle%			25
	222.515	344.663	2						#%start speckle%
	222.444	344.681	3						297.859	234.622	1
	222.857	344.719	4						297.905	234.688	2
	223.106	344.887	5						297.872	235.15	3
	223.212	345.048	6						297.933	235.433	4
	223.218	345.141	7						297.79	235.737	5
	223.133	344.965	8						297.727	235.585	6
	223.343	345.034	9						297.787	235.844	7
	223.554	344.936	10						297.691	236.09	8
	223.671	345.083	11						297.781	236.375	9
	224.039	345.093	12						297.777	236.499	10
	224.04	345.07	13						297.739	236.791	11
	224.151	345.036	14						297.627	236.999	12
	224.307	344.696	15						297.612	237.021	13
	224.37	344.742	16						297.722	237.403	14
	224.609	344.959	17						297.565	237.614	15
	224.669	344.968	18						297.784	238.059	16
	224.825	344.761	19						297.587	237.891	17
	225.096	344.95	20						297.703	238.235	18
	225.019	344.759	21						297.609	238.552	19
	225.253	344.956	22						297.556	238.553	20
	225.633	344.819	23						297.691	238.821	21
	225.641	344.743	24						297.552	239.174	22
	225.918	344.79	25						297.742	239.215	23
	225.838	344.84	26						297.639	239.609	24
	226.136	344.896	27						297.656	239.808	25
	226.216	345.023	28						297.565	239.896	26
	#%stop speckle%			28					297.487	239.961	27
	#%start speckle%								#%stop speckle%			27
	249.661	276.408	1
	249.639	276.419	2
	249.662	276.632	3
	250.081	276.79	4
	249.657	276.516	5
	249.995	276.437	6
	250.394	276.803	7
	250.505	276.265	8
	250.558	276.687	9
	250.503	276.523	10
	250.578	276.679	11
	250.975	276.562	12
	251.178	276.929	13
	251.105	276.706	14
	251.07	276.651	15
	251.31	276.836	16
	251.511	276.765	17
	251.681	276.755	18
	251.922	276.679	19
	251.814	276.656	20
	251.959	276.82	21
	252.215	276.95	22
	252.562	276.922	23
	252.923	277.008	24
	252.84	277.237	25
	253.109	277.053	26
	253.184	277.205	27
	253.466	277.211	28
	253.568	277.108	29
	253.635	277.155	30
	253.942	277.166	31
	254.144	277.473	32
	254.336	277.52	33
	254.387	277.422	34
	254.63	277.308	35
	254.822	277.405	36
	254.978	277.461	37
	255.104	277.44	38
	255.44	277.583	39
	255.673	277.451	40
	255.808	277.385	41
	255.969	277.449	42
	256.327	277.512	43
	256.667	277.528	44
	257.196	277.301	45
	256.779	277.697	46
	256.833	277.688	47
	257.201	277.675	48
	257.277	277.626	49
	257.308	277.685	50
	257.613	277.677	51
	257.751	277.885	52
	258.035	277.846	53
	258.142	278.028	54
	258.246	277.977	55
	258.46	278.162	56
	#%stop speckle%			56
