# Supplementary material for: A mechanism with severing near barbed ends and annealing explains structure and dynamics of dendritic actin networks
Source: eLife journal article supplement (doi:10.7554/elife.69031), 2022-06-06
Supplement: supp [file elife-69031-supp-v2.zip › elife_poa_e69031_Figure_6_source_data_2.xlsx]

## Sheet: Sheet1
	cell1 (before treatment)							cell1 (after treatment)								cell2 (before treatment)							cell2 (after treatment)								cell3 (before treatment)							cell3 (after treatment)
	location		frame number starting from fr. 2 to the last existing frame	Time after frame 1 (frame)	frequency of speckles which disappeared at the next frame	time (s)	number of remaining speckles at each timepoint	location		frame number starting from fr. 70 to the last existing frame	Time after frame 69 (frame)	frequency of speckles which disappeared at the next frame	time (s)	number of remaining speckles at each timepoint		location		frame number starting from fr. 2 to the last existing frame	Time after frame 1 (frame)	frequency of speckles which disappeared at the next frame	time (s)	number of remaining speckles at each timepoint	location		frame number starting from fr. 70 to the last existing frame	Time after frame 69 (frame)	frequency of speckles which disappeared at the next frame	time (s)	number of remaining speckles at each timepoint		location		frame number starting from fr. 2 to the last existing frame	Time after frame 1 (frame)	frequency of speckles which disappeared at the next frame	time (s)	number of remaining speckles at each timepoint	location		frame number starting from fr. 70 to the last existing frame	Time after frame 69 (frame)	frequency of speckles which disappeared at the next frame	time (s)	number of remaining speckles at each timepoint
	x	y						x	y							x	y						x	y							x	y						x	y
	#%start speckle%			1	6	0	84	#%start speckle%			1	6	0	62		#%start speckle%			1	3	0	60	#%start speckle%			1	1	0	54		#%start speckle%			1	2	0	45	#%start speckle%			1	3	0	43
	253.78	232.26	1	2	4	2	78	278.958	451.667	1	2	1	2	56		254	276.5	1	2	1	2	57	249.118	309.412	1	2	0	2	53		332.917	207.5	1	2	3	2	43	392.857	201.429	1	2	2	2	40
	253.654	232.866	2	3	4	4	74	278.958	451.458	2	3	3	4	55		254.5	277	2	3	2	4	56	250.294	309.706	2	3	1	4	53		330.833	207.917	2	3	5	4	40	392.857	201.786	2	3	3	4	38
	255.473	233.384	3	4	1	6	70	279.375	451.042	3	4	3	6	52		256.25	277.25	3	4	4	6	54	250.294	309.706	3	4	0	6	52		332.083	208.75	3	4	1	6	35	392.857	201.786	3	4	0	6	35
	255.136	233.715	4	5	2	8	69	279.583	451.042	4	5	1	8	49		256.75	277.75	4	5	1	8	50	250.294	310	4	5	2	8	52		332.5	207.917	4	5	0	8	34	391.786	201.786	4	5	0	8	35
	256.076	233.44	5	6	1	10	67	279.167	451.042	5	6	1	10	48		257.5	277.75	5	6	0	10	49	250.294	310.294	5	6	0	10	50		330.833	206.25	5	6	3	10	34	391.786	202.143	5	6	0	10	35
	256.302	233.601	6	7	4	12	66	279.167	451.042	6	7	0	12	47		258.75	277	6	7	0	12	49	251.765	310.588	6	7	0	12	50		331.667	206.25	6	7	2	12	31	391.786	202.143	6	7	0	12	35
	256.66	234.131	7	8	1	14	62	279.167	451.042	7	8	0	14	47		260.25	276.5	7	8	1	14	49	251.471	309.412	7	8	1	14	50		331.667	205	7	8	1	14	29	391.786	202.143	7	8	1	14	35
	#%stop speckle%			9	1	16	61	279.167	451.042	8	9	0	16	47		261.25	277.25	8	9	2	16	48	251.471	309.412	8	9	1	16	49		330.833	205.833	8	9	1	16	28	391.786	200.714	8	9	0	16	34
	#%start speckle%			10	1	18	60	279.167	451.042	9	10	0	18	47		262.25	277	9	10	1	18	46	251.471	309.412	9	10	1	18	48		330.833	204.167	9	10	1	18	27	390.357	201.429	9	10	1	18	34
	238.25	301.25	1	11	4	20	59	280	450.833	10	11	0	20	47		263.75	277.5	10	11	3	20	45	251.765	308.824	10	11	1	20	47		330.417	203.333	10	11	1	20	26	388.571	198.929	10	11	0	20	33
	238.698	301.861	2	12	1	22	55	280	450.833	11	12	1	22	47		263.75	276.25	11	12	0	22	42	251.765	308.824	11	12	1	22	46		#%stop speckle%			12	1	22	25	#%stop speckle%			12	0	22	33
	238.431	301.662	3	13	0	24	54	280	450.833	12	13	1	24	46		264.75	277	12	13	0	24	42	251.765	308.824	12	13	2	24	45		#%start speckle%			13	2	24	24	#%start speckle%			13	0	24	33
	239.544	302.074	4	14	3	26	54	280	450.625	13	14	1	26	45		266	277	13	14	0	26	42	251.765	308.824	13	14	0	26	43		231.176	331.471	1	14	2	26	22	273.571	280.357	1	14	1	26	33
	239.775	301.62	5	15	1	28	51	280	450.625	14	15	1	28	44		267	276.25	14	15	1	28	42	252.647	308.824	14	15	0	28	43		#%stop speckle%			15	1	28	20	273.571	279.643	2	15	0	28	32
	239.718	301.218	6	16	2	30	50	280	450.625	15	16	0	30	43		268	276.5	15	16	1	30	41	252.353	308.824	15	16	1	30	43		#%start speckle%			16	1	30	19	273.571	278.929	3	16	0	30	32
	240.097	301.534	7	17	1	32	48	280	450.625	16	17	1	32	43		268.75	277	16	17	1	32	40	252.941	308.235	16	17	0	32	42		320	160.833	1	17	2	32	18	272.857	279.286	4	17	0	32	32
	240.679	301.714	8	18	1	34	47	279.375	449.375	17	18	0	34	42		268.75	276.25	17	18	0	34	39	252.941	308.235	17	18	0	34	42		317.917	160.417	2	18	0	34	16	272.857	279.286	5	18	1	34	32
	240.695	302.254	9	19	0	36	46	#%stop speckle%			19	1	36	42		269.5	276.25	18	19	1	36	39	252.941	306.765	18	19	1	36	42		320.417	161.25	3	19	0	36	16	272.857	278.214	6	19	3	36	31
	240.75	301.75	10	20	0	38	46	#%start speckle%			20	1	38	41		269.5	276.25	19	20	0	38	38	252.941	306.765	19	20	1	38	41		320.417	161.25	4	20	1	38	16	272.857	278.214	7	20	0	38	28
	241.5	302	11	21	2	40	46	293.056	165.556	1	21	0	40	40		270.5	277.25	20	21	1	40	38	252.941	306.765	20	21	0	40	40		320	161.25	5	21	1	40	15	273.214	277.857	8	21	1	40	28
	#%stop speckle%			22	1	42	44	293.333	165.556	2	22	0	42	40		271	277.5	21	22	3	42	37	252.941	306.765	21	22	2	42	40		318.333	160.833	6	22	1	42	14	273.214	277.5	9	22	1	42	27
	#%start speckle%			23	1	44	43	293.333	165.556	3	23	1	44	40		272.25	278.25	22	23	1	44	34	252.941	306.765	22	23	0	44	38		318.333	159.167	7	23	0	44	13	272.5	276.429	10	23	0	44	26
	261.913	254.595	1	24	0	46	42	294.444	164.444	4	24	0	46	39		#%stop speckle%			24	2	46	33	252.941	306.765	23	24	1	46	38		317.917	161.25	8	24	0	46	13	272.5	276.429	11	24	0	46	26
	262.633	253.437	2	25	0	48	42	294.444	164.444	5	25	0	48	39		#%start speckle%			25	2	48	31	252.941	306.765	24	25	0	48	37		317.5	160.417	9	25	1	48	13	271.786	276.071	12	25	0	48	26
	262.552	253.838	3	26	1	50	42	294.722	166.111	6	26	0	50	39		243.214	162.5	1	26	0	50	29	252.941	306.765	25	26	1	50	37		317.917	158.75	10	26	0	50	12	271.786	276.071	13	26	0	50	26
	262.638	254.089	4	27	1	52	41	294.722	166.111	7	27	0	52	39		245.357	163.571	2	27	1	52	29	252.941	307.059	26	27	0	52	36		316.667	157.917	11	27	0	52	12	271.429	274.643	14	27	1	52	26
	262.914	254.089	5	28	0	54	40	295.278	166.944	8	28	1	54	39		245.357	161.786	3	28	1	54	28	252.941	307.059	27	28	0	54	36		315.833	157.917	12	28	0	54	12	270.357	274.286	15	28	0	54	25
	263.525	254.093	6	29	1	56	40	295.278	166.944	9	29	1	56	38		247.143	163.929	4	29	0	56	27	252.941	307.059	28	29	0	56	36		317.083	157.5	13	29	0	56	12	271.071	274.286	16	29	0	56	25
	263.82	253.905	7	30	1	58	39	295.278	166.944	10	30	2	58	37		247.857	165	5	30	4	58	27	252.941	307.353	29	30	0	58	36		#%stop speckle%			30	1	58	12	271.429	273.929	17	30	0	58	25
	264.777	255.077	8	31	0	60	38	295.278	166.944	11	31	3	60	35		249.643	163.929	6	31	3	60	23	252.941	307.353	30	31	2	60	36		#%start speckle%			31	0	60	11	269.643	273.571	18	31	0	60	25
	265.295	254.754	9	32	1	62	38	295.278	166.944	12	32	0	62	32		250.714	165.357	7	32	0	62	20	252.941	307.353	31	32	1	62	34		317.941	215.588	1	32	1	62	11	270.714	273.214	19	32	0	62	25
	265.375	254.741	10	33	0	64	37	295.833	166.944	13	33	0	64	32		250.714	165	8	33	1	64	20	252.941	307.647	32	33	1	64	33		315.294	215.882	2	33	0	64	10	271.429	273.214	20	33	1	64	25
	265.478	254.849	11	34	1	66	37	295.833	166.944	14	34	0	66	32		251.786	165.714	9	34	3	66	19	252.647	307.647	33	34	0	66	32		315.588	215	3	34	0	66	10	270.714	272.5	21	34	1	66	24
	265.608	254.686	12	35	1	68	36	296.389	167.222	15	35	0	68	32		252.857	164.643	10	35	1	68	16	252.647	307.647	34	35	0	68	32		#%stop speckle%			35	1	68	10	270.357	271.786	22	35	0	68	23
	265.741	254.772	13	36	1	70	35	296.389	167.222	16	36	0	70	32		253.929	164.643	11	36	1	70	15	252.647	307.647	35	36	2	70	32		#%start speckle%			36	0	70	9	270.357	271.786	23	36	0	70	23
	266.949	255.259	14	37	0	72	34	296.389	167.222	17	37	0	72	32		256.429	166.429	12	37	0	72	14	252.647	307.647	36	37	1	72	30		117.353	248.824	1	37	0	72	9	270.714	272.143	24	37	0	72	23
	268.068	255.101	15	38	2	74	34	296.944	167.5	18	38	0	74	32		255.714	166.429	13	38	0	74	14	252.647	307.647	37	38	1	74	29		117.353	249.118	2	38	0	74	9	270.714	272.143	25	38	0	74	23
	267.677	256.005	16	39	2	76	32	296.944	167.5	19	39	0	76	32		257.143	165.714	14	39	0	76	14	252.647	307.647	38	39	1	76	28		115.882	248.824	3	39	1	76	9	270.714	272.143	26	39	0	76	23
	267.872	255.409	17	40	1	78	30	296.944	167.5	20	40	0	78	32		258.571	166.071	15	40	0	78	14	252.353	307.941	39	40	2	78	27		#%stop speckle%			40	0	78	8	271.071	272.143	27	40	0	78	23
	268.25	255.75	18	41	0	80	29	296.944	167.5	21	41	1	80	32		258.929	166.071	16	41	1	80	14	252.353	307.941	40	41	1	80	25		#%start speckle%			41	0	80	8	271.071	272.143	28	41	1	80	23
	268.5	256.25	19	42	0	82	29	296.944	167.5	22	42	0	82	31		260	166.786	17	42	0	82	13	252.353	307.941	41	42	0	82	24		332.059	353.824	1	42	0	82	8	271.429	272.143	29	42	0	82	22
	269	256.25	20	43	2	84	29	296.944	167.5	23	43	0	84	31		262.143	167.857	18	43	0	84	13	252.647	307.647	42	43	0	84	24		331.765	352.941	2	43	0	84	8	270.357	270.357	30	43	0	84	22
	269.039	256.492	21	44	0	86	27	296.944	167.5	24	44	0	86	31		262.5	167.143	19	44	0	86	13	252.941	306.765	43	44	0	86	24		330.294	351.176	3	44	0	86	8	269.286	268.929	31	44	0	86	22
	269.619	256.37	22	45	1	88	27	297.778	168.333	25	45	0	88	31		263.571	167.857	20	45	0	88	13	252.353	307.647	44	45	4	88	24		328.529	349.412	4	45	0	88	8	269.286	268.929	32	45	0	88	22
	270.147	256.162	23	46	0	90	26	297.778	168.333	26	46	0	90	31		263.929	167.5	21	46	0	90	13	253.235	307.353	45	46	1	90	20		330	348.824	5	46	0	90	8	269.643	268.571	33	46	1	90	22
	270.168	255.854	24	47	0	92	26	297.778	168.333	27	47	0	92	31		266.071	167.5	22	47	2	92	13	253.824	306.765	46	47	0	92	19		328.529	348.235	6	47	0	92	8	269.286	268.214	34	47	1	92	21
	270.435	255.923	25	48	0	94	26	297.778	168.333	28	48	0	94	31		266.429	168.929	23	48	0	94	11	253.235	307.353	47	48	2	94	19		328.235	346.765	7	48	0	94	8	270	268.929	35	48	0	94	20
	270.567	255.97	26	49	1	96	26	298.611	168.333	29	49	2	96	31		268.571	168.214	24	49	1	96	11	253.235	306.765	48	49	0	96	17		327.647	345.588	8	49	0	96	8	270	268.929	36	49	0	96	20
	270.988	256.068	27	50>	25	98	25	298.611	168.333	30	50>	29	98	29		269.643	168.929	25	50>	10	98	10	252.647	306.471	49	50>	17	98	17		#%stop speckle%			50>	8	98	8	270	268.929	37	50>	20	98	20
	270.896	256.168	28					298.611	168.333	31						270.714	169.286	26					251.471	306.765	50						#%start speckle%							270	268.929	38
	271.171	256.353	29					299.722	169.167	32						271.786	169.643	27					252.647	306.765	51						311.667	193.75	1					270	268.214	39
	271.504	256.381	30					299.722	169.167	33						272.857	168.214	28					252.941	305.882	52						312.083	192.917	2					268.929	268.929	40
	271.753	256.746	31					299.722	169.167	34						274.286	169.286	29					252.941	305.882	53						313.333	192.917	3					269.643	267.5	41
	272.165	256.801	32					299.722	169.167	35						275	171.071	30					252.941	306.176	54						310.833	194.167	4					268.571	267.143	42
	272.441	256.799	33					299.722	169.167	36						275.357	169.643	31					#%stop speckle%								311.667	192.5	5					268.571	267.143	43
	272.791	256.369	34					299.722	169.167	37						275.357	169.286	32					#%start speckle%								310.833	191.667	6					268.571	267.143	44
	273.24	256.755	35					299.722	169.167	38						278.929	169.643	33					258	286.667	1						310.417	190.833	7					267.857	266.071	45
	273.766	257.231	36					299.722	169.167	39						277.857	168.929	34					259	286.667	2						#%stop speckle%							266.786	266.429	46
	274.064	257.185	37					300	169.444	40						#%stop speckle%							259.333	286	3						#%start speckle%							266.786	266.071	47
	274.426	257.227	38					300	169.444	41						#%start speckle%							259.333	286	4						356.765	314.412	1					266.786	266.071	48
	274.423	257.724	39					300.278	170.556	42						311.786	56.0714	1					259.667	285.667	5						356.471	315	2					267.857	263.214	49
	275.283	257.869	40					300.278	170.556	43						311.429	56.7857	2					261	285.333	6						355	314.706	3					267.857	264.643	50
	275.332	258.158	41					301.111	170.556	44						312.5	56.7857	3					261.333	285	7						354.118	313.529	4					267.857	264.286	51
	275.357	258.14	42					301.111	170.556	45						313.214	57.8571	4					262.333	285.333	8						353.235	312.353	5					267.5	263.571	52
	275.843	258.161	43					301.111	170.556	46						313.929	57.5	5					261.667	284.333	9						352.059	310.294	6					267.5	262.5	53
	275.918	258.147	44					301.944	170.833	47						313.214	58.9286	6					262.333	284.333	10						351.471	309.706	7					267.857	262.857	54
	276.005	258.245	45					301.944	170.833	48						314.643	58.2143	7					262.333	284	11						351.176	307.647	8					#%stop speckle%
	276.515	259.155	46					301.944	170.833	49						315	58.9286	8					262.667	283	12						350	307.647	9					#%start speckle%
	276.654	258.978	47					301.944	170.833	50						316.071	59.2857	9					262.667	283	13						350	306.471	10					203.856	280.211	1
	276.981	258.903	48					301.944	170.833	51						#%stop speckle%							262.667	282.667	14						347.941	306.471	11					204.667	279.667	2
	277.106	258.917	49					301.944	170.833	52						#%start speckle%							262.667	282.333	15						350	306.471	12					205.333	279.333	3
	277.274	258.84	50					301.944	170.833	53						248.25	362.5	1					262.667	281.333	16						347.941	303.529	13					203.667	278	4
	277.349	258.961	51					301.944	170.833	54						249	362.25	2					263	281.667	17						347.353	302.353	14					204.333	278.333	5
	277.74	259.252	52					301.944	171.389	55						248.75	361.5	3					263	281.667	18						347.059	301.471	15					204.667	278.667	6
	277.748	259.252	53					301.944	171.389	56						250.5	361.5	4					263.667	280.333	19						346.176	300	16					204.333	278	7
	277.772	259.88	54					301.944	171.389	57						251	361.5	5					263	279.667	20						346.176	300	17					205.667	277.667	8
	#%stop speckle%							301.944	171.389	58						251.75	361	6					263.667	280	21						346.765	299.706	18					204.667	278	9
	#%start speckle%							301.944	171.389	59						252.5	360.5	7					263.333	278.667	22						345.588	300	19					205	277.667	10
	276.25	306.5	1					301.944	171.389	60						253	361.5	8					264	278.667	23						345.294	298.824	20					204.667	277.667	11
	276	306.25	2					301.944	171.389	61						254.75	359.25	9					264	278.667	24						345.294	298.824	21					204.667	277.667	12
	276.5	306.75	3					301.944	171.389	62						255.75	359.75	10					264	278	25						344.706	298.235	22					204.333	277	13
	276.5	306.75	4					301.944	171.389	63						256.25	359	11					263.333	277	26						344.412	297.647	23					204.333	276	14
	276.75	306.75	5					300.833	171.667	64						256.75	358.25	12					263.333	276.667	27						343.235	295.588	24					204.333	275.667	15
	277	307	6					300.278	170.833	65						257	358	13					263.333	275.667	28						343.235	296.176	25					203.667	275	16
	277	307	7					299.722	171.389	66						258	358	14					264	276	29						343.235	294.118	26					204.667	275.333	17
	276.5	307.25	8					299.444	172.222	67						258.75	358.5	15					264	276.333	30						342.059	293.529	27					202.333	274	18
	278	307.25	9					298.889	172.778	68						258.75	358	16					264.333	275.333	31						342.059	292.353	28					204.667	274.667	19
	278	307.25	10					299.167	172.5	69						261.5	356.75	17					264	275	32						340	294.118	29					204.333	275.667	20
	278.5	307.75	11					#%stop speckle%								262.25	356.75	18					265	275	33						340.294	292.059	30					205	275.667	21
	278.5	307.75	12					#%start speckle%								262	356.5	19					265.333	276	34						340.294	292.059	31					203.667	276	22
	#%stop speckle%							236.875	306.25	1						263	356	20					264.667	274.667	35						340.294	292.059	32					204.667	274.667	23
	#%start speckle%							236.875	305.833	2						263.5	355.75	21					265.667	273	36						339.118	290.882	33					203.667	275.333	24
	258.183	331.559	1					237.708	306.875	3						264.75	355.5	22					264.667	272	37						339.118	290.882	34					204.333	275.333	25
	258.009	331.625	2					237.708	306.875	4						265.5	354.75	23					263	270	38						339.412	289.706	35					203	274.667	26
	258.243	331.675	3					238.542	306.875	5						265.75	354	24					264.667	271	39						338.235	289.706	36					204.667	275.333	27
	259.02	331.844	4					238.333	305.625	6						266.75	354	25					264	269.333	40						338.235	289.118	37					204.667	275	28
	259.77	331.885	5					238.542	306.875	7						267.5	354.25	26					264	268.667	41						337.647	288.824	38					204.333	275	29
	259.959	331.92	6					238.542	306.875	8						267.5	354.25	27					263.667	268	42						337.353	288.824	39					203	274.333	30
	260.131	331.741	7					238.542	306.875	9						267.75	352.5	28					263.667	267.333	43						337.059	287.647	40					202.667	274.667	31
	259.968	331.998	8					238.958	307.083	10						270	352.25	29					263.333	266	44						336.471	286.471	41					203.667	272.667	32
	260.053	331.949	9					238.958	307.083	11						269.75	351.75	30					263	265.667	45						335.882	286.176	42					202.333	273.333	33
	260.497	332.017	10					240.208	307.083	12						270.5	351.75	31					#%stop speckle%								336.176	285.882	43					202.667	274	34
	260.584	332.117	11					240.208	307.083	13						270.5	351.25	32					#%start speckle%								336.176	285.588	44					203	273	35
	260.813	332.314	12					240	307.5	14						271.75	351	33					252.353	98.2353	1						335.588	285	45					203	272	36
	261.159	332.452	13					#%stop speckle%								273	350.75	34					252.941	99.1176	2						335	283.824	46					204	272.333	37
	261.302	332.468	14					#%start speckle%								273.25	350	35					254.412	99.4118	3						335	283.824	47					201.333	271.333	38
	261.948	332.771	15					243.158	186.842	1						273.75	349.75	36					253.235	99.1176	4						335	283.824	48					202	271.667	39
	262.284	332.754	16					242.368	186.842	2						275	349.5	37					253.824	99.1176	5						334.706	283.235	49					202.333	272.333	40
	263.003	332.379	17					243.421	187.632	3						274.75	349.25	38					254.706	99.4118	6						334.118	282.941	50					202	271	41
	263.287	333.107	18					243.421	187.368	4						275.25	349.25	39					254.706	99.7059	7						333.529	282.353	51					202.333	271.333	42
	263.83	333.222	19					243.421	187.368	5						276.25	347.25	40					255	98.8235	8						333.235	281.765	52					202.667	269.667	43
	264.482	332.624	20					243.421	187.368	6						275.75	347.75	41					255.882	99.1176	9						332.647	281.471	53					201.333	272.667	44
	264.857	332.755	21					243.421	187.368	7						276	347.25	42					257.353	99.7059	10						332.647	281.176	54					202.667	272.333	45
	264.864	332.823	22					243.947	188.421	8						277	347	43					257.647	100	11						#%stop speckle%							201	273.333	46
	265.005	333.263	23					244.737	188.684	9						277.25	347.5	44					257.059	99.1176	12						#%start speckle%							201.333	273	47
	264.873	333.05	24					245.263	189.211	10						278	346.75	45					260.294	102.059	13						386.765	176.176	1					201.333	273	48
	265.331	333.256	25					245.263	188.421	11						278.75	346.25	46					259.118	101.765	14						385	175.294	2					201	272.667	49
	265.106	333.297	26					245.526	188.158	12						279	346.25	47					260	101.471	15						385	175	3					201	271.667	50
	265.794	332.935	27					245.526	188.421	13						281	345.75	48					261.765	102.941	16						383.824	174.412	4					200.667	271	51
	265.629	333.688	28					245.789	189.211	14						281	345	49					261.176	102.941	17						383.529	174.118	5					201.333	271.333	52
	265.92	333.706	29					246.842	190	15						281.75	345.25	50					262.059	102.647	18						383.824	173.235	6					201.333	271.333	53
	267.339	334.001	30					246.842	189.737	16						281.75	345.25	51					261.471	101.176	19						382.647	172.647	7					201.333	270.667	54
	267.677	333.679	31					247.105	189.474	17						282.25	345.5	52					260.882	101.765	20						382.059	172.941	8					#%stop speckle%
	268.123	333.906	32					247.105	189.474	18						#%stop speckle%							261.765	102.353	21						381.176	171.471	9					#%start speckle%
	268.785	333.857	33					247.368	190.263	19						#%start speckle%							261.765	101.471	22						381.176	171.471	10					170	206.333	1
	268.653	334.339	34					248.158	190	20						255	99.75	1					262.059	101.765	23						381.176	170.588	11					170.667	206.333	2
	268.929	333.543	35					248.158	189.737	21						254.75	100.75	2					263.529	101.765	24						380.882	170.588	12					170.667	206.333	3
	269.211	333.933	36					248.158	189.737	22						255.75	102	3					263.529	102.059	25						380.294	170.294	13					170.667	206.333	4
	269.316	333.907	37					248.421	190	23						256.25	101.75	4					264.706	102.059	26						380.294	170.294	14					170.333	206.667	5
	270.022	333.927	38					248.421	191.053	24						257	102.5	5					265.294	102.353	27						380.294	170.294	15					170.667	207	6
	270.962	333.818	39					248.684	190.263	25						257	103	6					266.176	102.647	28						379.118	170.294	16					170.333	207.333	7
	270.626	333.965	40					248.684	190.789	26						258.75	103.75	7					265.588	102.941	29						378.824	170.294	17					171.333	208	8
	270.785	333.975	41					249.474	191.579	27						260.25	104.5	8					266.471	102.647	30						#%stop speckle%							170.667	206.667	9
	270.584	334.179	42					249.737	191.579	28						262	105.5	9					267.059	103.235	31						#%start speckle%							170.333	206.333	10
	271.385	333.669	43					249.737	191.579	29						263.5	105.75	10					267.353	104.118	32						336.25	150	1					171	206.333	11
	271.582	333.204	44					250	192.105	30						263	106	11					268.824	103.529	33						335.833	147.917	2					171	206	12
	272.003	333.83	45					250	191.842	31						264.25	106.25	12					267.941	103.235	34						#%stop speckle%							171.667	206.333	13
	272.646	334.098	46					250.526	192.368	32						265.25	107.5	13					269.706	102.647	35						#%start speckle%							170.667	205.333	14
	272.388	334.122	47					250.526	192.368	33						266.75	108.25	14					270.882	102.941	36						310.588	240.294	1					171	204	15
	272.592	333.665	48					250.526	192.368	34						267.5	108.25	15					270.882	102.941	37						311.471	240.294	2					169.667	204.333	16
	272.457	333.769	49					250.789	192.368	35						267.5	108.25	16					271.765	103.529	38						310.294	238.824	3					171	204	17
	272.249	334.259	50					251.053	193.158	36						269.5	110	17					272.647	103.824	39						310.588	238.824	4					171	204	18
	#%stop speckle%							251.053	193.158	37						270.5	110.75	18					272.941	102.353	40						309.706	237.941	5					#%stop speckle%
	#%start speckle%							251.316	193.158	38						271	110.75	19					275	102.353	41						309.706	237.647	6					#%start speckle%
	248.5	424.25	1					251.316	193.158	39						272.25	111.25	20					274.706	102.647	42						309.118	236.765	7					414.545	206.364	1
	248.25	424	2					251.316	193.158	40						273.5	112.25	21					275.588	102.353	43						308.235	235	8					414.091	204.091	2
	249.5	424.25	3					252.105	193.421	41						273.5	111.5	22					275.588	100.588	44						307.941	235.294	9					413.182	204.545	3
	250	423.5	4					252.368	194.211	42						274.75	112.75	23					275.882	101.176	45						307.353	235.588	10					413.182	204.545	4
	250.5	423.75	5					252.368	193.947	43						275.25	112.75	24					276.471	100.882	46						307.059	234.412	11					413.182	205	5
	#%stop speckle%							252.368	193.947	44						275.75	113	25					277.059	100.294	47						305.882	234.118	12					413.182	205	6
	#%start speckle%							252.632	193.947	45						277	114.25	26					276.765	101.176	48						305	234.118	13					412.727	205	7
	273.014	463.758	1					253.158	194.211	46						277.5	113.75	27					277.353	101.765	49						305.882	233.824	14					413.636	205.455	8
	274.011	463.063	2					253.158	194.211	47						278.5	115	28					277.059	102.353	50						#%stop speckle%							412.273	205.455	9
	274.248	463.231	3					253.158	194.211	48						280.5	114.5	29					277.353	102.353	51						#%start speckle%							412.273	205.455	10
	274.502	463.064	4					253.158	194.211	49						280.75	114.5	30					278.529	101.765	52						136.471	273.824	1					411.818	205.455	11
	274.698	462.621	5					253.947	194.474	50						280.75	115	31					278.235	100.882	53						136.176	272.941	2					408.636	205	12
	275.202	462.952	6					253.947	194.474	51						281.75	115.25	32					278.235	100.882	54						135.588	272.647	3					410.909	205	13
	275.25	462.267	7					254.474	195.263	52						283.25	116	33					#%stop speckle%								135.588	271.765	4					409.545	203.636	14
	275.299	462.697	8					254.474	195.263	53						283.5	116	34					#%start speckle%								135.882	270.294	5					409.545	203.636	15
	275.67	461.82	9					254.474	195.263	54						284.5	115.75	35					208.235	133.824	1						136.176	270.882	6					409.091	204.091	16
	276.246	462.298	10					255	195.526	55						285.25	116.5	36					208.824	133.235	2						136.471	270.882	7					408.182	203.636	17
	276.09	462.31	11					255	195.526	56						285.5	116.5	37					210.294	134.118	3						136.765	269.412	8					408.636	201.818	18
	275.68	462.39	12					255	195.526	57						286.25	117.5	38					209.706	134.118	4						136.765	269.118	9					406.818	201.818	19
	277	461.727	13					255	195.526	58						287.5	118	39					211.176	134.118	5						137.647	269.118	10					407.727	202.273	20
	276.654	461.041	14					255.526	196.053	59						287.75	118	40					212.059	134.706	6						137.647	268.824	11					406.818	202.273	21
	277.295	461.008	15					255.526	196.053	60						288.75	118.25	41					212.647	134.706	7						138.529	268.529	12					406.818	202.273	22
	278.108	461.405	16					255.789	196.053	61						289.75	118.5	42					212.941	134.412	8						138.529	268.529	13					406.364	202.273	23
	278.216	460.646	17					256.053	196.053	62						289.75	119.25	43					212.941	134.412	9						138.529	267.647	14					405	200.455	24
	278.335	460.614	18					256.053	196.053	63						290.5	119.75	44					214.412	134.706	10						137.941	265.588	15					405.455	200.455	25
	278.806	460.419	19					255.789	196.053	64						291.75	119.5	45					214.706	134.706	11						137.059	264.412	16					405	200.455	26
	279.214	460.041	20					255.526	195.789	65						293	119.75	46					215.882	134.118	12						137.941	264.118	17					404.091	200.455	27
	279.485	459.849	21					255.263	195.789	66						293	120	47					217.647	134.706	13						137.941	264.118	18					403.636	199.545	28
	279.832	459.396	22					255.263	195.789	67						293	120	48					218.824	135	14						137.941	264.118	19					403.636	199.545	29
	#%stop speckle%							255.263	195.789	68						293.25	120.25	49					219.118	134.706	15						137.941	264.118	20					404.545	201.364	30
	#%start speckle%							255.263	195.789	69						293.75	120.25	50					219.412	135.294	16						137.353	263.235	21					403.636	199.545	31
	301.5	234	1					255	195.789	70						295	121.25	51					219.118	135.588	17						137.059	262.353	22					402.273	200.455	32
	302.25	234	2					255	196.053	71						295.5	121.75	52					220.294	135.588	18						137.059	261.765	23					402.727	199.545	33
	301.75	234	3					#%stop speckle%								295.75	122	53					221.176	135.882	19						136.765	261.176	24					401.364	199.091	34
	#%stop speckle%							#%start speckle%								295.75	122.25	54					221.765	136.765	20						136.471	259.412	25					401.364	200.909	35
	#%start speckle%							243.889	349.722	1						#%stop speckle%							222.059	137.059	21						136.765	258.824	26					401.364	200	36
	243.94	304.149	1					243.889	349.722	2						#%start speckle%							222.059	137.059	22						136.471	258.824	27					400.909	199.091	37
	244.573	304.48	2					243.889	350.278	3						302.5	86	1					223.235	137.059	23						135.588	256.471	28					402.273	199.545	38
	244.728	304.385	3					244.167	350.556	4						303	85.75	2					223.235	137.353	24						135.588	255.588	29					402.727	199.091	39
	244.706	304.48	4					244.167	350.556	5						305	87	3					223.235	137.353	25						135.294	255.588	30					402.273	199.545	40
	244.768	304.516	5					244.167	350.556	6						306.25	87.25	4					224.118	136.471	26						136.471	255.588	31					402.273	199.545	41
	245.656	304.421	6					244.444	350.833	7						307.25	87.5	5					224.706	136.765	27						136.765	255.588	32					401.818	200.455	42
	245.603	304.506	7					244.444	350.833	8						308	88.25	6					225.294	137.647	28						137.353	254.412	33					401.364	200	43
	246.802	304.72	8					244.722	351.111	9						308.25	88.5	7					225.882	137.647	29						137.059	254.412	34					402.273	200	44
	246.667	304.234	9					245.278	351.667	10						310.25	89.75	8					226.765	137.647	30						138.529	253.235	35					400.909	200.455	45
	246.614	304.481	10					245.278	351.667	11						310.75	89.75	9					226.471	138.235	31						137.941	253.529	36					401.364	200	46
	247.167	304.701	11					245.278	351.667	12						311.25	89.5	10					227.353	138.529	32						138.235	252.353	37					#%stop speckle%
	#%stop speckle%							245.278	351.667	13						312.75	90.5	11					228.235	137.941	33						137.941	252.647	38					#%start speckle%
	#%start speckle%							245.556	351.667	14						313	90.75	12					229.118	138.824	34						137.647	252.353	39					128	282.333	1
	244.133	193.873	1					245.556	352.222	15						314.5	91.75	13					229.118	137.647	35						138.235	252.059	40					127	281.333	2
	245.21	193.777	2					245.833	351.944	16						315.5	92.75	14					229.412	138.235	36						138.529	251.471	41					125.667	281.667	3
	244.973	193.95	3					246.389	352.5	17						316.75	93.25	15					230.588	138.235	37						138.529	251.176	42					126	281.333	4
	245.852	195.005	4					246.667	352.5	18						317.25	93.25	16					230.588	138.235	38						138.529	251.176	43					125.667	281.667	5
	245.85	194.787	5					246.667	352.5	19						318	94	17					230	137.941	39						138.529	250.588	44					124.667	282.667	6
	246.156	195.529	6					246.667	352.5	20						319.75	94.25	18					231.176	138.235	40						139.412	248.824	45					125	281	7
	246.387	195.32	7					246.667	352.5	21						320.25	94.25	19					231.176	138.235	41						139.118	248.824	46					125	280.333	8
	247.097	195.992	8					246.667	352.5	22						320.25	95.5	20					232.353	138.824	42						137.941	247.647	47					124	277.667	9
	247.711	196.36	9					246.667	353.056	23						321.5	94.25	21					233.235	138.824	43						138.529	246.765	48					125.667	279	10
	247.754	196.197	10					246.667	353.056	24						#%stop speckle%							234.706	139.412	44						138.529	246.765	49					124.333	278	11
	248.599	196.588	11					246.111	352.222	25						#%start speckle%							234.412	139.118	45						138.824	246.471	50					124.333	278	12
	248.935	196.823	12					247.222	351.389	26						238.75	207.75	1					234.412	139.118	46						138.824	246.471	51					124	278.333	13
	249.409	196.82	13					248.333	351.667	27						240.5	207.5	2					234.412	139.118	47						139.118	245.588	52					123.667	277	14
	249.552	196.931	14					247.5	351.667	28						239.75	207	3					235.294	139.412	48						139.706	245	53					123	276.667	15
	249.987	197.048	15					247.5	351.667	29						241.75	207.25	4					236.176	139.706	49						139.706	243.235	54					123.667	277.333	16
	251.093	197.294	16					247.5	352.222	30						243.25	208	5					236.471	139.706	50						#%stop speckle%							124	277.667	17
	251.407	197.636	17					247.5	352.222	31						244	208.75	6					236.471	139.706	51						#%start speckle%							123.333	276.333	18
	251.482	197.756	18					247.5	352.222	32						246	209.75	7					237.353	140	52						211.176	281.176	1					124.667	275.333	19
	251.796	197.845	19					247.5	352.222	33						245.75	209.75	8					237.647	140	53						210.588	281.471	2					#%stop speckle%
	251.959	197.685	20					247.5	352.222	34						247	209.75	9					238.529	140.588	54						211.471	280.294	3					#%start speckle%
	252.602	198.453	21					247.5	352.222	35						247.25	210	10					#%stop speckle%								211.471	279.412	4					283.667	341.333	1
	253.242	198.289	22					247.5	352.222	36						248.75	210.5	11					#%start speckle%								211.765	278.529	5					283	339	2
	253.764	199.252	23					247.5	352.222	37						250.5	210	12					264.485	170.109	1						210.588	277.059	6					283	339	3
	254.112	198.998	24					247.5	352.222	38						251	210.25	13					264.333	169.667	2						210.588	275.882	7					283.333	338.667	4
	254.396	199.428	25					247.778	352.5	39						252.75	210.75	14					264.667	170.333	3						210.588	275.882	8					283.333	338.667	5
	255.045	199.297	26					248.611	352.5	40						254.75	211.25	15					266	170.667	4						210.588	274.706	9					283.333	336.667	6
	254.78	199.485	27					248.611	352.5	41						254.75	212	16					267	172	5						211.471	273.529	10					283.333	336.667	7
	255.519	199.918	28					248.611	352.5	42						255.5	212.25	17					267.333	174	6						211.471	273.529	11					283.333	335.333	8
	256.661	200.146	29					248.611	352.5	43						256	211.25	18					268.667	172.667	7						211.471	272.647	12					282.333	334.333	9
	256.643	200.919	30					248.333	352.778	44						258.5	212.75	19					268.333	171.667	8						211.471	270.294	13					282.333	334	10
	256.811	200.965	31					248.333	352.778	45						259.25	212.5	20					#%stop speckle%								211.471	270	14					282.667	334	11
	257.367	200.82	32					248.611	353.056	46						259.5	213	21					#%start speckle%								210.882	270	15					283	333.667	12
	258.135	201.034	33					248.611	353.056	47						260.75	212.75	22					286.471	115.588	1						211.471	268.824	16					282.667	332.667	13
	258.428	201.868	34					248.611	353.056	48						262.25	212	23					286.471	115.588	2						#%stop speckle%							282.333	332.667	14
	258.612	201.576	35					248.611	353.056	49						262.25	212.25	24					286.471	115.588	3						#%start speckle%							282	333	15
	259.039	202.008	36					248.611	353.056	50						#%stop speckle%							286.471	115.588	4						174.706	258.529	1					282	331.667	16
	259.519	202.477	37					248.889	352.5	51						#%start speckle%							286.471	115.588	5						174.412	258.235	2					282	331.667	17
	260.392	202.798	38					249.167	352.5	52						229.5	200	1					286.765	115.588	6						175	258.529	3					282	331	18
	260.712	202.934	39					249.167	352.5	53						230.75	201.5	2					286.765	115.588	7						174.412	257.647	4					282.667	331.333	19
	261.233	203.187	40					249.167	352.5	54						232	201.25	3					287.941	115.882	8						174.118	257.941	5					281.667	329.667	20
	261.751	203.481	41					249.167	352.5	55						233.75	201	4					288.529	115.882	9						173.529	257.647	6					280.667	329	21
	262.231	203.942	42					249.167	352.5	56						234.75	201.5	5					288.529	116.765	10						#%stop speckle%							281	329.667	22
	262.598	203.915	43					#%stop speckle%								236	202.25	6					289.118	116.765	11						#%start speckle%							280.667	328.667	23
	262.764	204.274	44					#%start speckle%								237.5	202.75	7					288.529	116.176	12						363.529	301.176	1					280.667	328.667	24
	263.502	204.077	45					254.768	218.407	1						238.25	202.5	8					289.706	116.176	13						362.353	302.059	2					280.667	328.667	25
	264.435	204.784	46					255.526	218.947	2						239.75	203	9					290.294	116.176	14						362.353	300.294	3					280.667	328.667	26
	264.772	204.843	47					255.789	218.684	3						241.25	203.75	10					290.294	115.294	15						362.059	300.588	4					280.333	328.333	27
	265.226	205.252	48					257.368	220.526	4						242	203.5	11					290.588	115.882	16						360	298.824	5					279.667	326.667	28
	265.269	205.279	49					#%stop speckle%								242.75	203.25	12					290.588	116.176	17						358.824	298.235	6					280	327	29
	266.321	205.562	50					#%start speckle%								244.25	203	13					290	115.588	18						357.941	297.353	7					279.333	326	30
	266.754	205.727	51					253.958	289.792	1						245.25	203.75	14					289.706	115	19						357.941	297.353	8					279.333	326	31
	267.462	205.727	52					253.75	289.375	2						246.5	205	15					289.118	116.176	20						356.765	296.471	9					278.667	325.333	32
	267.686	206.171	53					#%stop speckle%								249	203.75	16					#%stop speckle%								357.059	296.765	10					278.667	325.333	33
	267.759	206.215	54					#%start speckle%								250.75	204.5	17					#%start speckle%								355.588	294.706	11					278.667	325.333	34
	#%stop speckle%							265.556	468.889	1						248.75	203.75	18					346.538	428.462	1						355.882	293.824	12					#%stop speckle%
	#%start speckle%							265.556	469.167	2						250.5	204.75	19					347.308	429.231	2						356.176	292.941	13					#%start speckle%
	318.264	138.975	1					265.556	469.167	3						251.25	204.75	20					347.308	429.231	3						355.294	292.353	14					286.333	300	1
	318.814	139.378	2					265.556	469.167	4						252	204	21					347.692	428.462	4						355.294	291.176	15					285.333	298.667	2
	318.378	139.749	3					265.556	468.889	5						252.5	204.5	22					348.077	428.462	5						354.412	289.706	16					286.333	299	3
	318.841	140.602	4					265.556	468.056	6						253.25	204.5	23					348.077	428.462	6						354.706	289.706	17					#%stop speckle%
	319.121	140.881	5					265.556	468.056	7						255.25	205.25	24					348.077	427.692	7						354.412	288.824	18					#%start speckle%
	319.453	140.896	6					265.556	466.944	8						255.25	205.25	25					348.077	427.692	8						353.529	287.647	19					169.667	291.667	1
	319.229	141.137	7					265.833	466.944	9						256.5	205.75	26					348.077	426.154	9						353.235	287.353	20					170	290.333	2
	319.745	141.491	8					266.111	466.944	10						257.5	206.25	27					350.385	424.615	10						352.647	286.765	21					171	290.333	3
	320.2	141.522	9					266.111	466.944	11						259.25	206	28					350.385	424.615	11						352.941	285.882	22					170.667	289.667	4
	320.601	142.08	10					266.944	466.944	12						260	206.5	29					350.385	424.231	12						353.824	285	23					169.667	289	5
	321.021	142.309	11					266.944	466.944	13						260	207	30					350.769	423.462	13						352.647	284.706	24					169.667	289.333	6
	322.002	142.766	12					267.778	467.222	14						261.25	207.25	31					350.769	421.538	14						352.941	284.118	25					169.667	288.333	7
	322.418	142.785	13					268.056	465.833	15						262	207.5	32					350.769	421.538	15						#%stop speckle%							169.667	288.667	8
	322.831	143.606	14					268.056	465.833	16						262.25	207.75	33					350.769	421.538	16						#%start speckle%							169.667	287.667	9
	322.753	143.738	15					268.056	465.833	17						263	207.75	34					351.154	420.385	17						142.941	338.529	1					169.667	286.667	10
	#%stop speckle%							268.056	465.833	18						263.75	207.75	35					352.692	420	18						142.353	338.235	2					168.667	285.667	11
	#%start speckle%							268.056	465.833	19						265.75	207.5	36					351.923	418.846	19						142.941	337.059	3					169.333	285.333	12
	274.5	421	1					268.056	465.833	20						266.75	207.75	37					351.538	419.231	20						142.941	336.471	4					169	285.333	13
	275.75	421.5	2					268.056	465.833	21						267.5	207.75	38					352.692	419.615	21						143.235	335	5					169.667	285.333	14
	276	421.25	3					268.056	465.278	22						268.5	208.25	39					352.308	419.231	22						143.235	334.412	6					169	284.333	15
	276.5	421.25	4					268.889	466.111	23						269	208.25	40					351.538	418.462	23						143.235	333.824	7					169	283.333	16
	276.5	421.25	5					268.889	464.167	24						270	208.75	41					353.462	418.462	24						142.941	332.353	8					169	283	17
	276.5	421.25	6					269.722	464.167	25						270.25	208.25	42					353.077	418.462	25						143.824	330.882	9					170.667	283.667	18
	277	421.25	7					269.722	464.167	26						271	208.75	43					352.692	418.462	26						144.118	330.294	10					170.333	282.667	19
	277	421.25	8					269.722	464.167	27						271.5	209	44					352.692	417.692	27						144.118	328.529	11					170.333	283.333	20
	277	421.25	9					269.722	464.167	28						272.25	208.75	45					353.077	416.923	28						145.294	327.941	12					170.333	283	21
	277	421.25	10					269.722	464.167	29						273.75	209.25	46					353.846	417.692	29						144.412	326.765	13					170	282.667	22
	#%stop speckle%							269.722	464.167	30						274.75	208.25	47					353.846	417.692	30						144.118	325.882	14					170	282	23
	#%start speckle%							269.722	464.167	31						274	208.5	48					353.846	415.769	31						144.412	325	15					169.333	281.333	24
	271.875	173.75	1					270.278	463.333	32						275.75	209	49					352.308	413.846	32						145	325.588	16					168.333	280.333	25
	272.188	174.062	2					270.278	463.333	33						274.5	209.25	50					#%stop speckle%								144.706	324.118	17					168.667	281.333	26
	#%stop speckle%							270.278	463.333	34						275.5	209.75	51					#%start speckle%								144.706	324.118	18					167.667	280	27
	#%start speckle%							270.278	463.333	35						275.75	210	52					278.667	262.333	1						145	323.235	19					167.667	280.667	28
	305.136	167.711	1					270.278	463.333	36						275.25	210.5	53					278	262.667	2						145	321.471	20					166	280.333	29
	#%stop speckle%							270.278	463.333	37						#%stop speckle%							279.333	261.667	3						145.294	321.176	21					166.667	280.333	30
	#%start speckle%							270.278	463.333	38						#%start speckle%							279.667	262.333	4						145	319.706	22					167	280.333	31
	249.336	218.858	1					271.111	463.333	39						266.75	327.5	1					278.667	260.667	5						144.118	320	23					167.667	279.333	32
	249.801	218.99	2					271.111	463.333	40						268.5	327.75	2					278.667	261	6						144.412	319.118	24					168	278	33
	250.315	219.398	3					271.111	463.333	41						269.25	327.5	3					278.667	261	7						144.412	319.118	25					#%stop speckle%
	250.956	219.138	4					271.667	462.778	42						270.5	327.5	4					280	260	8						145.294	318.529	26					#%start speckle%
	251.277	219.492	5					271.667	462.778	43						271.25	327.5	5					278.333	260.667	9						145	315.588	27					327.667	274	1
	252.503	219.447	6					271.667	462.778	44						272	326.25	6					278.667	260	10						144.706	314.412	28					326.667	273.667	2
	252.693	220.022	7					271.667	462.778	45						273.25	326.75	7					279.333	261.333	11						144.412	311.765	29					326.667	273.333	3
	252.894	220.358	8					271.667	462.778	46						273.25	327	8					278.333	260	12						143.824	311.765	30					326.667	273	4
	253.534	220.396	9					271.667	462.778	47						274	326.25	9					278.333	260	13						143.824	310.294	31					325.667	272.667	5
	253.844	219.974	10					271.944	462.222	48						#%stop speckle%							279.333	256.667	14						145	309.118	32					325	272	6
	253.907	220.3	11					271.944	462.222	49						#%start speckle%							279	258	15						145	308.235	33					325.333	271.667	7
	255.753	220.909	12					271.944	462.222	50						257.5	371.5	1					279.333	258.333	16						144.412	307.059	34					325.333	271.667	8
	256.342	220.908	13					271.944	462.222	51						258	371.25	2					279.333	258.333	17						145	306.176	35					324.667	271.667	9
	256.609	221.011	14					272.222	461.667	52						259.25	370.5	3					279.333	259	18						#%stop speckle%							324.667	271.667	10
	256.507	221.322	15					272.222	461.667	53						260.75	370.25	4					279.667	258.667	19						#%start speckle%							324.333	271.667	11
	256.876	221.219	16					272.222	461.667	54						261	370	5					279.333	258.667	20						308.824	212.059	1					324.333	271.667	12
	257.545	221.273	17					272.222	461.667	55						262.5	369.5	6					278.333	258	21						308.824	210.882	2					324.333	271.667	13
	257.693	221.835	18					272.222	461.667	56						263	368.25	7					278	258.333	22						307.941	210.588	3					324.333	271.667	14
	258.174	221.905	19					272.222	461.667	57						263	368.5	8					278	259.667	23						306.765	209.706	4					324.333	271.667	15
	258.263	222.264	20					272.222	461.667	58						264.75	368.25	9					277.333	260.333	24						305.882	209.118	5					324.333	271.667	16
	258.446	221.991	21					272.222	461.667	59						264.75	367.75	10					275.667	259	25						305.882	208.824	6					324.667	271.667	17
	259.516	222.505	22					273.611	461.111	60						266.25	367	11					275.667	259	26						304.412	208.529	7					324.667	272.333	18
	259.598	222.469	23					273.611	461.111	61						266.5	366	12					275.333	261.333	27						304.412	207.941	8					324.333	271.333	19
	259.693	222.664	24					273.611	461.111	62						266.75	365.75	13					274.667	259.667	28						304.706	207.647	9					324.333	271.333	20
	259.939	222.69	25					273.611	461.111	63						267.75	365.25	14					276.333	259.333	29						304.706	207.941	10					324	271	21
	260.939	223.24	26					273.611	461.111	64						268.5	365	15					277	259	30						304.118	205.882	11					324	269.667	22
	262.211	223.442	27					273.333	461.111	65						269.75	364.75	16					276.667	258.667	31						303.824	205.882	12					324	269.333	23
	262.35	223.383	28					273.333	461.111	66						270	364	17					#%stop speckle%								#%stop speckle%							323	270	24
	262.027	223.475	29					273.056	460.833	67						271	363.75	18					#%start speckle%								#%start speckle%							322	270.667	25
	262.332	223.748	30					272.778	461.111	68						272	363.5	19					287.333	180	1						187.647	294.706	1					321.667	270.667	26
	263.362	224.065	31					272.778	461.111	69						271.75	363.5	20					288.333	180.667	2						186.176	292.941	2					321.667	270.667	27
	263.239	224.065	32					272.778	461.111	70						272.75	363.25	21					287.333	180.333	3						186.176	292.647	3					322	270.333	28
	264.441	224.225	33					272.778	461.111	71						273.5	363.75	22					289	181	4						186.471	292.059	4					322	270.333	29
	265.135	224.848	34					#%stop speckle%								273.75	362.75	23					289.333	181.333	5						187.059	291.471	5					322.667	270	30
	265.943	225.243	35					#%start speckle%								274.25	362	24					288.667	180	6						187.059	290.882	6					322.667	270	31
	265.937	224.812	36					244.375	297.292	1						#%stop speckle%							289.333	180	7						187.059	289.412	7					322.667	270	32
	266.022	225.532	37					245.417	297.708	2						#%start speckle%							289.333	180.333	8						187.059	289.412	8					322.667	270	33
	266.724	226.221	38					245	297.708	3						235.25	193.5	1					288.667	182.333	9						187.059	287.941	9					322.667	270	34
	#%stop speckle%							245	297.708	4						235	194.5	2					289.333	181.333	10						186.765	287.353	10					322.667	270	35
	#%start speckle%							245	297.708	5						236.25	195	3					289	182.667	11						186.471	286.765	11					322.667	270.333	36
	299.6	438.769	1					245	297.917	6						237.5	196.25	4					290.333	182.333	12						186.471	286.176	12					322.667	270.333	37
	#%stop speckle%							245	297.917	7						239	196.5	5					291.667	183	13						185.882	285.294	13					322.333	270.333	38
	#%start speckle%							245.833	298.958	8						240.25	195.5	6					291	183.333	14						185.882	284.706	14					322	270.333	39
	251.299	196.043	1					246.458	299.583	9						242.25	197.25	7					292.667	184.333	15						185.294	283.529	15					321	270	40
	251.748	195.998	2					246.25	297.708	10						242.75	196.5	8					290.667	184.333	16						185.882	283.529	16					321	270	41
	252.455	196.815	3					247.292	298.75	11						244.5	197.75	9					291.333	184.667	17						185.882	282.941	17					321	270	42
	252.98	196.609	4					247.292	298.75	12						245.75	198.25	10					290.333	184	18						185.882	281.765	18					321	270	43
	253.007	197.459	5					247.917	299.792	13						246.75	200	11					289.667	184.667	19						185.882	281.765	19					321	270	44
	253.666	197.551	6					246.458	298.958	14						#%stop speckle%							291	185	20						186.471	280.294	20					321.333	270	45
	254.044	197.7	7					246.042	298.542	15						#%start speckle%							291.667	185.667	21						185.882	280	21					323.333	269.333	46
	254.258	197.733	8					246.875	299.167	16						258.636	298.182	1					292	185.667	22						185.294	278.235	22					323.333	268.333	47
	254.917	197.798	9					246.667	299.583	17						259.545	297.273	2					292.333	185.667	23						184.706	277.941	23					323.333	268.333	48
	255.444	198.035	10					246.667	299.167	18						261.364	299.091	3					291.667	184	24						184.412	277.647	24					323.667	266.667	49
	255.751	198.593	11					246.667	299.167	19						261.818	297.727	4					291.667	184	25						184.706	276.765	25					324.333	266.667	50
	256.283	198.532	12					246.667	299.167	20						261.364	296.364	5					290.667	183.667	26						184.706	276.471	26					324.333	264.667	51
	256.671	198.587	13					246.667	299.167	21						264.545	298.636	6					292.333	184.667	27						185	276.471	27					324.333	264.667	52
	256.616	198.665	14					246.667	298.958	22						265	297.727	7					291.333	186.667	28						184.412	275.294	28					322.667	265.333	53
	256.737	198.854	15					246.667	298.958	23						266.364	297.273	8					291	184.667	29						184.118	275	29					322	264.667	54
	257.695	199.103	16					247.5	299.167	24						265.909	295.909	9					291	186	30						184.706	274.706	30					#%stop speckle%
	258.114	199.479	17					248.125	299.792	25						265.909	296.818	10					292	186	31						184.412	274.412	31					#%start speckle%
	258.174	199.648	18					248.125	299.792	26						266.818	296.364	11					292	186	32						184.412	273.824	32					281.667	352	1
	258.597	200.144	19					248.125	299.792	27						269.545	296.818	12					291.333	185.333	33						#%stop speckle%							280.667	351	2
	259.537	200.41	20					248.125	299.792	28						267.727	296.364	13					291.333	186.333	34						#%start speckle%							280.333	350.667	3
	259.822	200.635	21					247.292	299.583	29						268.182	296.364	14					290.667	186	35						271.874	204.571	1					280.333	350.333	4
	260.774	201.028	22					248.75	300	30						269.091	296.364	15					290	184.667	36						272.083	203.333	2					280.333	350	5
	261.048	201.03	23					248.125	299.792	31						#%stop speckle%							290	185.333	37						270.833	203.333	3					281	347.667	6
	261.144	201.15	24					247.917	299.792	32						#%start speckle%							290	184.333	38						269.167	202.5	4					281	347.667	7
	262.019	201.443	25					248.542	299.375	33						256	262	1					290.667	185	39						269.583	202.917	5					280.333	346	8
	261.793	201.42	26					248.542	299.583	34						257.75	261	2					291.333	185	40						268.333	202.083	6					281	347	9
	262.371	201.594	27					248.542	299.583	35						#%stop speckle%							289.667	185	41						266.25	200.417	7					279.333	347	10
	262.905	201.885	28					248.542	299.583	36						#%start speckle%							290	183.667	42						266.667	201.25	8					280.333	347	11
	263.364	201.955	29					248.75	300.208	37						241.5	244	1					289	185.667	43						265.833	201.25	9					281	344.667	12
	263.448	202.126	30					249.167	300	38						241.75	243.5	2					289.667	186	44						265.833	200.833	10					280.667	342.667	13
	263.766	202.6	31					249.375	300	39						242.75	244	3					289.667	186.333	45						266.25	200	11					279.333	343	14
	264.501	203.045	32					249.375	300	40						244.75	244.75	4					291	185.667	46						266.25	200.833	12					280	343	15
	264.59	203.153	33					249.375	300	41						245.5	244.75	5					291	186	47						265	200.833	13					280	343	16
	265.556	203.316	34					249.375	300	42						247.75	244.75	6					289	185	48						265	198.333	14					280	343	17
	265.825	204.079	35					249.375	300.208	43						248.25	244.75	7					290	185	49						#%stop speckle%							279.667	343	18
	266.355	204.257	36					249.375	300.208	44						249	245	8					289.333	185	50						#%start speckle%							279.667	343	19
	267.23	204.336	37					250.625	300.208	45						249	245	9					289.667	185	51						179.412	378.824	1					279.667	343	20
	268.011	204.698	38					250	300	46						251.5	245	10					289.667	186	52						179.118	377.059	2					279.667	343	21
	268.265	204.918	39					249.792	300.417	47						252.75	244.75	11					288.667	185	53						179.706	375	3					279.667	343	22
	268.243	204.985	40					249.375	301.042	48						253.25	244.75	12					288.667	185	54						#%stop speckle%							279	341.667	23
	269.326	205.001	41					249.792	300.833	49						254.75	245.25	13					#%stop speckle%								#%start speckle%							278.333	341	24
	269.41	205.503	42					250.208	301.042	50						255.75	245.5	14					#%start speckle%								315.294	321.471	1					278.333	341	25
	269.526	205.543	43					250.208	301.042	51						254.75	245.5	15					227.647	219.706	1						315	321.471	2					278.333	339.667	26
	270.526	205.649	44					250.208	301.042	52						256.25	245.25	16					228.529	220	2						314.118	320.882	3					278.333	339.667	27
	271.125	205.8	45					250.208	301.042	53						258	245.5	17					229.706	220.588	3						314.118	320.588	4					278	339.333	28
	271.708	206.007	46					250.208	301.042	54						259.25	245.5	18					229.706	220.588	4						314.118	318.235	5					278	339.333	29
	271.929	206.255	47					250.208	301.042	55						259.25	245.25	19					231.471	220.882	5						313.235	317.647	6					278	339.333	30
	272.904	206.979	48					250.208	301.042	56						260.25	245.25	20					230.588	220.882	6						313.235	316.765	7					276.667	337.333	31
	272.783	206.879	49					250.208	301.042	57						261.25	245.25	21					231.471	221.471	7						312.059	314.706	8					276.667	337.333	32
	272.929	206.976	50					250.208	301.042	58						263.75	245.75	22					232.059	221.765	8						312.059	314.412	9					277.333	335.667	33
	273.524	207.309	51					250.208	301.042	59						264.5	245.5	23					232.647	221.471	9						311.471	312.059	10					277.333	336	34
	273.905	207.082	52					250.208	301.042	60						266	244.25	24					#%stop speckle%								310.294	312.353	11					277.333	336	35
	274.286	207.536	53					250.208	301.042	61						265.75	245.5	25					#%start speckle%								310.588	311.471	12					276.667	335.333	36
	275.087	207.505	54					251.458	300.417	62						#%stop speckle%							351.732	421.987	1						310.294	310.882	13					276.667	335.333	37
	#%stop speckle%							252.083	300.417	63						#%start speckle%							354.231	421.154	2						310	310.588	14					275.667	334.667	38
	#%start speckle%							251.875	300.417	64						267.75	349.25	1					353.846	420.769	3						309.118	310.294	15					275.667	334.667	39
	250.363	303.002	1					251.875	300.417	65						269	349	2					353.846	420.769	4						310	310	16					275.667	334.667	40
	250.341	303.109	2					251.875	300.417	66						270.5	348.75	3					353.846	420.385	5						310	309.118	17					275.667	334.667	41
	249.75	303.5	3					251.875	300.417	67						270.5	348.25	4					353.846	419.615	6						309.706	307.941	18					275.667	334.667	42
	250.72	304.227	4					251.875	300.417	68						271.75	348	5					353.846	419.615	7						309.706	307.941	19					275.667	334.667	43
	251.045	304.353	5					251.667	300.417	69						272	347	6					353.846	419.231	8						308.235	306.765	20					275.667	334.667	44
	250.991	304.277	6					251.667	300.417	70						272.75	346.5	7					354.615	419.231	9						310	307.353	21					275.667	334.667	45
	251.132	304.4	7					251.875	300.417	71						273.25	345.75	8					355.385	418.077	10						309.118	305.294	22					275.667	334.667	46
	250.839	304.809	8					#%stop speckle%								274.25	346	9					355.385	418.077	11						307.353	304.706	23					275.667	334.667	47
	251.5	303.75	9					#%start speckle%								275	345.75	10					356.154	416.538	12						309.118	303.529	24					275.667	334.667	48
	252.5	304	10					261.042	291.042	1						275.5	345.5	11					356.154	416.923	13						309.706	302.353	25					275.667	334.667	49
	253	304	11					262.917	291.667	2						276.25	345	12					356.538	416.154	14						308.824	301.176	26					275.667	334.667	50
	253.335	303.71	12					262.083	291.25	3						277	345	13					357.308	416.923	15						308.235	300.882	27					275.667	334.667	51
	254.142	304.298	13					#%stop speckle%								277.5	344.5	14					357.308	415.769	16						309.412	300.294	28					275.667	334.667	52
	254	303.5	14					#%start speckle%								277.75	344	15					357.308	415.769	17						308.824	299.706	29					275.667	334.667	53
	255.5	304.75	15					278.542	426.667	1						278.5	343.25	16					358.077	414.615	18						308.824	298.529	30					275.667	334.667	54
	255.5	304.75	16					278.125	426.875	2						279	343.25	17					358.077	414.615	19						#%stop speckle%							#%stop speckle%
	256	304.75	17					278.958	426.25	3						279.5	343	18					358.077	414.615	20						#%start speckle%							#%start speckle%
	256.25	304.75	18					278.75	426.875	4						280	343.5	19					358.077	414.615	21						197.647	310.588	1					117.667	228.667	1
	256.5	304.5	19					278.75	426.25	5						279.75	343.75	20					358.462	414.615	22						197.059	309.706	2					118.667	227.333	2
	257.75	305	20					279.167	426.458	6						280.25	342.75	21					358.462	414.615	23						197.059	309.118	3					117.333	228	3
	258.25	304.75	21					279.167	426.458	7						281	342	22					359.231	414.615	24						197.059	309.118	4					116.667	227.333	4
	258	305.5	22					279.375	426.458	8						282.5	342	23					360.769	414.231	25						196.765	307.647	5					115.333	228	5
	258.25	305	23					279.375	426.458	9						282.5	341.75	24					360	414.231	26						197.353	307.647	6					114.667	228	6
	258.5	305.25	24					279.375	426.458	10						282.5	341.75	25					359.615	414.231	27						196.471	307.059	7					115	227.667	7
	258.5	305.25	25					278.958	426.458	11						281.75	341.25	26					360	414.231	28						196.471	307.353	8					117.333	227.667	8
	259.5	305	26					279.167	425.833	12						282.75	340.25	27					361.538	414.231	29						197.059	305.882	9					#%stop speckle%
	259.75	305	27					279.167	426.458	13						282	340	28					361.154	414.231	30						#%stop speckle%							#%start speckle%
	260	305	28					279.167	426.458	14						283	340.5	29					360.769	414.231	31						#%start speckle%							269.333	246.333	1
	260.25	305	29					279.167	426.458	15						283.5	339.75	30					361.154	413.462	32						252.353	241.176	1					269	247.333	2
	261.25	305	30					279.583	426.458	16						283.75	338.75	31					361.154	413.462	33						252.353	242.059	2					269.667	246.333	3
	261.75	305.25	31					279.792	426.667	17						#%stop speckle%							361.538	413.462	34						252.647	241.471	3					269.667	246.333	4
	262	305.25	32					280.208	426.458	18						#%start speckle%							361.154	411.923	35						252.353	240	4					269.333	246.667	5
	261.75	305.5	33					280.208	426.458	19						254.5	331	1					361.923	413.462	36						252.647	240.294	5					269.333	246.667	6
	262.5	305	34					280.208	426.458	20						255.25	330.25	2					361.923	413.462	37						251.765	240	6					269.333	246.667	7
	263.25	305.75	35					280.208	426.458	21						255.75	330	3					361.923	413.462	38						252.059	238.824	7					269	246.667	8
	263.25	305.75	36					279.792	426.458	22						256.25	330	4					361.923	413.462	39						250.882	237.059	8					268.333	246.333	9
	263.25	305.75	37					279.792	426.458	23						257.75	330.25	5					361.923	413.077	40						250.882	237.353	9					268.333	245.667	10
	263.5	305.75	38					279.792	426.458	24						258	330.25	6					361.923	412.692	41						250.882	236.176	10					268.333	245.667	11
	264.75	306	39					279.792	426.458	25						259.5	330	7					361.923	412.308	42						250.294	235	11					267.333	245.333	12
	265	306	40					279.792	426.458	26						260.5	329.25	8					361.923	411.923	43						250.294	234.412	12					267.333	245.333	13
	265.5	306.75	41					279.583	426.25	27						261.75	329.25	9					361.538	411.538	44						249.412	234.412	13					267.333	245.333	14
	266.25	306.75	42					280.417	426.042	28						263.5	329.25	10					361.538	411.538	45						250	233.824	14					267.333	245.333	15
	267.75	306.25	43					280.833	426.042	29						264	328.75	11					361.538	411.538	46						250	232.941	15					267.333	245.333	16
	267	306.75	44					280.833	425.833	30						265.25	328.25	12					361.538	411.538	47						249.706	232.941	16					267.333	245.333	17
	267.5	307	45					280.833	425.833	31						265.75	328	13					361.538	411.538	48						249.118	232.941	17					267.333	245.333	18
	268.25	307.5	46					280.208	426.25	32						266.75	328	14					361.538	411.538	49						247.941	232.647	18					267.333	245.333	19
	268.75	307.75	47					280.625	426.25	33						267.25	326.5	15					361.538	411.538	50						248.235	232.353	19					267.333	245.333	20
	268.75	307.75	48					281.042	425.833	34						267.5	326.5	16					361.538	411.538	51						247.059	230.882	20					267.333	245.333	21
	268.5	307.5	49					280.833	426.042	35						268	327	17					361.538	411.538	52						246.176	230	21					267.333	245.333	22
	269.25	308.25	50					280.625	426.667	36						269.25	326.75	18					361.538	411.538	53						245.588	230	22					267	245.667	23
	269.75	307.75	51					280.625	426.667	37						270.25	326.5	19					361.538	411.538	54						245	229.118	23					267	245.667	24
	269.75	307.75	52					280.625	426.667	38						270.25	325.5	20					#%stop speckle%								244.412	229.412	24					267	245.667	25
	269.75	307.75	53					280.625	425.625	39						271.25	325.25	21					#%start speckle%								245	226.765	25					267	245.667	26
	270.5	307.5	54					280.833	425.417	40						272	325	22					259.667	280	1						246.176	226.765	26					267	245.667	27
	#%stop speckle%							280.833	425.417	41						273.5	325.25	23					261.333	280	2						245	226.471	27					267	245.667	28
	#%start speckle%							280.833	425.417	42						273.5	325	24					261.667	279.333	3						245	225.882	28					266.667	245.667	29
	272.539	414.123	1					280.833	425.417	43						274	324.75	25					262	279.333	4						244.412	225.882	29					266.667	245.667	30
	273.014	414.858	2					280.833	425.417	44						274.75	324.75	26					261	278	5						244.412	225.882	30					267.333	244.667	31
	272.767	414.805	3					280.833	425.417	45						275.5	324.75	27					262.667	277.333	6						244.412	224.706	31					267	245	32
	273.024	414.737	4					280.833	425.417	46						274	325	28					262.667	277.667	7						243.824	223.824	32					266.667	244.667	33
	273.091	414.708	5					280.833	425.417	47						274.75	325	29					263.333	278	8						244.118	223.529	33					266.667	244.667	34
	273.008	414.993	6					280.833	425.417	48						274.75	325.25	30					264.667	277.333	9						244.118	223.235	34					266.667	244.667	35
	272.931	414.902	7					280.833	425.417	49						275.25	325	31					265.333	278.667	10						243.235	223.235	35					266.667	244.667	36
	273.004	414.814	8					280.833	425.417	50						274.5	325.5	32					265	277	11						243.235	223.235	36					267.333	244.333	37
	272.921	414.778	9					280.833	425.417	51						275	325.25	33					265	278.667	12						243.235	222.941	37					267.333	244.333	38
	273.012	414.886	10					280.833	425.417	52						275.25	325	34					265.333	278.667	13						243.235	221.765	38					267	244.667	39
	272.846	414.973	11					280.833	425.625	53						275.75	324.5	35					264.667	278	14						238.824	221.765	39					267	244.667	40
	273.823	414.114	12					281.458	426.042	54						275.75	324.5	36					264.667	277	15						240	221.176	40					267	244.333	41
	273.856	414.16	13					281.458	426.042	55						275.75	324.5	37					265	276.333	16						240.588	220	41					267	244.333	42
	273.8	414.343	14					281.458	426.042	56						276	324	38					264.333	275.667	17						239.412	219.118	42					267	244.333	43
	273.88	414.364	15					281.458	426.042	57						276.25	323.75	39					263.333	274.667	18						238.235	219.706	43					267	244.333	44
	273.959	414.404	16					281.458	426.042	58						276.5	325	40					263.667	274	19						237.941	218.529	44					267	244.333	45
	#%stop speckle%							281.458	426.042	59						276.5	325	41					#%stop speckle%								237.941	218.529	45					267	244.333	46
	#%start speckle%							281.458	426.042	60						276.5	324.25	42					#%start speckle%								237.647	218.529	46					267	244.333	47
	259.062	394.062	1					281.458	426.042	61						277	324.25	43					330.333	440.333	1						236.176	217.353	47					267	244.333	48
	260.312	394.062	2					281.458	426.042	62						277.75	324.5	44					331	440	2						236.765	217.059	48					267	244.333	49
	260.312	394.062	3					280.208	426.875	63						277.75	324.5	45					331.667	437.333	3						237.353	216.471	49					267	244.333	50
	260.312	394.375	4					281.042	426.667	64						277.25	323.5	46					332.667	437	4						236.176	215.588	50					267	244.333	51
	260.312	394.375	5					281.667	427.083	65						278.25	324.25	47					332.667	436	5						235.882	215.588	51					267	244.333	52
	260.312	394.375	6					282.083	426.875	66						278.25	324.25	48					333	434.667	6						239.706	214.706	52					267	244.333	53
	260.312	394.375	7					282.083	426.875	67						279	323.5	49					334	434	7						238.529	214.412	53					267	244.333	54
	260.312	394.375	8					282.083	426.875	68						#%stop speckle%							334.333	433	8						238.529	214.412	54					#%stop speckle%
	260.312	394.375	9					282.083	427.083	69						#%start speckle%							335.333	431.667	9						#%stop speckle%							#%start speckle%
	261.562	394.375	10					281.458	427.083	70						269.5	128	1					336	431	10						#%start speckle%							150	222.143	1
	261.562	394.375	11					281.458	427.5	71						269.75	128.75	2					336.333	430.667	11						297.059	289.706	1					150.357	222.143	2
	261.562	394.375	12					#%stop speckle%								271.25	129.25	3					336.667	429.333	12						297.353	288.824	2					150.357	221.786	3
	261.562	394.375	13					#%start speckle%								271.25	129.25	4					337	428.667	13						297.059	288.235	3					150.357	221.786	4
	262.5	394.375	14					279.474	192.368	1						273.25	130	5					336.667	427	14						296.765	287.353	4					150.357	221.786	5
	262.5	394.375	15					279.737	192.895	2						274.75	130.75	6					337.333	425.667	15						296.176	285	5					150.357	221.786	6
	262.5	394.375	16					279.737	192.895	3						275.75	131	7					337.333	424	16						296.765	285	6					150.357	221.786	7
	263.438	394.375	17					279.737	192.895	4						276.5	131.5	8					338.667	424.667	17						#%stop speckle%							150.357	221.786	8
	264.062	393.125	18					279.737	193.158	5						278	131.75	9					338.667	424	18						#%start speckle%							150.357	221.786	9
	264.062	393.125	19					280.263	193.684	6						278.75	132.75	10					338.667	423	19						324.583	147.917	1					149.643	220.714	10
	264.062	393.125	20					280.263	193.684	7						280	132.5	11					339	421.667	20						324.167	147.917	2					149.643	220.714	11
	264.375	393.125	21					280.789	194.211	8						280	132.75	12					339.333	421	21						323.333	147.917	3					149.643	220.714	12
	265.625	393.438	22					281.842	195	9						281.75	134	13					338.333	420	22						323.333	147.917	4					149.643	220.714	13
	266.562	393.438	23					281.579	195	10						281.5	133.75	14					340.667	420	23						322.917	147.917	5					149.643	220.714	14
	266.562	393.438	24					281.579	195.526	11						283	135	15					339.333	418.667	24						322.5	147.917	6					149.643	220.714	15
	267.188	393.438	25					281.316	195.263	12						284.75	134.75	16					340.333	417.667	25						322.5	147.917	7					149.643	220.714	16
	267.188	393.438	26					282.105	195	13						285.25	135.25	17					340.667	417	26						322.5	147.917	8					149.286	220.357	17
	268.125	393.438	27					282.105	195	14						286.25	135.75	18					340.333	418.333	27						322.5	146.667	9					148.929	220.357	18
	268.125	393.438	28					283.158	195.263	15						286.75	136	19					340	416.333	28						321.667	146.667	10					149.286	219.286	19
	268.125	393.438	29					283.158	195.789	16						287.25	136.25	20					340.333	417.333	29						320.833	146.25	11					149.286	219.286	20
	268.125	393.438	30					283.158	195.526	17						288	136.5	21					341.667	418	30						320.833	146.25	12					149.286	219.286	21
	268.125	393.438	31					283.421	195.263	18						289.25	136.5	22					341.667	416.333	31						321.25	146.25	13					149.286	219.286	22
	268.75	392.812	32					283.684	195.263	19						289.5	136.75	23					341.667	417	32						320	146.25	14					149.286	219.286	23
	268.75	392.812	33					283.684	195.263	20						289.75	137	24					340.333	415.667	33						320.417	146.667	15					149.286	219.286	24
	270.312	393.125	34					283.684	195.263	21						291	137.25	25					341	417.667	34						320.417	146.667	16					149.286	219.286	25
	270.312	393.125	35					283.947	195.263	22						291	137.25	26					340.667	418	35						319.167	146.25	17					149.286	219.286	26
	270.312	393.125	36					283.947	195.263	23						291.75	137.25	27					341	417.667	36						318.75	147.5	18					149.286	219.286	27
	269.688	392.5	37					283.947	195.263	24						291.75	137.25	28					341.667	416.333	37						317.917	146.667	19					149.286	219.286	28
	270.625	392.5	38					285.263	195.526	25						292.5	138	29					341.667	416.667	38						317.083	145.417	20					149.286	219.286	29
	270.625	392.5	39					285.263	195.789	26						292.75	138.25	30					#%stop speckle%								318.333	146.25	21					149.286	219.286	30
	#%stop speckle%							286.053	195.789	27						#%stop speckle%							#%start speckle%								316.667	146.25	22					149.286	219.286	31
	#%start speckle%							286.053	196.053	28						#%start speckle%							263.824	257.059	1						317.083	145.417	23					149.286	219.286	32
	290.25	320	1					286.053	196.053	29						303.5	45.5	1					265.294	256.765	2						318.75	146.667	24					149.286	219.286	33
	290	319.5	2					286.579	196.842	30						304.75	46.25	2					266.176	257.059	3						316.667	144.583	25					149.286	219.286	34
	290	319.5	3					286.842	196.053	31						306.75	47	3					266.176	257.647	4						317.917	146.667	26					149.286	219.286	35
	#%stop speckle%							#%stop speckle%								307.5	48	4					265.588	257.353	5						317.917	143.75	27					149.286	219.286	36
	#%start speckle%							#%start speckle%								308.75	48.75	5					265.882	257.059	6						318.333	144.583	28					149.286	219.286	37
	288	311.75	1					252.368	192.632	1						309	49.5	6					265.294	256.765	7						317.083	145.833	29					149.286	219.286	38
	287.25	312.25	2					253.421	193.421	2						310	49.5	7					266.176	257.353	8						317.5	145.833	30					149.286	219.286	39
	287.25	312.25	3					253.158	193.421	3						311.25	50.25	8					267.059	256.765	9						317.5	145.833	31					149.286	219.286	40
	287	312.5	4					253.158	193.421	4						311.5	50.5	9					266.176	257.647	10						317.5	145.833	32					149.286	219.286	41
	#%stop speckle%							253.947	193.684	5						312.25	51.25	10					266.765	257.941	11						317.5	146.25	33					149.286	219.286	42
	#%start speckle%							253.684	194.474	6						312.75	51.75	11					267.353	257.353	12						317.5	146.667	34					148.571	218.571	43
	291.562	459.375	1					253.684	194.474	7						314.25	52.25	12					265.882	257.941	13						317.5	146.667	35					148.929	218.571	44
	293.438	460.625	2					253.684	194.474	8						315	53	13					#%stop speckle%								317.5	146.667	36					147.5	217.5	45
	292.5	457.812	3					253.947	194.474	9						316	52.75	14					#%start speckle%								316.25	147.083	37					147.5	217.5	46
	292.5	457.812	4					253.947	194.474	10						317	53.75	15					302.692	338.846	1						315.417	146.25	38					147.5	217.5	47
	293.438	459.062	5					253.947	194.474	11						317.75	54.5	16					301.923	340	2						315	145.833	39					147.5	217.5	48
	294.062	457.812	6					254.474	195	12						317.25	54.5	17					301.923	339.231	3						#%stop speckle%							147.5	217.5	49
	292.5	459.062	7					254.474	195	13						318.5	55.25	18					301.923	338.846	4						#%start speckle%							147.5	217.5	50
	293.75	458.125	8					#%stop speckle%								319.75	55.5	19					303.077	339.231	5						146.471	339.706	1					147.5	217.5	51
	293.75	458.125	9					#%start speckle%								320.5	56.25	20					303.077	338.846	6						145.882	339.412	2					147.5	217.5	52
	293.75	458.125	10					234.737	246.579	1						321.25	56.5	21					301.538	338.077	7						145.588	339.118	3					147.5	216.786	53
	293.75	458.125	11					234.737	245.789	2						321.25	57	22					300.385	338.846	8						145.882	338.824	4					147.857	216.429	54
	295.312	457.188	12					235.789	246.053	3						321.25	57.75	23					298.846	341.154	9						145.588	337.059	5					#%stop speckle%
	295.312	457.188	13					235.526	245.789	4						322.75	58.5	24					300.385	339.231	10						146.765	336.176	6					#%start speckle%
	295.312	457.188	14					235.789	245.789	5						323.5	58.75	25					300.769	339.231	11						145.882	334.706	7					138	237	1
	295.312	457.188	15					236.579	245.789	6						323.5	59	26					299.615	340	12						146.176	334.412	8					138	237	2
	295.312	456.875	16					236.316	246.316	7						323.25	59.5	27					300.769	340.385	13						146.471	333.529	9					139	237.667	3
	295.312	456.875	17					237.368	246.842	8						322.5	59.5	28					300	339.231	14						146.765	332.059	10					140	237	4
	295.625	456.875	18					237.105	246.579	9						325.25	61.25	29					300	338.846	15						147.353	332.353	11					140	237	5
	295.625	456.875	19					237.895	247.105	10						326.5	62.25	30					300.385	338.077	16						147.353	330	12					140	237	6
	296.25	455.938	20					237.895	247.105	11						#%stop speckle%							298.846	336.923	17						147.353	331.176	13					140	236.667	7
	296.25	455.938	21					237.632	247.105	12						#%start speckle%							300.769	338.077	18						#%stop speckle%							140	236.667	8
	296.25	454.688	22					237.632	247.105	13						255	168	1					298.462	339.231	19						#%start speckle%							140	236.667	9
	296.25	455	23					237.895	247.105	14						256.5	169	2					297.308	339.231	20						275	333.235	1					140	236.667	10
	297.5	455	24					237.895	247.105	15						258	169.5	3					296.154	339.231	21						274.118	332.647	2					140	236.667	11
	297.5	455	25					238.684	247.368	16						259.25	169.75	4					297.692	340	22						273.235	331.471	3					140	236.667	12
	297.812	453.75	26					238.947	247.895	17						259.75	169.75	5					296.538	340	23						274.412	331.176	4					140	236.667	13
	297.812	453.75	27					239.474	247.895	18						260.25	169.75	6					295.769	340	24						273.529	329.118	5					140	236.667	14
	298.125	453.125	28					239.474	247.632	19						262.75	170.25	7					295	340.385	25						272.353	328.235	6					140	236.667	15
	298.125	453.125	29					240.526	247.368	20						263	171	8					294.615	342.692	26						272.647	326.765	7					140	237	16
	299.375	451.875	30					240.526	247.368	21						263.5	171	9					296.923	342.692	27						272.647	326.176	8					138.667	236	17
	299.375	451.875	31					240.526	247.368	22						264.75	171.25	10					296.154	342.308	28						272.059	324.706	9					138.333	235	18
	299.375	451.875	32					240.526	247.632	23						266	171.75	11					294.615	342.692	29						271.765	324.412	10					138.667	234.333	19
	300.312	451.875	33					240.263	247.632	24						267	172.25	12					293.077	343.846	30						270.882	322.647	11					138.667	234.333	20
	300.312	451.875	34					241.053	247.895	25						267.75	171.75	13					294.231	344.615	31						271.471	322.059	12					138.667	234.333	21
	301.25	451.25	35					241.316	247.632	26						268.25	173	14					293.462	344.615	32						271.471	321.765	13					138.667	234.333	22
	301.25	451.25	36					241.316	247.632	27						269.75	174.25	15					291.538	346.154	33						271.471	320.588	14					138.667	234.333	23
	301.25	450.625	37					241.316	247.632	28						270.75	173.5	16					290.769	345.769	34						271.471	320.588	15					138.667	234.333	24
	301.25	450.625	38					241.053	247.632	29						272	173.75	17					290	347.692	35						271.765	320	16					140	234	25
	301.25	450.625	39					241.053	247.632	30						273.5	174	18					289.231	348.846	36						270.294	319.118	17					140	234	26
	301.875	450.625	40					241.053	247.632	31						274.5	174	19					289.231	350.769	37						270.294	318.824	18					140	234	27
	301.875	450.625	41					241.842	248.158	32						275.25	174	20					288.077	350.385	38						270.588	318.529	19					140	233	28
	302.5	450	42					242.368	248.421	33						275.5	173.75	21					288.462	350.769	39						270	319.118	20					140	232.667	29
	302.5	450	43					242.105	248.421	34						278	174	22					288.462	350.769	40						269.706	318.529	21					140	232.667	30
	302.812	450	44					242.105	248.421	35						280	174.25	23					286.538	351.538	41						268.529	316.765	22					140	232.667	31
	302.812	450	45					242.368	248.421	36						280	173	24					286.538	351.154	42						268.529	316.765	23					140	232.667	32
	303.438	449.688	46					242.368	248.421	37						281.75	173.25	25					286.538	351.538	43						268.529	316.765	24					140	232.667	33
	303.438	449.688	47					242.895	248.684	38						282.5	174	26					287.692	351.923	44						268.529	316.765	25					141.333	232.667	34
	303.438	449.375	48					242.895	248.684	39						282.75	173.5	27					287.692	351.923	45						268.529	316.765	26					141.333	232.667	35
	303.75	449.375	49					243.421	248.947	40						283.5	172.75	28					287.692	351.538	46						268.235	315.294	27					141.333	232.667	36
	304.062	449.375	50					243.421	248.947	41						284.5	172.75	29					#%stop speckle%								269.118	316.176	28					141.333	232.667	37
	304.062	449.375	51					243.421	248.947	42						285	173.5	30					#%start speckle%								268.824	315	29					141.333	232.667	38
	305.312	449.375	52					243.684	248.947	43						285	174.25	31					290.333	107	1						268.824	315	30					141.333	232.667	39
	305.312	449.375	53					243.684	248.947	44						#%stop speckle%							289.667	107.667	2						267.941	314.706	31					141.333	232.333	40
	305.312	449.375	54					244.211	249.737	45						#%start speckle%							292	108	3						267.941	313.529	32					141.333	232.333	41
	#%stop speckle%							244.474	248.947	46						276.364	115.909	1					293	109	4						268.235	312.059	33					139.667	229.667	42
	#%start speckle%							244.474	249.211	47						277.273	116.364	2					292.667	109	5						267.647	310.588	34					139.667	229.333	43
	258.043	443.325	1					244.737	249.211	48						277.273	116.364	3					293.667	110	6						267.059	309.706	35					139.667	229.333	44
	258.437	443.286	2					245	249.211	49						278.182	115.909	4					293.667	109.333	7						267.647	310.588	36					139.667	229.333	45
	258.525	443.075	3					244.737	249.211	50						#%stop speckle%							293	109	8						267.059	310.294	37					139.667	229.333	46
	258.785	442.779	4					244.737	249.211	51						#%start speckle%							293.667	109.333	9						266.471	310.588	38					139.667	229.333	47
	258.794	442.539	5					245	249.474	52						259.25	382.75	1					294.333	109.333	10						265.588	308.235	39					139.667	229.333	48
	259.478	442.777	6					245	249.211	53						260.25	382	2					294	110	11						266.471	308.529	40					139.667	229.333	49
	259.874	442.245	7					245	249.211	54						261.75	381.5	3					294.333	109.333	12						265.588	307.059	41					139.667	229.333	50
	260.148	442.216	8					245	249.211	55						262.75	381.75	4					294.667	110	13						265.882	306.765	42					142	228	51
	260.398	442.25	9					245.263	249.474	56						263.5	381	5					293.667	109.667	14						265.588	306.471	43					142	228	52
	260.808	442.299	10					246.316	250.789	57						264	380	6					294.333	109.333	15						265	305.882	44					142	228	53
	260.995	442.14	11					246.316	251.053	58						264.5	378.75	7					293.667	109	16						265.294	306.765	45					142	227.667	54
	261.688	441.919	12					246.316	251.053	59						265.75	379	8					293.333	109.667	17						265.294	305.294	46					#%stop speckle%
	261.636	441.729	13					246.316	251.053	60						266.25	377.75	9					294.333	109	18						264.706	303.235	47					#%start speckle%
	262.044	441.704	14					247.368	250.789	61						267.5	377.5	10					293.333	108.667	19						264.412	302.647	48					324.667	345.667	1
	262.57	441.806	15					247.105	251.842	62						267.75	377	11					292.333	108.667	20						263.824	302.647	49					324	344.667	2
	262.715	441.898	16					247.105	251.316	63						267.75	376.75	12					293	107.667	21						264.118	302.941	50					324.333	342.667	3
	262.838	441.49	17					247.632	251.842	64						269.25	376.5	13					292.333	109	22						#%stop speckle%							323.667	343	4
	262.954	441.489	18					247.895	252.105	65						269.25	376	14					292.667	109.333	23						#%start speckle%							323	343.667	5
	263.554	441.348	19					247.632	252.368	66						270	375	15					291.667	108.667	24						115.588	278.824	1					322.333	343.667	6
	264.144	441.058	20					247.632	252.368	67						270.75	374.5	16					291.667	107.333	25						116.471	279.118	2					322.333	343.333	7
	264.061	440.585	21					247.632	252.368	68						271.5	374.75	17					292.667	105.667	26						115.588	277.941	3					322.333	341.667	8
	264.726	439.978	22					247.895	252.632	69						272.5	374.5	18					292.667	105.667	27						115.882	276.176	4					321.667	342	9
	265.126	440.839	23					248.158	252.105	70						273.5	373.75	19					293	105.667	28						116.471	275.588	5					321.667	342	10
	#%stop speckle%							247.895	252.105	71						273.75	374	20					293	104.333	29						115.882	275	6					321.667	341.667	11
	#%start speckle%							#%stop speckle%								274.25	373.75	21					292	104.667	30						116.176	274.118	7					321.667	341.667	12
	244.601	419.581	1					#%start speckle%								275.5	373.25	22					293	104.667	31						116.471	273.235	8					321.667	341.667	13
	244.837	419.744	2					228.333	312.083	1						277	372	23					293.333	104	32						116.471	272.353	9					321.333	340	14
	245.372	419.59	3					228.542	312.292	2						278	371.25	24					293	103	33						116.471	271.176	10					321.667	340.667	15
	246.1	419.464	4					228.542	312.292	3						278.5	369.75	25					294	102.333	34						116.471	270.882	11					321.667	339.667	16
	245.989	419.863	5					#%stop speckle%								278	369.5	26					293.667	102.333	35						116.471	270	12					321.333	338	17
	246.329	419.809	6					#%start speckle%								278	370.75	27					293.667	103.667	36						116.765	268.235	13					320.667	338.333	18
	246.842	419.827	7					250.556	343.056	1						279	369.75	28					292.667	102.333	37						116.176	267.353	14					320.667	336.667	19
	246.878	419.722	8					250.556	343.333	2						#%stop speckle%							293	102.333	38						116.471	266.176	15					320	337	20
	247.374	419.392	9					250.833	343.056	3						#%start speckle%							293.333	102	39						115.882	265.588	16					320.333	337	21
	247.758	419.286	10					250.833	343.056	4						242	333.75	1					293.667	102	40						116.765	265.882	17					320.333	337	22
	248.031	419.308	11					251.667	342.778	5						242.5	334	2					294.667	101.667	41						116.765	264.412	18					#%stop speckle%
	248.334	419.088	12					251.389	342.5	6						243.5	333.75	3					#%stop speckle%								115.588	262.941	19					#%start speckle%
	248.562	419.029	13					251.389	342.5	7						243.5	333.75	4					#%start speckle%								116.176	263.529	20					371.071	195.357	1
	249.092	418.664	14					251.389	342.5	8						244.5	333.25	5					245.588	135.588	1						116.176	263.824	21					371.429	195.714	2
	#%stop speckle%							251.389	342.5	9						246	332	6					246.176	135.882	2						115.882	262.941	22					371.429	195.714	3
	#%start speckle%							251.389	342.5	10						246.75	332	7					246.176	136.765	3						116.176	262.941	23					371.429	195.357	4
	236.32	394.481	1					251.389	342.5	11						247.75	331.5	8					247.647	137.059	4						116.176	262.353	24					371.071	194.286	5
	236.904	394.929	2					251.389	342.5	12						248	332.25	9					248.529	137.353	5						116.176	262.353	25					371.071	193.929	6
	237.135	394.868	3					251.389	342.5	13						248.75	331	10					249.118	138.235	6						116.176	261.765	26					371.071	193.929	7
	237.456	395.058	4					251.667	343.611	14						#%stop speckle%							250	139.412	7						115.882	260.588	27					369.643	193.929	8
	237.371	395.09	5					252.222	343.889	15						#%start speckle%							250.294	139.412	8						115.294	260.588	28					369.643	193.929	9
	237.649	395.01	6					251.667	343.889	16						254.75	338.75	1					251.176	138.824	9						116.765	259.412	29					369.643	193.929	10
	238.799	395.02	7					251.667	343.889	17						#%stop speckle%							252.059	139.706	10						116.765	258.824	30					369.643	193.929	11
	238.689	395.029	8					251.944	343.611	18						#%start speckle%							252.353	140.294	11						117.059	258.235	31					369.643	193.929	12
	238.912	395.258	9					251.944	343.333	19						253.25	384.25	1					252.647	140.882	12						116.471	257.647	32					369.643	193.929	13
	239.166	395.825	10					251.944	343.889	20						253.75	382.75	2					253.824	140.588	13						116.176	256.176	33					368.929	193.929	14
	240.018	395.322	11					251.667	343.611	21						255.25	382.25	3					253.824	141.176	14						117.647	255.882	34					368.929	193.929	15
	240.291	395.431	12					251.944	343.611	22						256.5	382	4					254.412	140.882	15						116.471	256.176	35					368.929	193.929	16
	240.24	395.608	13					251.944	343.611	23						257.5	382.25	5					254.706	141.176	16						117.059	255	36					368.929	193.929	17
	240.5	395.032	14					251.944	343.611	24						258.5	381	6					255.294	141.765	17						116.765	254.412	37					368.929	193.929	18
	240.767	394.206	15					251.944	343.611	25						258.75	380	7					255.882	142.059	18						117.059	254.118	38					368.929	193.929	19
	241.162	394.745	16					251.944	343.611	26						260.75	380.25	8					256.176	142.353	19						117.353	253.235	39					368.929	193.929	20
	241.668	394.264	17					251.944	343.611	27						261.5	379.5	9					255.588	142.647	20						118.235	253.235	40					366.786	192.143	21
	#%stop speckle%							251.944	343.611	28						262.25	379.25	10					256.176	142.647	21						117.941	252.059	41					366.429	192.143	22
	#%start speckle%							251.944	343.611	29						263.25	378.5	11					257.353	142.353	22						118.235	252.941	42					367.857	192.143	23
	274.688	378.125	1					252.778	343.611	30						263.25	379	12					256.765	142.647	23						118.235	252.353	43					366.071	191.786	24
	275.938	377.5	2					252.778	343.611	31						263.75	378	13					257.941	142.941	24						119.412	252.059	44					366.429	191.786	25
	275.938	377.5	3					253.611	343.611	32						264.75	377.5	14					257.647	142.353	25						118.529	251.176	45					366.429	191.786	26
	275.938	377.5	4					253.611	343.611	33						264.75	376.25	15					258.824	142.941	26						118.529	248.529	46					366.429	191.786	27
	275.938	377.5	5					253.333	343.611	34						265.25	376.25	16					259.706	144.118	27						118.529	248.824	47					366.786	191.786	28
	275.938	377.5	6					253.333	343.611	35						265.75	375.25	17					259.118	143.235	28						119.412	248.824	48					366.786	191.786	29
	275.938	377.5	7					253.333	343.611	36						267.5	375.25	18					258.529	143.824	29						118.529	246.471	49					366.429	191.429	30
	275.938	377.5	8					253.333	343.611	37						268	374.75	19					258.529	144.118	30						119.412	247.059	50					366.429	191.429	31
	276.562	377.188	9					253.333	343.611	38						268.25	374.25	20					259.118	144.412	31						119.118	246.765	51					366.429	191.429	32
	276.562	377.188	10					253.333	343.611	39						269.25	374.25	21					259.118	143.529	32						120.588	245.882	52					366.429	191.429	33
	276.875	377.188	11					253.333	343.611	40						270.25	372.75	22					259.412	144.118	33						120	244.412	53					366.429	191.429	34
	276.875	377.188	12					253.333	343.611	41						271.25	372.25	23					260.294	144.118	34						120.294	243.235	54					366.429	191.429	35
	277.5	376.875	13					253.333	343.611	42						272.5	372	24					260.294	144.412	35						#%stop speckle%							366.429	191.429	36
	278.125	375.625	14					253.333	343.611	43						272.75	372	25					258.824	144.412	36						#%start speckle%							366.429	191.429	37
	278.125	375.625	15					253.333	343.611	44						272.25	372.25	26					261.176	145.588	37						188.235	383.235	1					366.429	191.429	38
	279.375	375.625	16					253.056	343.611	45						272.5	372.25	27					261.471	145.588	38						187.353	381.471	2					366.429	191.429	39
	279.375	375.625	17					252.5	343.611	46						274.5	371.5	28					261.176	144.412	39						187.059	380	3					366.071	191.429	40
	280	375.625	18					252.778	343.611	47						275	369.5	29					261.471	145	40						187.941	379.706	4					366.071	191.429	41
	280	375.625	19					253.333	343.611	48						277	367.75	30					259.412	145.882	41						187.941	378.824	5					366.071	191.429	42
	280	375.625	20					253.056	343.611	49						277.75	368	31					258.824	146.176	42						188.235	376.176	6					366.071	191.429	43
	280	375.625	21					#%stop speckle%								277.75	368	32					259.412	147.059	43						188.529	375.294	7					366.429	190	44
	280.625	375.938	22					#%start speckle%								278.25	367.5	33					259.412	147.647	44						188.235	375.882	8					365.714	190	45
	280.625	375.938	23					266.389	310.278	1						279	367.25	34					259.412	146.765	45						188.235	374.118	9					365.714	190	46
	280.625	375.938	24					#%stop speckle%								279.25	366.75	35					258.824	147.647	46						188.529	373.235	10					365.714	190	47
	280.625	375.938	25					#%start speckle%								280	366.5	36					259.412	147.941	47						188.235	372.059	11					365.714	190	48
	280.938	375.625	26					247.222	320.556	1						281.5	364.75	37					259.118	148.529	48						188.235	371.176	12					365.714	190	49
	280.938	375.625	27					246.944	321.111	2						281.25	364.25	38					259.118	149.706	49						188.824	369.706	13					365.714	190	50
	281.25	375.625	28					246.944	321.111	3						282.25	364.25	39					259.412	150	50						188.235	369.118	14					365.714	190	51
	281.25	375.625	29					246.944	321.111	4						282.5	363.5	40					259.706	150	51						187.941	368.235	15					365.714	190	52
	281.25	375.625	30					247.222	321.389	5						283.25	363	41					258.529	150	52						187.941	366.765	16					365.714	190	53
	282.188	375.625	31					247.222	321.111	6						283.5	363.5	42					260	150.588	53						187.941	365.294	17					365.714	190	54
	282.188	375.625	32					247.222	321.111	7						284	363	43					260.294	150	54						188.529	365.294	18					#%stop speckle%
	282.188	377.188	33					248.056	321.111	8						285	362.75	44					#%stop speckle%								188.235	365	19					#%start speckle%
	282.188	375.312	34					248.333	321.944	9						285.75	362	45					#%start speckle%								189.118	364.118	20					293.667	312.333	1
	282.812	374.062	35					248.333	321.944	10						285.5	362	46					283.846	223.462	1						188.529	362.941	21					292.667	311.667	2
	284.062	376.875	36					248.333	321.944	11						287	361.25	47					285	225	2						189.118	362.059	22					292.333	310.667	3
	282.812	372.812	37					248.333	321.944	12						287	361.25	48					285.769	223.462	3						187.647	361.176	23					292	310.667	4
	282.812	372.812	38					248.333	321.944	13						288.5	361.25	49					283.846	225	4						187.941	360.882	24					292	309.667	5
	284.375	374.375	39					248.333	321.944	14						288.25	361.75	50					285.385	223.462	5						187.353	359.706	25					292	309.667	6
	284.375	374.375	40					248.333	321.944	15						288.5	361	51					285	222.692	6						187.941	358.235	26					292	309.667	7
	#%stop speckle%							248.333	321.944	16						#%stop speckle%							284.615	224.231	7						188.235	357.647	27					291.333	309.333	8
	#%start speckle%							248.889	322.222	17						#%start speckle%							285.385	223.077	8						189.412	357.647	28					291.333	309.333	9
	271.922	445.714	1					248.889	322.222	18						332.406	451.298	1					283.462	225.385	9						190	356.471	29					290.333	308.667	10
	272.759	445.734	2					248.889	322.222	19						332.143	450.714	2					284.231	225.769	10						188.529	355.588	30					290.333	307.333	11
	272.514	445.5	3					248.889	322.222	20						332.5	449.643	3					284.231	225	11						187.353	355.588	31					290	306.667	12
	273.061	444.954	4					248.889	322.222	21						333.214	449.286	4					283.462	225.385	12						188.235	354.412	32					290	306.667	13
	273.321	444.735	5					248.889	322.222	22						333.571	448.571	5					285	226.154	13						189.118	352.941	33					289.667	306	14
	273.344	444.539	6					248.889	322.222	23						333.929	447.5	6					284.231	225.385	14						187.941	352.647	34					290.333	304	15
	273.548	444.457	7					248.889	322.222	24						335.357	446.786	7					284.231	225.385	15						188.235	351.471	35					290.333	303.667	16
	274.237	444.359	8					248.889	322.222	25						336.429	446.786	8					284.231	226.538	16						188.824	350.588	36					289.667	302.333	17
	274.298	443.487	9					249.444	322.5	26						336.071	445	9					283.846	225.385	17						189.118	350.588	37					289.667	302.333	18
	275.197	444.471	10					249.444	322.5	27						337.143	443.929	10					285	224.231	18						190	350	38					289.667	301.333	19
	275.178	444.132	11					249.444	322.5	28						338.929	443.214	11					285	224.231	19						189.412	349.412	39					289.667	301.333	20
	275.255	443.719	12					249.444	322.5	29						338.214	441.786	12					285	223.462	20						189.412	348.529	40					289	301	21
	275.001	444.087	13					249.444	322.5	30						337.857	440.714	13					284.231	223.077	21						188.529	348.235	41					#%stop speckle%
	275.775	443.754	14					250	322.778	31						338.571	441.071	14					286.538	223.846	22						188.529	348.529	42					#%start speckle%
	276.556	443.445	15					250	322.778	32						338.929	438.571	15					285.769	224.231	23						189.118	347.353	43					406.429	174.643	1
	276.637	443.61	16					250	322.778	33						340	436.071	16					285	223.077	24						189.412	346.471	44					404.643	174.286	2
	276.511	443.28	17					250	322.778	34						340.357	434.643	17					284.615	226.154	25						187.059	345	45					405.714	175.357	3
	277.088	443.439	18					250	322.778	35						341.071	435.357	18					284.615	225.769	26						190	345.588	46					405.714	175.357	4
	277.293	442.615	19					250	322.778	36						340	433.571	19					283.077	225.385	27						188.529	344.412	47					405.357	175.357	5
	277.521	443.03	20					250	323.056	37						339.643	433.929	20					283.077	225	28						188.824	343.824	48					405.357	175.357	6
	277.659	443.26	21					250	323.056	38						339.643	433.214	21					283.077	221.923	29						188.529	342.353	49					405	175.357	7
	278.379	442.522	22					250.278	323.056	39						341.786	431.786	22					280.385	225	30						188.529	341.765	50					403.571	175.357	8
	278.388	442.852	23					250.278	323.056	40						341.429	430.714	23					278.077	221.154	31						188.529	340.882	51					404.286	175.357	9
	279.477	441.645	24					250.278	323.056	41						342.5	430.714	24					277.308	222.308	32						188.824	340	52					403.214	174.286	10
	279.872	442.667	25					250.278	323.056	42						341.429	429.286	25					278.462	224.615	33						189.118	340.294	53					402.5	174.286	11
	279.346	442.125	26					250.278	323.056	43						342.857	428.929	26					#%stop speckle%								189.706	339.118	54					402.857	174.643	12
	280.351	442.099	27					250.278	323.056	44						343.214	428.571	27					#%start speckle%								#%stop speckle%							402.143	174.286	13
	280.886	440.58	28					251.111	323.056	45						342.857	426.429	28					272.667	248.667	1						#%start speckle%							401.429	173.929	14
	281.034	440.624	29					251.111	323.056	46						343.929	426.071	29					274	249	2						316.471	368.529	1					401.429	173.571	15
	281.109	440.392	30					251.111	323.056	47						344.286	425	30					272.333	248.333	3						315.882	367.059	2					401.429	173.571	16
	280.248	440.992	31					251.111	323.056	48						344.643	425	31					274.667	248	4						315.294	367.059	3					401.429	173.571	17
	279.535	439.311	32					251.111	323.056	49						345	422.143	32					274.333	248.333	5						314.118	364.412	4					401.071	172.857	18
	#%stop speckle%							251.111	323.056	50						345.714	422.857	33					273.667	248.333	6						313.529	363.235	5					401.071	173.214	19
	#%start speckle%							251.111	323.056	51						#%stop speckle%							274	247	7						314.118	361.765	6					#%stop speckle%
	244.513	444.232	1					251.111	323.056	52						#%start speckle%							273.667	248.333	8						313.529	361.765	7					#%start speckle%
	244.956	444.566	2					251.667	323.889	53						253.25	227.5	1					274.333	247.333	9						311.765	359.706	8					132	244	1
	245.713	443.961	3					251.667	323.333	54						#%stop speckle%							275	248	10						311.176	357.941	9					132.333	244.333	2
	245.896	444.529	4					251.667	323.333	55						#%start speckle%							274.333	247.667	11						310.294	356.765	10					132.333	244	3
	245.995	443.86	5					251.667	323.333	56						230.25	113.25	1					273.333	247	12						310.588	356.176	11					132.333	244	4
	246.018	443.764	6					251.667	323.333	57						231.25	114.25	2					273.333	247.333	13						310	355	12					132.333	244	5
	246.305	443.368	7					251.944	324.167	58						232.25	114.5	3					274	246.667	14						309.118	354.412	13					131	243	6
	246.759	443.481	8					251.944	324.167	59						233.75	115.75	4					272.667	247	15						308.824	355	14					131	243	7
	247.495	443.492	9					251.944	324.167	60						234.25	115.75	5					272	245.333	16						308.529	352.941	15					131	243	8
	#%stop speckle%							251.944	324.167	61						235.75	115.5	6					272.333	244.333	17						307.941	351.765	16					131	243	9
	#%start speckle%							251.944	324.167	62						237.5	117.5	7					272	243.667	18						307.941	351.176	17					131	243	10
	246.43	321.945	1					252.778	324.444	63						239.25	118.5	8					271.333	244.667	19						307.353	350.294	18					131	243	11
	246.721	322.169	2					252.778	323.889	64						240	118	9					270.667	244	20						306.765	349.412	19					131	243	12
	246.78	322.166	3					252.778	325	65						240.25	118.25	10					270.667	244	21						307.059	349.706	20					131	243	13
	247.772	321.779	4					252.778	324.444	66						241.5	119.5	11					269.667	243	22						307.059	347.059	21					131	243	14
	248.198	322.087	5					252.778	324.444	67						242	120.75	12					270.667	243	23						307.059	346.471	22					129.667	240.667	15
	248.278	321.612	6					252.778	324.167	68						243	119.75	13					270.333	242.667	24						#%stop speckle%							129.667	240.667	16
	248.046	321.616	7					252.778	324.167	69						244.25	120.75	14					268.667	243	25						#%start speckle%							130	240.667	17
	248.744	321.955	8					252.778	324.167	70						244.5	121	15					268	242	26						312.059	272.647	1					130	240.667	18
	248.984	322.247	9					252.778	324.167	71						246	121.75	16					#%stop speckle%								310.588	272.059	2					130	240.667	19
	249.655	322.2	10					#%stop speckle%								247.75	122.5	17					#%start speckle%								310.882	272.059	3					130	240.667	20
	249.587	322.44	11					#%start speckle%								248.25	122.25	18					272.236	134.685	1						#%stop speckle%							130	240.667	21
	249.751	322.618	12					261.042	334.167	1						248.5	123.25	19					271	136.333	2						#%start speckle%							130	240.667	22
	250.979	322.726	13					261.042	334.792	2						249.25	123.5	20					273	135.333	3						243.235	376.765	1					130	240.667	23
	250.268	321.842	14					261.25	334.583	3						250	124.25	21					272.667	135.667	4						#%stop speckle%							130	240.667	24
	250.941	321.956	15					#%stop speckle%								252	125	22					273.333	135.333	5						#%start speckle%							130	240.667	25
	251.926	322.243	16					#%start speckle%								252.5	123.75	23					274	136.333	6						265.882	299.706	1					129.333	240	26
	252.18	322.237	17					266.579	320	1						253.75	124.25	24					274	135.667	7						265.294	297.941	2					129.333	240.333	27
	252.372	322.767	18					266.842	320	2						255	125	25					275.667	136	8						265.294	296.765	3					129.333	240.333	28
	252.944	322.599	19					266.842	320	3						256	124.75	26					276	135.333	9						264.706	296.176	4					129.333	240.333	29
	253.707	322.514	20					266.842	320	4						256.5	125.25	27					276.333	136	10						264.412	295.588	5					129	239.333	30
	253.617	322.458	21					#%stop speckle%								257.25	125.5	28					275.667	136	11						264.412	294.118	6					129	239.667	31
	254.378	322.858	22					#%start speckle%								257.5	126	29					276.333	135	12						264.118	293.235	7					129	239.667	32
	254.534	322.695	23					247.368	452.105	1						258.75	126.25	30					273.667	134.333	13						264.118	292.647	8					129	239.667	33
	254.685	322.996	24					248.684	452.368	2						259	126.75	31					274.333	134.667	14						264.706	292.941	9					129	239.667	34
	254.668	322.831	25					248.684	452.368	3						259.75	126.75	32					278	134	15						265.588	292.647	10					129	239.667	35
	254.972	322.627	26					248.684	452.368	4						261.25	126.75	33					278.667	134	16						265.294	292.353	11					129	239.667	36
	255.473	322.441	27					248.421	452.105	5						263.25	127.25	34					279.333	133.333	17						264.706	290.588	12					129	239.667	37
	255.934	322.723	28					249.211	451.842	6						264.25	127.75	35					278.667	133.667	18						264.118	289.412	13					129	239.667	38
	256.622	322.849	29					#%stop speckle%								264.5	128.25	36					278.333	133.333	19						263.824	288.824	14					128.667	240	39
	256.019	323.743	30					#%start speckle%								265.5	128.5	37					279	135	20						265	287.059	15					128.667	240	40
	257.006	323.941	31					278.158	167.368	1						266	128.25	38					279.333	135.333	21						264.706	287.647	16					128.667	240	41
	257.152	324.088	32					279.737	166.579	2						266.5	128.75	39					278	135.333	22						264.118	286.471	17					128.667	240	42
	257.838	324.031	33					280	167.632	3						267.25	128.75	40					277.333	135.667	23						262.941	285.588	18					128.667	240	43
	258.481	324.051	34					280	167.105	4						268.25	129.5	41					278.667	134.667	24						263.235	285.294	19					128.333	240.333	44
	258.901	323.957	35					280	167.105	5						269	129.75	42					278.667	136.333	25						262.059	285	20					128.333	240.333	45
	259.323	324.198	36					279.737	167.105	6						270	130.75	43					277.667	137	26						#%stop speckle%							128.333	240.333	46
	259.797	324.298	37					280.263	167.105	7						271	131	44					279	137	27						#%start speckle%							128	240.333	47
	260.043	324.528	38					280.526	167.632	8						272	131.25	45					278.667	136.333	28						288.529	285.294	1					128	240.333	48
	259.97	324.746	39					280.526	168.158	9						273	131.5	46					279.333	137.667	29						287.353	285.882	2					128	239	49
	260.115	324.728	40					281.316	168.684	10						273.75	132.25	47					277.333	136.333	30						287.941	283.235	3					128.333	239	50
	261.04	324.674	41					281.316	168.684	11						275	132.75	48					277.333	137.333	31						287.941	282.059	4					128.333	238.333	51
	261.241	324.312	42					281.316	168.947	12						275	132.75	49					277.333	138	32						287.941	279.706	5					128.333	238	52
	261.203	324.056	43					281.053	169.211	13						275.75	133.25	50					276.333	138.667	33						287.647	279.412	6					128	238	53
	#%stop speckle%							281.316	168.947	14						276.75	133.75	51					277.667	138.333	34						287.941	279.706	7					128.667	237.333	54
	#%start speckle%							281.842	168.947	15						276.75	133.75	52					277	140	35						#%stop speckle%							#%stop speckle%
	308.926	165.817	1					282.105	168.947	16						277.75	133.75	53					277	141	36						#%start speckle%							#%start speckle%
	310	166.5	2					282.105	168.947	17						278.5	134.25	54					276.667	142.667	37						275.833	213.75	1					387	256	1
	310.25	166.75	3					282.895	169.474	18						#%stop speckle%							276	142.667	38						275.417	212.917	2					385.333	257.667	2
	311	167.5	4					282.632	169.474	19						#%start speckle%							277.333	141.333	39						277.5	212.083	3					385.333	257.667	3
	311	167.5	5					282.895	170	20						237.632	173.648	1					#%stop speckle%								275	212.5	4					384.333	257.667	4
	311.25	167.5	6					283.421	170.526	21						236.818	174.091	2					#%start speckle%								#%stop speckle%							384.333	257.333	5
	311.75	168.25	7					284.474	170.526	22						239.091	175	3					344.046	64.7223	1						#%start speckle%							384.333	257.333	6
	311.75	168.366	8					284.474	170.263	23						240.455	175.455	4					343.333	65	2						177.059	368.529	1					384.333	257.333	7
	312.429	168.925	9					284.474	170.263	24						243.182	175	5					345	65.3333	3						176.471	367.647	2					384	257	8
	313	169.75	10					285.263	170.526	25						243.182	174.091	6					343.667	64.6667	4						176.176	366.176	3					383.333	256.333	9
	312.25	170.75	11					284.474	170.526	26						244.091	175.909	7					344.667	63.6667	5						176.765	366.176	4					383	254.667	10
	313	171.25	12					285	170.526	27						245	176.364	8					344.667	64.3333	6						176.765	364.412	5					382.667	254.667	11
	313.75	171.75	13					285	171.316	28						246.364	176.364	9					346	63.6667	7						175.588	363.235	6					382	253.667	12
	314	172	14					285	171.053	29						246.818	177.273	10					345.333	63.6667	8						177.353	362.941	7					382	253.667	13
	314.5	173.25	15					284.737	171.053	30						247.727	177.273	11					344	63	9						176.765	362.059	8					381.333	253.333	14
	314.5	174.25	16					285	171.316	31						249.545	176.818	12					345.667	62.3333	10						176.471	360.588	9					381.667	252.333	15
	314.5	174.25	17					286.579	171.316	32						250	177.727	13					345.667	62.3333	11						176.176	359.412	10					381.667	252.333	16
	314.5	175	18					286.316	171.842	33						250.455	177.727	14					347.333	62	12						177.059	359.118	11					381.667	252.333	17
	314.75	175.5	19					286.316	171.842	34						252.727	177.727	15					347.333	62	13						#%stop speckle%							381.667	252.333	18
	315	175.5	20					286.316	171.842	35						253.182	178.636	16					348	61.3333	14						#%start speckle%							381.333	252.333	19
	315.5	175.75	21					286.579	172.105	36						253.636	178.182	17					346.667	59.3333	15						285.882	352.353	1					381	252.333	20
	315.5	175.75	22					286.053	171.579	37						255.909	178.636	18					347.333	57.3333	16						285.588	351.176	2					381	252.333	21
	315.5	175.75	23					286.842	171.579	38						257.273	178.636	19					348	58	17						285.588	351.471	3					380.333	251.667	22
	317	176.25	24					286.842	171.579	39						258.182	177.727	20					349	56.6667	18						#%stop speckle%							379.667	251	23
	317	176	25					286.842	171.842	40						258.636	179.091	21					349.333	57	19						#%start speckle%							380	249	24
	317.75	176.25	26					287.105	172.368	41						261.818	178.636	22					349	56.3333	20						161.765	395.882	1					378.667	249	25
	317.5	176.25	27					287.632	172.105	42						261.364	179.091	23					349.333	54.6667	21						161.471	395.882	2					379.667	248.667	26
	318	177	28					287.105	172.105	43						261.818	179.091	24					348.667	54	22						#%stop speckle%							379.667	248.667	27
	319	177.5	29					288.158	171.842	44						263.182	179.545	25					348.667	53	23						#%start speckle%							#%stop speckle%
	318.5	178.25	30					288.684	172.368	45						263.636	180	26					349.333	52	24						384.412	197.941	1					#%start speckle%
	318.75	179.25	31					288.947	172.368	46						264.545	179.545	27					349.667	52	25						383.529	198.235	2					136	265.667	1
	318.75	178	32					289.211	172.632	47						266.364	180.455	28					350.667	50	26						382.647	197.059	3					#%stop speckle%
	319.5	179.25	33					288.947	172.632	48						266.818	181.818	29					351	49	27						382.647	197.059	4					#%start speckle%
	320.25	179	34					289.737	172.368	49						266.364	180	30					351.333	47.6667	28						382.647	197.059	5					202.333	230	1
	#%stop speckle%							289.737	172.632	50						268.636	180	31					351.667	46.6667	29						381.471	196.765	6					201.667	230	2
	#%start speckle%							290	172.895	51						270	180.909	32					350.333	46	30						380.294	195.294	7					201.667	230	3
	245.25	396	1					289.737	172.895	52						269.545	181.818	33					352.333	46	31						380.294	195.588	8					#%stop speckle%
	246.25	396	2					289.737	173.158	53						271.818	181.364	34					#%stop speckle%								379.706	194.412	9					#%start speckle%
	246.5	396.25	3					290.263	172.368	54						#%stop speckle%							#%start speckle%								378.529	193.824	10					293.571	244.286	1
	246.5	396.25	4					291.053	172.895	55						#%start speckle%							232	185.667	1						378.529	193.235	11					293.571	242.5	2
	247	396.25	5					290.789	173.158	56						236.5	221.25	1					233.333	186	2						378.235	193.529	12					#%stop speckle%
	247	396.25	6					291.053	172.895	57						237.75	222.25	2					233	185.667	3						377.059	192.353	13					#%start speckle%
	248.25	396.5	7					290.789	173.947	58						237.5	222.5	3					232.667	185.333	4						377.059	192.647	14					369.667	286.333	1
	248	396.75	8					290.789	173.947	59						237.5	222.5	4					233.333	186	5						377.059	192.647	15					369	285.667	2
	248.25	397	9					#%stop speckle%								238.75	222.5	5					235.333	184.667	6						375.294	191.471	16					368.667	285.667	3
	248.75	397	10					#%start speckle%								240	222.75	6					235	184.667	7						375	191.176	17					368.333	285.333	4
	248.75	397	11					275	263.611	1						242.25	222.75	7					235	184.667	8						#%stop speckle%							368.333	285.333	5
	249	397	12					275	263.611	2						243	222.75	8					238.333	182.333	9						#%start speckle%							367.333	285	6
	249.25	397	13					275	263.611	3						244	223.25	9					240	183.667	10						370	292.353	1					367	284.333	7
	249.25	397	14					275	263.611	4						245	222.75	10					240.667	183.667	11						370	292.353	2					367	284	8
	250.25	396.25	15					275	263.611	5						246	223.25	11					240.333	183	12						368.529	290.882	3					366.333	284	9
	250.25	395.75	16					275	263.611	6						247	224.75	12					241.667	184.667	13						368.235	290.294	4					367	284	10
	251	395.75	17					275	263.611	7						248.25	225	13					242.333	184	14						368.235	290	5					366.667	283.333	11
	250.75	395.5	18					275.278	265.278	8						249.5	225.5	14					241	184.667	15						367.353	289.118	6					366.667	283.333	12
	251.25	395.5	19					274.722	264.167	9						250	225.5	15					241	184.667	16						366.765	287.941	7					366.333	283.333	13
	252.25	395.75	20					274.722	264.722	10						250.75	224.75	16					241.333	184.333	17						366.176	287.353	8					366.333	283.333	14
	252.25	395.75	21					274.722	264.722	11						251.5	225.25	17					242.333	184	18						367.647	286.471	9					366.333	283.333	15
	253.25	395.75	22					274.444	263.889	12						252.75	225.5	18					244	183.333	19						366.471	286.176	10					366.333	283	16
	253.25	395.75	23					#%stop speckle%								253.5	224.75	19					243.333	183	20						365.882	285.294	11					365.667	281.333	17
	253.25	395.75	24					#%start speckle%								255.5	225.5	20					245.667	183.667	21						365.588	285.588	12					365.667	281.333	18
	253.25	395.75	25					294.167	181.944	1						256	225.25	21					245.667	183.667	22						364.706	282.647	13					365.667	281.333	19
	253.25	395.75	26					293.889	181.944	2						258	226	22					246.667	184	23						364.706	283.824	14					365.333	281	20
	254.25	396	27					293.889	181.944	3						258	225.25	23					246.667	184	24						365.588	282.941	15					365.333	281	21
	254.25	396	28					293.889	181.944	4						259	225.75	24					246.667	184	25						365.588	282.941	16					364.333	280	22
	254.5	395.75	29					294.167	182.5	5						260	226	25					247.333	184.667	26						364.706	282.059	17					364.667	280	23
	254.75	395.5	30					295	182.222	6						261.25	226.75	26					247.333	184.667	27						363.235	280.588	18					364.667	280	24
	254.75	395.5	31					295	182.222	7						261.5	226.25	27					247	184.667	28						362.647	280	19					364.667	280	25
	255.25	395.5	32					295	182.222	8						#%stop speckle%							248.667	185.667	29						362.647	279.118	20					364.333	279.667	26
	256	395.5	33					296.389	182.222	9						#%start speckle%							250.667	185	30						361.471	277.353	21					364	279.333	27
	256	395.5	34					296.389	182.222	10						319.5	451.25	1					251.333	184.333	31						#%stop speckle%							363.667	279	28
	256	395.5	35					296.944	182.222	11						319.5	450.5	2					251	185	32						#%start speckle%							363.667	279	29
	256	395.5	36					296.944	182.222	12						320	450.25	3					251.333	183	33						133.824	317.647	1					362.667	278.667	30
	255.75	395.5	37					296.944	182.222	13						#%stop speckle%							249.667	183.667	34						135	317.941	2					363	278.667	31
	257	395.75	38					297.222	182.5	14						#%start speckle%							252.667	184.667	35						133.529	317.059	3					363	278.667	32
	257	396	39					297.222	182.5	15						262.727	158.636	1					251.333	183.667	36						133.824	318.235	4					363.333	278.333	33
	257.5	396	40					297.222	183.056	16						264.091	159.545	2					252	184.333	37						134.118	317.647	5					363.333	278.333	34
	257.75	396.25	41					297.222	183.056	17						267.273	160.455	3					253	183.333	38						134.706	318.529	6					363.333	278	35
	257.5	396.25	42					297.222	183.056	18						268.182	162.273	4					254.667	182.667	39						#%stop speckle%							363.333	278	36
	257.5	396.25	43					297.222	183.056	19						269.091	160.455	5					253.667	182.333	40						#%start speckle%							363.333	278	37
	259.25	395.75	44					297.222	183.056	20						270	161.818	6					253.667	184	41						120.588	324.118	1					363.333	278	38
	259.5	395.5	45					297.5	183.056	21						270	162.25	7					254.333	183.333	42						120.588	323.529	2					363.333	278	39
	259.5	395.5	46					297.5	183.056	22						271.75	162.75	8					253.333	184	43						120.294	323.235	3					363.333	278	40
	259.5	395.5	47					298.333	183.333	23						273.25	163.75	9					252.667	183	44						120.294	321.765	4					363.333	278	41
	259.25	395.75	48					298.333	183.333	24						274	164.25	10					253	183	45						120.882	321.471	5					363.333	278	42
	260.75	395	49					298.333	183.333	25						274.5	164.75	11					254.333	182.333	46						120	320.588	6					363.333	278	43
	261	395	50					298.333	183.333	26						276	164.75	12					254.333	184	47						121.176	319.412	7					363.333	278	44
	261.25	395.5	51					298.333	183.333	27						276	165.25	13					253.667	183.333	48						120.882	318.529	8					363.333	278	45
	261.75	394	52					298.333	184.167	28						275.75	165.25	14					253.667	182.333	49						120.882	317.353	9					363.333	278	46
	#%stop speckle%							298.333	184.167	29						277.543	165.506	15					254.667	182.333	50						121.176	316.765	10					363.333	278	47
	#%start speckle%							298.333	184.167	30						277.25	165.5	16					255.667	182.333	51						120.588	314.706	11					363.333	278	48
	245.25	327	1					299.444	184.167	31						276.75	165	17					255.333	182	52						121.176	314.706	12					363	278.333	49
	245.75	327	2					299.444	184.167	32						277.75	166.25	18					#%stop speckle%								120.882	313.529	13					363	278.333	50
	246.75	327.25	3					299.444	184.167	33						278.5	166	19					#%start speckle%								121.471	312.941	14					363	278.333	51
	247	327.25	4					299.444	184.167	34						276	165.25	20					239.412	157.059	1						121.176	312.647	15					363	278.333	52
	247.5	328.25	5					299.444	184.167	35						278.25	165.5	21					239.412	158.235	2						120.882	311.471	16					362.667	278.333	53
	247.5	327.25	6					299.444	184.167	36						278	165.75	22					240.882	159.118	3						121.176	311.176	17					362.333	278.667	54
	248	328	7					299.444	184.167	37						277.5	166.5	23					240.882	160	4						121.176	309.706	18					#%stop speckle%
	247.75	328	8					299.444	184.167	38						#%stop speckle%							241.471	159.706	5						121.176	308.824	19					#%start speckle%
	248.25	328.25	9					299.444	184.167	39						#%start speckle%							241.471	159.706	6						122.059	309.118	20					400.714	186.786	1
	249	328.25	10					299.444	184.167	40						290.713	55.048	1					242.059	159.706	7						122.059	307.647	21					#%stop speckle%
	248.75	327.5	11					299.444	184.167	41						291.53	56.1112	2					243.529	159.706	8						122.059	306.765	22					#%start speckle%
	249.5	327.5	12					299.444	184.167	42						292.602	56.3888	3					243.824	159.706	9						122.647	305.588	23					370.909	208.636	1
	250	327.75	13					299.444	184.167	43						293.456	56.7545	4					243.529	159.412	10						122.647	305	24					370.909	209.091	2
	250.5	327.5	14					299.722	184.167	44						#%stop speckle%							245.294	159.412	11						122.647	304.412	25					369.545	208.182	3
	250.25	327.25	15					299.722	184.167	45						#%start speckle%							246.471	160.294	12						122.647	303.824	26					369.545	208.182	4
	251.25	327.25	16					299.722	184.167	46						241.25	350.75	1					246.765	160.588	13						122.941	304.412	27					369.091	207.273	5
	251.5	327.75	17					300.556	184.167	47						241	350.75	2					247.647	160.882	14						122.941	303.529	28					369.091	207.273	6
	251.5	328	18					300.556	184.167	48						241.5	351	3					247.059	162.059	15						122.941	303.235	29					369.091	207.273	7
	#%stop speckle%							300.556	184.167	49						243.25	350.25	4					248.235	162.941	16						123.235	302.647	30					369.091	207.273	8
	#%start speckle%							300.556	184.167	50						244.25	349.5	5					248.529	162.059	17						123.235	302.059	31					369.091	207.273	9
	262.017	325.862	1					300.556	184.722	51						244.75	349.5	6					248.529	162.647	18						124.118	302.059	32					369.091	207.273	10
	262.086	326.054	2					299.167	184.444	52						245.75	349	7					249.118	162.941	19						123.824	301.471	33					367.727	205.909	11
	263.106	327.09	3					299.444	184.444	53						247	349	8					248.824	162.941	20						123.824	300	34					367.727	205.909	12
	#%stop speckle%							299.444	184.444	54						246.75	349	9					249.118	162.647	21						123.824	300	35					367.727	205.909	13
	#%start speckle%							299.444	184.444	55						248.75	349	10					251.176	163.235	22						123.824	299.706	36					367.727	205.909	14
	332.188	137.5	1					300.278	184.722	56						249.25	348.25	11					252.647	163.824	23						123.235	298.235	37					366.364	205.909	15
	331.562	138.75	2					298.611	184.722	57						249.5	348.25	12					250.294	163.824	24						123.824	297.353	38					365.909	205.455	16
	332.188	140	3					298.611	184.722	58						250.75	348.25	13					250.294	163.235	25						123.529	297.059	39					365.909	205.455	17
	331.875	140.625	4					298.611	184.722	59						251.75	347.25	14					250.294	164.118	26						123.529	297.059	40					365.909	205.455	18
	332.5	139.062	5					298.611	184.722	60						253.25	346.75	15					251.765	165.294	27						123.824	296.471	41					364.545	205	19
	334.062	139.062	6					298.611	184.722	61						254	346	16					251.765	164.118	28						124.706	295.294	42					364.545	205	20
	334.062	139.062	7					298.611	184.722	62						254.5	346.25	17					251.765	164.118	29						124.706	294.118	43					364.545	205	21
	334.062	139.062	8					298.889	183.611	63						254.75	346.25	18					251.176	164.118	30						124.118	293.824	44					364.545	205	22
	335	139.688	9					298.889	183.611	64						255.75	346	19					252.059	164.412	31						124.706	292.941	45					364.545	205	23
	335	139.688	10					298.889	184.722	65						256	345.5	20					252.353	164.412	32						124.412	293.529	46					363.182	204.091	24
	335.938	140.312	11					298.889	184.722	66						257	344	21					252.059	164.706	33						124.706	293.824	47					363.182	204.091	25
	335.938	140.312	12					298.889	183.611	67						258	344.75	22					251.765	165.588	34						125.294	293.529	48					363.182	204.091	26
	336.562	140.312	13					298.056	184.444	68						258	344.75	23					252.941	165.294	35						124.412	291.471	49					363.636	204.091	27
	336.562	140.312	14					298.056	184.444	69						258.5	344.75	24					252.059	165	36						125.882	291.176	50					363.636	203.636	28
	336.875	140.312	15					298.611	183.611	70						259.75	344	25					#%stop speckle%								126.471	291.176	51					361.818	203.636	29
	338.125	141.562	16					298.611	183.611	71						260.25	343	26					#%start speckle%								125.588	290.294	52					363.182	204.091	30
	339.375	142.188	17					#%stop speckle%								260.75	343.25	27					267	152.667	1						125.588	290.882	53					363.182	203.636	31
	339.375	142.188	18					#%start speckle%								261	343	28					267.667	153	2						127.059	288.824	54					360.909	203.636	32
	339.688	142.812	19					246.053	406.053	1						262	342.5	29					268.333	154	3						#%stop speckle%							360.909	203.636	33
	339.688	142.812	20					246.053	406.579	2						262.25	341.75	30					268.667	154.667	4						#%start speckle%							360.455	202.727	34
	339.688	142.812	21					246.053	406.579	3						262.75	341.25	31					269	154	5						328.529	243.824	1					360.455	202.727	35
	341.25	143.438	22					246.316	406.316	4						#%stop speckle%							269.667	154.667	6						328.529	245.294	2					360.455	202.727	36
	341.25	143.438	23					246.316	406.316	5						#%start speckle%							269.333	154.667	7						#%stop speckle%							360.455	202.727	37
	341.25	143.438	24					246.316	406.316	6						263.929	107.857	1					269	154.333	8						#%start speckle%							360.455	202.727	38
	340.625	144.688	25					246.316	406.316	7						266.786	108.929	2					269.667	154.333	9						304.412	362.941	1					360.455	202.727	39
	340.625	144.062	26					246.316	406.316	8						266.786	108.929	3					269.667	156.333	10						305.294	361.176	2					360.455	202.727	40
	341.25	145.938	27					246.316	406.316	9						266.786	108.929	4					270.333	156.333	11						305.882	360.882	3					359.091	202.273	41
	342.812	146.875	28					246.053	406.053	10						267.5	110.357	5					270.333	156.333	12						305.294	360	4					359.091	202.273	42
	343.75	147.5	29					246.053	406.053	11						268.571	110.714	6					271	155.667	13						305.294	359.706	5					358.636	201.818	43
	342.812	147.188	30					246.316	405.789	12						270.357	110.357	7					271.667	155.333	14						304.118	356.471	6					358.636	201.818	44
	343.125	147.188	31					246.842	406.053	13						271.429	112.857	8					272.333	155.333	15						304.118	355.882	7					358.636	201.818	45
	344.062	148.438	32					246.842	406.053	14						271.786	113.214	9					271.667	154.667	16						302.647	353.529	8					358.636	201.818	46
	344.062	148.438	33					246.316	405.789	15						272.857	112.857	10					272.333	155.667	17						302.059	352.059	9					358.636	201.818	47
	344.688	149.062	34					247.105	405.789	16						273.571	113.571	11					272	155	18						301.765	352.941	10					358.636	201.818	48
	344.688	148.125	35					247.105	405.789	17						275.714	114.286	12					272.667	155.667	19						301.765	352.059	11					358.636	201.818	49
	345.625	148.125	36					247.105	405.789	18						276.429	113.929	13					272.333	155.333	20						301.765	350.882	12					358.636	201.818	50
	346.562	149.062	37					247.105	405.789	19						277.143	114.643	14					272.333	155.333	21						300.882	348.824	13					358.636	201.818	51
	347.188	149.062	38					247.632	405.789	20						278.929	116.429	15					272.333	155.333	22						301.176	349.118	14					358.636	201.818	52
	346.562	149.062	39					247.895	405.789	21						279.643	116.429	16					272.333	155.333	23						300.882	347.059	15					358.636	201.818	53
	346.562	149.062	40					247.895	405.789	22						280.357	116.429	17					272.333	155.333	24						#%stop speckle%							355.455	200.455	54
	346.875	148.125	41					247.632	405	23						281.071	116.071	18					272.333	155.333	25						#%start speckle%							#%stop speckle%
	347.812	149.062	42					247.632	405	24						283.571	116.786	19					272.333	155.333	26						170	338.235	1					#%start speckle%
	347.812	149.062	43					248.158	404.737	25						282.5	117.5	20					272.667	155.667	27						171.471	336.765	2					121.333	237	1
	#%stop speckle%							248.158	404.737	26						284.286	117.857	21					272.667	155.667	28						170.882	336.471	3					121.333	237	2
	#%start speckle%							248.158	403.947	27						284.643	119.286	22					272.667	155.667	29						170.882	335.882	4					121.667	236.667	3
	264.952	246.975	1					248.684	404.737	28						286.071	118.571	23					272.667	155.667	30						170.294	335.588	5					121.667	236.667	4
	265.454	247.222	2					248.684	404.737	29						286.071	119.286	24					272.667	156	31						170.588	333.529	6					122.333	235.667	5
	265.539	247.342	3					248.684	404.737	30						287.5	119.643	25					271.667	156.333	32						170.588	332.647	7					121.333	233.333	6
	#%stop speckle%							#%stop speckle%								288.214	120.357	26					271.667	157	33						170.588	332.647	8					122	234.667	7
	#%start speckle%							#%start speckle%								290	120	27					272	156.667	34						170.588	331.765	9					123	235	8
	276.25	366.25	1					238.947	337.895	1						291.071	120.714	28					272	157.333	35						170.588	330.882	10					123.333	235.333	9
	#%stop speckle%							238.684	337.105	2						291.429	120.357	29					271.667	157.667	36						170	330.588	11					121.667	238	10
	#%start speckle%							238.421	338.421	3						293.571	121.071	30					271	158.333	37						170	330	12					121.333	236.667	11
	275.625	261.25	1					239.211	337.368	4						293.571	120.357	31					#%stop speckle%								170	328.235	13					120.667	234.333	12
	275.625	261.562	2					239.474	337.105	5						293.571	121.429	32					#%start speckle%								170	327.353	14					120.667	233.333	13
	275.625	261.562	3					238.684	336.842	6						294.643	122.143	33					273.529	102.941	1						170	327.353	15					121.667	234	14
	275	262.188	4					239.474	337.632	7						295.357	121.429	34					274.412	104.706	2						170.294	325.588	16					122.333	233.333	15
	277.188	262.812	5					239.474	337.632	8						296.429	122.143	35					274.412	104.706	3						170	324.706	17					122.333	233	16
	276.562	262.188	6					239.474	337.632	9						298.929	122.857	36					274.706	105	4						170	322.941	18					121	231.667	17
	276.562	262.188	7					239.474	337.368	10						298.214	123.929	37					274.706	105	5						170.588	322.353	19					121.667	231.667	18
	276.25	263.125	8					239.474	337.368	11						298.571	122.857	38					275.294	105.588	6						170.588	321.176	20					120	232	19
	#%stop speckle%							239.474	337.368	12						299.286	123.929	39					275.882	104.412	7						170.588	321.176	21					121	231.333	20
	#%start speckle%							239.474	337.368	13						299.643	123.929	40					275.588	103.824	8						170.588	320	22					121	230.667	21
	262.721	452.625	1					239.474	337.368	14						301.071	124.643	41					277.059	104.118	9						170.588	320	23					120.667	230.667	22
	262.985	451.997	2					239.474	337.368	15						301.071	124.643	42					276.765	104.412	10						170	318.824	24					121	230.667	23
	262.542	452.3	3					239.474	337.368	16						302.5	125	43					276.471	104.706	11						170.294	317.647	25					120.667	230.667	24
	263.338	452.326	4					239.474	337.368	17						301.786	126.071	44					277.059	105	12						170.588	316.176	26					119.667	229.333	25
	263.172	451.739	5					239.474	337.368	18						302.857	124.643	45					278.235	105	13						170.588	316.765	27					120	230	26
	263.7	451.478	6					239.474	337.368	19						302.5	125.714	46					278.529	105.294	14						171.471	315.588	28					119.333	229.667	27
	264.184	451.429	7					239.737	337.105	20						302.857	125.714	47					279.706	105.294	15						170.882	314.412	29					120	230.333	28
	264.582	451.358	8					239.737	337.105	21						#%stop speckle%							280.294	105.588	16						171.471	315	30					120	229.667	29
	264.878	451.116	9					240.263	337.105	22						#%start speckle%							280.882	105.294	17						170	313.529	31					120.333	230	30
	265.356	450.928	10					240.263	337.105	23						261.5	360.25	1					280.588	105.294	18						170.882	313.235	32					120	229	31
	265.912	451.034	11					240.263	337.105	24						262	359.5	2					280.294	105.588	19						170	312.353	33					120.333	228.667	32
	265.64	450.98	12					241.316	336.842	25						262.5	359.25	3					281.471	106.176	20						170.294	311.765	34					120	229	33
	265.741	450.616	13					241.316	337.368	26						263.75	359.25	4					281.471	106.765	21						169.412	310.588	35					120.333	228.667	34
	266.155	450.443	14					241.316	337.368	27						264.5	359.25	5					282.059	105.882	22						169.412	310.588	36					120	228.667	35
	266.704	450.301	15					241.316	337.368	28						265	358.5	6					281.765	106.765	23						170.588	310	37					120	228	36
	266.73	450.036	16					241.316	337.368	29						265.5	358.5	7					282.059	106.471	24						169.706	308.824	38					119.667	228.333	37
	267.316	449.732	17					241.316	337.368	30						266.5	357	8					283.235	106.765	25						170	309.118	39					120.333	227.333	38
	266.923	448.842	18					241.579	337.368	31						267.75	357	9					282.353	105.882	26						171.471	309.118	40					120.667	227.667	39
	267.738	447.834	19					241.579	337.368	32						267.75	356.5	10					282.941	105.588	27						170.882	308.824	41					121	226.667	40
	268.145	448.116	20					241.579	337.368	33						269	356.25	11					283.824	104.412	28						171.471	308.529	42					120.333	227.333	41
	268.358	447.692	21					241.579	337.368	34						270	355.5	12					283.824	103.529	29						170.882	307.353	43					121	228.333	42
	268.634	447.779	22					241.579	337.368	35						270.5	354.75	13					284.118	103.824	30						171.471	307.647	44					122	229	43
	269.378	447.838	23					241.579	337.368	36						270.25	354.75	14					284.706	104.706	31						171.471	306.765	45					122.667	229.667	44
	269.273	447.316	24					241.579	337.368	37						271.5	354.5	15					285.294	104.706	32						171.765	306.471	46					122.667	229.667	45
	269.623	447.32	25					241.579	337.368	38						272.25	354.5	16					285.294	104.118	33						171.471	305	47					122.667	231	46
	270.149	446.95	26					241.579	337.368	39						273	354.25	17					285.294	104.412	34						171.471	305	48					120.667	227.667	47
	270.308	446.088	27					241.579	337.632	40						273.5	354	18					285.588	104.412	35						171.471	304.706	49					121.667	228.333	48
	270.803	446.405	28					241.579	337.632	41						273.75	353	19					286.471	103.824	36						171.176	303.235	50					121.333	227.333	49
	271.162	445.99	29					241.579	337.632	42						275	353.75	20					287.941	104.706	37						171.176	302.353	51					121.333	227	50
	271.455	445.918	30					241.579	337.632	43						275.75	352.5	21					288.235	104.118	38						170.882	301.765	52					121.667	226	51
	271.516	445.684	31					241.316	338.158	44						275.5	351.25	22					288.235	104.118	39						171.765	300.294	53					121	226.333	52
	271.954	445.371	32					241.316	338.158	45						#%stop speckle%							288.235	104.118	40						170.882	299.706	54					122	227.667	53
	272.702	445.31	33					241.579	338.158	46						#%start speckle%							288.824	104.118	41						#%stop speckle%							122.333	226.667	54
	272.857	444.603	34					241.842	338.421	47						314.5	95.5	1					289.706	104.118	42													#%stop speckle%
	272.972	444.582	35					241.842	338.421	48						315.25	96.25	2					289.706	104.118	43													#%start speckle%
	273.428	444.422	36					241.842	338.421	49						315.75	97.5	3					290.294	104.706	44													160.588	296.176	1
	274.022	444.157	37					241.842	338.421	50						#%stop speckle%							290	104.706	45													160.588	295.882	2
	274.141	443.866	38					241.842	338.421	51						#%start speckle%							292.059	103.824	46													160.588	295.882	3
	273.672	444.057	39					241.842	338.421	52						323.75	455.75	1					291.765	104.412	47													161.765	295.588	4
	274.652	443.734	40					241.842	338.421	53						324	454	2					291.765	104.412	48													160.882	295.588	5
	275.09	443.473	41					241.842	338.421	54						324	453.5	3					291.765	104.412	49													161.176	295.882	6
	275.25	443.284	42					241.842	338.421	55						324.75	452.75	4					291.176	103.824	50													161.176	295.882	7
	275.598	443.252	43					242.105	338.947	56						324.75	452.5	5					290.588	104.412	51													161.176	295.882	8
	276.327	443.033	44					241.842	339.474	57						325	451.25	6					291.176	103.529	52													160.882	295.882	9
	276.387	442.869	45					241.842	339.474	58						325.5	450.25	7					291.471	104.118	53													160.588	295.882	10
	276.67	443.263	46					241.842	339.474	59						326.75	448.75	8					290.882	104.118	54													160.588	295.882	11
	277.918	443.532	47					241.579	339.737	60						327	448.5	9					#%stop speckle%															160.588	295.882	12
	277.977	443.179	48					241.579	339.737	61						327.75	447.75	10					#%start speckle%															160.588	295.882	13
	278.155	442.872	49					241.579	339.737	62						328.75	446.5	11					307.638	426.8	1													160	295.294	14
	278.849	442.933	50					241.579	339.737	63						329	446	12					308.333	426.333	2													160.294	295.588	15
	#%stop speckle%							241.579	339.737	64						329.25	444.5	13					309	426	3													160	295.588	16
	#%start speckle%							241.579	339.737	65						329.5	444	14					309	426	4													159.706	295.588	17
	264.824	396.021	1					241.579	339.737	66						329.75	442.5	15					310.667	425	5													160.588	295	18
	265.32	396.947	2					241.579	339.737	67						331.25	441.75	16					311	424.667	6													160.882	294.118	19
	265.211	396.86	3					241.579	339.737	68						331	439.25	17					310.667	423.333	7													160.882	294.118	20
	265.295	396.938	4					241.579	339.737	69						331	438.75	18					312.333	424	8													161.176	293.529	21
	265	397.25	5					241.316	339.737	70						332.25	437.75	19					312.667	422.667	9													161.176	293.529	22
	266.5	397.5	6					241.316	339.737	71						332.75	436	20					313.667	423.667	10													161.176	293.529	23
	266.5	397.5	7					#%stop speckle%								332.75	434.75	21					313.667	421.333	11													160.588	293.235	24
	266.5	397.5	8					#%start speckle%								333	434.5	22					315.333	420	12													160.588	293.235	25
	267.5	397	9					254.722	375	1						333.25	434	23					314.667	419.667	13													160.588	292.059	26
	267.5	397	10					254.722	375	2						333	432.5	24					316.333	419.333	14													160	292.353	27
	267.5	397	11					255.556	375.556	3						333	432	25					315.667	420.333	15													160	292.353	28
	267.5	397	12					254.444	376.389	4						333.25	431	26					316.667	419.333	16													160	292.059	29
	267.5	397	13					255.278	374.722	5						334.5	429.25	27					316.667	418.333	17													160	291.176	30
	267.5	396.25	14					255	375.278	6						334.5	428.25	28					318	418.333	18													160	291.176	31
	268.5	397.25	15					255.278	376.111	7						334.75	427.25	29					317.667	417.667	19													160	291.176	32
	268.5	397.25	16					254.444	374.722	8						335.25	426.5	30					318.333	417.333	20													160	291.176	33
	268.5	397.25	17					254.722	374.722	9						336.25	425.75	31					318.333	415.667	21													160	291.176	34
	269	397	18					255.833	375.278	10						336.25	424.5	32					318	414.667	22													160	291.176	35
	269.75	397	19					256.667	375	11						337	424	33					#%stop speckle%															160	291.176	36
	269.75	396.25	20					256.944	374.167	12						337.25	422.75	34					#%start speckle%															160	289.412	37
	270	395.75	21					256.111	375.556	13						336.75	421.25	35					287.353	71.1765	1													160	289.412	38
	#%stop speckle%							256.389	375.833	14						337.25	420.25	36					286.765	72.0588	2													160	289.412	39
	#%start speckle%							256.389	374.722	15						#%stop speckle%							287.941	71.7647	3													160	289.412	40
	214.742	190.996	1					256.389	375	16						#%start speckle%							288.235	71.7647	4													160	289.412	41
	215.214	191.16	2					256.944	375.556	17						258	217.25	1					288.235	72.3529	5													160.588	289.118	42
	#%stop speckle%							256.944	375.556	18						258.5	218	2					288.824	72.3529	6													160.588	289.118	43
	#%start speckle%							256.944	375.556	19						259.75	217.5	3					289.118	72.6471	7													160.588	289.118	44
	254.236	350.02	1					256.944	375.556	20						260.75	218.25	4					290	74.1176	8													160.588	289.118	45
	254.563	350.467	2					256.944	375.278	21						#%stop speckle%							290.588	73.5294	9													160.294	287.941	46
	254.282	350.557	3					256.944	375	22						#%start speckle%							290.882	73.5294	10													160.294	287.647	47
	256.295	349.687	4					257.778	375.278	23						220.5	146	1					291.765	73.5294	11													160.294	286.765	48
	255.219	350.309	5					258.611	374.444	24						221.5	147.25	2					291.765	75.2941	12													160.294	286.176	49
	255.669	351.393	6					257.222	374.722	25						222	148	3					292.059	74.4118	13													160.294	286.176	50
	255.693	350.144	7					257.222	373.611	26						223.25	148	4					291.471	75	14													160.294	286.176	51
	255.322	349.968	8					257.5	374.722	27						224.25	148	5					291.765	75.2941	15													160.882	284.412	52
	257.04	350.576	9					257.5	374.722	28						225	148	6					292.059	74.7059	16													160.588	284.412	53
	256.638	350.604	10					256.389	374.444	29						226.75	148.5	7					293.529	75	17													160.588	284.706	54
	256.918	350.81	11					256.944	375.556	30						228	148.75	8					292.059	75.5882	18													#%stop speckle%
	256.159	350.943	12					256.389	375	31						229.75	149.25	9					292.941	76.1765	19													#%start speckle%
	257.181	350.967	13					257.222	375	32						230	149.25	10					292.647	76.4706	20													316.786	233.571	1
	258.29	351.207	14					258.611	375.556	33						231.75	150.25	11					293.235	75.8824	21													317.143	233.571	2
	259.247	350.596	15					257.5	375	34						233.25	151.25	12					293.824	75.8824	22													317.143	233.571	3
	259.669	351.049	16					258.611	375	35						235	152	13					#%stop speckle%															317.143	233.571	4
	260.386	350.009	17					258.333	374.167	36						235	152.5	14					#%start speckle%															317.143	233.571	5
	259.796	350.6	18					257.5	375	37						236	153.25	15					220.882	163.824	1													317.143	233.571	6
	260.579	350.216	19					257.222	374.444	38						236.5	154	16					222.059	164.412	2													317.143	233.571	7
	260.269	350.61	20					258.889	375	39						238.5	154.75	17					221.765	164.412	3													317.143	233.571	8
	260.238	350.715	21					259.167	374.167	40						239	155.25	18					223.235	164.706	4													317.5	233.214	9
	260.788	350.378	22					258.333	374.167	41						241	156.25	19					223.529	163.824	5													317.5	233.214	10
	261.657	350.522	23					258.056	373.056	42						241.25	156.25	20					223.824	164.118	6													317.5	233.214	11
	262.691	350.878	24					258.611	373.333	43						241.25	156.25	21					224.118	164.118	7													315.714	232.5	12
	263.182	351.15	25					258.611	374.167	44						242.75	156.25	22					225.294	163.824	8													316.071	232.143	13
	263.107	351.044	26					258.889	374.167	45						243.5	156.25	23					226.471	164.118	9													316.071	232.143	14
	263.845	351.323	27					260.556	375	46						244	156.5	24					227.353	165.588	10													315	232.143	15
	#%stop speckle%							259.167	373.889	47						245.25	157.25	25					226.765	164.706	11													316.429	232.143	16
	#%start speckle%							259.722	373.333	48						#%stop speckle%							229.118	164.706	12													316.429	232.143	17
	291.266	179.646	1					260.556	373.889	49						#%start speckle%							227.059	164.706	13													316.429	231.786	18
	292.208	180.027	2					258.611	373.056	50						244	124	1					228.824	165.588	14													316.071	231.429	19
	292.03	180.679	3					259.444	373.056	51						245.75	124.5	2					228.529	165	15													315.714	231.786	20
	292.11	180.828	4					258.889	372.778	52						247.25	125.25	3					228.529	164.706	16													315.357	231.429	21
	293.328	181.212	5					258.056	373.056	53						247.75	125.75	4					229.706	165	17													315	231.071	22
	293.79	182.052	6					259.167	373.333	54						249	126	5					230.294	165.882	18													314.643	230.714	23
	#%stop speckle%							258.056	373.889	55						#%stop speckle%							231.176	164.706	19													314.643	230.357	24
	#%start speckle%							257.778	373.056	56						#%start speckle%							230.882	165.882	20													313.929	230.714	25
	255.537	438.352	1					258.333	373.056	57						272.75	357	1					232.059	166.176	21													314.643	229.286	26
	255.792	438.342	2					258.333	373.889	58						274	356.25	2					232.353	165.294	22													314.643	229.286	27
	256.27	438.075	3					258.611	372.5	59						274.25	356.5	3					233.824	165.294	23													314.643	229.286	28
	256.401	437.812	4					258.056	372.778	60						273.75	355	4					233.235	165.882	24													314.643	229.286	29
	256.838	437.483	5					258.333	373.056	61						274.5	354.75	5					233.529	166.765	25													314.643	229.286	30
	257.169	437.527	6					259.167	373.056	62						275.5	355.25	6					233.529	166.176	26													314.643	229.286	31
	257.687	437.298	7					#%stop speckle%								275	355	7					233.529	166.765	27													314.643	229.286	32
	258.045	437.368	8					#%start speckle%								276.5	353.5	8					233.529	167.059	28													314.643	229.286	33
	257.897	437.539	9					278.889	324.167	1						#%stop speckle%							236.765	167.353	29													314.643	229.286	34
	258.737	437.249	10					278.889	323.611	2						#%start speckle%							235.882	167.353	30													314.643	229.286	35
	258.628	437.46	11					278.611	324.722	3						252.5	314	1					236.471	166.471	31													314.643	229.286	36
	259.166	436.939	12					278.611	324.722	4						254.25	314	2					237.059	165.882	32													314.643	229.286	37
	259.691	437.409	13					278.611	324.722	5						254	314	3					237.059	166.176	33													313.571	228.571	38
	259.689	436.151	14					278.611	324.722	6						254.5	313.75	4					237.647	166.765	34													313.929	227.5	39
	260.211	436.516	15					278.333	325.278	7						256.5	313.5	5					237.353	166.765	35													313.929	227.5	40
	260.491	436.618	16					277.222	325.556	8						257	312.75	6					239.412	167.353	36													313.214	228.571	41
	260.922	436.219	17					278.333	325.833	9						257	312.75	7					240.294	167.353	37													313.214	228.571	42
	260.784	436.27	18					278.056	325.556	10						259	312.25	8					239.706	166.765	38													313.214	228.571	43
	261.118	436.166	19					278.056	326.667	11						260	312.25	9					240	167.647	39													313.214	228.571	44
	261.737	435.73	20					278.056	326.667	12						260.5	311.75	10					240.294	167.059	40													312.143	226.429	45
	262.285	435.52	21					278.056	326.667	13						261.5	311	11					240	166.765	41													312.143	227.5	46
	262.417	435.406	22					278.056	326.667	14						263.5	310.25	12					241.176	167.059	42													312.143	227.5	47
	263.004	435.746	23					278.056	327.778	15						264.5	310	13					240.294	167.059	43													312.143	227.5	48
	263.717	435.237	24					278.056	327.778	16						265.5	310	14					240.882	167.647	44													310.714	226.786	49
	263.613	434.708	25					278.056	327.778	17						266.25	311.25	15					240.882	167.353	45													310.714	226.786	50
	264.049	434.507	26					278.056	327.778	18						266.75	310.5	16					#%stop speckle%															310.714	226.786	51
	264.762	434.804	27					278.056	327.778	19						267	309.75	17					#%start speckle%															310.357	226.786	52
	264.907	434.399	28					278.056	327.778	20						267.75	309.75	18					294.029	266.756	1													309.643	226.429	53
	264.948	434.106	29					278.056	327.778	21						269	311	19					293.667	266	2													309.643	227.143	54
	265.603	433.885	30					276.944	328.333	22						271	310.75	20					293.667	266	3													#%stop speckle%
	265.942	433.516	31					276.944	328.333	23						271	311	21					293.667	266	4													#%start speckle%
	266.267	433.654	32					277.5	328.333	24						271.75	311.5	22					294	264.667	5													162.333	365.667	1
	266.835	433.294	33					277.5	328.333	25						273.75	311.5	23					294	264.667	6													161	364	2
	266.741	433.307	34					277.222	330	26						273.75	311	24					294.333	264.333	7													163	363	3
	267.184	433.166	35					277.222	330	27						275	311	25					294.333	264.333	8													163.333	362.667	4
	267.692	433.012	36					277.222	330	28						275.25	310.75	26					295	265.333	9													162.667	362	5
	268.021	432.741	37					277.222	330	29						275.5	310.75	27					294.333	265	10													162.667	361.333	6
	268.6	432.646	38					277.222	330.556	30						275.25	310.75	28					294.667	265.333	11													163	361	7
	269.122	432.276	39					277.222	329.444	31						275.5	309.75	29					294.667	264.333	12													163	361	8
	269.405	432.045	40					277.222	329.444	32						275.5	310	30					294.667	264.667	13													163.333	360.667	9
	269.135	432.33	41					277.222	329.444	33						276	309.5	31					295	265.667	14													163.333	359.333	10
	269.936	432.102	42					277.222	329.444	34						276.75	309.5	32					295	265.667	15													163.333	359.333	11
	270.083	432.027	43					277.222	329.444	35						277	309	33					295.333	265.333	16													162.667	358.333	12
	270.042	431.43	44					277.222	329.444	36						278	309.25	34					295.667	265	17													163.333	359.667	13
	270.426	431.155	45					277.778	330.833	37						277.25	309.5	35					296.333	265.667	18													163	358.667	14
	271.12	430.649	46					277.778	330.833	38						#%stop speckle%							296.333	265.667	19													163	358.667	15
	270.769	430.483	47					277.778	330.833	39						#%start speckle%							296.333	265.667	20													162.667	358.333	16
	271.511	430.297	48					277.778	331.111	40						274.25	373	1					297	266.333	21													163	358	17
	271.849	430.4	49					277.778	331.111	41						275.5	373	2					297	266.333	22													163	357.667	18
	272.228	429.839	50					277.778	331.667	42						275.5	373	3					296	266.667	23													163.333	357	19
	272.433	429.966	51					277.778	331.667	43						276.5	372	4					297.333	265.667	24													163.333	357	20
	273.105	430.051	52					277.778	331.944	44						278.5	371.5	5					297	266.333	25													163.333	356	21
	273.676	428.862	53					278.056	332.222	45						279	371.5	6					297	264.667	26													163	355.667	22
	273.744	429.176	54					278.056	332.222	46						278.5	369.25	7					298	260.333	27													163	355.667	23
	#%stop speckle%							278.056	333.056	47						280	369	8					298.333	256.333	28													162.667	355	24
	#%start speckle%							278.056	333.056	48						281.25	368.25	9					297.667	255.333	29													163	354.667	25
	282.188	114.062	1					278.611	333.611	49						281.5	367.25	10					297.667	255.333	30													164	353.667	26
	281.875	113.438	2					278.611	333.611	50						282	367.25	11					296.333	252.333	31													163.333	355	27
	281.875	113.438	3					278.611	333.611	51						#%stop speckle%							297.333	252	32													164	353.667	28
	281.875	113.438	4					278.611	333.611	52						#%start speckle%							296.333	249.333	33													164.333	353.667	29
	283.438	115.312	5					278.611	333.611	53						310.25	78.25	1					294.667	248	34													164.333	353.667	30
	283.438	115.312	6					278.333	333.611	54						311.25	79.25	2					297	248.333	35													164.667	353.667	31
	283.438	115.312	7					278.333	333.611	55						313	79.5	3					296.667	246.667	36													164	353	32
	283.438	115.312	8					278.333	333.611	56						314	81.25	4					296	246.667	37													164	353	33
	283.75	115.938	9					278.333	333.611	57						314.25	80.75	5					291.667	244	38													164	353	34
	283.75	115.938	10					278.333	333.611	58						315	81.75	6					291.667	242.667	39													163.333	352.667	35
	283.75	115.938	11					278.056	333.056	59						316.25	81.75	7					292.333	242	40													163.333	352.667	36
	#%stop speckle%							278.056	332.778	60						317	82.25	8					#%stop speckle%															163.333	352.667	37
	#%start speckle%							278.056	332.778	61						318	82.75	9					#%start speckle%															163.333	352.667	38
	255.545	307.148	1					276.111	332.5	62						318.25	83.25	10					272.333	153.333	1													163.333	352.667	39
	256.608	307.313	2					276.944	333.611	63						319.25	84	11					273.667	153.667	2													163.333	352.667	40
	256.664	307.323	3					276.944	333.611	64						320.25	85	12					275	154.333	3													163.333	352.667	41
	257.338	307.75	4					276.111	333.889	65						321.5	85.75	13					274.667	153.333	4													#%stop speckle%
	257.436	307.848	5					275	334.722	66						323.25	86	14					275.333	154.333	5													#%start speckle%
	257.448	308.311	6					273.889	335	67						324	86.75	15					275.333	153	6													360.455	215.455	1
	257.395	308.289	7					273.611	335.556	68						324.25	87.25	16					275.333	152.667	7													362.273	215	2
	257.919	308.207	8					273.611	335.556	69						325	86.75	17					274.667	153.667	8													362.273	215	3
	258.485	308.193	9					273.056	335.833	70						326	86.5	18					275	153.333	9													360.909	213.636	4
	258.449	308.081	10					273.056	336.944	71						326.25	86	19					275.333	154	10													359.545	213.636	5
	259.171	308.499	11					#%stop speckle%								327	86.5	20					275.667	153	11													359.091	214.091	6
	260.005	308.816	12					#%start speckle%								327.75	87.25	21					#%stop speckle%															359.091	214.091	7
	260.194	309.046	13					297.778	147.778	1						328.75	88	22					#%start speckle%															359.091	214.091	8
	259.901	308.743	14					296.111	149.444	2						329.5	87.75	23					263.529	333.235	1													358.636	213.636	9
	259.979	309.274	15					298.333	150	3						330	89	24					265	333.235	2													358.636	212.727	10
	260.599	309.477	16					297.222	150.278	4						331	87.5	25					265.294	332.941	3													358.636	212.727	11
	260.828	309.625	17					296.944	150.278	5						331.25	89.5	26					265.588	332.353	4													358.636	212.727	12
	261.011	309.945	18					296.111	150.556	6						331.5	89	27					265.294	332.059	5													358.636	212.273	13
	261.971	309.057	19					297.222	151.389	7						332.5	89.25	28					265.882	332.353	6													358.636	212.273	14
	262.712	309.306	20					297.222	150.278	8						332.5	89.5	29					266.176	333.235	7													358.636	212.273	15
	262.778	309.092	21					297.222	150.278	9						332.75	91	30					266.471	332.353	8													358.636	212.273	16
	262.412	309.027	22					297.222	150.278	10						333.25	91.75	31					265.294	332.059	9													358.636	212.273	17
	263.463	309.263	23					297.222	151.111	11						334	91.5	32					266.765	331.176	10													358.636	212.273	18
	264.269	309.779	24					297.222	151.111	12						334	90.5	33					267.059	331.176	11													357.727	212.273	19
	264.418	309.315	25					298.611	152.222	13						333.5	91.5	34					267.941	331.765	12													357.273	212.273	20
	265.13	310.319	26					298.611	152.222	14						334.25	91.5	35					267.647	332.059	13													357.273	211.818	21
	265.101	310.2	27					298.889	151.389	15						334.75	91.5	36					267.647	331.176	14													357.273	211.818	22
	265.56	310.744	28					299.167	152.5	16						334.75	92.75	37					267.941	332.647	15													357.273	211.818	23
	265.506	310.859	29					299.167	152.5	17						335.25	93.25	38					268.235	332.647	16													355.909	211.364	24
	266.491	310.541	30					299.167	152.5	18						336	93.5	39					268.235	330.882	17													356.818	211.818	25
	266.544	310.619	31					299.167	152.5	19						335.5	93	40					268.529	331.765	18													356.818	211.818	26
	267.316	310.545	32					299.167	152.5	20						334.75	92.25	41					268.529	331.765	19													356.818	211.818	27
	267.766	310.97	33					#%stop speckle%								335	92.75	42					268.529	331.765	20													356.818	211.364	28
	267.754	310.747	34					#%start speckle%								335	93.5	43					268.529	331.765	21													356.818	211.364	29
	268.819	310.369	35					266.944	182.778	1						335.5	93.25	44					268.529	331.765	22													356.818	211.364	30
	269.244	310.732	36					266.944	181.667	2						334.5	93.25	45					268.529	331.765	23													356.818	210	31
	268.517	311.062	37					266.667	181.667	3						335	94.25	46					268.235	331.765	24													356.818	210	32
	268.429	311.037	38					266.944	182.222	4						336	95	47					268.824	332.353	25													356.818	210	33
	269.485	311.853	39					#%stop speckle%								335.75	96	48					268.824	332.353	26													356.818	210	34
	#%stop speckle%							#%start speckle%								336.75	96.25	49					269.412	332.647	27													356.818	210	35
	#%start speckle%							266.316	448.421	1						337.75	98	50					269.412	332.647	28													356.818	210	36
	294	130.5	1					266.053	448.421	2						336.75	97.25	51					269.118	332.647	29													356.818	210	37
	294.5	130.75	2					266.053	447.632	3						#%stop speckle%							270.294	333.529	30													356.818	210	38
	294.5	131	3					267.105	447.895	4						#%start speckle%							270	333.529	31													356.818	210	39
	295.25	131.75	4					266.053	448.158	5						252.25	320.25	1					270.294	333.235	32													358.182	210.455	40
	295	131.5	5					267.105	447.632	6						253.5	320.5	2					270.294	333.235	33													357.727	210	41
	295.5	132.5	6					267.105	447.632	7						254.5	319.75	3					270.294	333.235	34													357.273	210	42
	295	132.25	7					267.105	447.632	8						256.25	319.5	4					270.294	333.235	35													357.727	209.545	43
	296.75	132.75	8					267.895	447.895	9						257.25	320	5					270.294	333.235	36													357.727	209.091	44
	296.75	133.5	9					267.895	447.895	10						257.75	320	6					270.294	333.235	37													357.273	207.727	45
	297.5	133.5	10					267.895	447.895	11						258.25	319.75	7					270.294	333.235	38													356.818	207.727	46
	298.25	134	11					267.632	446.579	12						259	318.5	8					270.294	333.235	39													357.273	209.545	47
	298.25	134	12					267.895	446.316	13						260.5	319.75	9					270.294	333.235	40													#%stop speckle%
	298.75	134.5	13					267.895	446.316	14						261	318.75	10					270.294	333.235	41													#%start speckle%
	297.5	134.5	14					268.158	446.842	15						262	317.5	11					270.294	333.235	42													145.667	266.333	1
	298.25	135.5	15					268.158	446.842	16						263.5	317.5	12					268.235	334.118	43													145	265.667	2
	299.25	136.5	16					268.158	446.842	17						264.25	316.75	13					268.529	333.824	44													145.333	265	3
	299.75	136.5	17					268.947	446.316	18						266	316.25	14					270	333.824	45													145.333	265	4
	300	137	18					268.947	445.263	19						267.25	316.5	15					270	333.824	46													146	264.333	5
	300	137	19					269.737	445.789	20						267.25	316	16					270	333.824	47													146	264.333	6
	301	137.5	20					269.737	445.789	21						267.5	316	17					270	333.824	48													146	264.333	7
	300.75	137.25	21					270	445.789	22						#%stop speckle%							270	333.824	49													146	264.333	8
	301.5	137.75	22					270	445.789	23						#%start speckle%							270	333.824	50													146	264.333	9
	302	138	23					270	445.789	24						291.75	442.25	1					269.706	333.824	51													146	264.333	10
	303	138.5	24					270	445.789	25						293	442.25	2					269.706	334.118	52													146	264.333	11
	303.25	137.25	25					270.263	445.526	26						293	442.25	3					269.118	334.118	53													145.667	264.333	12
	303.75	138	26					271.316	445.263	27						293.5	441.25	4					268.529	333.824	54													145.667	264.333	13
	304.25	138.5	27					271.316	445.263	28						294	439.75	5					#%stop speckle%															145.333	263.333	14
	304.25	139	28					271.316	444.737	29						294.75	439.5	6					#%start speckle%															145.333	263.333	15
	305	139.5	29					271.579	443.947	30						295	438.25	7					263.235	343.529	1													144.667	263	16
	305	139.5	30					271.579	444.211	31						295.25	437.25	8					263.824	343.529	2													144.667	263	17
	305.5	139.75	31					#%stop speckle%								295.25	436.5	9					264.412	344.118	3													144.667	263	18
	306.25	140.25	32					#%start speckle%								297.5	436	10					265.588	344.118	4													144.667	263	19
	306.5	141.5	33					235.833	366.944	1						298.25	434.75	11					265.882	343.824	5													144.333	262.667	20
	306.75	141.25	34					236.944	367.222	2						298.5	433.75	12					266.176	343.824	6													144.333	262.667	21
	307	142.25	35					236.944	368.056	3						300.25	432.75	13					266.471	344.118	7													144	262.667	22
	307.5	142.25	36					236.389	367.778	4						299.25	432	14					267.353	343.235	8													144	262.667	23
	307.25	142.5	37					236.389	367.778	5						299.25	431.25	15					267.353	342.353	9													143.667	262.333	24
	307.75	142.75	38					236.111	367.5	6						300	430	16					267.353	342.941	10													143.667	261.667	25
	307.75	142.75	39					236.111	367.5	7						300.75	428	17					267.941	342.353	11													143.667	261.667	26
	308.25	143.5	40					236.389	367.5	8						302.25	427.25	18					267.647	342.059	12													143.667	261.667	27
	309	144	41					236.667	367.5	9						302.25	427	19					267.941	341.765	13													143.667	261.333	28
	309.25	144.25	42					236.667	367.5	10						302.25	425.25	20					268.235	341.765	14													143.667	260.667	29
	309.25	145.25	43					236.667	367.5	11						303.75	425.25	21					269.412	342.059	15													143.667	260.667	30
	309.5	145.25	44					236.667	367.5	12						303.5	425	22					269.412	342.059	16													143	259.333	31
	310	145.75	45					236.389	367.778	13						303.25	423.75	23					269.412	342.059	17													143.333	259.333	32
	310	146	46					236.111	367.778	14						304	423	24					270	342.353	18													143.333	259.333	33
	309.75	146	47					238.056	367.778	15						303.5	423.75	25					270	342.353	19													143.333	259.333	34
	311	146.75	48					237.5	366.944	16						304.25	423.25	26					270.588	342.353	20													143.333	259.333	35
	311.25	147.25	49					238.056	367.5	17						304	422.25	27					270.294	341.471	21													143	258.667	36
	311.75	146.25	50					238.056	367.222	18						306.5	419.25	28					270.294	342.059	22													143.667	257.333	37
	312.25	146.75	51					238.333	367.222	19						306.5	418.75	29					270.294	342.059	23													143.667	255.667	38
	312.25	146.75	52					238.333	367.222	20						307	418.75	30					270.294	342.059	24													144.333	255.667	39
	312.5	147.5	53					238.333	367.222	21						308	417.5	31					270.588	342.353	25													144.333	255.333	40
	313.5	148	54					238.889	367.5	22						308.5	417.25	32					270.882	342.647	26													144.333	254.667	41
	#%stop speckle%							238.611	367.222	23						308.25	415.75	33					270.882	342.647	27													144.667	254	42
	#%start speckle%							239.722	366.944	24						309.25	415.75	34					270.882	342.647	28													144.333	254.333	43
	264.221	173.611	1					238.056	366.667	25						309.75	414.75	35					270.882	342.647	29													144.333	252.333	44
	264.338	173.675	2					239.167	366.944	26						310.25	414.75	36					270.882	342.647	30													144.333	252.333	45
	264.97	174.049	3					239.167	366.944	27						311.25	412.25	37					270.882	342.647	31													144.333	251.333	46
	265.61	174.533	4					239.167	366.944	28						311.25	412.5	38					270.882	342.647	32													144.333	251.333	47
	266.192	175.093	5					240	366.389	29						312.5	412.5	39					270.882	342.647	33													145.333	250.667	48
	266.343	174.967	6					240	366.389	30						312.5	411.5	40					271.765	342.647	34													145.333	249.667	49
	267.091	175.594	7					240	366.389	31						313.25	410.5	41					272.647	342.353	35													146	249.667	50
	267.254	176.372	8					240	366.389	32						312.5	409.5	42					272.059	342.353	36													146	248.333	51
	267.27	176.397	9					239.722	366.667	33						313.25	408.25	43					272.059	342.353	37													146	248.667	52
	267.317	176.145	10					240	367.222	34						314	408.5	44					272.059	342.353	38													146.333	247	53
	268.116	176.541	11					240	367.222	35						314.25	407.5	45					272.059	342.353	39													146.667	245.333	54
	268.471	177.173	12					240	367.222	36						315.25	405.75	46					272.941	342.647	40													#%stop speckle%
	269.352	176.979	13					239.722	366.944	37						314.75	405.25	47					273.529	342.941	41													#%start speckle%
	269.5	177.75	14					240.278	367.222	38						315.75	404	48					273.824	342.941	42													404.091	314.091	1
	269.823	178.641	15					240.278	367.222	39						315.75	403.25	49					273.824	342.941	43													402.273	315.455	2
	270.644	178.87	16					240.278	367.222	40						316.75	402	50					273.529	344.706	44													403.182	314.545	3
	270.978	178.707	17					241.667	367.5	41						316.25	401.75	51					273.824	344.706	45													#%stop speckle%
	271.023	178.758	18					240.833	366.944	42						317.75	402.25	52					273.824	344.706	46													#%start speckle%
	271.348	179.187	19					241.667	367.5	43						316.25	400.25	53					273.824	344.706	47													311	279.333	1
	272.187	179.559	20					241.389	367.5	44						319	398.75	54					273.824	344.706	48													#%stop speckle%
	272.512	180.337	21					241.667	367.5	45						#%stop speckle%							273.824	344.412	49													#%start speckle%
	273.771	180.745	22					241.944	367.222	46						#%start speckle%							273.235	345	50													155.333	260.333	1
	273.924	180.777	23					241.944	367.222	47						269	378	1					273.235	345.294	51													155.333	259.333	2
	273.878	180.844	24					241.944	367.222	48						269.5	380	2					274.118	345.588	52													155.333	259.333	3
	274.45	181.827	25					241.944	367.222	49						270.25	376.75	3					274.706	346.176	53													155.333	259.333	4
	275.137	182.101	26					241.667	367.222	50						271	377.75	4					274.118	345.588	54													155.333	259.333	5
	275.657	182.498	27					241.667	367.5	51						272.25	377	5					#%stop speckle%															155.333	259.333	6
	275.92	181.863	28					242.5	367.222	52						272.75	375.75	6					#%start speckle%															155.333	259.333	7
	275.555	182.176	29					243.333	367.5	53						273	375	7					280	366.154	1													155.333	259.333	8
	277.522	182.037	30					243.611	367.5	54						274.5	375	8					#%stop speckle%															155.333	259.333	9
	277.528	182.568	31					243.333	367.5	55						274.5	374.5	9					#%start speckle%															155.333	259.333	10
	276.951	182.914	32					243.056	368.333	56						274.25	373	10					218.235	135.882	1													155.333	259.333	11
	277.668	183.282	33					243.056	368.333	57						275.75	372.5	11					219.118	135.882	2													155	259.667	12
	278.431	183.7	34					242.5	368.333	58						276.25	372.5	12					220.294	136.765	3													155	259.667	13
	278.181	183.741	35					242.5	368.333	59						277.25	372.25	13					220.588	137.353	4													155	259.667	14
	#%stop speckle%							242.5	368.056	60						278	371.75	14					221.765	136.765	5													154.667	259.333	15
	#%start speckle%							241.944	368.056	61						279	371.5	15					221.765	136.471	6													154.667	259.333	16
	275.312	175.938	1					241.944	368.056	62						279	371.25	16					222.353	136.765	7													154.667	259.333	17
	276.875	177.188	2					242.778	367.778	63						279.25	370.25	17					222.941	137.353	8													154	258.333	18
	276.875	177.188	3					242.778	367.778	64						280.25	369.75	18					222.941	136.765	9													155.667	259.333	19
	276.875	177.188	4					242.5	367.5	65						280.25	368.75	19					223.529	137.059	10													155.333	258.667	20
	276.875	177.188	5					244.167	368.889	66						280.75	368.25	20					225.294	137.647	11													154.333	258.333	21
	278.438	177.188	6					244.167	369.444	67						281.75	367.75	21					226.765	138.824	12													154.333	258.333	22
	278.438	177.188	7					244.167	369.444	68						282.25	367.5	22					227.647	138.824	13													154.333	258.333	23
	279.062	178.438	8					244.167	369.444	69						282.75	367	23					228.529	139.118	14													154.333	258.333	24
	279.062	178.438	9					243.611	368.889	70						283	366	24					229.118	140	15													154.333	258.333	25
	279.062	178.438	10					243.611	368.889	71						284.75	365.75	25					229.118	140.588	16													154.333	258.333	26
	279.062	178.438	11					#%stop speckle%								285.25	365.25	26					229.118	140.882	17													154.333	258.333	27
	280	180	12					#%start speckle%								286.25	365	27					230	140.882	18													154	257	28
	280	180	13					253.056	185.833	1						287	364.5	28					230.588	142.059	19													155.333	257.667	29
	280	180	14					253.056	185.556	2						287.75	364	29					231.176	142.647	20													155.333	256	30
	280	180	15					253.056	185.556	3						288	363.5	30					231.765	142.941	21													155.333	256	31
	280.938	180	16					253.056	185.556	4						#%stop speckle%							232.647	142.941	22													155.333	256	32
	280.938	180	17					253.056	185.556	5						#%start speckle%							231.765	142.941	23													155.333	256	33
	282.5	180	18					253.333	186.389	6						326.75	90.75	1					232.353	143.235	24													155.333	256	34
	282.5	180	19					253.889	186.389	7						#%stop speckle%							232.941	143.235	25													155.333	256	35
	283.75	180.625	20					253.889	186.389	8						#%start speckle%							232.941	143.529	26													155	256	36
	284.062	182.188	21					254.722	186.111	9						199.25	186.75	1					233.529	143.235	27													154.667	255.667	37
	284.062	182.188	22					254.722	186.111	10						200.25	187.25	2					234.118	143.824	28													154.667	253.333	38
	285.312	183.125	23					254.167	186.111	11						200.25	187.25	3					233.824	143.235	29													155.333	252	39
	285.312	183.125	24					255.278	187.5	12						202.25	188	4					235.294	143.529	30													155.333	252	40
	285.312	183.125	25					255.278	187.5	13						202.25	188	5					236.471	144.706	31													155.333	252	41
	285.938	183.75	26					256.111	188.056	14						203.5	188.25	6					235.882	144.412	32													155.333	252	42
	285.938	183.75	27					256.667	188.889	15						205	188.5	7					236.765	145.294	33													155.333	252	43
	285.938	183.75	28					256.944	187.778	16						205	188.5	8					236.471	145.882	34													155.333	252	44
	285.938	183.75	29					258.056	188.611	17						207	188.75	9					237.353	145	35													155.333	252	45
	285.938	183.75	30					257.222	187.778	18						209	188.5	10					237.647	144.706	36													155.333	252	46
	287.188	184.375	31					257.222	189.722	19						210.5	190	11					237.941	144.412	37													154.667	251	47
	287.5	185.312	32					256.667	188.611	20						211	190.25	12					238.235	144.412	38													154.667	251	48
	287.5	185.312	33					257.778	189.722	21						212.25	190.5	13					238.824	144.706	39													154	248.333	49
	289.062	185.938	34					258.889	188.889	22						212.5	190.5	14					238.235	144.706	40													155	249	50
	289.062	185.938	35					258.333	188.889	23						212.25	190.25	15					239.118	145.588	41													156.667	246	51
	289.062	185.938	36					258.333	188.889	24						214	190.25	16					239.706	145.882	42													156.667	246	52
	290	185.938	37					259.722	189.722	25						216	191	17					239.706	145.882	43													156.667	246	53
	290	186.25	38					260	189.722	26						217	191	18					240.294	145.588	44													156.667	245	54
	290	186.562	39					260	189.722	27						218	190.75	19					240.588	145.294	45													#%stop speckle%
	290	186.562	40					261.667	189.722	28						218.25	191	20					242.647	146.176	46													#%start speckle%
	291.875	187.5	41					261.667	190.278	29						220	190.75	21					241.471	146.176	47													336.818	210	1
	291.875	187.5	42					261.389	191.389	30						221.5	191.5	22					241.176	145.882	48													337.273	210.455	2
	292.5	188.125	43					260.833	190.556	31						222	192.5	23					241.176	145.588	49													336.364	209.545	3
	292.5	188.125	44					261.389	189.722	32						222.5	190.75	24					242.059	146.176	50													336.818	210	4
	292.5	188.125	45					261.389	190.556	33						224	191.75	25					242.941	147.059	51													336.364	209.545	5
	292.5	188.125	46					261.389	190.556	34						226.75	193	26					243.235	147.647	52													336.364	208.636	6
	292.5	188.125	47					261.944	190.556	35						227	192.5	27					244.706	147.941	53													336.364	208.182	7
	293.75	188.75	48					261.944	190.556	36						226.75	192.25	28					244.412	148.529	54													336.364	208.182	8
	294.375	189.062	49					262.222	191.389	37						227.5	193.25	29					#%stop speckle%															336.364	208.182	9
	294.375	189.062	50					263.056	191.667	38						227.5	193	30					#%start speckle%															335	206.818	10
	295.312	190	51					263.611	191.667	39						229.75	193	31					259.412	373.824	1													335.455	207.273	11
	295.312	190	52					263.611	191.667	40						231	192.75	32					259.412	372.647	2													334.545	205	12
	295.312	190	53					265	191.944	41						232	192.75	33					260	372.647	3													334.545	205	13
	#%stop speckle%							265	191.944	42						232.25	193	34					262.059	371.765	4													335.455	205	14
	#%start speckle%							265	190.278	43						234	194	35					262.353	371.765	5													335.909	205.455	15
	244.236	292.471	1					265	191.944	44						235.5	193.25	36					262.647	371.471	6													335.909	204.545	16
	#%stop speckle%							265	191.944	45						236.5	192.5	37					263.529	370.588	7													335.909	204.091	17
	#%start speckle%							265	191.944	46						237.25	193.25	38					265	370	8													335	203.182	18
	251.75	362.5	1					265	191.944	47						237.25	193.25	39					265.294	369.118	9													334.091	203.182	19
	252.25	362.75	2					266.944	192.778	48						237.25	193.25	40					266.176	368.824	10													#%stop speckle%
	252.75	363	3					266.944	192.778	49						240	194.75	41					266.176	368.235	11													#%start speckle%
	253.75	362.75	4					268.333	193.611	50						#%stop speckle%							267.941	369.412	12													161.333	287.667	1
	253.75	363	5					268.333	191.944	51						#%start speckle%							268.235	368.824	13													162	286.667	2
	253.75	363	6					269.167	192.5	52						244.25	233.5	1					268.824	368.529	14													162	286.667	3
	253.75	363	7					269.444	193.056	53						245.5	233.75	2					268.824	367.059	15													161.667	286	4
	254	363	8					269.444	193.333	54						247.25	234	3					267.941	367.353	16													161.333	285	5
	255	363	9					270	193.889	55						247.75	233.75	4					#%stop speckle%															161.333	284.667	6
	255.75	362.5	10					#%stop speckle%								#%stop speckle%							#%start speckle%															161.333	284.667	7
	256	362.5	11					#%start speckle%								#%start speckle%							284.412	395	1													161.333	285.667	8
	256	362.5	12					233.684	433.947	1						234.75	189.25	1					284.706	393.529	2													160.333	284.333	9
	255.25	363.25	13					233.947	434.737	2						237	189.75	2					284.412	393.529	3													160	283.667	10
	256.5	362.5	14					233.947	434.474	3						238.25	190.25	3					285.588	392.647	4													160.667	285.333	11
	257	362.5	15					233.947	434.474	4						238.75	191	4					285.588	392.647	5													160.333	285.333	12
	256.75	362.5	16					234.737	434.211	5						239.25	191	5					286.765	392.353	6													160.667	285	13
	256.75	362.5	17					234.474	434.211	6						241.25	190	6					286.765	391.471	7													161	284.333	14
	256.75	362.5	18					234.474	434.211	7						243.25	191	7					286.765	391.176	8													161	284.333	15
	258.25	362.75	19					235.526	434.737	8						243.5	191	8					285.882	390.882	9													161	284.333	16
	258.25	362.75	20					235.263	434.474	9						244.75	191.75	9					287.941	389.412	10													161	284	17
	258.25	362.75	21					235.263	434.474	10						246	192.5	10					289.706	389.412	11													161.333	284.333	18
	259	362.75	22					235.263	434.474	11						247.75	193	11					290.294	388.824	12													161.333	284	19
	258.75	362.75	23					235.263	434.474	12						248.25	192.25	12					290.588	387.647	13													160.667	284.667	20
	258.75	362.75	24					235.263	434.474	13						248.75	193.25	13					291.765	389.118	14													161.333	284.667	21
	259.5	363	25					235.789	434.474	14						250	193	14					292.941	387.647	15													161.667	284.333	22
	259.5	363	26					236.316	433.947	15						251	194	15					292.353	387.059	16													161.333	284	23
	261	362.75	27					236.316	433.947	16						252.5	194.25	16					293.529	387.059	17													160.333	283.333	24
	261.25	362.75	28					236.842	433.421	17						252.75	192.25	17					293.529	387.353	18													160.333	283.667	25
	261.75	363	29					236.842	433.421	18						253.75	194.25	18					294.118	387.059	19													160	283.333	26
	261.25	362	30					237.105	433.158	19						254.75	194	19					292.059	386.176	20													160	283	27
	261.75	362.25	31					237.105	433.158	20						256.25	194.25	20					292.941	385.882	21													160	283	28
	261.75	362.25	32					237.632	433.158	21						256.75	194.25	21					293.235	385.882	22													160	283	29
	261.75	362.25	33					237.632	433.158	22						258	195.5	22					293.235	386.176	23													160	283	30
	262.5	362.25	34					238.421	433.158	23						258.5	196	23					293.235	386.176	24													160	283	31
	262.5	362.25	35					238.684	432.632	24						259.75	196.5	24					294.118	386.471	25													160	283	32
	263.25	362.5	36					238.684	432.105	25						261.25	196.25	25					294.118	386.471	26													159.667	283	33
	#%stop speckle%							238.684	432.105	26						260.75	195.25	26					294.118	386.471	27													159.333	282.667	34
	#%start speckle%							238.684	432.105	27						263.25	195.75	27					294.118	386.471	28													159.333	282.667	35
	231.438	171.068	1					239.474	432.105	28						264	195	28					294.118	386.471	29													159.333	282.667	36
	231.814	171.149	2					239.474	432.105	29						264.25	195.5	29					294.118	386.471	30													161	281.667	37
	231.755	171.258	3					239.737	431.842	30						265.75	196	30					294.118	386.471	31													160.333	281.333	38
	231.921	171.188	4					240.263	431.842	31						267.5	196	31					294.118	386.471	32													161	281	39
	232.133	171.366	5					240.263	431.842	32						268	196.5	32					292.941	385.588	33													161	280.333	40
	233.217	171.696	6					241.316	431.842	33						268.75	196.75	33					293.235	385.588	34													161	280.333	41
	234.209	172.02	7					241.316	431.316	34						269.25	197.25	34					293.529	385	35													161.667	279	42
	234.239	172.153	8					241.053	430.789	35						269.75	197	35					293.235	384.412	36													161.333	280	43
	234.495	172.245	9					241.053	430.789	36						271.5	197.75	36					292.941	385.882	37													161	279.333	44
	235.001	172.687	10					241.053	430.789	37						272.75	197.75	37					292.647	385.294	38													160.667	278.667	45
	235.511	172.755	11					241.053	430.789	38						273.5	198	38					292.647	385.294	39													161.333	278.333	46
	236.419	173.66	12					241.579	431.053	39						274.75	198.75	39					292.353	384.706	40													161	277.333	47
	236.261	173.508	13					241.579	431.053	40						275.25	198.5	40					292.647	384.706	41													161	276.667	48
	236.508	173.503	14					241.842	431.053	41						276	199	41					292.059	384.706	42													160	276.333	49
	237.095	174.045	15					241.842	431.053	42						277.25	198.25	42					291.765	383.824	43													160.667	275.333	50
	237.472	174.543	16					241.842	431.053	43						278.75	198.75	43					292.059	384.412	44													160.667	274.333	51
	238.363	173.585	17					241.842	431.053	44						278.75	198.5	44					290.882	383.529	45													#%stop speckle%
	238.653	174.095	18					241.842	430.526	45						279.25	198.5	45					#%stop speckle%															#%start speckle%
	238.559	174.322	19					242.632	430.263	46						279.25	198.5	46					#%start speckle%															206	294.667	1
	239.664	174.839	20					242.632	430.263	47						279	198.5	47					260	295	1													206.333	294.667	2
	240.218	175.325	21					242.632	430.263	48						#%stop speckle%							259.231	296.923	2													206	293.333	3
	240.628	175.472	22					242.632	430.263	49						#%start speckle%							262.692	296.538	3													206	293	4
	241.165	175.45	23					#%stop speckle%								226.25	355.25	1					262.308	296.538	4													206	293	5
	240.995	175.499	24					#%start speckle%								225	355.5	2					262.308	296.538	5													206	292.667	6
	241.269	175.987	25					265	477.105	1						227.5	355.25	3					261.923	296.154	6													206	292.667	7
	241.742	176.655	26					265.263	477.368	2						229.25	355	4					261.923	296.154	7													206	292.667	8
	241.991	176.765	27					265.526	477.632	3						229.25	355	5					261.923	296.154	8													206	292.667	9
	242.13	176.765	28					265.526	477.632	4						230.5	355.25	6					261.923	296.154	9													205	291.667	10
	243.178	178.113	29					266.053	477.105	5						230.5	355.25	7					261.923	296.154	10													204.667	292.333	11
	243.162	178.054	30					266.579	476.316	6						233	355	8					261.923	295.769	11													204.667	291.333	12
	243.541	178.021	31					266.842	476.316	7						233	355	9					261.538	295.385	12													204.667	291.333	13
	243.934	177.752	32					267.105	476.842	8						234.25	354	10					261.538	295.385	13													204.667	290.667	14
	245.104	178.64	33					267.105	476.842	9						235	354	11					261.538	295.385	14													204.667	290.667	15
	245.019	178.72	34					267.105	476.842	10						235	354	12					261.538	295.385	15													205	290.333	16
	245.456	178.859	35					267.105	476.842	11						236.25	353.5	13					261.538	295.385	16													204	289.667	17
	245.883	178.7	36					267.632	476.053	12						238.75	352.5	14					261.538	295.385	17													205	288.667	18
	246.365	179.349	37					267.895	475.789	13						239.25	352.75	15					260.769	292.692	18													205	288.667	19
	247.664	180.015	38					268.158	476.053	14						240.75	352.75	16					262.308	293.077	19													205.333	289.333	20
	247.742	180.242	39					268.158	476.053	15						240.75	352.75	17					261.538	292.308	20													205.333	289.333	21
	248.153	180.643	40					267.895	476.053	16						241.5	352.25	18					261.923	292.308	21													205.333	289.333	22
	248.535	180.763	41					267.895	476.053	17						242	352.25	19					260	290	22													205.333	289.333	23
	248.5	180.984	42					267.895	476.053	18						243.25	352.25	20					260	286.923	23													205.333	289.333	24
	248.706	181.025	43					267.895	476.053	19						244.25	352	21					259.615	286.538	24													205.333	289.333	25
	249.328	181.316	44					267.895	474.474	20						245	351.75	22					257.308	284.231	25													205.333	289.333	26
	250.227	181.939	45					269.211	474.737	21						244.75	350.5	23					258.077	284.231	26													205.333	289.333	27
	250.939	182.591	46					269.211	474.737	22						246	351	24					256.923	282.692	27													205.333	289.333	28
	250.747	182.656	47					269.211	474.737	23						246.75	351.75	25					257.308	282.308	28													205.333	289.333	29
	251.773	182.928	48					269.211	474.737	24						247.25	351.25	26					256.923	281.923	29													205.333	289.333	30
	252.441	182.875	49					269.211	474.737	25						247	350.75	27					257.692	279.615	30													205.333	289.333	31
	252.5	183.237	50					269.211	474.737	26						248.75	349.25	28					258.846	280	31													204	290	32
	252.997	183.489	51					269.211	474.737	27						249	349.5	29					258.077	277.308	32													204	288	33
	253.256	184.224	52					269.474	474.474	28						249.5	349.5	30					259.615	277.692	33													203.333	288.333	34
	253.491	183.924	53					269.474	474.211	29						250	349.5	31					259.615	277.692	34													203.333	288.333	35
	254.37	184.465	54					269.474	474.211	30						250.5	347.75	32					260	275.769	35													203.333	287	36
	#%stop speckle%							270.789	473.421	31						251	348.25	33					259.231	275.385	36													203.333	287	37
	#%start speckle%							271.316	473.158	32						252.25	348	34					259.231	273.077	37													203.333	287	38
	294.75	319.25	1					271.316	473.158	33						252.25	348	35					258.846	273.462	38													203.333	287	39
	295.25	319	2					271.316	472.895	34						252.25	347.25	36					258.462	273.077	39													203.333	287	40
	295.75	319	3					271.579	472.895	35						253.25	346.5	37					258.846	272.308	40													203.333	287	41
	295.75	319.25	4					271.579	472.895	36						254.25	346.75	38					258.462	273.846	41													203	285.667	42
	296	319.5	5					272.105	472.368	37						254.25	345.75	39					259.615	272.692	42													203	285.667	43
	296.25	319.75	6					272.105	472.368	38						254.75	344.75	40					259.615	273.077	43													203	285.667	44
	295.25	319.25	7					271.842	472.105	39						255.25	345.25	41					260.385	271.923	44													203	285.667	45
	295.25	320	8					271.842	472.105	40						256	344.75	42					259.615	270.769	45													203	285.667	46
	296.25	319.5	9					271.842	472.105	41						256	344.75	43					259.615	271.538	46													203	285.667	47
	295.5	319.75	10					271.842	472.105	42						256.75	344.75	44					259.615	271.538	47													203	285.667	48
	295.5	319.75	11					272.368	472.105	43						257.25	344.25	45					260.769	268.846	48													202.667	285	49
	295.25	319.75	12					272.368	472.105	44						259.5	343.25	46					261.538	270.385	49													201	283.667	50
	295	319.75	13					272.368	472.105	45						261	343	47					261.923	269.231	50													201.667	283	51
	295.25	319.75	14					272.632	472.368	46						260.75	343.25	48					260.769	268.846	51													201.667	283	52
	295.25	319.75	15					272.632	472.368	47						261.25	342.5	49					260.769	269.615	52													201.667	282.667	53
	295.25	319.75	16					272.895	471.053	48						262.25	342.25	50					260	269.615	53													201.667	282.667	54
	295.25	319.75	17					272.368	471.316	49						262.25	342.5	51					258.846	269.231	54													#%stop speckle%
	295.25	319.75	18					273.158	471.316	50						263	341	52					#%stop speckle%															#%start speckle%
	294.75	320.25	19					272.632	471.316	51						263.75	341.5	53					#%start speckle%															207.333	305.667	1
	295.25	320.5	20					272.895	471.316	52						264	339.75	54					258.824	308.529	1													207.333	305.667	2
	295.25	320.5	21					272.895	471.316	53						#%stop speckle%							257.941	308.529	2													207.333	304	3
	#%stop speckle%							272.895	471.316	54						#%start speckle%							258.824	308.529	3													207	304.667	4
	#%start speckle%							272.895	471.316	55						205.5	224	1					258.824	308.529	4													206.333	304	5
	304.296	140.336	1					272.895	471.316	56						207.25	223	2					258.824	308.529	5													207	303.333	6
	305.1	140.051	2					272.895	471.316	57						208	224	3					259.412	308.824	6													207	303.333	7
	305.177	140.753	3					272.895	471.053	58						208.75	223.75	4					259.412	308.824	7													207	303	8
	304.807	140.864	4					272.895	471.053	59						210	223.5	5					259.706	309.118	8													207	303	9
	305.475	141.388	5					272.895	471.053	60						210.75	224	6					260	309.412	9													207	303	10
	305.762	140.766	6					272.895	471.053	61						210.75	224	7					260	309.412	10													206	304	11
	306.273	141.171	7					272.895	471.053	62						212.5	224.25	8					260	308.529	11													205.667	304	12
	306.123	142.462	8					272.895	471.053	63						213.75	224.5	9					260	308.529	12													205.667	303.333	13
	307.486	143.73	9					273.158	470.526	64						215.5	225.5	10					260	308.529	13													206	302.333	14
	307.405	144.204	10					273.158	470.526	65						217.25	225.75	11					260	308.529	14													206.333	302.667	15
	307.455	143.359	11					273.158	470.526	66						217.75	225.25	12					260.882	308.235	15													206.333	302.667	16
	307.638	144.447	12					273.158	470.526	67						218.75	225.75	13					261.471	307.647	16													205.333	302	17
	307.959	144.313	13					273.158	470.526	68						218.75	225.75	14					261.471	307.353	17													205.333	302	18
	308.611	144.905	14					272.895	470	69						220.25	226.25	15					261.765	306.765	18													205.333	301.667	19
	308.443	144.846	15					272.368	470	70						221	225.5	16					262.059	307.647	19													205.333	301.667	20
	309.077	145.606	16					272.368	470	71						222.25	225.5	17					262.059	306.765	20													205	301.333	21
	309.492	145.983	17					#%stop speckle%								222.25	225.5	18					262.353	306.765	21													205	301.333	22
	309.473	146.255	18					#%start speckle%								224	226.5	19					261.765	307.059	22													205.333	300	23
	310.242	146.608	19					271.944	147.778	1						225.5	226.5	20					262.059	307.059	23													205.333	300	24
	311	148.25	20					#%stop speckle%								227	226.5	21					262.059	307.059	24													205.333	300	25
	311.3	147.79	21					#%start speckle%								227.5	226.75	22					261.765	306.471	25													205.333	300	26
	311.691	147.682	22					216.316	292.368	1						227.5	226.75	23					261.765	306.471	26													205.333	300	27
	311.975	148.808	23					217.105	293.158	2						227.75	227	24					262.059	306.765	27													205	300.333	28
	312.348	148.303	24					217.105	292.895	3						230	226.75	25					261.471	307.059	28													205	300.333	29
	312.975	149.172	25					217.105	292.895	4						231.25	227.5	26					262.059	307.059	29													205	300.333	30
	313.162	149.404	26					217.105	292.895	5						233.25	228.25	27					262.941	306.471	30													205	300.333	31
	314.25	150.75	27					217.895	293.421	6						233	228.5	28					262.353	307.353	31													204.667	300.333	32
	313.659	151.246	28					217.632	293.421	7						234.75	227	29					262.647	308.529	32													204.667	300.333	33
	313.805	151.496	29					218.158	293.158	8						235.25	227.75	30					261.471	307.353	33													204	301	34
	314.02	152.338	30					218.158	293.158	9						235.5	228	31					261.765	307.059	34													204	301	35
	314.434	152.928	31					218.158	293.158	10						236	228.25	32					262.647	307.353	35													204	301	36
	314.272	153.755	32					218.158	293.158	11						237	228	33					262.353	307.941	36													204.667	301.667	37
	315.039	154.848	33					218.158	293.158	12						238.5	227.75	34					#%stop speckle%															204.667	301.667	38
	315.17	154.7	34					218.421	293.158	13						#%stop speckle%							#%start speckle%															204.667	301.667	39
	315.909	154.762	35					218.421	293.158	14						#%start speckle%							244.412	145	1													204.667	301.667	40
	315.723	154.762	36					218.421	293.158	15						248.5	278.75	1					244.706	144.706	2													204.333	301.667	41
	316.246	155.731	37					218.421	293.158	16						248.5	278.75	2					245.882	145	3													204	301.333	42
	316.926	155.95	38					218.421	293.158	17						250.25	277.75	3					244.412	145	4													204	301.333	43
	#%stop speckle%							218.421	293.158	18						250.25	278	4					245.882	145.882	5													204	301.333	44
	#%start speckle%							218.421	293.158	19						251.75	277.75	5					246.765	146.765	6													203.667	301.333	45
	250.359	185.144	1					218.947	293.158	20						252.25	278.5	6					247.941	146.471	7													202.333	300	46
	250.146	185.2	2					218.684	293.421	21						253.5	278.5	7					248.824	147.353	8													203	298.333	47
	251.055	185.76	3					218.158	293.158	22						254.75	278	8					249.412	147.647	9													203	299	48
	251.74	185.864	4					218.947	293.158	23						256	278.25	9					249.706	148.824	10													203	299	49
	252.175	186.662	5					219.211	293.947	24						256.5	278	10					250.588	148.824	11													203	299	50
	252.836	186.478	6					219.737	293.684	25						256.75	277.5	11					251.765	149.412	12													203	299	51
	253.439	187.096	7					219.737	293.684	26						258	277.5	12					252.647	150.588	13													202.667	300	52
	253.361	187.122	8					219.737	293.684	27						258.75	278	13					252.647	150.294	14													203.667	303.333	53
	254.363	187.054	9					219.737	293.684	28						260.5	277.5	14					253.824	150.588	15													203.667	303	54
	254.41	187.387	10					219.737	293.684	29						260.5	278.5	15					253.824	151.176	16													#%stop speckle%
	255.212	187.604	11					220	293.947	30						262.25	277	16					254.412	151.471	17													#%start speckle%
	255.188	187.978	12					220	293.947	31						262.5	277.25	17					255.294	151.176	18													331.364	214.545	1
	255.434	188.41	13					219.737	293.421	32						263	276	18					255.294	152.353	19													331.364	215	2
	255.74	188.469	14					219.737	293.421	33						264	276.25	19					255	151.471	20													331.818	215	3
	#%stop speckle%							219.737	293.421	34						263.75	275.75	20					256.176	152.059	21													330.909	213.636	4
	#%start speckle%							219.737	293.421	35						264	276.5	21					256.471	152.941	22													330	212.727	5
	262.044	313.508	1					219.737	293.421	36						265.5	276	22					255.294	152.647	23													330.455	212.273	6
	263.129	313.411	2					220.526	293.947	37						#%stop speckle%							256.765	152.941	24													329.545	212.727	7
	263.144	313.65	3					220.263	294.211	38						#%start speckle%							#%stop speckle%															330	212.727	8
	263.808	313.695	4					219.737	294.211	39						292.5	68.5	1					#%start speckle%															330	212.727	9
	264.321	313.81	5					221.316	294.211	40						293.25	68.75	2					308.373	381.371	1													330	211.364	10
	264.643	313.753	6					221.579	293.947	41						294.5	69.5	3					309.231	381.923	2													329.545	210.909	11
	264.696	313.444	7					222.368	294.737	42						295	70	4					309.231	381.923	3													329.091	210	12
	265.252	313.959	8					222.105	294.737	43						296	70.25	5					309.231	381.923	4													329.091	209.545	13
	265.4	313.838	9					222.105	294.737	44						297	71	6					309.615	381.923	5													329.545	210.909	14
	267.034	313.17	10					221.842	294.474	45						296.75	71.75	7					310.769	381.154	6													329.545	210.909	15
	267.519	312.986	11					222.105	294.211	46						299	72	8					310.769	381.154	7													329.545	210	16
	267.528	313.326	12					222.105	294.211	47						299.5	72.25	9					310.769	380.385	8													328.636	210	17
	268.006	313.685	13					222.105	294.211	48						300.75	73	10					310.769	380.769	9													328.636	209.545	18
	268.199	313.395	14					222.105	294.211	49						301.75	73.5	11					311.538	380.385	10													329.091	209.545	19
	268.408	313.707	15					222.105	294.211	50						301.75	73.5	12					311.154	379.615	11													328.182	209.545	20
	268.441	313.79	16					222.105	294.211	51						303	74	13					311.154	379.615	12													328.182	209.545	21
	268.423	313.859	17					222.105	294.211	52						304.25	74.5	14					311.154	379.615	13													328.182	210	22
	268.659	313.893	18					222.105	294.211	53						305.75	74.75	15					311.154	379.615	14													328.182	210	23
	269.436	314.529	19					222.105	294.211	54						305.75	76.25	16					311.154	378.846	15													328.182	210	24
	269.127	315.006	20					222.368	294.474	55						306.75	75.75	17					311.154	378.846	16													327.273	210	25
	269.056	315.04	21					222.632	295	56						308.5	77.25	18					309.231	379.615	17													327.273	210	26
	269.198	315.045	22					223.421	295.263	57						309.25	78	19					311.538	379.231	18													327.273	210	27
	269.355	315.09	23					223.421	295.263	58						310	78.25	20					310.385	378.462	19													326.818	210	28
	269.511	315.151	24					223.947	295.263	59						311.5	78.75	21					308.846	376.538	20													326.818	209.545	29
	269.86	315.154	25					224.474	295.263	60						311.5	78.75	22					309.231	376.923	21													326.364	209.545	30
	271.176	315.512	26					224.737	295.789	61						312.75	79.75	23					309.231	378.077	22													326.364	209.545	31
	271.554	315.586	27					224.737	295.789	62						313	80.5	24					306.538	375.385	23													325.909	209.091	32
	271.624	316.182	28					225	294.737	63						314	81.5	25					306.154	375.385	24													325.455	208.636	33
	271.949	315.736	29					224.474	294.474	64						315	82.25	26					302.308	377.692	25													325.909	209.091	34
	272.48	315.893	30					224.474	295.263	65						316.75	82.5	27					303.462	377.692	26													325.909	209.091	35
	273.053	316.129	31					224.737	294.474	66						316.75	83	28					303.462	377.692	27													326.364	208.182	36
	273.765	315.674	32					225.263	294.474	67						317.5	83.5	29					303.462	377.692	28													326.364	208.182	37
	274.124	315.834	33					225.263	294.474	68						318.75	83.5	30					303.462	378.077	29													326.364	208.182	38
	274.408	316.614	34					225	294.737	69						#%stop speckle%							303.462	377.308	30													325.909	208.182	39
	274.601	316.533	35					225.263	294.211	70						#%start speckle%							303.462	377.308	31													326.818	208.182	40
	275.609	316.397	36					225.263	294.474	71						247.25	347.5	1					303.462	377.692	32													325.909	207.727	41
	275.64	316.76	37					#%stop speckle%								247.75	348	2					303.462	377.692	33													325.455	207.273	42
	275.647	317.663	38					#%start speckle%								248.75	347.75	3					303.462	376.923	34													330.455	205.909	43
	276.038	317.325	39					276.667	307.778	1						249.75	347.25	4					303.077	375.769	35													330.455	205.455	44
	276.575	317.703	40					274.722	307.778	2						251.25	347.25	5					303.077	374.231	36													330.455	205.455	45
	276.535	317.657	41					274.722	307.778	3						252	346.25	6					302.692	375.769	37													330.455	205.455	46
	276.668	317.773	42					274.722	307.778	4						252	346.25	7					301.154	373.462	38													330.455	204.091	47
	276.198	318.685	43					275.278	307.778	5						254.25	346.25	8					302.692	373.077	39													330.455	203.182	48
	276.381	318.405	44					275.278	307.778	6						255.25	345	9					300.385	373.077	40													332.727	202.727	49
	276.923	318.758	45					275.278	308.333	7						255	345.25	10					#%stop speckle%															332.727	202.273	50
	276.664	318.782	46					275.278	308.333	8						256	345	11					#%start speckle%															332.727	202.273	51
	276.737	319.149	47					275.278	308.333	9						#%stop speckle%							243.824	192.647	1													332.727	200.909	52
	276.91	319.357	48					275.278	308.333	10						#%start speckle%							244.706	192.941	2													334.545	200.909	53
	276.119	319.294	49					275.278	308.889	11						240.75	297.75	1					245.294	191.471	3													334.545	200.455	54
	276.579	319.805	50					275.278	308.889	12						243	297.5	2					246.471	191.471	4													#%stop speckle%
	276.673	319.783	51					275.278	308.889	13						243.5	297	3					246.471	191.471	5													#%start speckle%
	276.835	320.149	52					275.278	308.889	14						245.5	297.25	4					247.353	192.353	6													381.429	211.071	1
	276.862	320.253	53					275.278	308.889	15						245.75	297.5	5					248.529	192.941	7													380.357	211.071	2
	277.017	320.52	54					275.278	309.444	16						247.25	297.75	6					249.118	193.235	8													#%stop speckle%
	#%stop speckle%							275	308.611	17						248	297	7					249.118	192.941	9													#%start speckle%
	#%start speckle%							275.278	310	18						249.25	296.25	8					249.706	192.647	10													223.554	323.656	1
	305.25	283	1					274.444	309.444	19						250	296.25	9					250.588	192.353	11													224.091	324.091	2
	306.5	282.75	2					#%stop speckle%								250.75	296.75	10					251.176	192.353	12													223.636	323.182	3
	305.75	283	3					#%start speckle%								251.75	295.5	11					251.176	192.353	13													223.182	322.273	4
	305.25	283.75	4					261.458	426.458	1						252.75	295.5	12					251.176	193.235	14													222.727	323.182	5
	305.75	283.75	5					262.292	426.042	2						252.75	294	13					252.941	192.647	15													223.636	323.182	6
	305.5	283.75	6					263.75	426.042	3						254.5	295	14					253.529	192.941	16													223.182	322.727	7
	305.5	283.75	7					261.667	426.667	4						256.25	294.5	15					253.824	192.941	17													224.091	322.727	8
	305.75	284.25	8					262.708	425.833	5						257.25	294.25	16					252.941	192.647	18													224.091	324.091	9
	305.5	283.75	9					262.917	426.667	6						256.75	294	17					252.941	192.059	19													222.273	322.727	10
	305.5	284.25	10					262.917	426.875	7						258.25	294.5	18					252.647	192.647	20													223.182	323.182	11
	305.75	284.5	11					263.542	426.042	8						259.25	294.5	19					252.941	193.529	21													223.182	323.636	12
	305.75	284.75	12					263.542	426.25	9						260	294.25	20					253.529	193.235	22													224.091	322.273	13
	305.5	283.75	13					263.958	425	10						260.25	293.75	21					253.529	193.235	23													224.091	320.455	14
	305.5	283.75	14					263.958	425	11						260.75	292.75	22					253.529	193.235	24													#%stop speckle%
	305.75	284	15					264.375	424.375	12						262	293.75	23					254.118	192.941	25
	306	284.25	16					263.958	424.375	13						263.75	293.25	24					253.235	192.059	26
	305.25	285	17					263.75	424.375	14						263	292.25	25					253.824	192.353	27
	305.25	285	18					263.958	423.958	15						264.75	293	26					253.235	192.647	28
	305.25	285	19					264.375	423.958	16						264.75	292.75	27					253.235	192.941	29
	305.25	285	20					264.375	423.958	17						266	292.75	28					254.412	192.941	30
	305.25	285	21					265.417	423.542	18						265.75	292.5	29					254.118	193.235	31
	305.25	285	22					265.417	423.75	19						267.25	292.25	30					253.824	192.941	32
	305.25	285	23					266.042	423.542	20						266.75	292.5	31					254.412	192.059	33
	305.25	285	24					266.042	423.125	21						267	291	32					254.118	191.765	34
	305.25	285	25					265.833	423.333	22						267.5	292	33					254.412	192.353	35
	305.25	285	26					266.25	423.125	23						268.75	292.5	34					255.294	190.882	36
	#%stop speckle%							265.833	423.75	24						269.25	291.75	35					255.882	191.176	37
	#%start speckle%							265.625	422.708	25						269	290.5	36					255	190	38
	244.498	224.39	1					266.875	422.708	26						269.5	289.75	37					255	190	39
	244.212	224.259	2					266.667	423.125	27						269.5	291	38					255	189.706	40
	245.471	224.229	3					267.5	422.708	28						270	291.75	39					254.706	189.706	41
	245.678	224.122	4					266.875	422.917	29						270	291	40					255	188.824	42
	246.622	224.609	5					267.083	422.708	30						269.75	292	41					255.588	189.706	43
	246.817	224.355	6					267.5	422.5	31						272	290	42					255.294	189.412	44
	246.987	225.021	7					267.708	422.5	32						273.5	290.75	43					254.412	189.412	45
	#%stop speckle%							267.917	422.5	33						273	289.75	44					254.706	189.706	46
	#%start speckle%							267.917	422.5	34						273.5	289.5	45					255.294	189.118	47
	271	343.5	1					267.917	422.5	35						274	290.25	46					255.294	188.529	48
	271	343.75	2					268.333	422.292	36						274.25	290	47					255.294	188.529	49
	271.25	343.5	3					268.333	422.292	37						272	289.5	48					254.706	187.647	50
	271.25	343.5	4					268.542	422.292	38						272.25	289.5	49					254.706	187.941	51
	272	343.5	5					268.542	422.292	39						273	290.5	50					254.412	187.647	52
	272	344	6					268.542	422.292	40						272.5	289	51					255.294	187.941	53
	272	343.75	7					268.542	422.292	41						272.75	289.25	52					255.588	188.235	54
	#%stop speckle%							268.542	422.292	42						273.25	289.5	53					#%stop speckle%
	#%start speckle%							268.542	422.292	43						273.5	289.75	54					#%start speckle%
	253.955	389.644	1					268.542	422.292	44						#%stop speckle%							290	125.333	1
	254.986	389.73	2					268.542	422.292	45						#%start speckle%							291.333	126.667	2
	255.286	389.231	3					268.542	422.292	46						332	440.5	1					291.667	127.333	3
	255.475	389.12	4					268.75	420.417	47						332.25	439.75	2					291.667	127.333	4
	255.371	389.071	5					268.75	420.625	48						332.75	437.75	3					291	127.333	5
	#%stop speckle%							268.75	420	49						333.25	437.5	4					292.333	128	6
	#%start speckle%							268.75	419.792	50						333.25	436	5					291.667	127.667	7
	268.75	137.25	1					269.167	420.625	51						334	434.5	6					292.667	128.333	8
	269.75	137.5	2					269.167	421.25	52						334.5	434.25	7					292.667	127.667	9
	270.25	138.25	3					269.167	421.042	53						334.75	433.25	8					293	126.333	10
	271.25	139	4					268.958	420.833	54						335.5	432	9					293.667	126.667	11
	271	138.75	5					268.333	420.625	55						335.25	431.5	10					295	129.667	12
	271.75	139	6					268.333	420.417	56						335.5	430.75	11					295.667	129.667	13
	272.5	139.5	7					268.542	420.833	57						335.5	428.75	12					295.333	130.333	14
	272.5	140	8					268.542	420.833	58						336	428	13					294.667	130	15
	273.5	140	9					268.542	420.417	59						336.5	427.5	14					292.667	129.333	16
	273.75	140.5	10					268.542	420.417	60						337.75	426.25	15					294.667	129.333	17
	273.75	140.5	11					268.75	420.625	61						338.25	425	16					295	128.333	18
	274.5	141.75	12					268.75	420.625	62						#%stop speckle%							295	129	19
	275	141.75	13					268.958	420.833	63						#%start speckle%							295	128.667	20
	275.75	142	14					268.958	420.208	64						287.5	84.25	1					296.667	128.333	21
	275.75	142.5	15					268.125	420	65						289.25	86	2					295.667	129	22
	277	143.25	16					268.125	420	66						290	86.25	3					295	130.333	23
	277.25	144.25	17					268.125	420.417	67						290.75	87.25	4					294.333	133.333	24
	277.75	143.75	18					268.125	420.417	68						292.5	88.25	5					293	133.333	25
	277.25	143.75	19					268.125	420.417	69						293	88.25	6					290.667	134.667	26
	278.25	144.5	20					268.125	420.417	70						294.25	89	7					290.667	135	27
	278.25	144.75	21					268.125	420.417	71						294.75	89.25	8					289.333	136	28
	278.25	144.75	22					#%stop speckle%								295.25	89.5	9					291	136	29
	278.5	145.25	23					#%start speckle%								296.5	90.25	10					289.667	138.333	30
	279.75	146	24					294.167	181.944	1						297.75	91.75	11					289.333	138.333	31
	279.75	146.5	25					#%stop speckle%								298.5	92	12					290.333	138.667	32
	279.75	146.5	26					#%start speckle%								299.25	91.75	13					290.333	138.667	33
	279.75	146.5	27					284.5	222	1						300.75	92.25	14					289	139	34
	280.75	147	28					284.5	221	2						301.5	93.25	15					288.333	139.667	35
	281	148	29					285	221.5	3						302	93	16					287.667	140.333	36
	281.75	148	30					284	222	4						303.25	93.75	17					286.333	140.667	37
	282	148.5	31					285	223.5	5						303.5	93	18					285.667	141	38
	283	148.75	32					284.5	223.5	6						304.25	93.75	19					286.667	141.667	39
	283.25	149	33					284.737	223.684	7						306.5	94.25	20					286.333	144	40
	283.5	149.75	34					285	223.421	8						306.5	94.5	21					286	144	41
	284	149.75	35					284.737	223.947	9						308.25	95.25	22					284.667	146	42
	283.75	150.5	36					284.474	224.211	10						308.5	95.25	23					285	145.667	43
	285	150.5	37					284.474	224.211	11						310	96	24					283	146.333	44
	284.75	150.5	38					284.474	224.211	12						310	96.25	25					282.667	147.333	45
	284.75	151.5	39					284.737	225	13						311	97.25	26					284.667	148.333	46
	285	151.25	40					284.737	225	14						312.25	97.5	27					284	149.667	47
	286.5	151.75	41					284.737	225	15						312	98.75	28					284	149.333	48
	287.25	152.5	42					285	226.053	16						313.25	99	29					284	150.333	49
	287.25	152.5	43					285	226.053	17						314.5	99.5	30					283	148.667	50
	287.75	152.25	44					285	226.053	18						314.25	99.5	31					283.667	148.333	51
	288	152.5	45					285.526	226.842	19						315	99.75	32					284	150	52
	287.75	152	46					285.526	226.842	20						317.75	100.75	33					283.667	150.667	53
	288.25	153	47					283.684	226.053	21						316.5	100.75	34					282.333	150	54
	288.5	153.5	48					284.211	226.579	22						316	99.75	35					#%stop speckle%
	289	153.75	49					284.211	226.579	23						316.25	101	36					#%start speckle%
	289.25	154	50					284.211	226.579	24						317.5	101.25	37					237.941	237.941	1
	289.75	154.25	51					284.737	226.316	25						317.75	101.75	38					238.529	237.647	2
	290	154.25	52					284.737	226.316	26						318	102	39					238.235	237.647	3
	290.5	155.25	53					284.737	226.316	27						319	102.25	40					238.824	237.941	4
	290.75	155.5	54					284.474	226.053	28						320	102.75	41					239.706	238.235	5
	#%stop speckle%							285	226.579	29						319.75	102.5	42					240.294	238.235	6
	#%start speckle%							284.474	227.632	30						319.75	102.5	43					241.176	238.235	7
	266.995	469.74	1					284.737	227.105	31						319.25	103	44					241.471	237.941	8
	266.584	468.166	2					#%stop speckle%								320.25	103.25	45					242.941	238.235	9
	#%stop speckle%							#%start speckle%								320	103	46					243.235	238.235	10
	#%start speckle%							257.632	466.579	1						322	103.25	47					244.118	237.941	11
	295.683	143.182	1					257.368	466.316	2						321.5	103.5	48					244.412	237.941	12
	295.238	143.265	2					257.368	466.842	3						321.5	103.75	49					244.412	237.941	13
	295.351	143.436	3					257.105	466.316	4						321.5	104	50					245	237.353	14
	296.198	144.14	4					257.105	466.316	5						322.5	104.5	51					245.588	237.647	15
	296.632	144.389	5					257.368	466.053	6						322.5	103.5	52					245.588	237.647	16
	296.766	144.405	6					257.368	466.053	7						323.75	103.75	53					246.765	237.941	17
	296.759	145.289	7					258.158	466.316	8						323.25	104.5	54					246.765	237.353	18
	297.018	145.602	8					258.158	465.526	9						#%stop speckle%							246.765	237.353	19
	297.266	146.085	9					258.158	465.789	10						#%start speckle%							246.765	237.353	20
	297.275	146.109	10					258.158	465.789	11						283	420	1					246.765	237.353	21
	297.303	146.175	11					258.158	466.053	12						284	420.5	2					246.765	237.353	22
	297.51	146.285	12					258.158	466.053	13						284.75	419.5	3					246.765	237.353	23
	298.968	148.027	13					257.895	465.789	14						284.75	419.25	4					246.765	237.353	24
	299	148.25	14					258.158	465.789	15						285.75	418	5					246.765	237.353	25
	299.289	148.127	15					258.421	466.053	16						286.5	417.75	6					246.765	237.353	26
	300	148.5	16					258.421	466.053	17						286.25	416.5	7					246.765	237.353	27
	300.081	148.44	17					258.421	465.789	18						287.25	416.5	8					246.765	237.353	28
	300.459	148.879	18					258.684	465.526	19						288.25	415	9					246.765	237.353	29
	300.664	149.019	19					258.684	465.263	20						288.5	414.25	10					246.765	237.353	30
	301.122	149.424	20					258.684	465.263	21						289.25	413.5	11					246.765	237.353	31
	301.751	149.508	21					260	463.947	22						289.5	412.25	12					246.471	237.059	32
	301.883	150.393	22					259.737	463.684	23						290	411.5	13					246.176	237.059	33
	302.259	150.26	23					260.263	463.684	24						291.5	411	14					245.882	237.353	34
	302.175	151.187	24					261.316	462.895	25						292	410	15					245.882	237.353	35
	302.732	151.44	25					261.316	462.895	26						293	409	16					246.471	237.941	36
	303.975	151.401	26					261.316	462.895	27						293.5	408	17					246.765	237.941	37
	305.25	152.25	27					261.316	462.895	28						294	407.25	18					246.765	237.941	38
	306.25	153.5	28					261.316	462.895	29						295	406.25	19					246.765	237.941	39
	305.953	153.303	29					261.053	462.895	30						#%stop speckle%							246.176	237.941	40
	306.5	153.75	30					261.053	462.895	31													245.882	237.941	41
	306	154	31					261.316	461.579	32													245.882	237.941	42
	306.75	153.75	32					262.105	461.842	33													245.882	238.235	43
	307.5	154.25	33					262.105	462.105	34													245.882	238.235	44
	307.75	154.5	34					262.105	461.316	35													245.882	238.235	45
	307.5	155.75	35					262.105	461.316	36													246.471	239.118	46
	307.75	155.75	36					262.105	461.316	37													246.765	239.118	47
	308.25	156.5	37					262.105	461.316	38													246.765	239.118	48
	308	156.25	38					262.105	461.316	39													246.765	239.118	49
	308.5	157	39					262.105	461.316	40													246.765	239.118	50
	309	157.5	40					262.105	461.316	41													246.765	239.118	51
	309.75	159.25	41					262.105	461.316	42													246.765	239.118	52
	309.75	157.75	42					263.421	461.579	43													246.471	239.118	53
	310	157	43					263.947	461.579	44													246.176	239.412	54
	310.379	157.69	44					263.421	460.789	45													#%stop speckle%
	310.432	157.602	45					263.421	460.789	46													#%start speckle%
	311.48	158.169	46					263.421	460.789	47													292.198	51.4702	1
	312.225	159.406	47					263.421	460.789	48													293.333	53.3333	2
	312.358	159.452	48					263.421	460.789	49													292.333	53	3
	313.241	159.524	49					263.421	461.316	50													292.667	53	4
	313.339	159.957	50					263.421	461.316	51													295.333	53	5
	313.267	161.487	51					263.421	461.316	52													293.667	55	6
	312.957	161.304	52					263.421	461.316	53													293	55	7
	313.626	162.092	53					263.421	461.316	54													293.333	55.6667	8
	314.168	161.58	54					263.421	461.316	55													293.667	54.3333	9
	#%stop speckle%							263.421	461.316	56													294	56.6667	10
	#%start speckle%							263.421	461.316	57													292.667	56.3333	11
	279.75	473.75	1					263.421	461.316	58													293.333	57	12
	281	473.75	2					263.421	461.316	59													293.667	56.6667	13
	281.25	474.25	3					263.421	461.316	60													#%stop speckle%
	281.75	472.5	4					263.421	461.316	61													#%start speckle%
	281.25	472.25	5					263.421	460.263	62													259	223.667	1
	281.5	472.25	6					263.158	460.263	63													259.667	223.667	2
	282	472.25	7					263.158	460.263	64													259.557	223.068	3
	282	472	8					263.158	460.263	65													260.333	223.333	4
	282	472	9					263.158	460.263	66													259.333	223.333	5
	281.75	471.25	10					263.158	460.263	67													#%stop speckle%
	282.5	471.75	11					262.895	460.526	68													#%start speckle%
	282.5	471.5	12					262.895	460.526	69													308	70.6667	1
	282.5	470.75	13					263.158	458.947	70													308.667	71.3333	2
	283.25	470.5	14					263.158	458.947	71													309	71	3
	283.25	470.5	15					#%stop speckle%															309.333	71.3333	4
	284	469.75	16					#%start speckle%															309	72.6667	5
	284	469.75	17					324.722	143.889	1													308.667	71	6
	284	469.75	18					324.722	143.889	2													309.333	72	7
	284	469.75	19					324.722	143.889	3													310.333	72.3333	8
	284.5	469.25	20					324.722	143.889	4													310.333	72.3333	9
	284.5	469.25	21					324.722	143.889	5													310.333	72.3333	10
	284.5	469.25	22					325.278	144.444	6													310.333	72.3333	11
	285	469	23					325.278	144.444	7													310.333	72.3333	12
	286	468	24					325.278	144.444	8													310.333	72.3333	13
	286.75	467	25					326.111	145	9													310.333	72.3333	14
	286.75	467	26					326.111	145	10													310.333	72.3333	15
	287.25	466.75	27					326.111	145	11													310.667	72.6667	16
	287.25	466.75	28					326.667	145.556	12													310.667	72.6667	17
	287.25	466.75	29					326.667	145.556	13													311	73.3333	18
	287.25	466.75	30					326.667	145.556	14													311	73.3333	19
	287.75	466.75	31					327.5	146.944	15													310	73	20
	289.25	465	32					328.333	147.222	16													311.667	73.6667	21
	289.25	464.75	33					328.333	147.222	17													311.667	73.3333	22
	289.75	464.25	34					328.333	147.222	18													312	73	23
	289.75	464.25	35					328.889	148.333	19													312	72.3333	24
	291	463	36					328.889	148.333	20													311	74	25
	291	462.75	37					328.889	148.333	21													312	74	26
	291	462.5	38					328.889	148.333	22													312	74	27
	291	462.5	39					328.889	148.333	23													312	74	28
	292	463.5	40					330	148.611	24													310.333	72.6667	29
	292.25	463	41					330	148.611	25													310.333	73.3333	30
	291.75	462.75	42					330.556	149.444	26													311	73	31
	292.25	462.25	43					330.556	149.444	27													311.667	74.3333	32
	292.5	462.5	44					330.556	149.444	28													310.667	73.6667	33
	294	461	45					330.556	149.444	29													310.333	73	34
	294.25	460.25	46					330.556	149.444	30													311.667	74.3333	35
	294.75	460.25	47					331.944	149.444	31													310.333	74.6667	36
	294.75	460.25	48					332.222	150	32													310.333	75.3333	37
	294.75	460.5	49					333.056	150.278	33													309.333	73.6667	38
	294.5	460.5	50					333.056	150.278	34													309.667	75.3333	39
	294.5	460.25	51					333.056	150.278	35													310.333	74.6667	40
	294.5	460.25	52					333.333	151.111	36													311.333	75.3333	41
	294.5	460.25	53					333.333	151.111	37													310.667	74.3333	42
	296	459	54					334.167	151.389	38													309.333	73.3333	43
	#%stop speckle%							334.167	151.389	39													309.667	73.6667	44
	#%start speckle%							333.611	151.389	40													309.667	74.3333	45
	250.477	176.781	1					333.611	150.833	41													308.333	72.6667	46
	250.539	177.56	2					333.611	150.833	42													310	74	47
	250.688	177.354	3					332.778	151.667	43													310	75.3333	48
	251.642	177.784	4					332.778	151.667	44													310.667	73.3333	49
	251.945	177.866	5					332.778	151.667	45													310.667	74	50
	253.131	178.284	6					332.778	151.667	46													310.667	74	51
	252.361	179.009	7					332.778	151.667	47													310	74	52
	253.244	179.499	8					332.778	151.667	48													310	74.6667	53
	254.31	179.437	9					332.778	151.667	49													310	74.3333	54
	254.274	179.063	10					332.778	151.667	50													#%stop speckle%
	254.606	179.751	11					331.944	152.222	51													#%start speckle%
	254.774	180.556	12					331.944	152.222	52													262.333	142.333	1
	254.742	180.478	13					331.944	152.222	53													262.667	142.333	2
	255.179	180.507	14					333.333	152.222	54													264	144.333	3
	255.419	180.615	15					333.333	152.222	55													264.333	142.333	4
	256.407	181.088	16					333.333	152.222	56													264.667	143.333	5
	256.548	181.669	17					333.333	152.222	57													265.333	143	6
	256.594	181.933	18					333.333	152.222	58													267.667	142	7
	256.939	182.261	19					333.333	152.222	59													267.667	142.667	8
	257.113	182.914	20					333.333	152.222	60													268	142	9
	258.285	182.612	21					333.333	152.222	61													267.667	142	10
	259.118	183.039	22					333.333	152.222	62													269	144	11
	259.229	183.194	23					#%stop speckle%															269	144.667	12
	259.402	183.508	24					#%start speckle%															269.667	145	13
	259.587	184.088	25					237.632	192.895	1													270.333	145.333	14
	260.468	184.454	26					237.632	192.895	2													272.333	146	15
	260.939	184.67	27					237.895	193.158	3													271.333	146.333	16
	261.456	184.868	28					237.895	193.158	4													271.667	144.667	17
	261.484	185.239	29					238.947	192.895	5													272.333	144	18
	261.323	185.53	30					239.211	193.947	6													273.667	142.333	19
	261.703	185.501	31					239.474	193.684	7													271.333	142.667	20
	262.696	185.943	32					239.737	195	8													272.667	141	21
	262.778	186.243	33					240	194.737	9													273.333	143	22
	263.613	186.435	34					240.789	194.474	10													273.333	143	23
	263.644	187.081	35					241.316	195.526	11													273.667	144	24
	264.506	186.929	36					241.053	195.263	12													274	142.333	25
	264.538	186.779	37					241.316	196.316	13													272.667	142.333	26
	265.677	187.479	38					242.105	196.579	14													274	142.667	27
	265.976	187.53	39					241.579	196.316	15													273	141.333	28
	266.441	187.622	40					242.105	196.842	16													273	143	29
	266.107	188.088	41					242.895	196.579	17													272.333	142.667	30
	267.055	188.059	42					242.632	196.579	18													271.667	141.333	31
	267.76	188.744	43					242.632	196.579	19													272	143.333	32
	267.929	189.019	44					242.368	196.842	20													272.333	143.333	33
	268.051	189.515	45					242.368	197.105	21													272.333	143.333	34
	268.715	189.316	46					243.684	197.632	22													272.667	143.333	35
	269.679	189.144	47					243.158	197.895	23													272.333	143.667	36
	269.998	189.502	48					243.158	197.895	24													271.333	145.667	37
	270.679	189.689	49					243.158	197.895	25													271.333	146.333	38
	270.594	189.839	50					243.421	197.895	26													270.333	145.333	39
	271.035	190.003	51					243.947	198.421	27													271	146	40
	271.755	190.178	52					244.211	198.421	28													271	144	41
	272.336	190.659	53					244.211	198.421	29													270.333	145	42
	272.761	190.621	54					244.737	199.211	30													271.333	144.667	43
	#%stop speckle%							244.737	199.211	31													271.333	145	44
	#%start speckle%							245.263	199.211	32													271.667	145.333	45
	248.746	339.911	1					245.263	199.474	33													271	144.667	46
	249.559	340.006	2					245.263	199.474	34													271	146	47
	249.711	339.698	3					245.263	199.474	35													270	145.667	48
	249.998	339.905	4					246.053	200	36													271	143.333	49
	250.439	339.857	5					246.579	200	37													270	144.333	50
	250.485	340.009	6					247.368	200.263	38													270	145	51
	250.488	339.6	7					248.158	200	39													272	146	52
	250.877	339.646	8					247.632	200.789	40													272	145	53
	251.459	339.933	9					248.158	202.105	41													#%stop speckle%
	253.087	340.006	10					247.895	200.263	42													#%start speckle%
	252.664	339.913	11					248.421	201.316	43													310	106.667	1
	252.973	340.109	12					249.211	201.579	44													310.667	107.333	2
	253.133	340.007	13					249.737	201.316	45													310.333	107.333	3
	253.185	339.936	14					249.737	201.316	46													311.333	107	4
	253.344	339.969	15					250.526	202.105	47													311	105.667	5
	253.898	340.212	16					250.789	202.895	48													312.667	107	6
	254.278	340.492	17					250.789	202.895	49													311.333	105.667	7
	254.422	340.497	18					250.789	202.895	50													311	105.667	8
	254.971	340.097	19					251.053	203.421	51													313.667	105.333	9
	254.989	340.048	20					251.053	203.421	52													311	105	10
	255.702	340.228	21					251.053	203.158	53													311	105.333	11
	256.299	340.158	22					250.789	203.684	54													310.667	105.667	12
	256.144	340.735	23					251.316	203.158	55													308.333	108	13
	257.166	341.021	24					252.368	202.632	56													308	109.333	14
	256.771	340.341	25					251.842	203.421	57													306.333	109.667	15
	258.088	340.363	26					252.368	203.421	58													306	109.333	16
	258.672	340.18	27					252.368	203.421	59													306.333	110.333	17
	258.732	340.604	28					252.632	203.684	60													306.333	109.667	18
	258.864	340.225	29					252.632	204.211	61													306	109.333	19
	258.911	340.597	30					251.579	204.474	62													305	108.333	20
	259.306	340.456	31					251.579	203.684	63													304	109	21
	259.788	340.299	32					#%stop speckle%															304	109.333	22
	260.701	340.496	33					#%start speckle%															302.333	108.667	23
	260.917	340.379	34					254.375	425.833	1													302	107.333	24
	260.976	340.344	35					#%stop speckle%															303	107.667	25
	261.129	340.504	36					#%start speckle%															304	107	26
	261.449	340.394	37					291.389	140	1													303.333	107.667	27
	262.236	340.554	38					291.389	140	2													304	107.667	28
	262.19	340.5	39					292.5	140	3													301.333	107.333	29
	262.788	340.502	40					292.5	140	4													300.333	107.667	30
	263.262	340.605	41					292.5	140	5													301	108	31
	264.003	340	42					292.5	140	6													302	108.667	32
	264.187	340.086	43					292.778	139.722	7													302	107.667	33
	264.336	339.97	44					293.056	140.556	8													303	107.667	34
	264.273	340.093	45					293.056	141.111	9													302.667	107.333	35
	264.885	340.292	46					293.056	141.111	10													303	107.667	36
	264.94	340.121	47					291.667	142.222	11													302.667	107.667	37
	265.684	340.251	48					291.667	142.222	12													303	107.667	38
	266.099	340.316	49					291.667	141.111	13													302.667	106.333	39
	265.866	340.394	50					291.667	141.111	14													302.333	108.333	40
	266.328	340.597	51					292.222	142.222	15													303	107.667	41
	266.708	340.503	52					292.222	142.222	16													302.333	107.333	42
	266.999	340.503	53					292.222	142.222	17													301.667	107.333	43
	267.123	340.324	54					292.222	141.389	18													301.333	107	44
	#%stop speckle%							292.5	141.944	19													301	106	45
	#%start speckle%							293.333	143.333	20													300.333	106.333	46
	239.607	160.845	1					293.333	143.333	21													300.333	106	47
	239.179	161.565	2					293.056	141.944	22													301	106	48
	240.027	161.624	3					293.889	143.333	23													#%stop speckle%
	241.079	161.544	4					293.889	143.333	24													#%start speckle%
	240.796	162.109	5					292.5	143.056	25													326.176	73.2353	1
	241.423	162.355	6					291.667	143.333	26													325.882	73.2353	2
	241.423	162.791	7					291.667	143.056	27													325	74.1176	3
	241.867	163.057	8					292.778	143.611	28													#%stop speckle%
	241.941	163.421	9					293.333	144.167	29													#%start speckle%
	243.232	164.056	10					#%stop speckle%															306	110	1
	243.187	164.136	11					#%start speckle%															304.333	108.333	2
	243.5	163.686	12					244.211	420	1													306	110	3
	243.519	164.18	13					243.684	420	2													306	110	4
	243.777	164.322	14					244.737	420.526	3													307	109.333	5
	244.91	164.634	15					245	420.526	4													307	109.667	6
	244.904	164.443	16					244.737	419.474	5													307	110.667	7
	245.061	165.189	17					245	419.211	6													307.667	110.667	8
	245.946	165.717	18					245.263	419.474	7													307.667	111.667	9
	247.158	165.638	19					246.579	419.474	8													307.667	110	10
	247.138	166.095	20					246.579	419.474	9													306.667	110.667	11
	247.432	166.362	21					246.579	419.474	10													306.333	111	12
	247.877	166.774	22					246.579	419.474	11													#%stop speckle%
	248.091	166.751	23					246.579	419.474	12													#%start speckle%
	248.904	167.112	24					246.579	419.474	13													324.281	84.3474	1
	249.117	167.691	25					246.579	419.474	14													324.659	84.0432	2
	249.836	167.887	26					246.579	419.474	15													324.033	84.0306	3
	250.4	168.54	27					246.579	419.474	16													324.255	83.7714	4
	251.904	169.076	28					246.579	419.474	17													324.667	84	5
	252.988	168.757	29					246.579	419.474	18													324.667	84	6
	#%stop speckle%							246.579	418.947	19													324.667	84	7
	#%start speckle%							246.579	418.947	20													324.333	83.6667	8
	283.75	374.062	1					246.579	418.947	21													324.333	83.6667	9
	#%stop speckle%							246.579	418.947	22													324.333	83.6667	10
	#%start speckle%							246.842	418.684	23													324.333	83.6667	11
	287.5	306	1					246.842	418.684	24													324.333	83.6667	12
	287.75	306.25	2					247.895	417.632	25													323.333	83.6667	13
	287.75	306.25	3					247.895	417.632	26													323.333	83.6667	14
	289.5	306.5	4					247.895	417.632	27													321.333	83.6667	15
	289.25	306.25	5					247.895	417.632	28													322.333	84.3333	16
	289	306.5	6					#%stop speckle%															322.333	85	17
	289.25	306.75	7					#%start speckle%															321	84.6667	18
	289.25	307	8					308.056	158.056	1													319.333	85.3333	19
	289.25	307	9					308.056	158.056	2													317.667	87.6667	20
	289.5	306.75	10					307.5	158.611	3													318	88	21
	289.5	306.5	11					307.5	158.611	4													316.667	87.6667	22
	289.5	306.75	12					307.778	159.167	5													316.667	88	23
	289.5	307.25	13					307.778	159.167	6													315.667	88	24
	289.25	307.5	14					308.056	159.167	7													316.667	86.6667	25
	#%stop speckle%							308.333	159.722	8													314.667	89	26
	#%start speckle%							308.611	159.722	9													314.667	87.6667	27
	283.25	162.5	1					308.611	159.722	10													314.667	87	28
	283.75	162.5	2					308.611	159.722	11													314.667	87	29
	283.75	162.5	3					309.167	160.556	12													315.333	85.3333	30
	283.75	162.5	4					309.167	160.556	13													316.667	83	31
	284	163	5					310.278	160.833	14													318.667	81	32
	284	163	6					310.278	160.833	15													317.667	82.3333	33
	285.25	164.75	7					310.278	160.833	16													317.667	81	34
	#%stop speckle%							310	161.667	17													317.667	79.3333	35
	#%start speckle%							310	161.667	18													317	79	36
	238.25	305.75	1					310	161.667	19													317.667	78.6667	37
	238.75	306	2					310.278	160.556	20													318	77	38
	239.25	306.5	3					310.556	159.444	21													318.333	78	39
	240	307	4					310.833	160	22													317	77	40
	239.75	306.25	5					311.389	160.833	23													317.333	77.6667	41
	240.25	307.25	6					311.389	160.833	24													317.333	77	42
	240.75	306.5	7					310.556	161.667	25													316.667	77.3333	43
	241.25	306.5	8					310.833	161.944	26													316.667	77	44
	241.75	306.25	9					311.111	161.944	27													316.667	77.3333	45
	242	306.5	10					311.111	161.944	28													315.333	78.3333	46
	242.75	307	11					311.111	161.944	29													317	77	47
	242.5	306.75	12					311.111	161.944	30													316	77	48
	242.75	306.5	13					312.222	161.944	31													#%stop speckle%
	243.5	307.25	14					312.222	161.944	32													#%start speckle%
	243.596	306.985	15					312.222	161.944	33													309	91	1
	243.601	307.079	16					312.222	161.944	34													309.667	91.6667	2
	244.514	306.879	17					312.778	162.222	35													310	92	3
	244.856	306.607	18					313.333	163.056	36													310.667	92.6667	4
	245.302	306.559	19					313.333	163.056	37													309	92.3333	5
	245.622	307.478	20					313.333	163.056	38													#%stop speckle%
	246.342	307.204	21					313.333	163.056	39													#%start speckle%
	246.531	306.898	22					313.333	163.056	40													273.529	115.588	1
	247.008	306.62	23					313.333	163.056	41													273.824	116.176	2
	247.505	306.743	24					313.333	163.056	42													273.824	116.176	3
	248.354	307.207	25					313.333	163.056	43													274.118	116.471	4
	248.551	306.957	26					313.333	163.056	44													274.706	117.647	5
	249.029	307.322	27					313.333	163.056	45													274.706	117.353	6
	249.512	307.479	28					313.333	163.056	46													276.471	117.353	7
	250.267	307.289	29					313.333	163.056	47													275.588	116.176	8
	251.032	306.767	30					313.333	163.056	48													276.765	117.353	9
	250.875	307.465	31					313.333	163.056	49													277.059	117.353	10
	251.657	307.107	32					313.333	163.056	50													#%stop speckle%
	251.701	307.369	33					313.333	163.056	51													#%start speckle%
	251.854	307.353	34					313.333	163.056	52													309.706	216.765	1
	252.322	307.368	35					313.333	163.056	53													308.824	216.765	2
	252.311	307.523	36					313.333	163.056	54													309.706	216.765	3
	252.998	307.382	37					312.5	163.056	55													308.824	217.059	4
	253.576	307.422	38					312.5	163.056	56													309.706	217.059	5
	254.836	307.895	39					312.5	163.056	57													309.706	217.647	6
	254.812	308.115	40					312.5	163.056	58													310.294	217.353	7
	255.506	307.648	41					312.5	163.056	59													309.706	217.059	8
	256.319	307.843	42					312.5	163.611	60													309.706	217.059	9
	256.5	308.124	43					312.5	163.611	61													309.706	217.059	10
	256.59	308.142	44					312.5	163.611	62													309.706	217.059	11
	256.957	308.515	45					312.5	163.611	63													309.706	217.059	12
	257.773	308.361	46					312.5	163.611	64													309.706	217.059	13
	257.672	308.752	47					312.5	163.611	65													309.706	217.647	14
	258.759	308.584	48					312.5	163.611	66													310.294	218.529	15
	258.902	309.036	49					312.5	163.611	67													310.294	218.529	16
	259.107	308.916	50					312.5	163.611	68													310.588	219.118	17
	259.269	309.053	51					312.5	163.611	69													310.588	219.118	18
	259.483	309.081	52					312.5	163.611	70													310.588	219.118	19
	259.427	308.97	53					312.5	163.611	71													311.765	219.118	20
	259.953	309.166	54					#%stop speckle%															310.882	220	21
	#%stop speckle%							#%start speckle%															311.471	220	22
	#%start speckle%							308.056	166.111	1													311.471	219.412	23
	283.5	137.25	1					308.333	167.5	2													311.765	220	24
	283.25	137.75	2					308.056	167.5	3													311.765	220	25
[truncated: 634 more rows]
