# Supplementary figures and images for: A mechanism with severing near barbed ends and annealing explains structure and dynamics of dendritic actin networks
Source: eLife journal article supplement (doi:10.7554/elife.69031), 2022-06-06

A

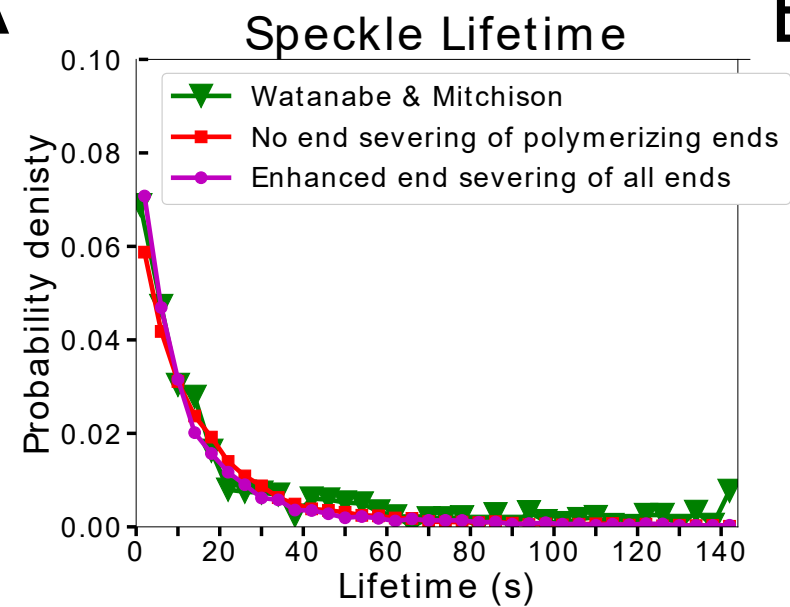

B

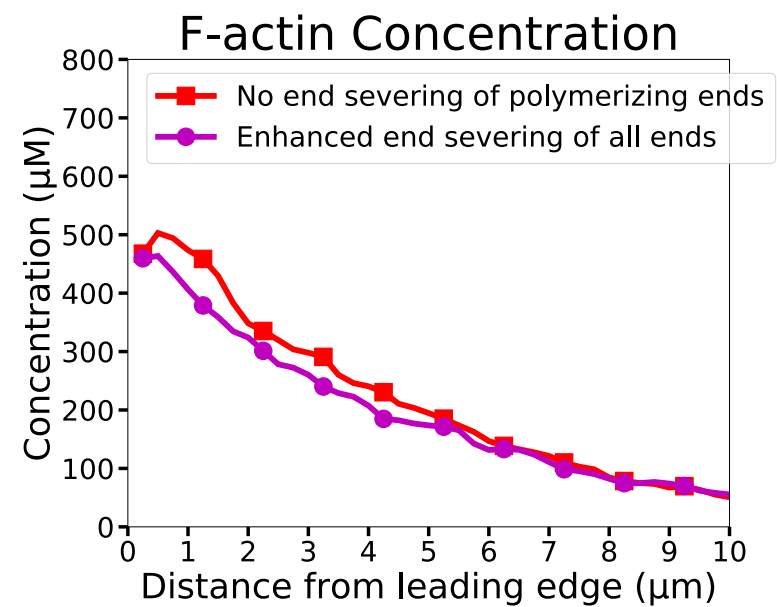

G

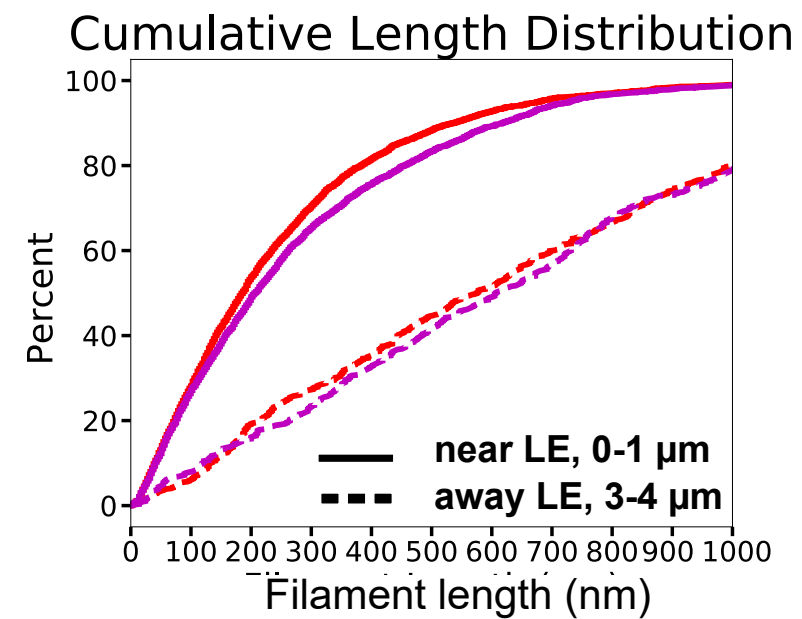

C

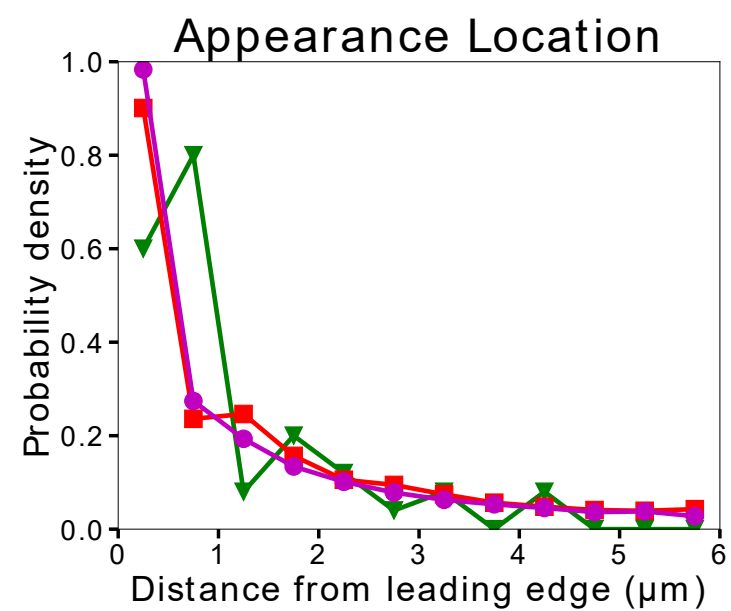

E

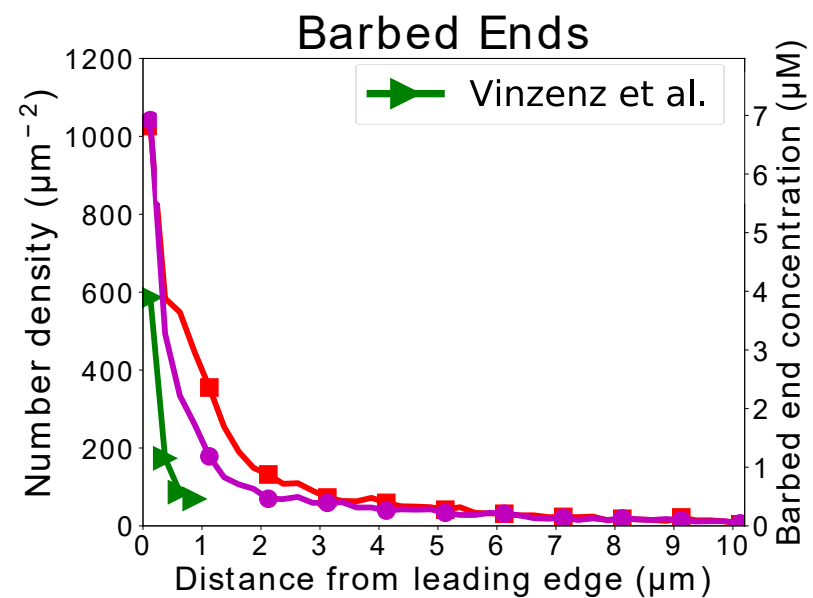

H

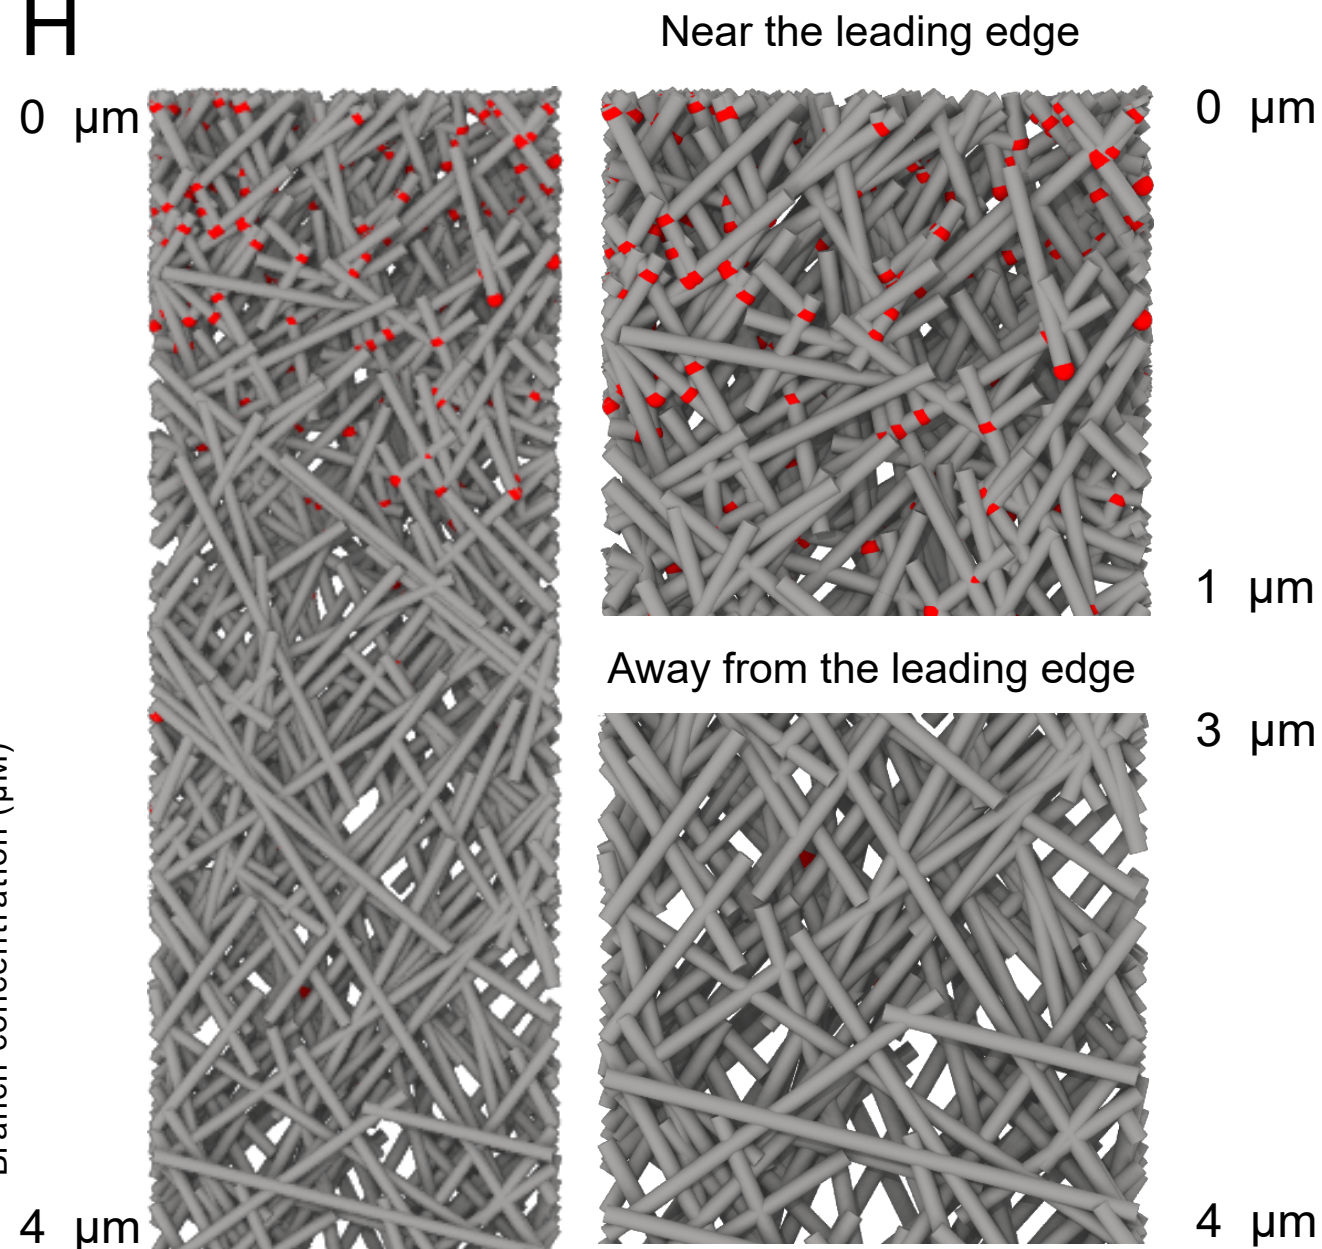

D

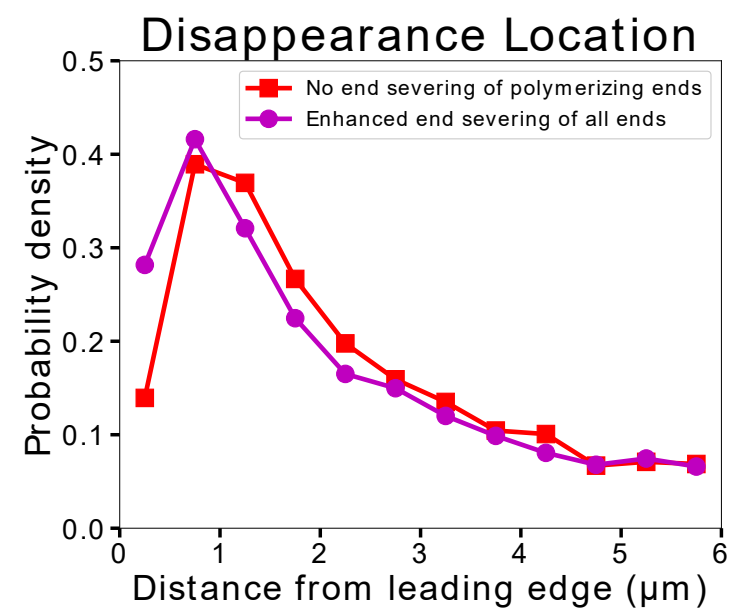

F

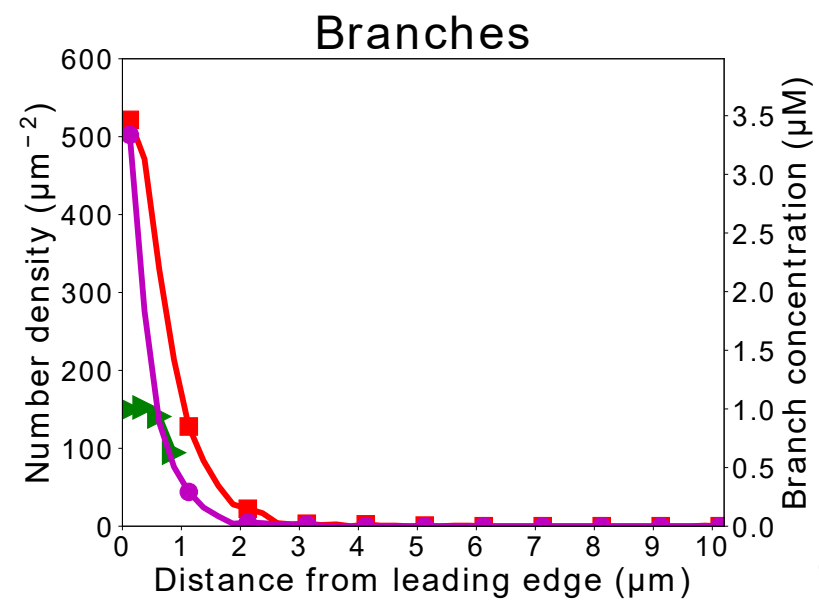

Supplement: supp [file elife-69031-supp-v1.zip]

# With Annealing, Keratocyte Parameters

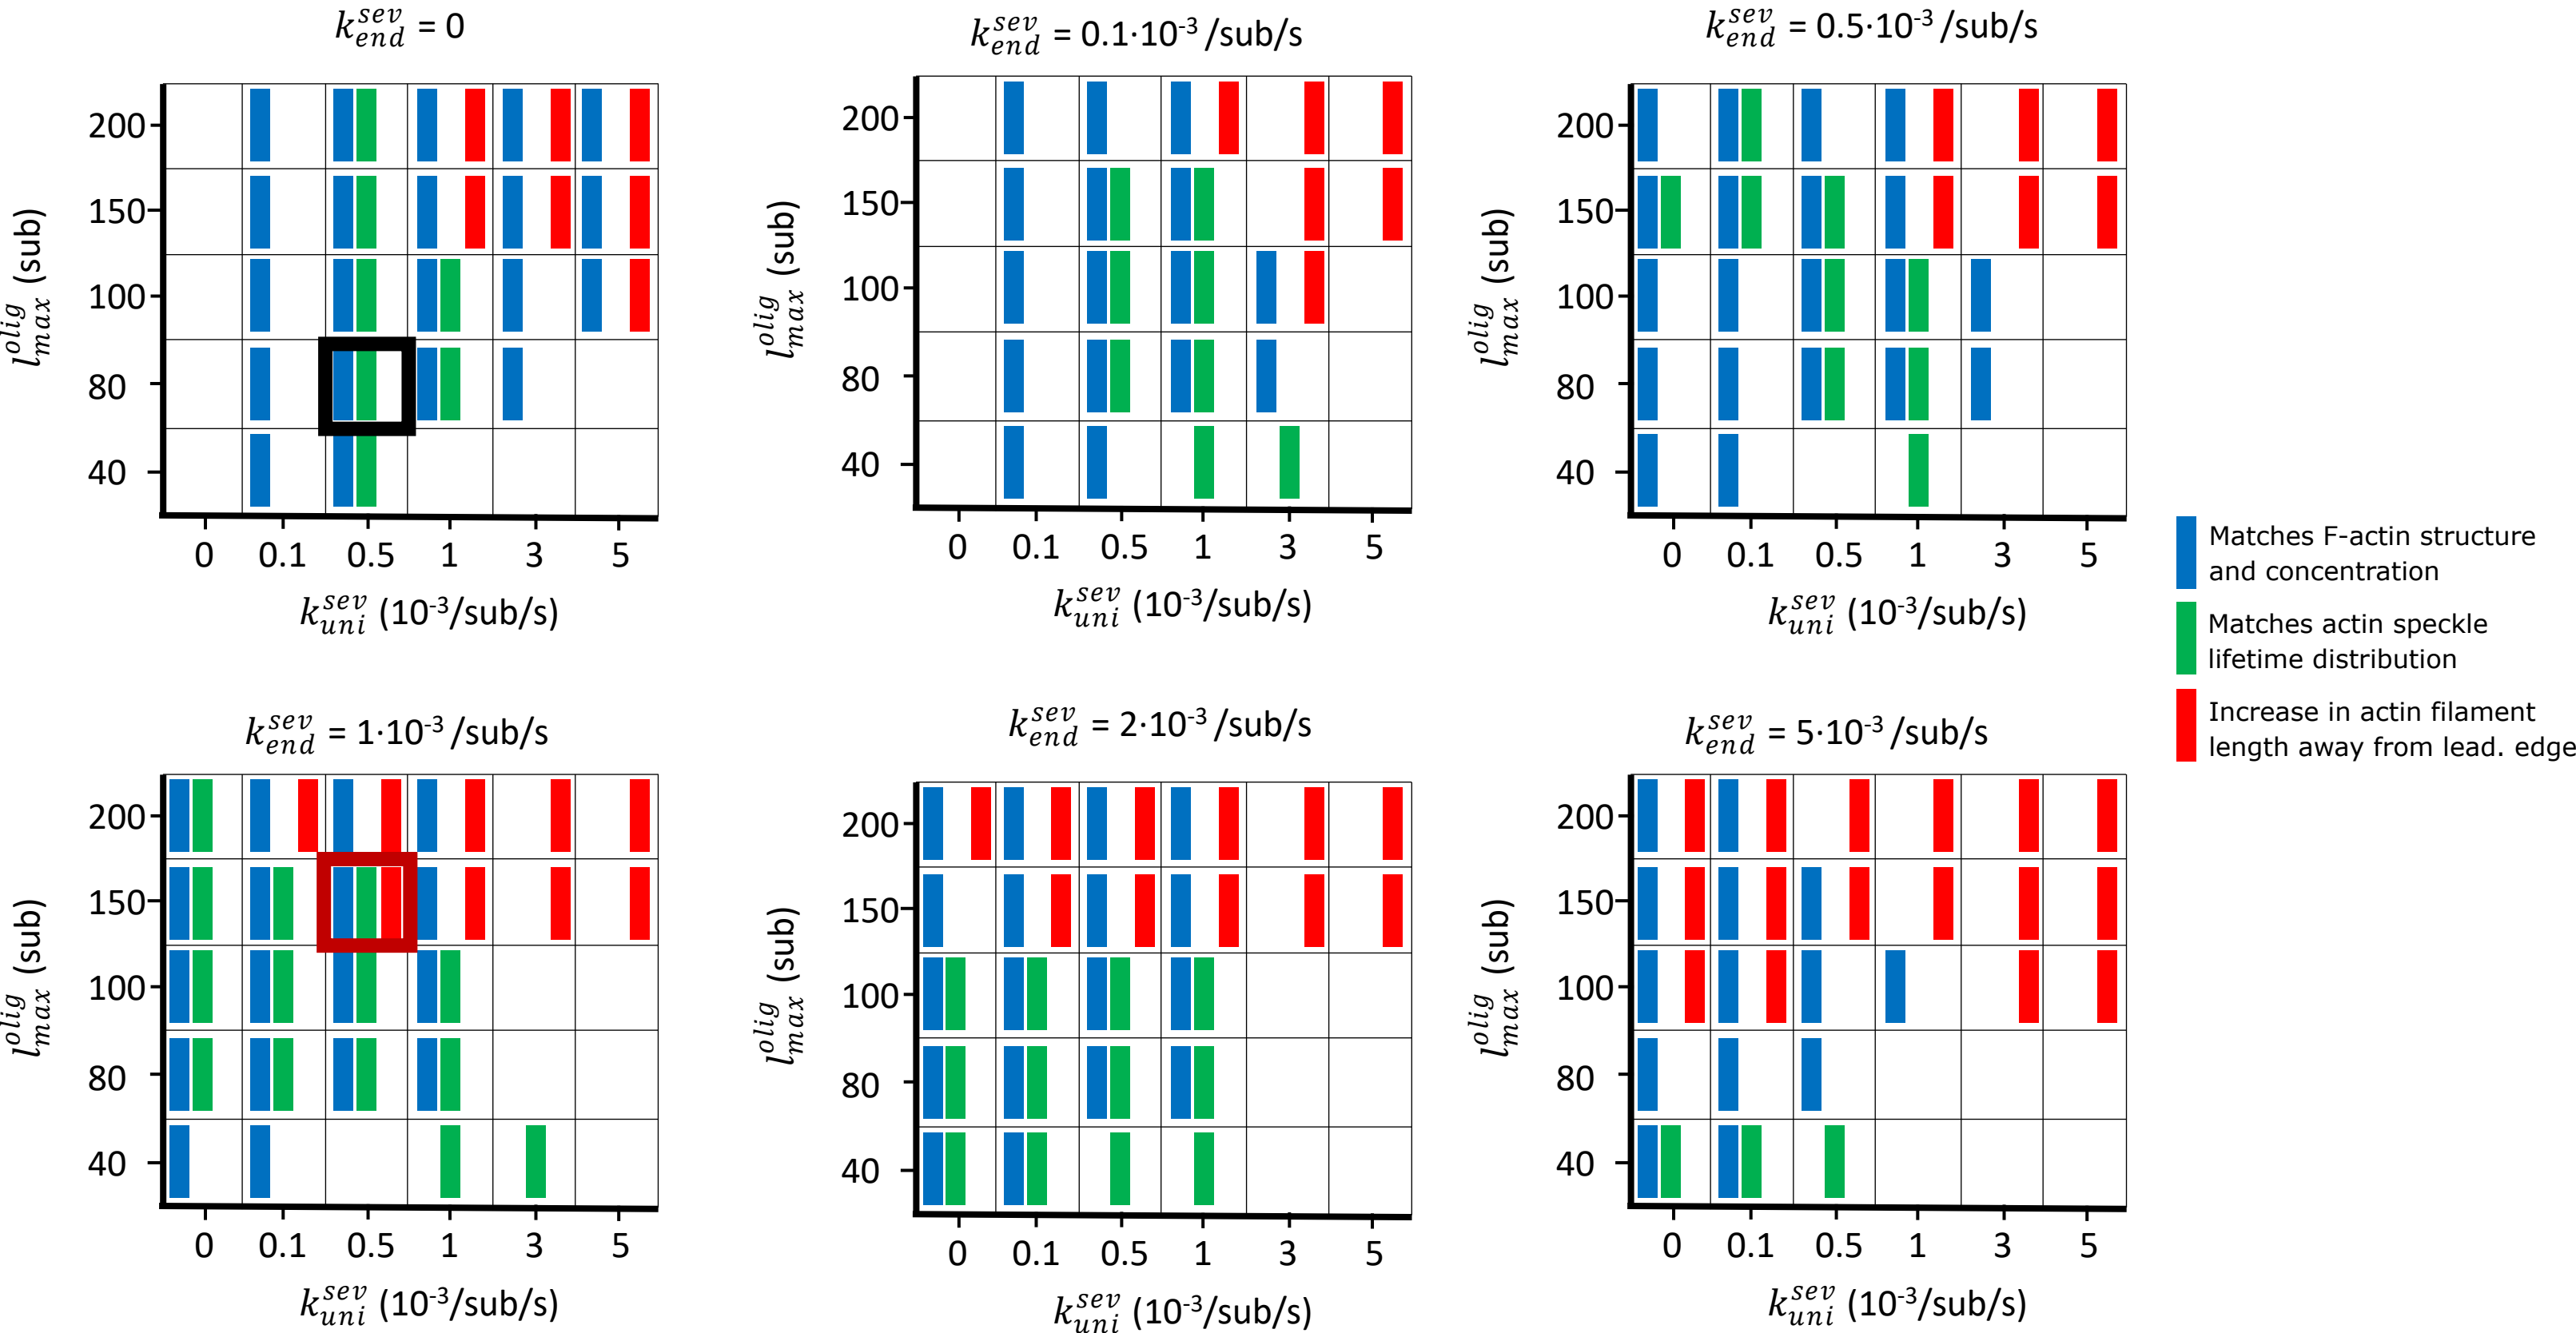

Supplement: supp [file elife-69031-supp-v1.zip]

A

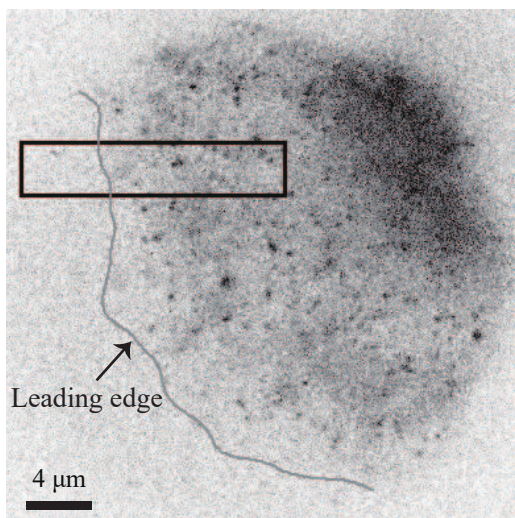

B

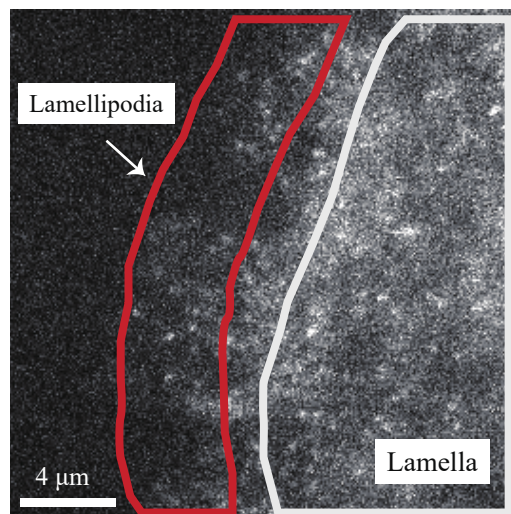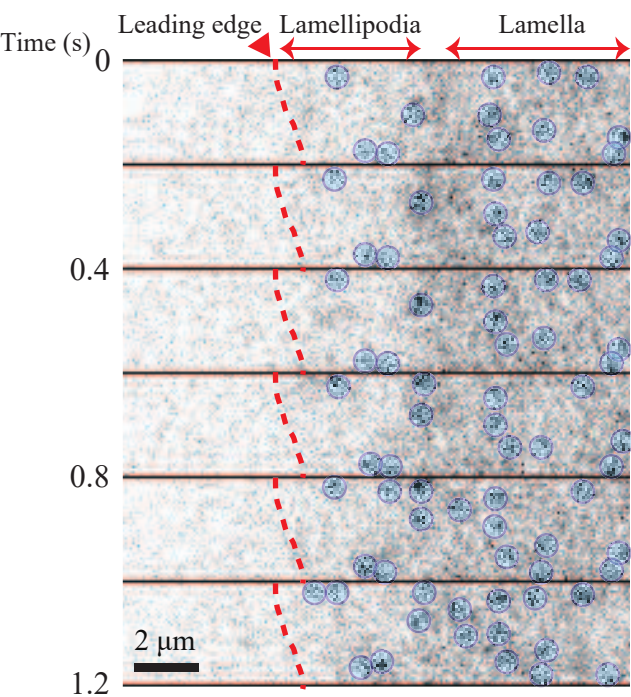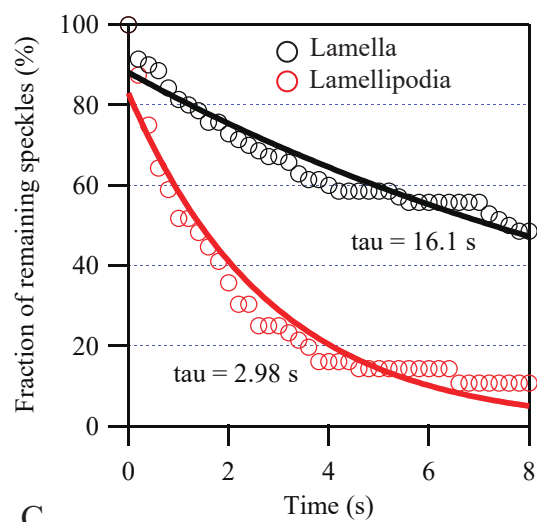

C

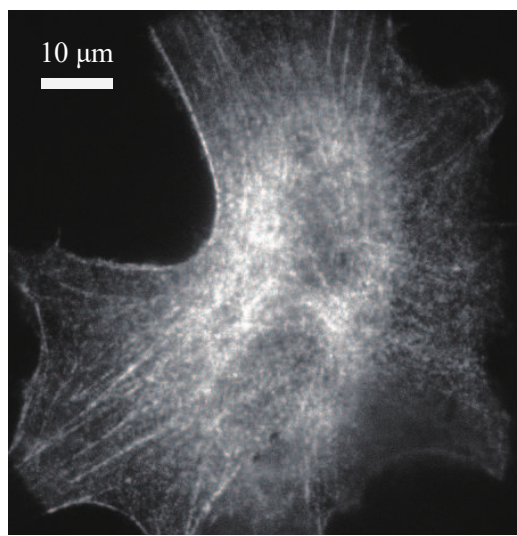

Supplement: supp [file elife-69031-supp-v1.zip]

A

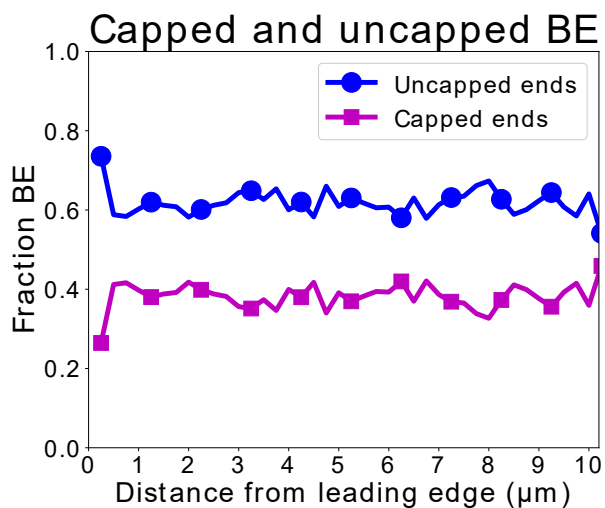

B

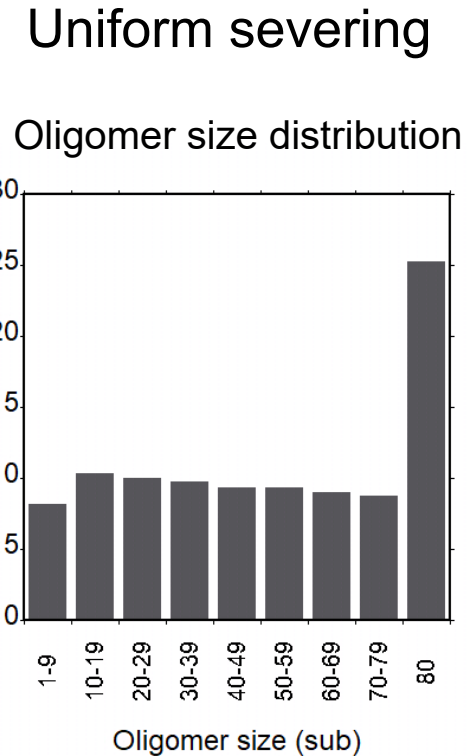

C

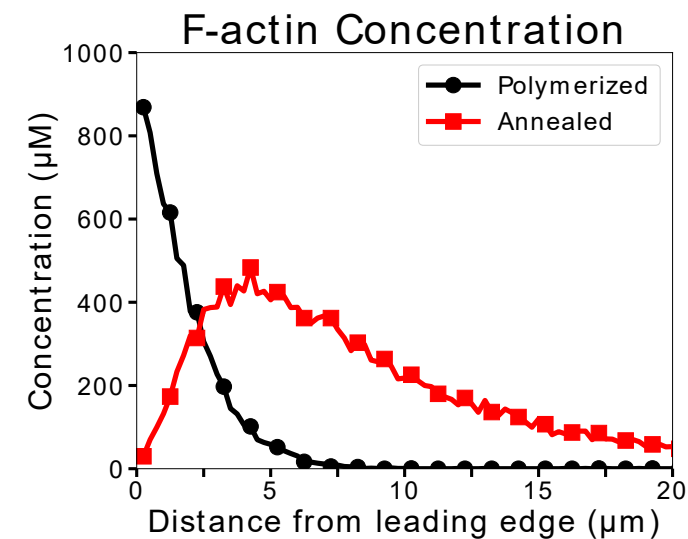

D

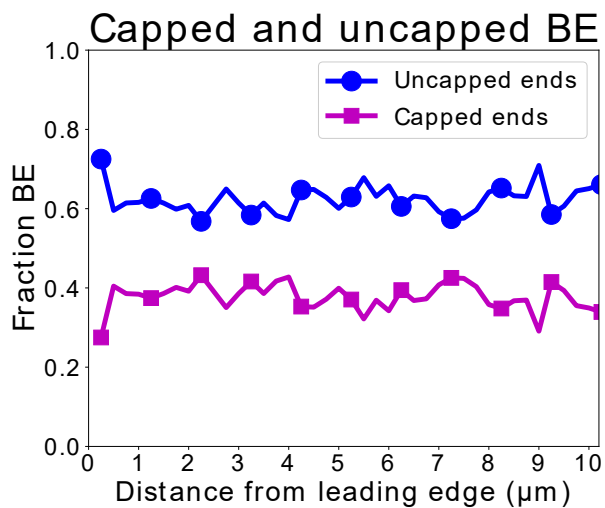

E

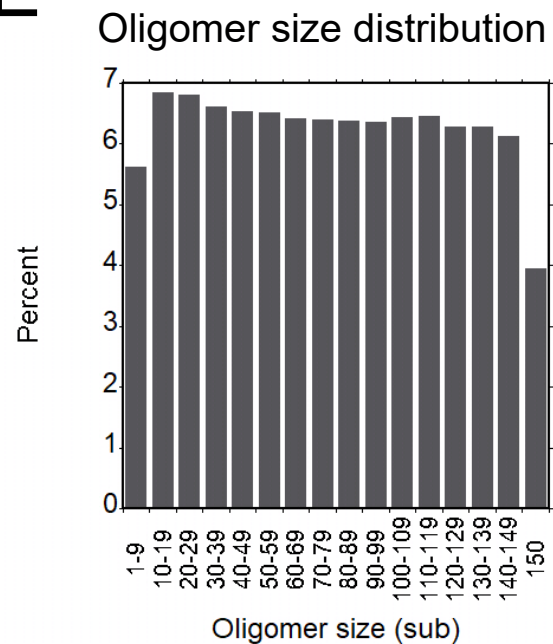

F

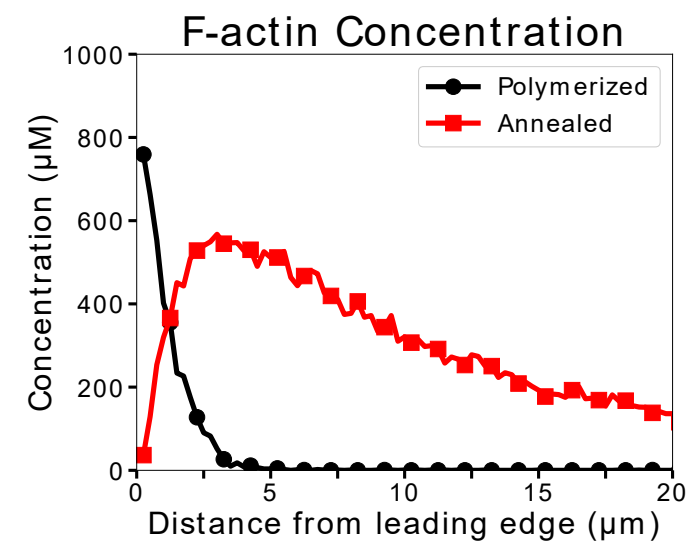

Supplement: supp [file elife-69031-supp-v1.zip]

A

## No Annealing, Keratocyte Parameters

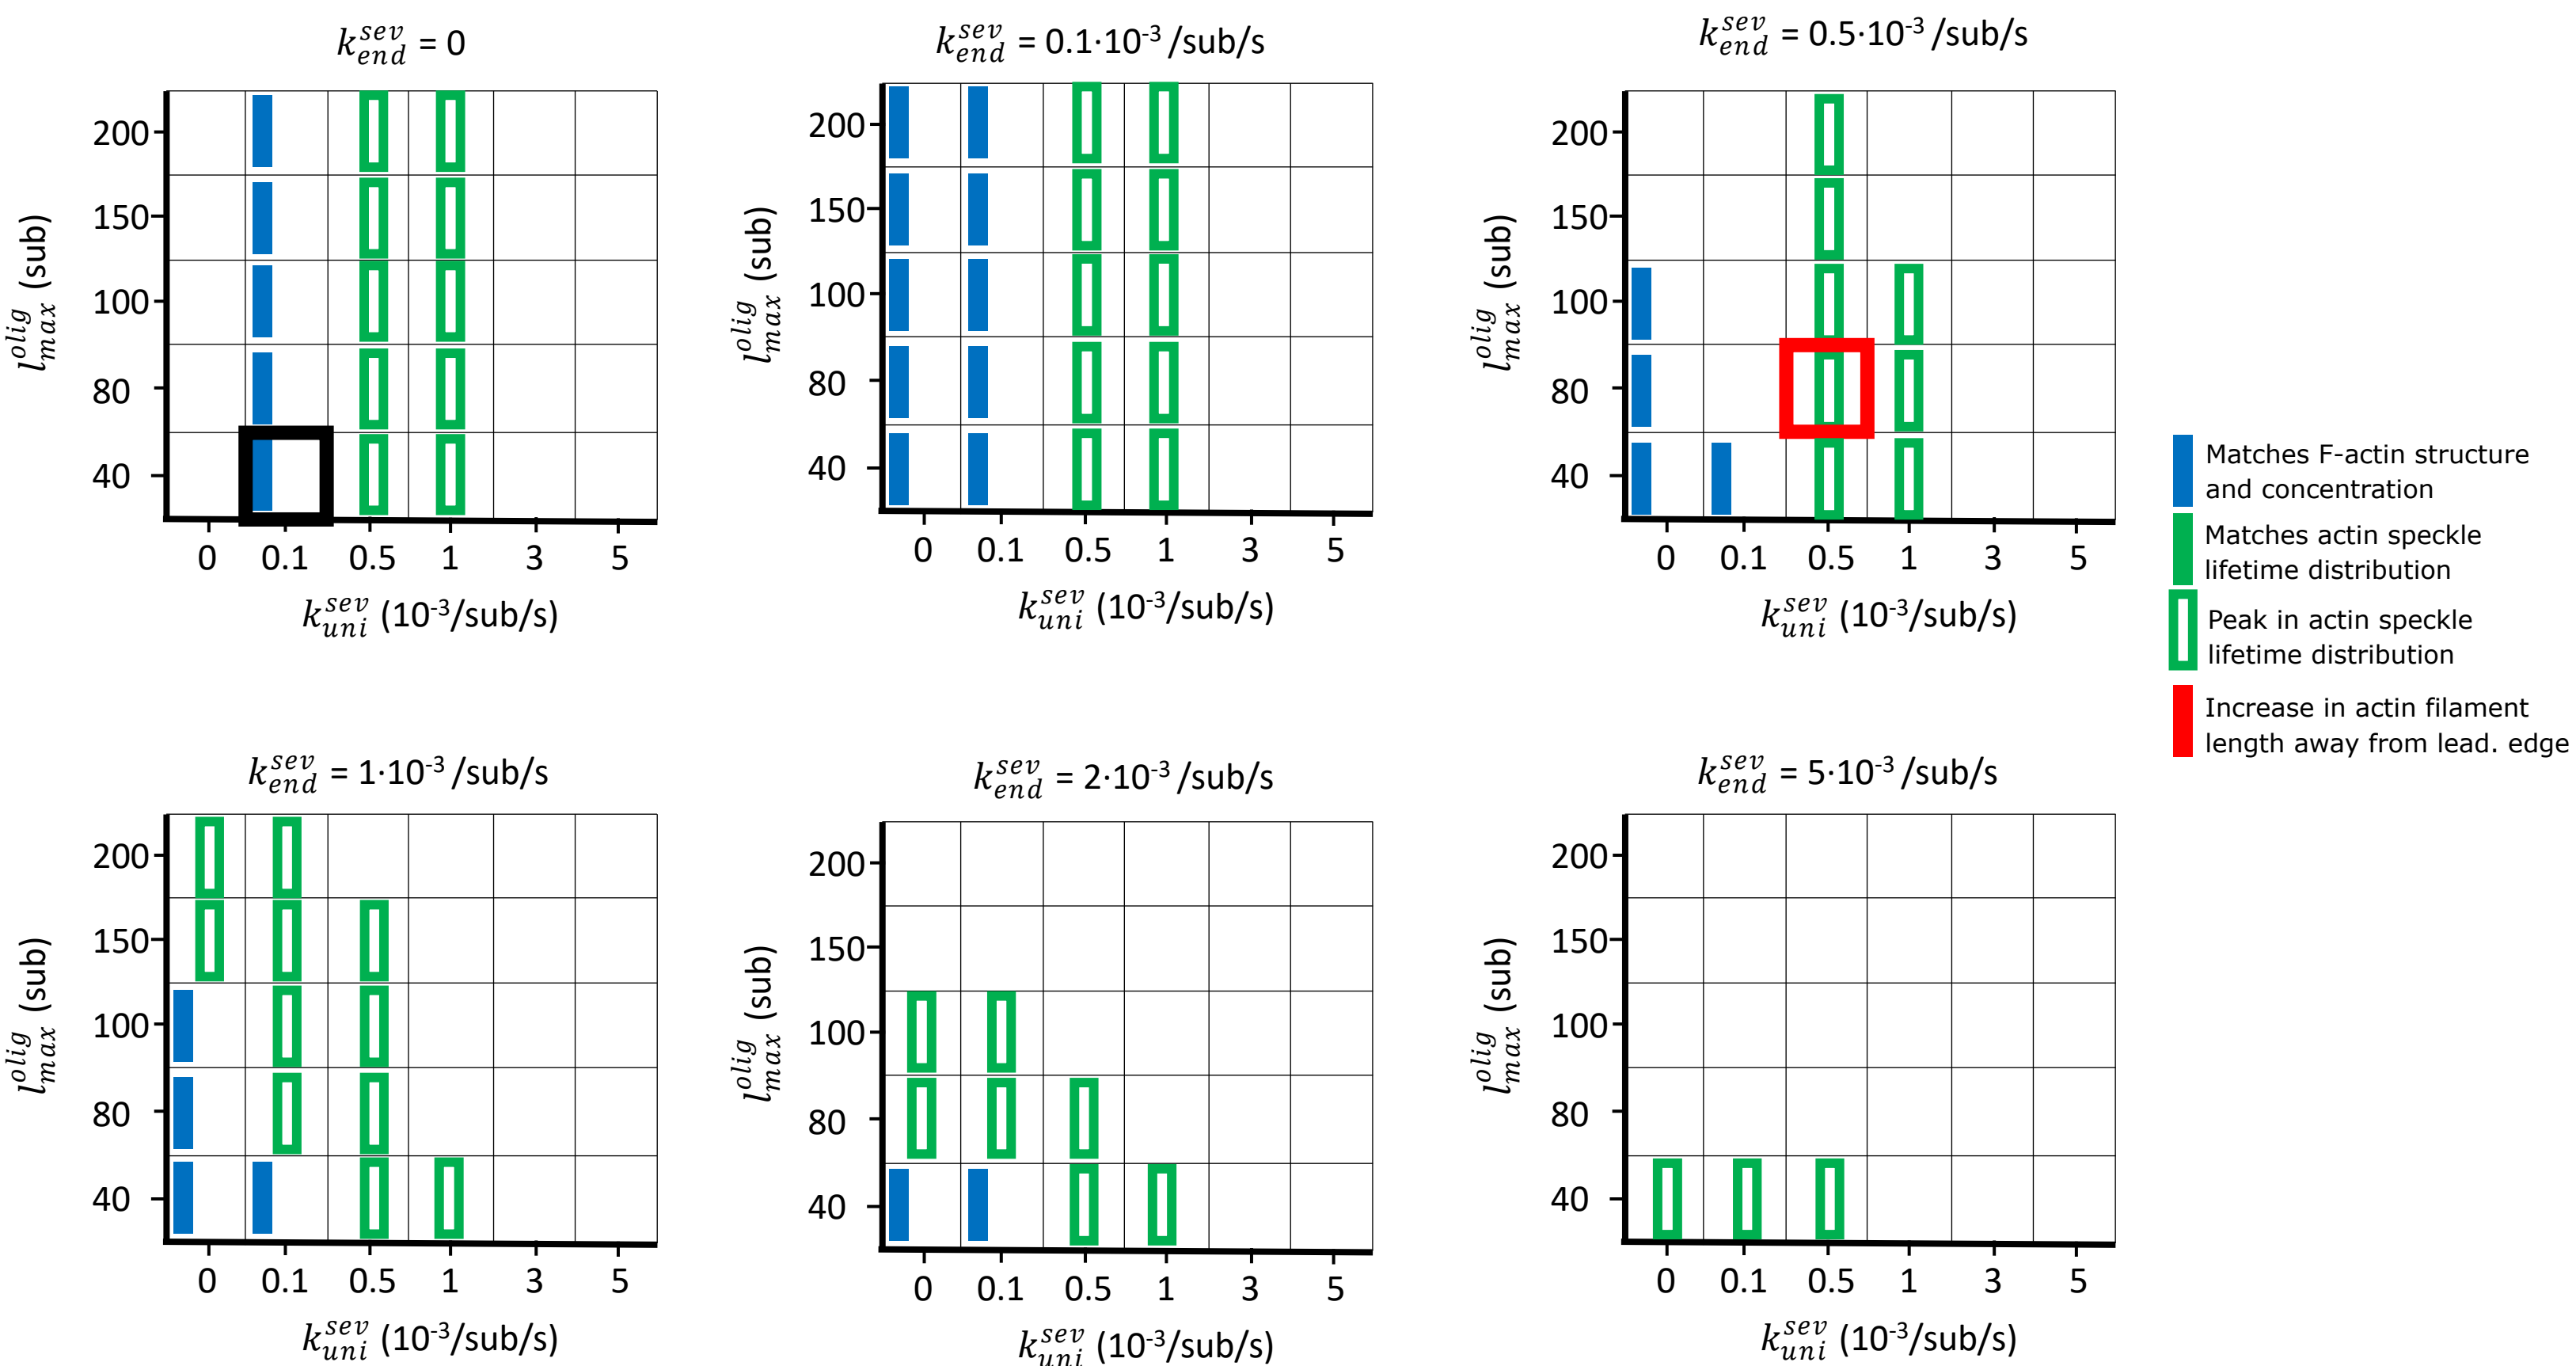

B

## No Annealing, XTC Parameters

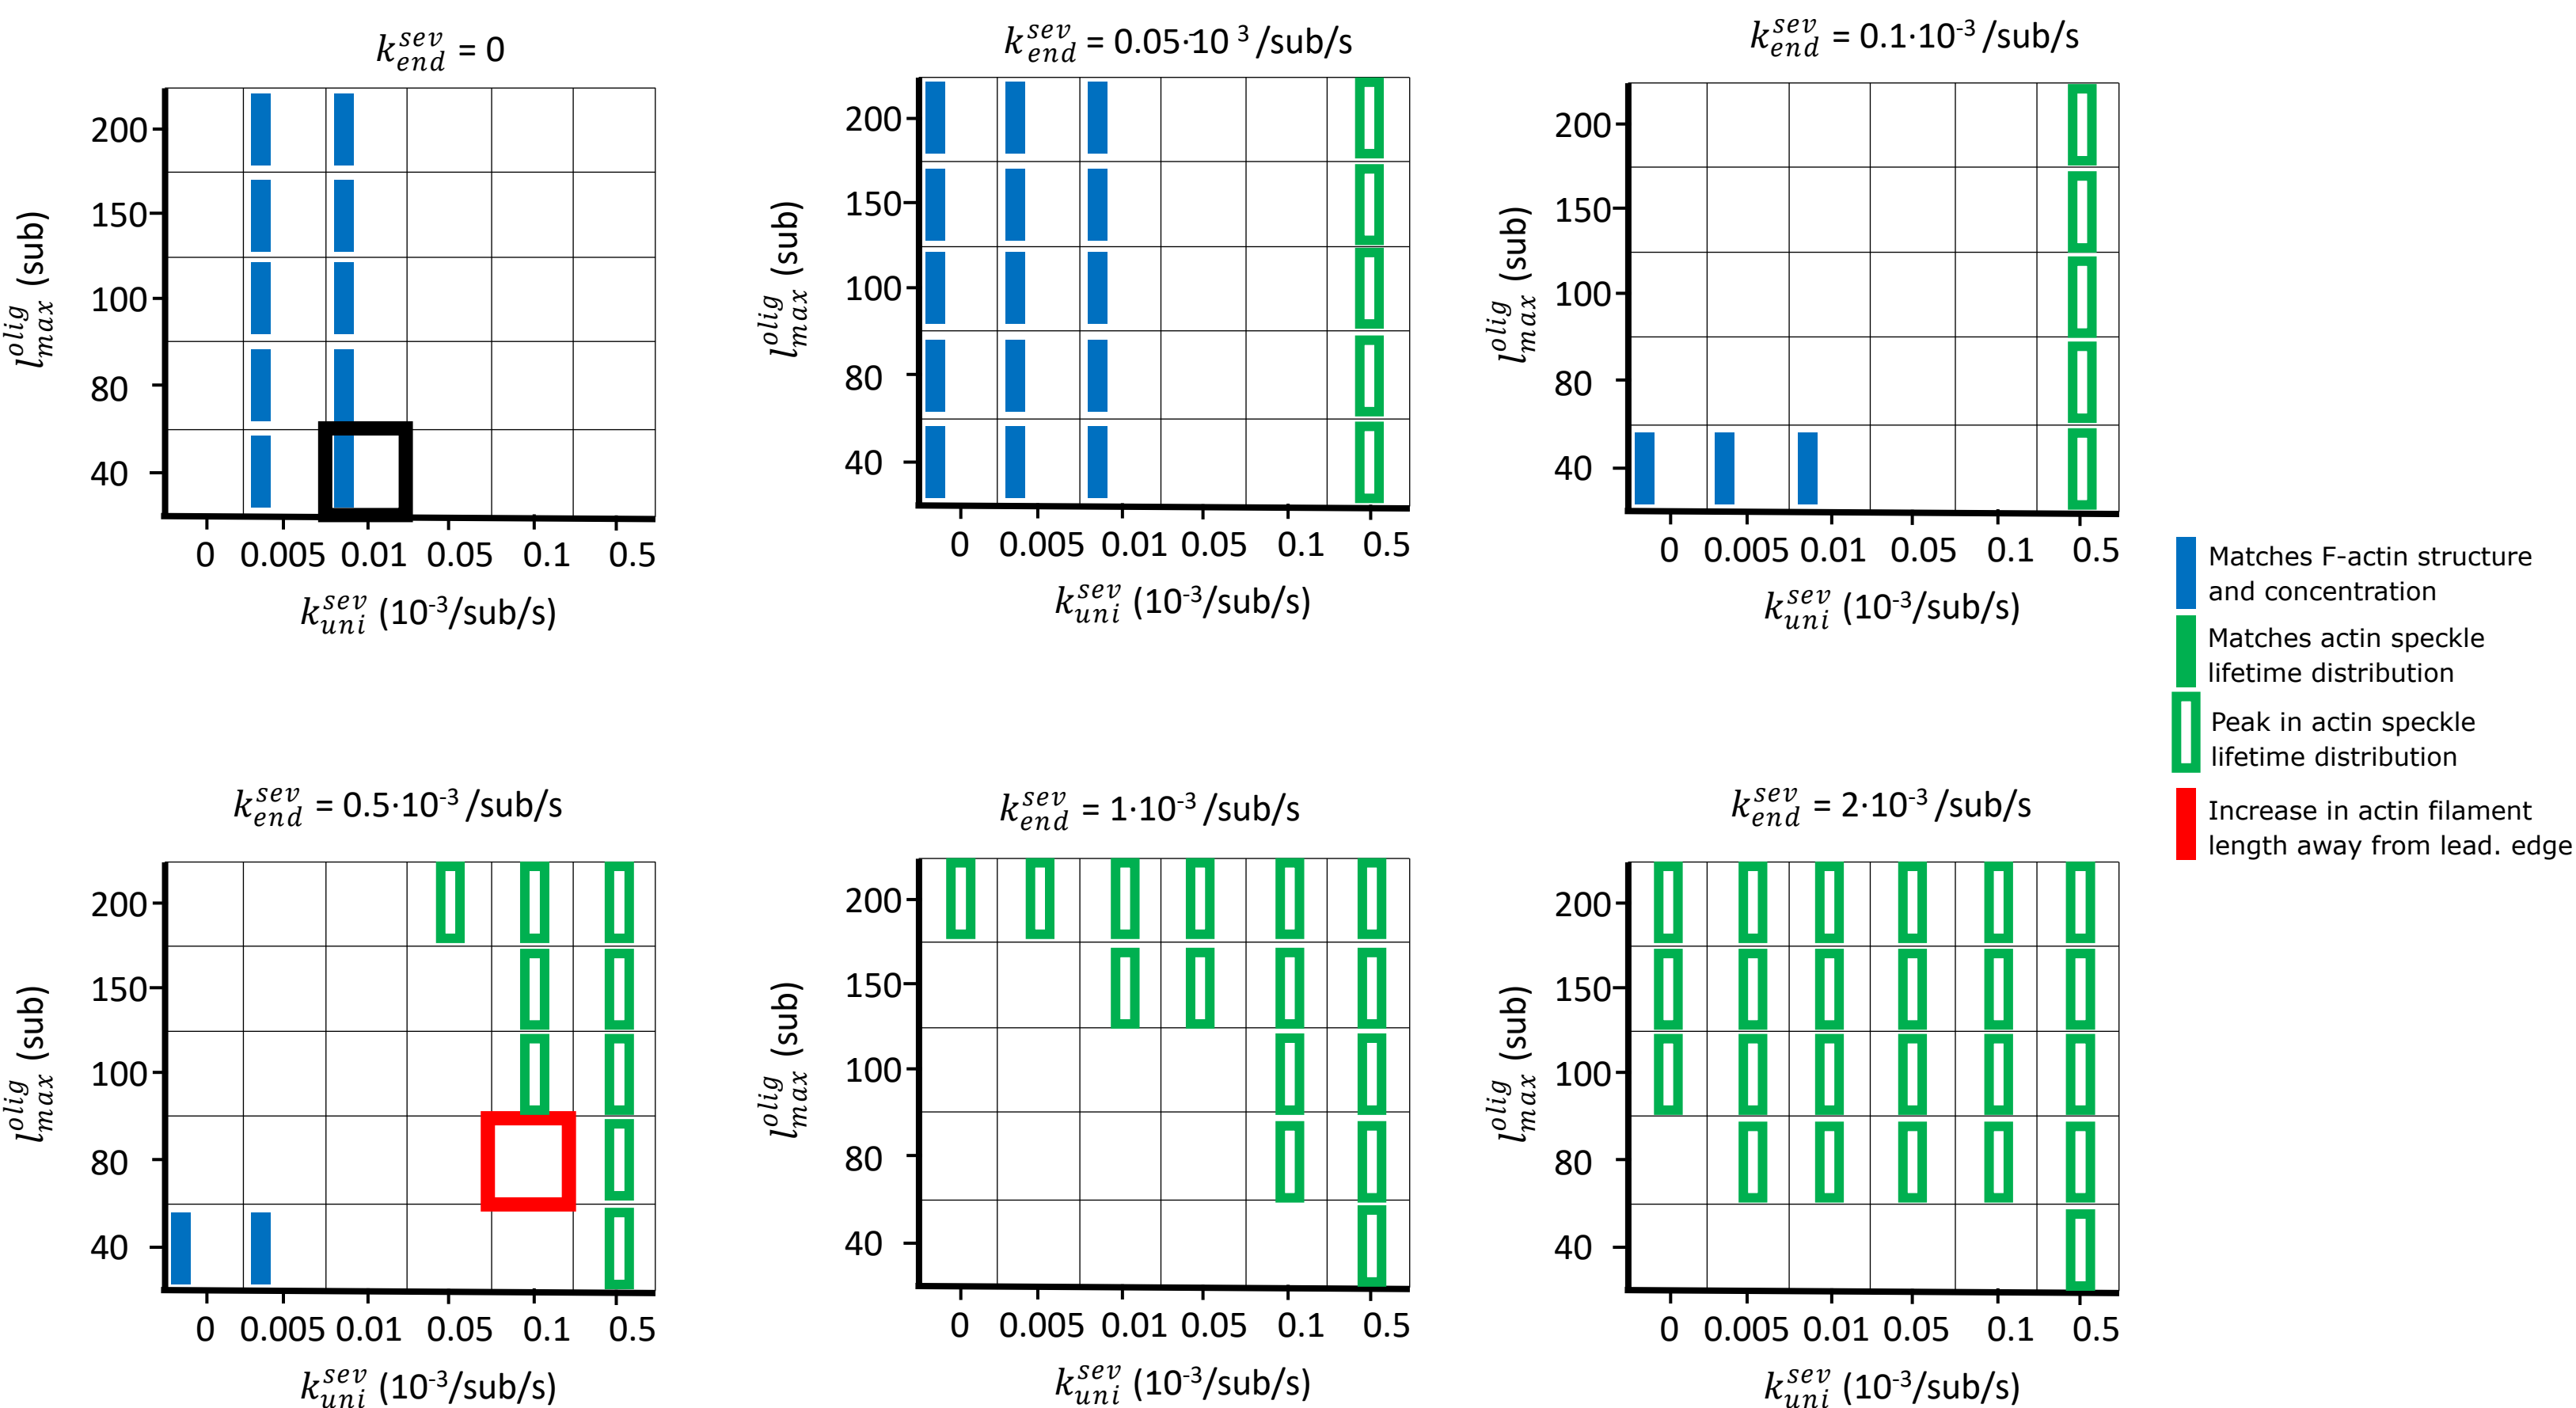

Supplement: supp [file elife-69031-supp-v1.zip]

A

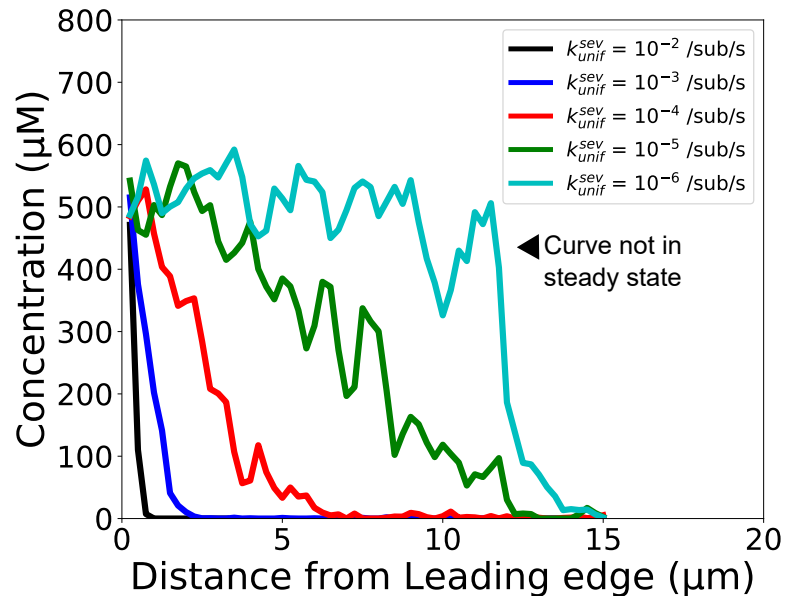

B

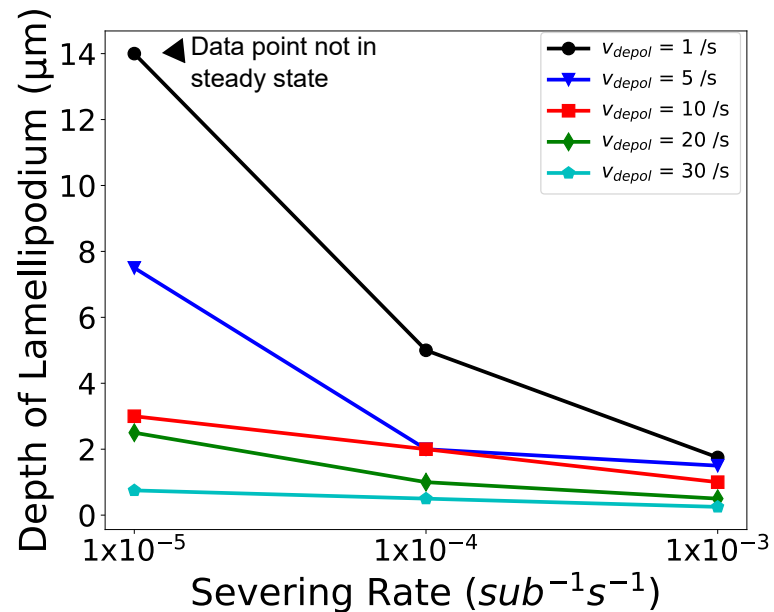

Supplement: supp [file elife-69031-supp-v1.zip]

**A**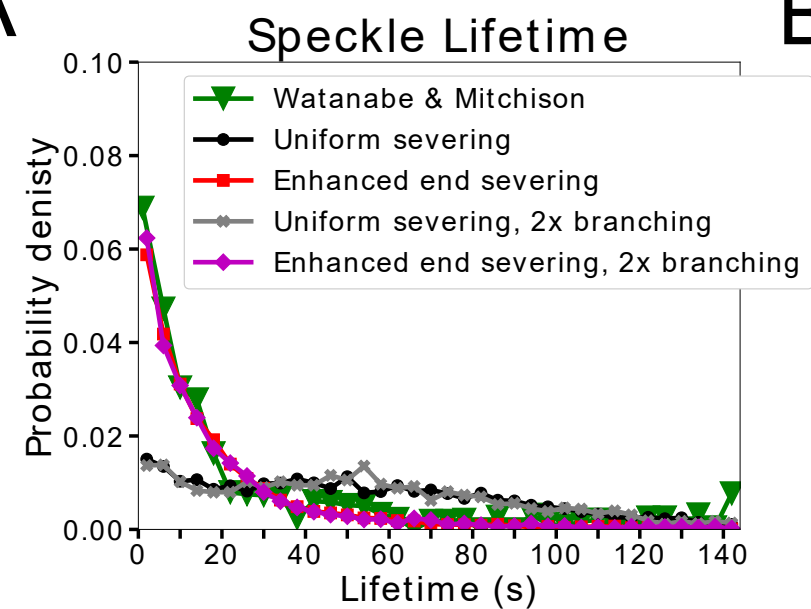**B**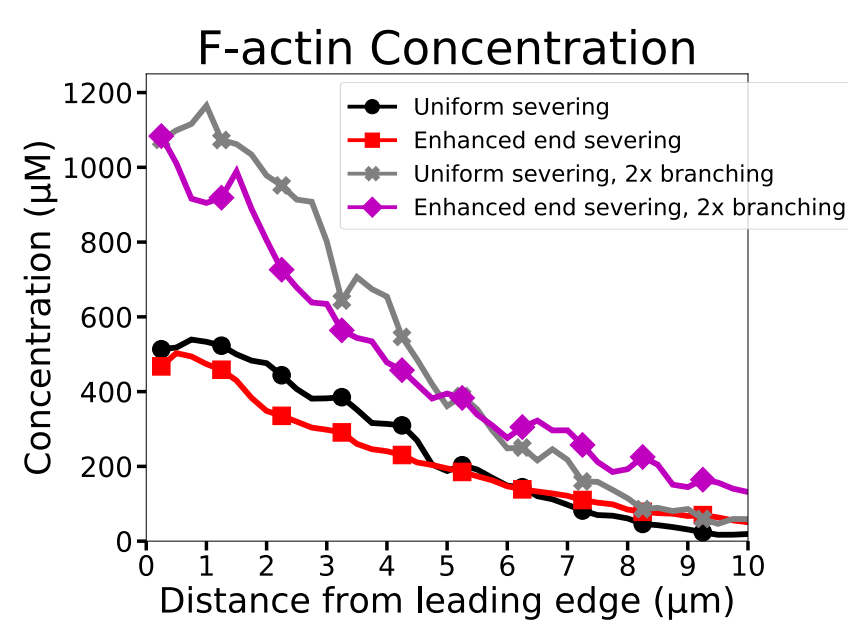**G**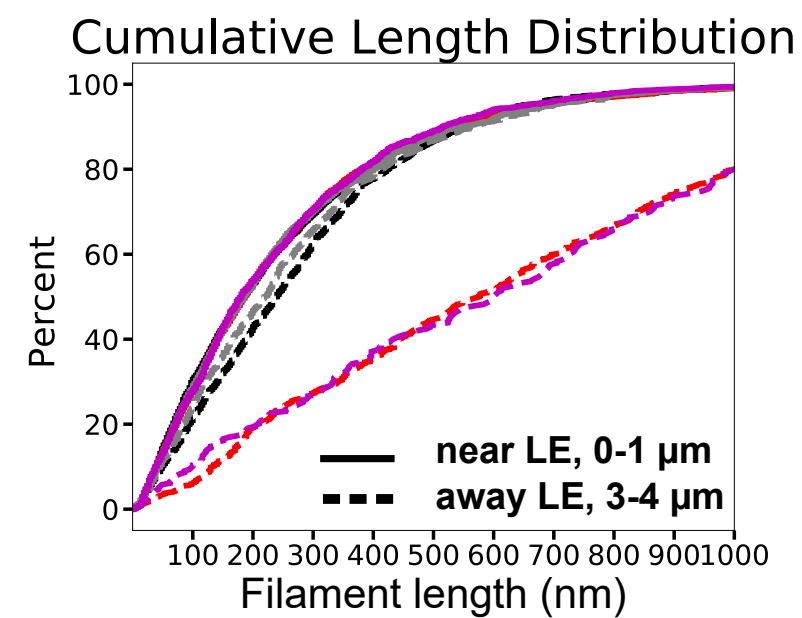**C**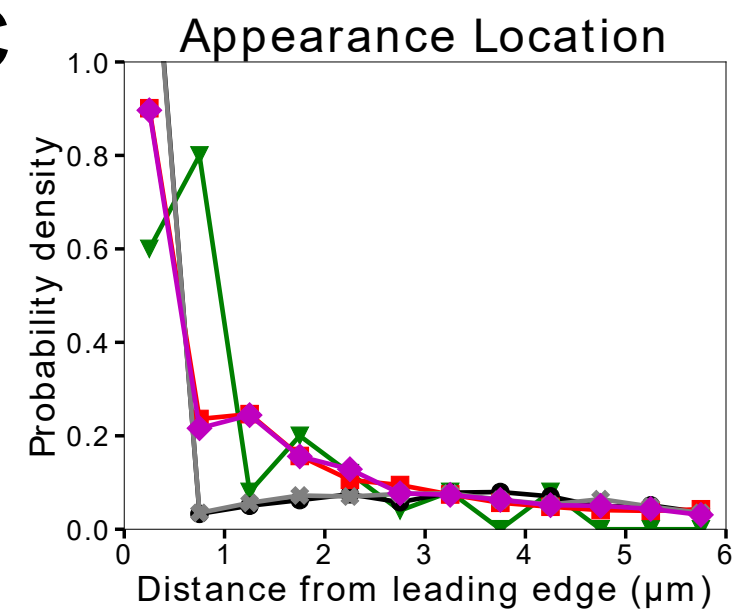**E**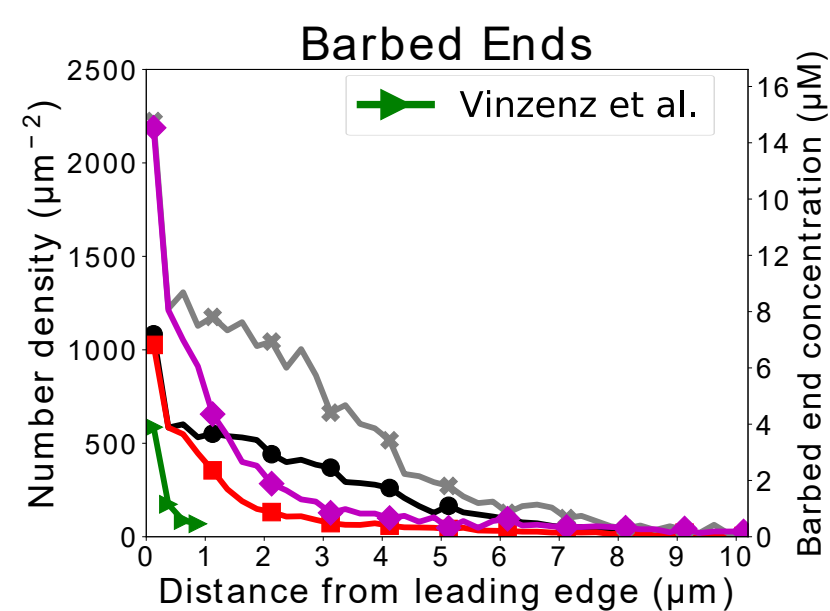**H**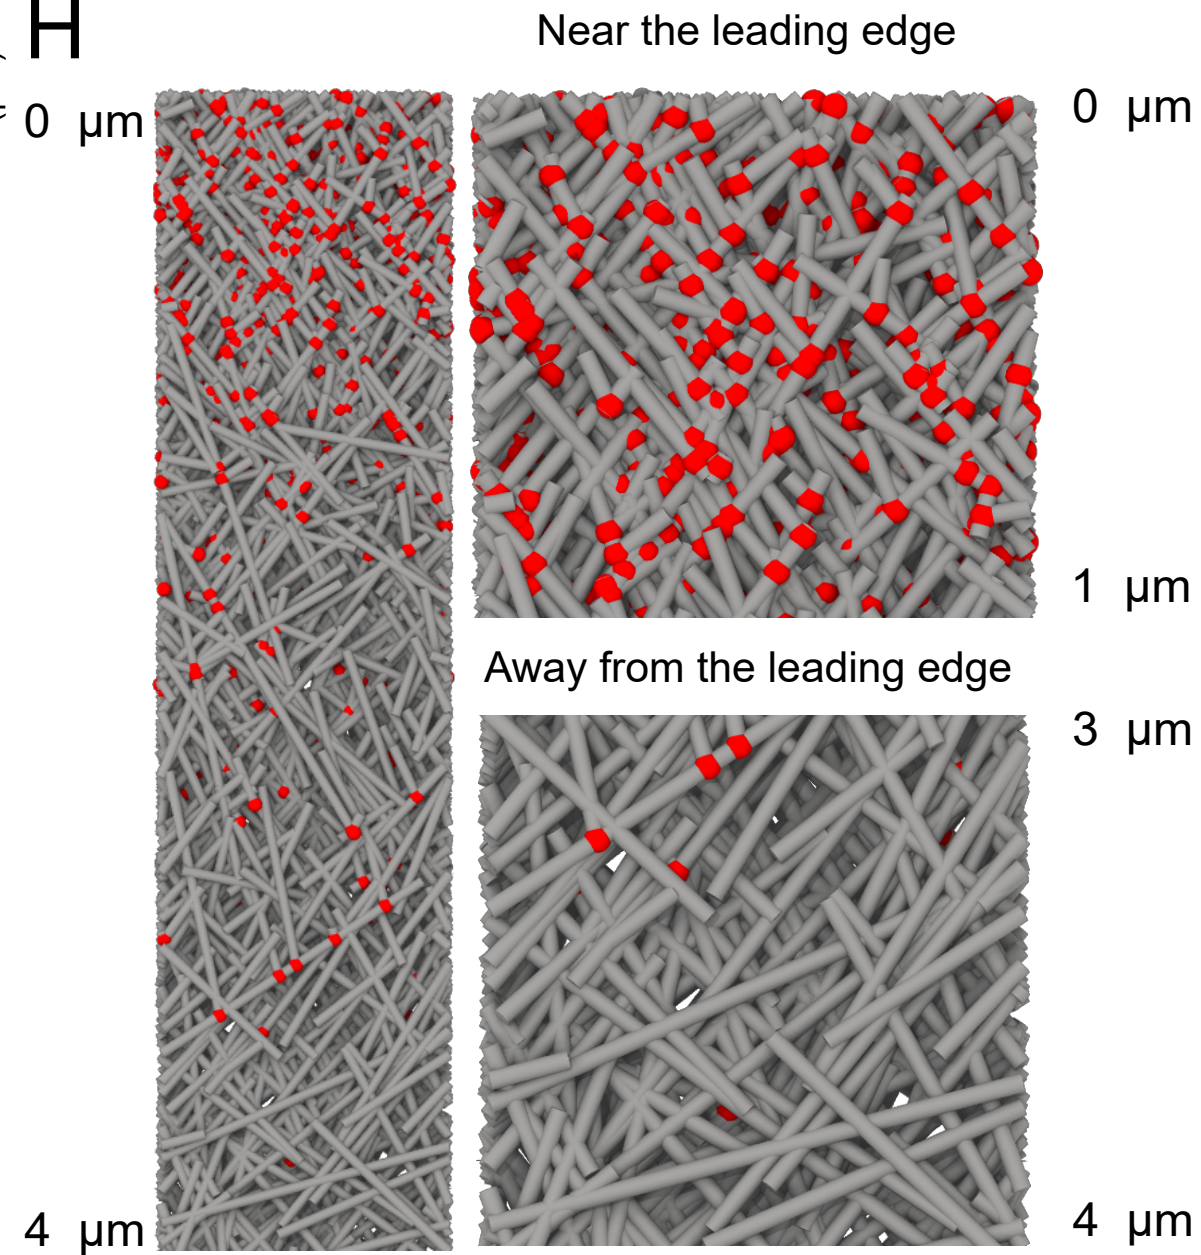**D**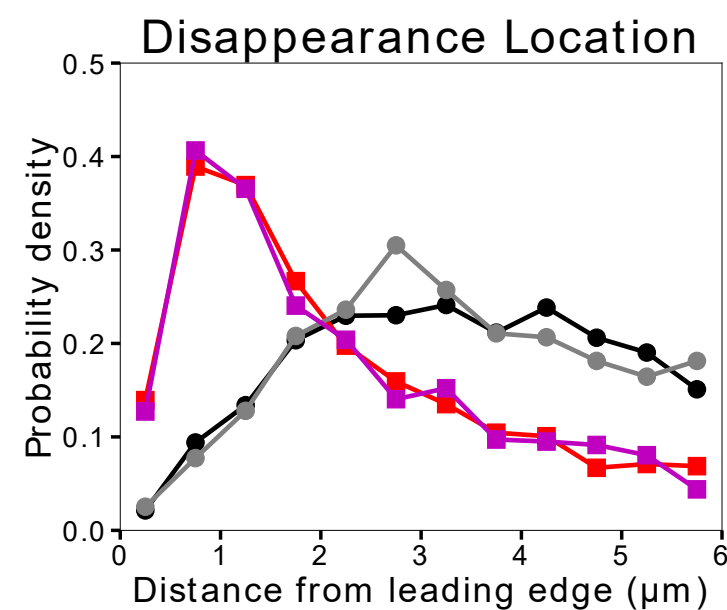**F**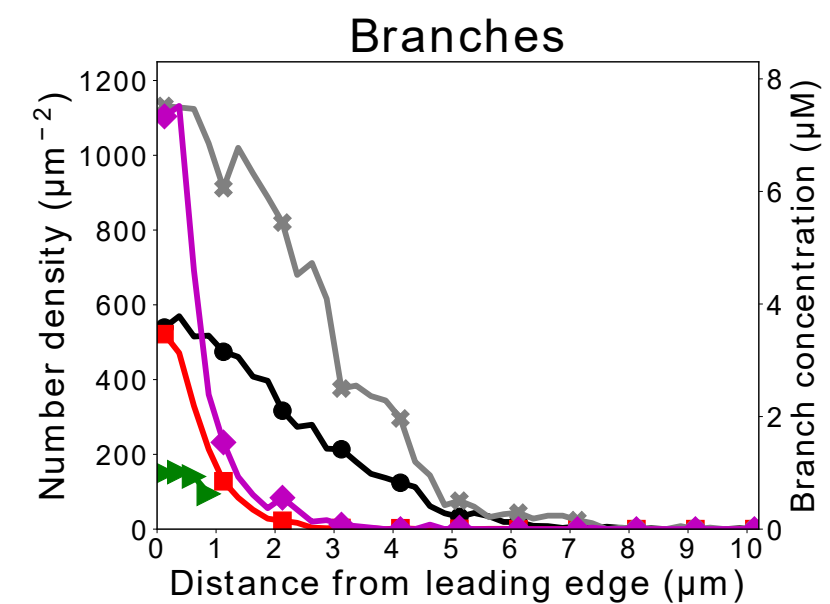

Supplement: supp [file elife-69031-supp-v1.zip]

# No Annealing, Keratocyte Parameters

A

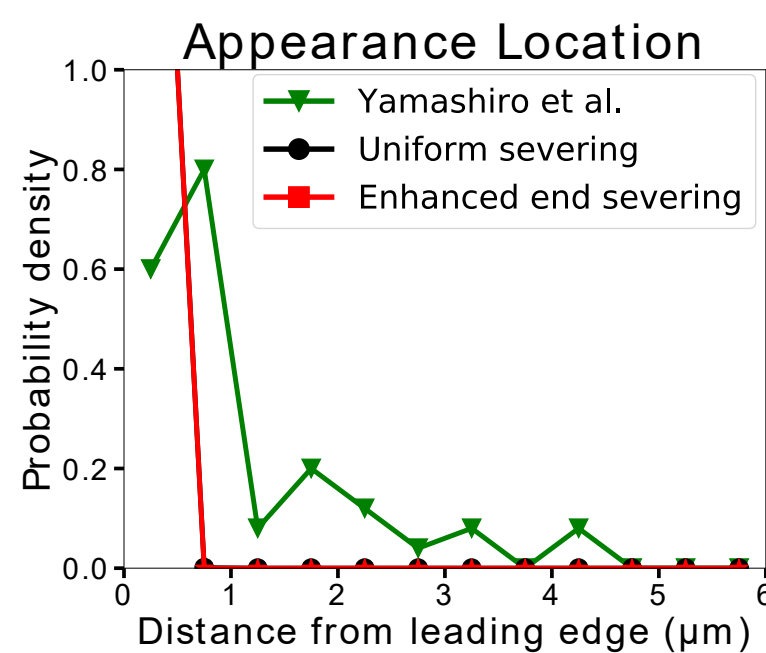

C

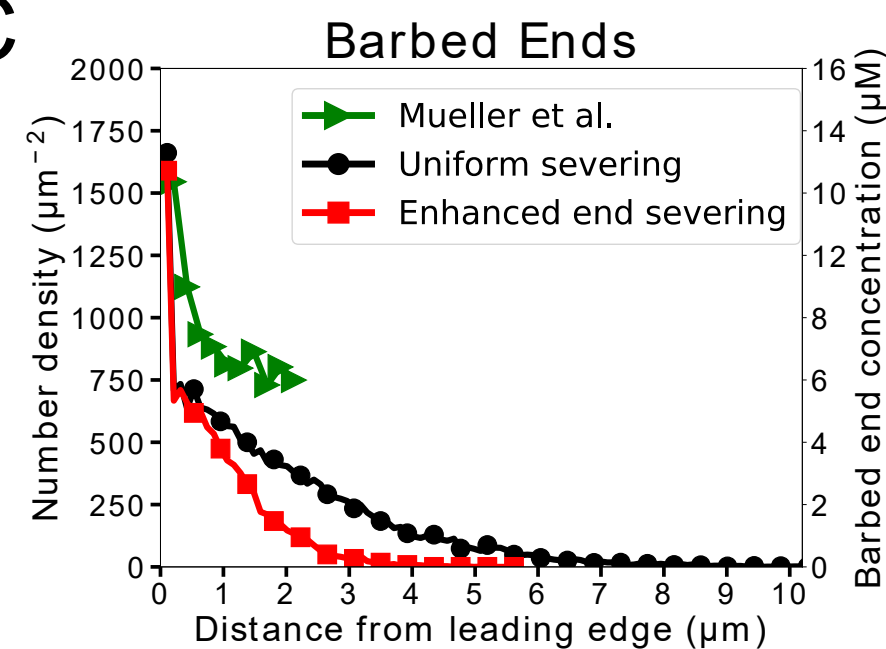

E

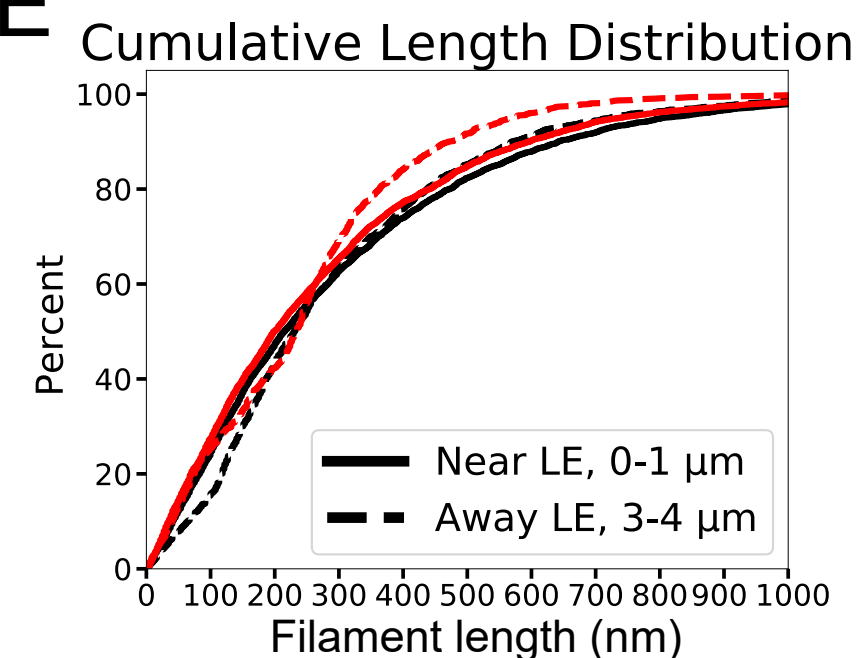

B

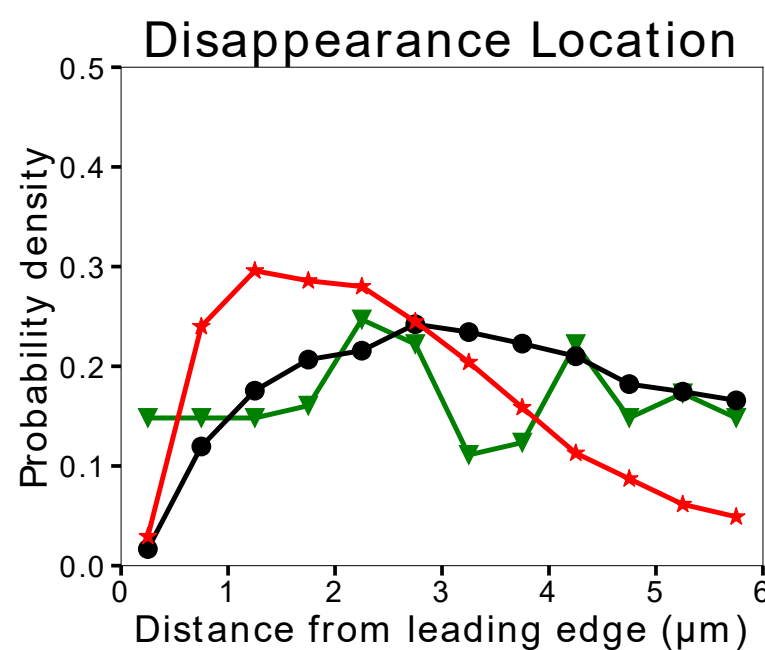

D

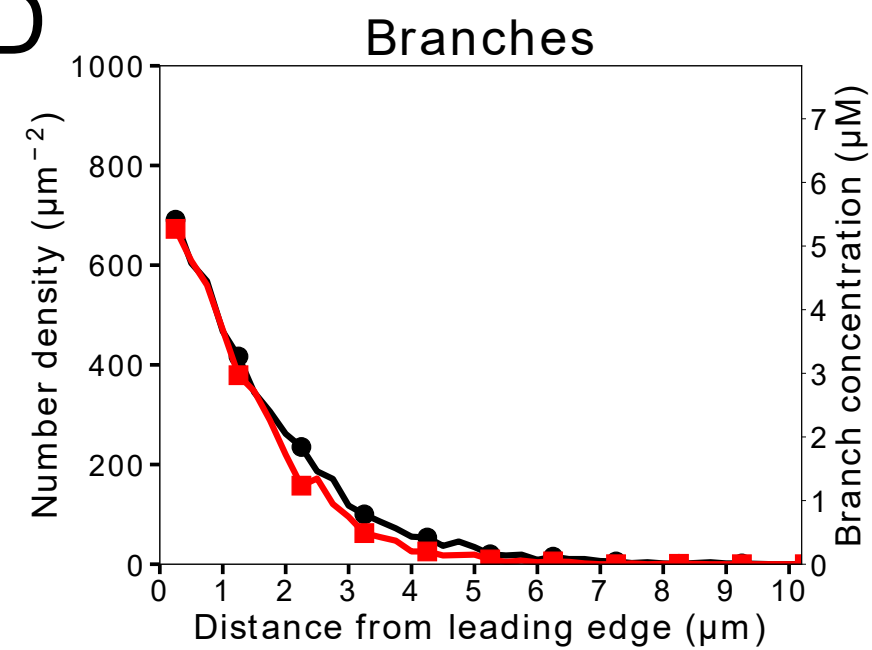

# No Annealing, XTC Parameters

F

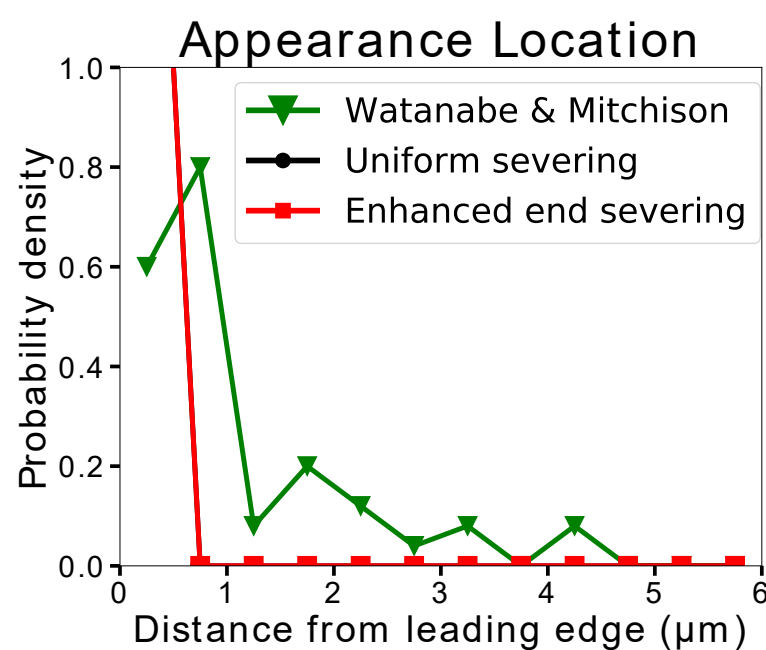

H

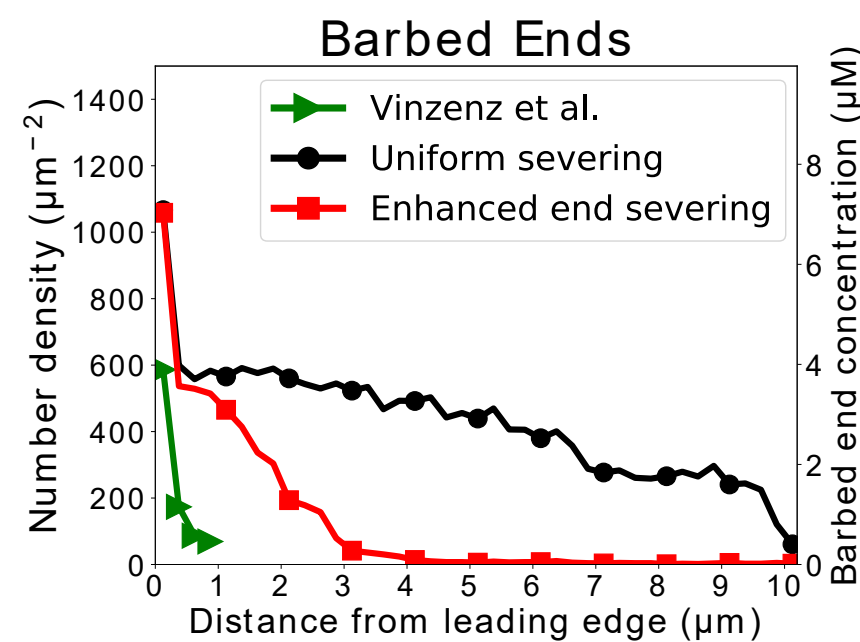

J

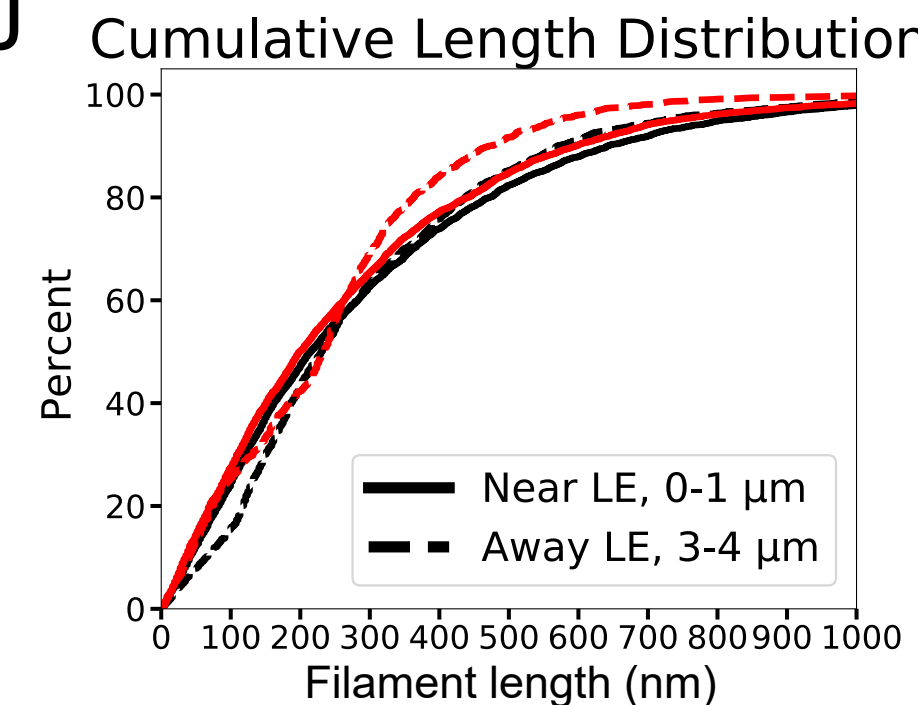

G

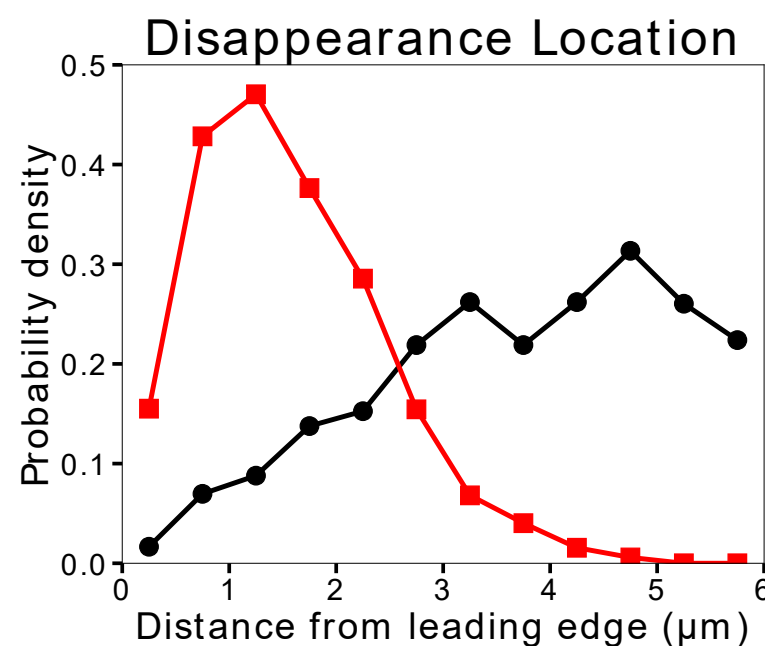

I

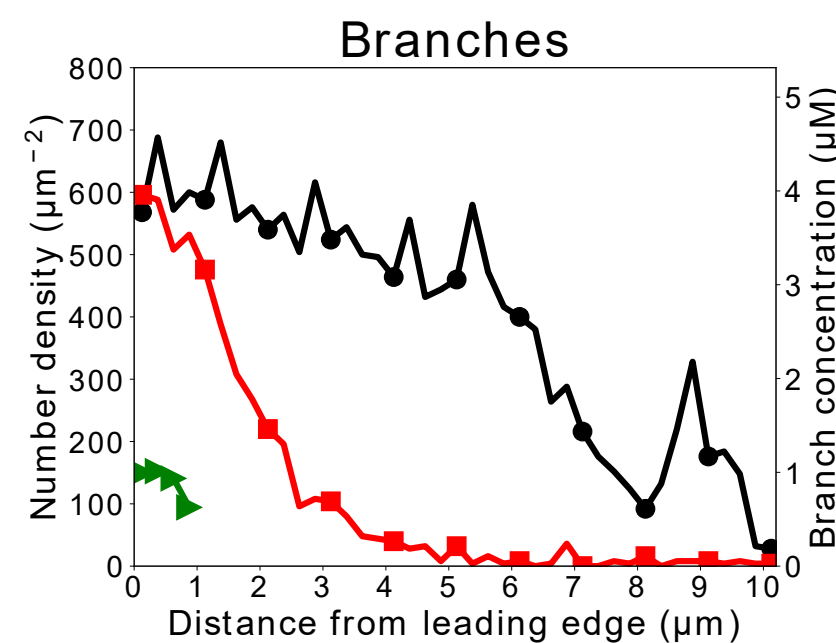

Supplement: supp [file elife-69031-supp-v1.zip]

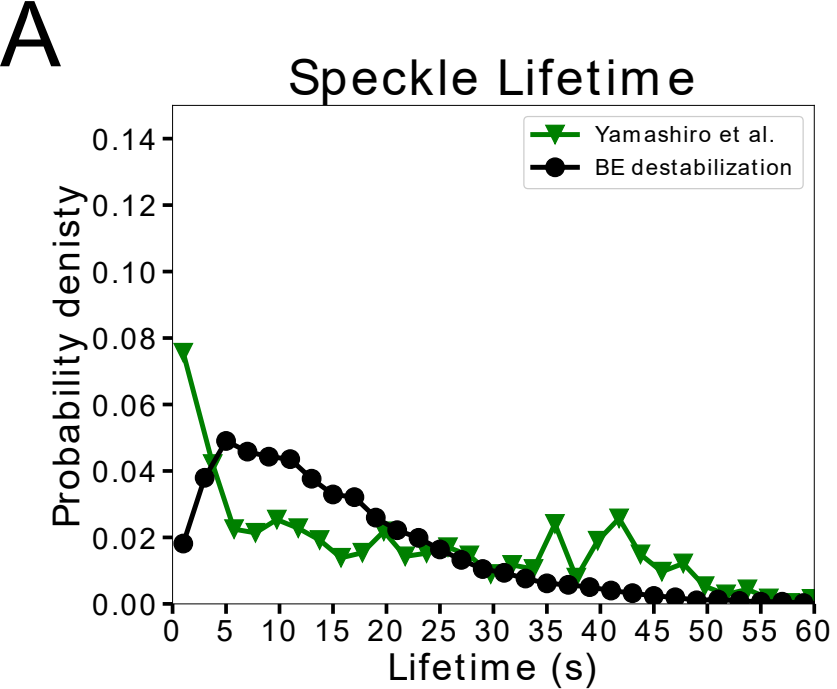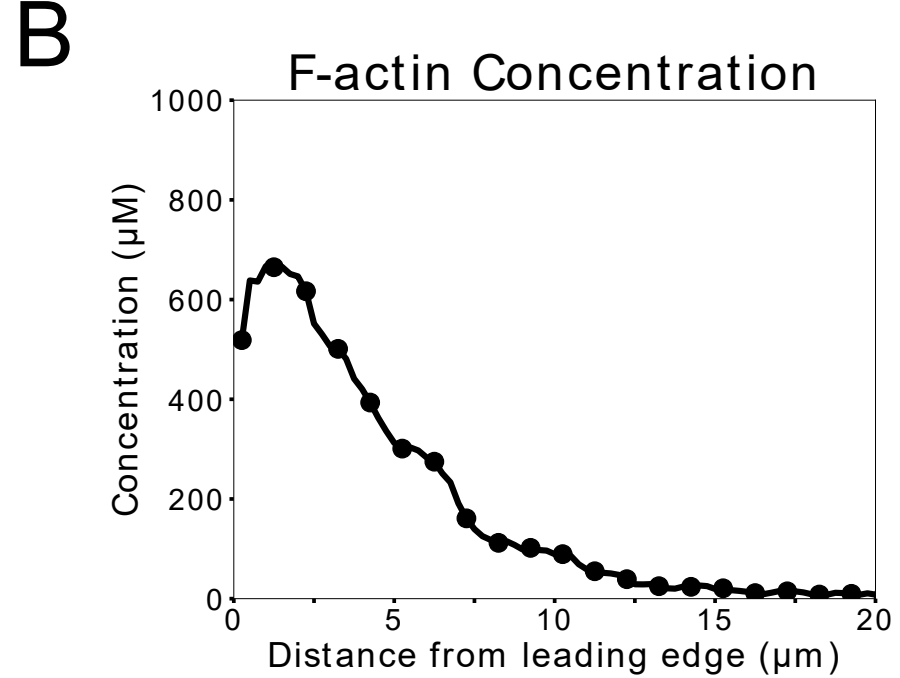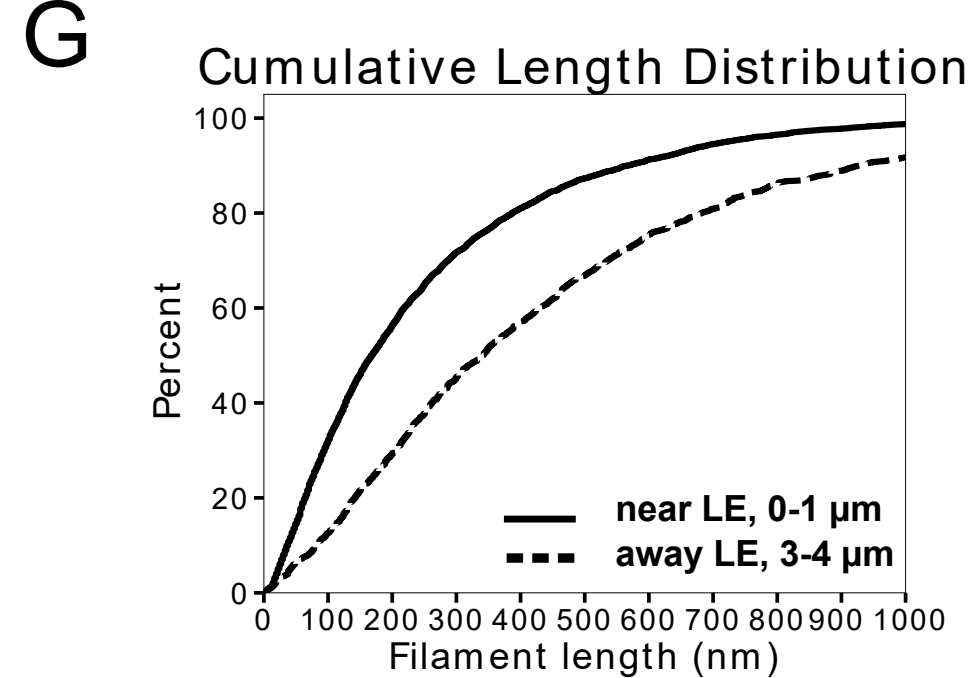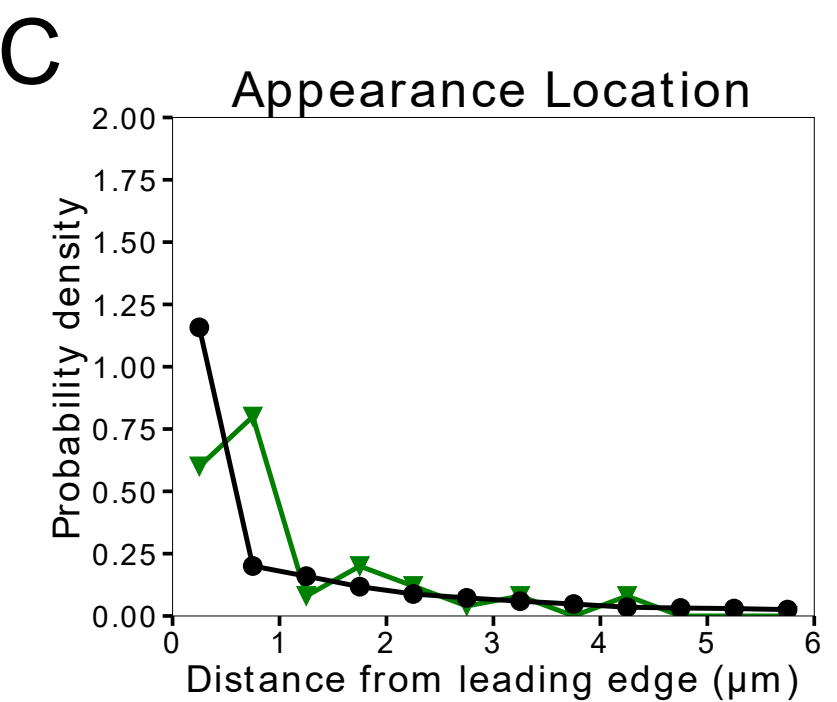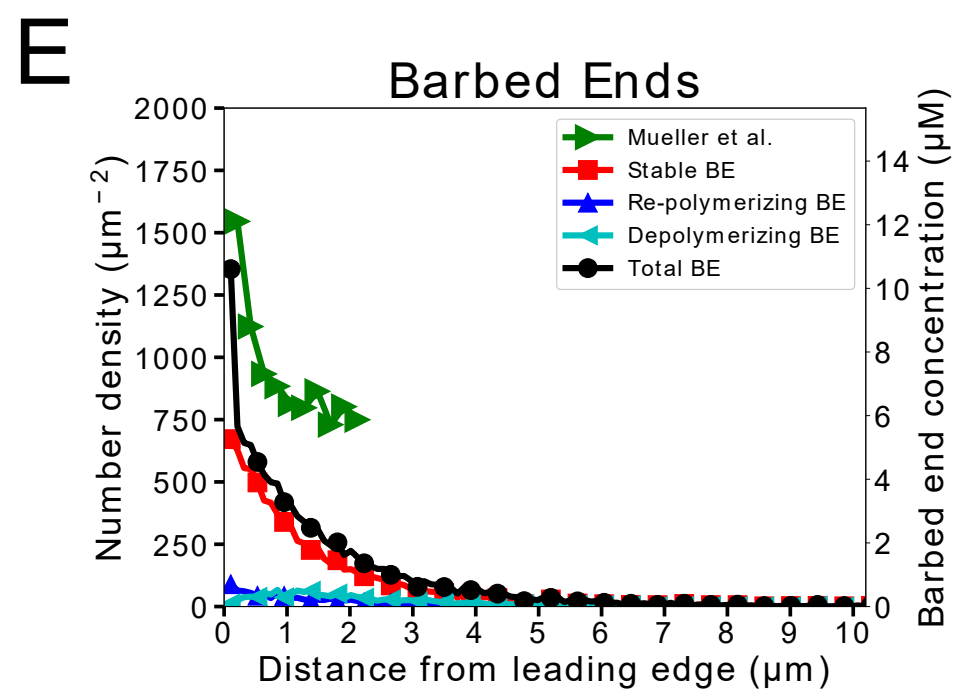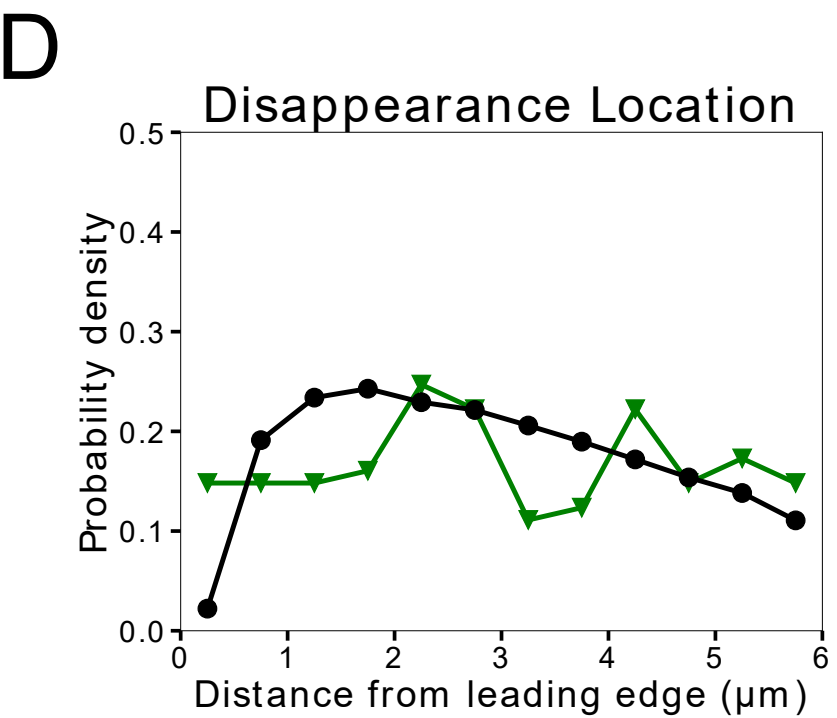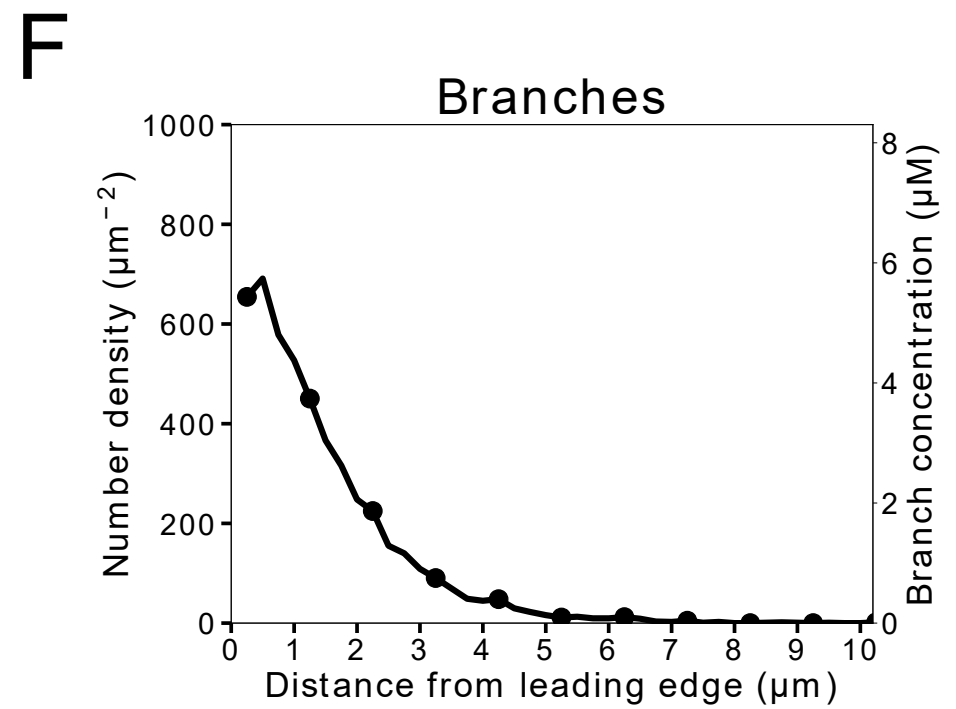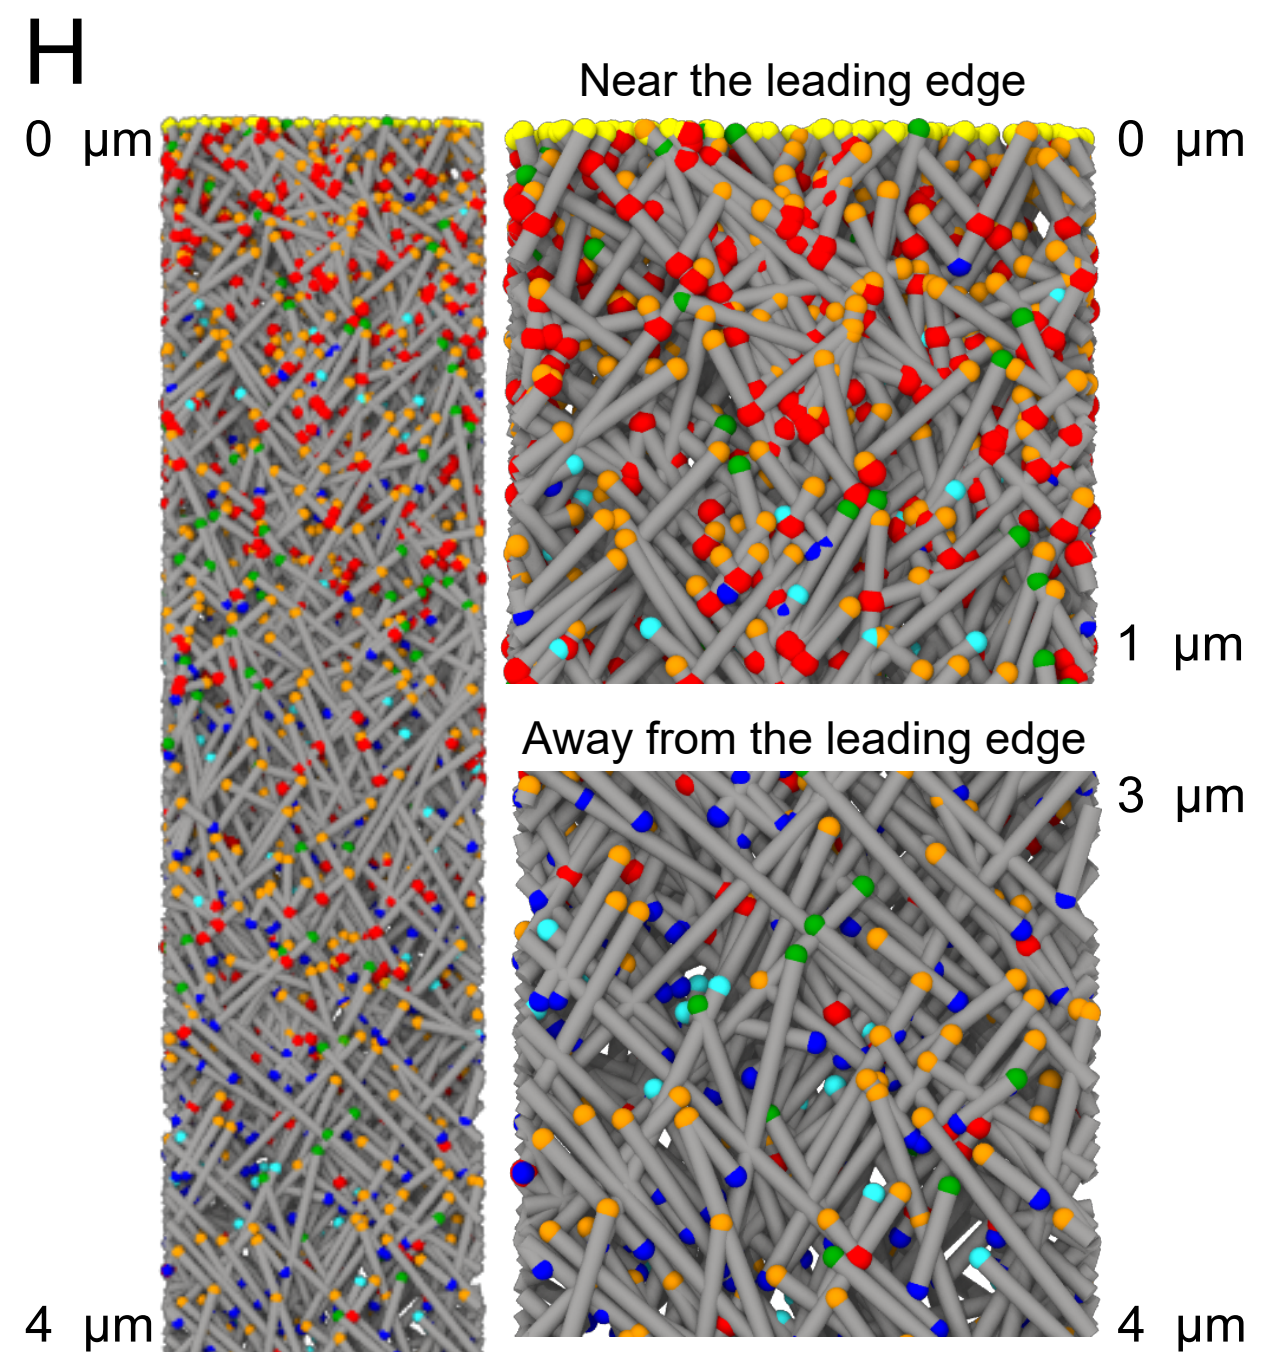

Supplement: supp [file elife-69031-supp-v1.zip]
